# Supplementary material for: Multi-Trait Genomic Prediction Improves Predictive Ability for Dry Matter Yield and Water-Soluble Carbohydrates in Perennial Ryegrass
Source: Front Plant Sci. 2020 Aug 7;11:1197. doi: 10.3389/fpls.2020.01197 (PMC7426495; doi:10.3389/fpls.2020.01197)
Supplement: Supplementary file 1 [file Table_1.xlsx]

## Sheet: Across locations
HS family	DMY Spring	DMY Late spring	DMY Summer	DMY Autumn	DMY All Cuts	GS Spring	GS Late Spring	GS Summer	GS Autumn	GS Winter	GS All Cuts
1001	37.67	42.33	19.38	27.93	31.81	5.431	6.103	4.605	3.762	4.093	4.507
1002	36.34	37.35	20.58	30.74	31.12	5.438	6.001	5.056	4.367	4.514	4.934
1003	38.14	37.75	21.6	29.43	31.73	5.301	5.528	4.555	4.253	4.685	4.628
1004	38.87	41.81	27.99	33.94	36.37	5.67	6.277	5.483	5.371	5.043	5.623
1005	38.07	40.31	30.06	30.35	34.42	5.227	5.531	4.423	4.592	4.652	4.572
1006	38.83	38.1	19.14	26.3	30.4	5.434	5.538	4.049	3.735	4.478	4.267
1007	45.79	44.36	35.78	38.52	43.1	5.755	6.205	5.681	5.495	5.242	5.77
1008	36.41	37.07	20.04	29.13	30.31	5.212	5.522	4.3	4.07	4.519	4.424
1009	36.94	37.8	18.69	27.22	29.81	5.405	5.32	3.865	4.192	4.497	4.363
1010	42.58	42.96	35.88	35.14	39.89	5.636	5.984	5.54	5.646	5.122	5.62
1011	39.5	40.75	29.05	33.2	35.9	5.585	5.391	4.802	4.59	4.743	4.826
1012	42.45	49.47	39.26	36.41	43.09	5.899	6.262	5.79	5.921	5.176	5.929
1013	40.72	39.8	24.67	32.04	34.94	5.539	5.398	4.737	4.215	4.733	4.73
1014	40.83	44.56	34.66	35.67	39.56	5.61	6.028	5.257	5.277	4.902	5.381
1015	43.71	44.33	35.82	39.75	42.5	5.771	5.971	5.292	5.501	5.032	5.543
1016	39.12	42.81	29.36	30.74	35.42	5.388	5.903	4.768	4.985	5.132	5.08
1017	38.44	40.27	29.75	33.78	35.55	5.368	5.882	4.893	5.1	4.854	5.094
1018	41.04	42.54	30.34	37.51	38.76	5.751	6.196	5.69	5.973	5.047	5.855
1019	41.97	44.84	30.2	37.08	39.81	5.815	6.257	5.387	5.857	5.223	5.805
1020	39.35	42.54	28.54	32.55	36.13	5.728	6.129	5.117	4.763	4.523	5.176
1021	42.07	42.71	33.9	35.56	39.64	5.652	5.949	5.152	5.491	5.124	5.471
1022	38.9	39.41	20.91	29.57	32.27	5.445	5.701	4.477	4.221	4.648	4.672
1023	40.41	41.7	31.41	35.76	38.2	5.618	5.953	5.361	5.704	5.019	5.587
1024	42.3	46.76	36.17	36.17	41.52	5.612	6.051	5.334	5.426	5.028	5.523
1025	37.92	38.95	20.36	27.03	30.71	5.587	5.278	4.166	4.198	4.688	4.489
1026	39.32	40.84	33.13	34.91	37.1	5.751	5.922	5.398	5.307	5.188	5.506
1027	43.7	46.51	32.93	38.58	42.03	5.751	6.206	5.535	5.737	5.048	5.748
1028	43.34	44.93	31.98	37.12	40.93	5.784	6.229	5.411	5.34	5.26	5.646
1029	38.31	39.01	22.27	29.52	32.34	5.411	5.751	4.783	4.636	4.652	4.892
1030	44.48	44.71	33.14	37.37	41.61	5.91	6.253	5.756	5.979	5.304	6.035
1031	41.66	40.64	30.48	36.05	38.35	5.614	5.671	5.228	5.125	4.99	5.318
1032	40.52	41.12	32.91	36.28	38.36	5.566	5.938	5.788	5.359	4.882	5.58
1033	39.03	37.23	22.16	30.19	32.4	5.477	5.734	4.646	4.53	4.473	4.774
1034	35.93	33.32	18.03	25.69	27.35	5.314	5.354	4.159	3.683	4.292	4.188
1035	38.83	40.82	28.18	34.99	35.47	5.395	6.029	5.265	4.973	4.875	5.13
1036	35.77	38.74	20.52	28.42	30.3	5.407	5.656	4.552	4.038	4.27	4.502
1037	43.98	44.05	36.95	37.4	42.13	5.665	5.95	5.42	5.63	5.309	5.633
1038	45.24	44.81	34.5	37.31	42.4	6.031	6.106	5.421	5.577	5.489	5.793
1039	39.24	43.99	31.16	35.39	38.01	5.886	6.163	5.515	5.484	5.323	5.721
1040	40.41	44.5	28.9	32.93	37.52	5.619	5.858	4.871	5.314	4.869	5.267
1041	39.63	39.68	19.59	27.25	31.8	5.83	5.758	4.439	4.25	4.72	4.828
1042	42.06	42.77	32.74	37.12	40.16	5.547	6	5.324	5.172	4.76	5.357
1044	40.74	42.33	32.41	33.58	37.87	5.634	5.864	4.568	5.017	5.161	5.107
1045	43.54	42.19	31.71	34.18	38.91	5.758	6.062	5	5.021	4.995	5.269
1046	41.3	46.25	35.94	37.73	41.48	5.657	6.101	5.416	5.535	5.021	5.607
1047	42.81	41.91	31.66	35.06	39.18	5.914	6.3	5.8	5.505	5.407	5.95
1048	40.72	41.11	27.41	29.55	34.94	5.45	5.949	4.662	4.607	4.681	4.864
1049	39.42	42.88	34.24	36.02	38.58	5.567	6.047	5.272	5.236	5.064	5.412
1050	40.34	42.59	30.89	32.43	36.91	5.581	6.203	5.314	4.959	4.88	5.332
1051	37.56	36.35	21.04	30.16	31.26	5.333	5.666	4.676	4.493	4.569	4.771
1052	39.74	42.01	25.82	30.72	34.52	5.643	6.264	5.02	4.4	4.564	5.024
1053	41.95	42.27	30.97	34.9	38.52	5.565	5.737	5.068	5.021	4.783	5.121
1054	41.8	40.31	29.38	36.23	38	5.531	6.213	5.643	5.435	5.075	5.649
1055	42.51	44.32	29.93	32.91	38.55	5.461	6.064	5.078	4.833	4.906	5.171
1056	38.48	38.67	18.11	25.8	29.72	5.507	5.803	4.565	3.973	4.221	4.536
1057	37.42	37.52	19.56	29.04	30.44	5.402	5.69	4.119	3.949	4.431	4.364
1058	40.23	43.08	29.39	35.3	37.84	5.633	5.875	4.988	5.496	4.962	5.39
1059	44.57	44.19	33.24	39.14	41.92	5.828	6.3	5.819	6.108	5.373	6.049
1060	40.65	43.57	35.76	34.78	39.06	5.934	6.335	5.508	5.462	5.113	5.734
1061	40.63	43.2	28.63	32.24	36.65	5.81	5.791	5.045	5.059	4.775	5.263
1062	39.08	39.89	24.54	31.77	34	5.514	5.539	4.645	5.101	4.867	4.982
1063	38.75	40.4	20.29	28.73	32.04	5.524	5.769	4.9	4.349	4.937	4.881
1064	36.83	37.57	17.15	28.78	29.85	5.275	5.927	4.424	4.17	4.695	4.605
1065	40.3	42.1	31.43	32.31	36.8	5.343	5.822	4.698	5.348	5.037	5.149
1066	36.13	37.56	20.5	30.42	30.87	5.059	5.726	4.753	4.252	4.302	4.558
1067	41.76	42.44	31.18	36.53	38.77	5.478	5.884	5.31	5.546	5.031	5.436
1068	40.27	40.82	27.82	34.44	36.32	5.597	6.158	5.258	5.194	5.027	5.396
1069	43.48	42.92	30.29	36.44	39.69	5.572	6.067	4.847	5.291	5.34	5.346
1070	44.92	48.05	35.34	42.99	45.03	5.931	6.214	6.104	6.062	5.497	6.169
1071	43.64	45.19	32.42	37.95	41.49	5.635	6.082	5.376	5.26	4.769	5.404
1072	41.43	43.2	32.35	34.7	38.95	5.628	6.087	5.469	5.342	5.028	5.548
1073	36.49	36.86	19.38	27.36	29.8	5.579	5.742	4.314	4.615	4.583	4.797
1074	37.15	35.16	18.68	28.39	29.41	5.42	5.298	4.32	3.905	4.666	4.425
1075	42.18	43.88	35.32	33.13	39.69	5.628	6.268	5.096	4.988	4.883	5.352
1076	39.76	39.78	22.3	26.44	31.96	5.342	5.924	4.454	4.246	4.339	4.578
1077	39.77	46.65	28.93	32.73	37.24	5.624	5.939	5.029	4.961	4.873	5.118
1078	43.41	44.87	35.5	37.95	41.96	5.802	6.287	5.547	5.91	5.24	5.885
1079	40.51	44.8	31.35	37.11	39.35	5.484	6.06	5.12	5.37	4.876	5.366
1080	40.36	44.54	28.62	33.27	37.23	5.552	6.125	5.531	4.514	4.662	5.172
1081	42.59	42.88	33.05	36.66	39.87	5.797	6.225	5.511	4.994	5.205	5.513
1082	42.13	43.68	30.38	33.56	38.46	5.661	5.619	4.909	5.021	4.949	5.139
1083	44.88	46.25	35.2	34.75	41.85	5.591	6.265	5.06	5.314	5.338	5.481
1084	39.35	40.97	24.26	31.62	34.37	5.547	5.662	4.791	4.729	4.95	4.972
1085	40.85	41.4	21.21	29.49	33.68	5.654	5.958	4.475	4.372	4.742	4.839
1086	41.08	39.84	21.64	29.64	33.49	5.468	5.557	4.643	4.379	4.737	4.724
1087	43.74	45.09	36.99	40.52	43.33	5.629	6.216	5.533	5.964	5.174	5.828
1089	42.37	41.27	26.31	35.69	37.59	5.747	6.102	5.352	5.08	5.107	5.453
1090	40.83	42.59	30.79	35.73	38.1	5.755	6.049	5.474	5.667	5.154	5.722
1091	41.48	42.81	33.36	34.07	38.7	5.862	6.062	5.262	5.37	5.039	5.525
1092	42.22	43.52	32.68	31.94	38.29	5.621	5.791	4.844	5.133	5.255	5.269
1093	37.77	40.41	20.85	30.1	32.43	5.483	5.848	4.571	4.534	4.467	4.841
1094	41.92	43.36	32.68	34.92	39.32	5.702	5.93	5.18	5.36	5.335	5.498
1095	38.71	36.61	18.94	32.35	32.02	5.26	5.788	5.007	4.306	4.712	4.863
1096	40.37	41.29	25.7	32.11	35.47	5.602	6.016	5.13	4.574	4.869	5.119
1097	40.67	42.44	32.47	36.4	38.76	5.56	6.233	5.692	5.583	5.22	5.704
1098	39.18	38.66	27.39	30.48	33.94	5.49	5.673	4.591	4.837	5.087	4.916
1099	40.56	41.25	31.48	38.14	38.79	5.425	6.034	5.583	5.674	5.131	5.631
1100	41.45	45.22	31.45	33.35	38.69	5.834	6.242	5.485	5.457	4.987	5.678
2001	40.58	41.82	31.51	34.38	38.21	5.64	6.081	5.283	5.017	4.75	5.419
2005	38.69	39.79	29.09	31.96	35.3	5.449	6.081	5.433	4.676	4.977	5.399
2006	41.49	43.21	29.21	34.63	38.64	5.761	6.298	5.698	5.349	4.973	5.88
2008	39.79	39.06	25.92	31.38	34.47	5.421	5.705	4.748	4.602	4.799	4.982
2009	41.87	42.25	29.66	37.07	39.2	5.327	5.876	5.014	5.169	5.183	5.369
2010	39.06	41.58	28.96	33.45	36.4	5.625	5.908	5.135	5.141	4.96	5.456
2011	39.42	41.99	30.05	32.9	36.66	5.818	6.112	5.936	4.955	4.78	5.691
2013	40.93	45.06	36.13	34.75	40.16	5.772	5.952	5.555	5.385	4.943	5.694
2014	38.85	40.09	25.77	33.85	34.75	5.356	6.026	5.282	4.891	4.651	5.187
2015	37.33	41.03	29.53	30.37	34.77	5.727	5.868	5.705	4.899	4.852	5.534
2016	38.98	39.87	22.25	30.14	33.02	5.553	5.654	4.829	4.401	4.674	4.955
2017	38.4	40.68	29.37	36	37.03	5.508	6.139	5.767	5.221	4.926	5.732
2018	39.37	44.14	34.68	33.7	38.87	5.533	5.812	5.55	5.18	4.898	5.51
2019	38.94	41.66	29.93	34.37	36.83	5.499	5.903	5.403	5.186	4.888	5.472
2020	39.9	42.16	31.6	31.31	36.82	5.737	5.998	5.297	5.294	4.797	5.529
2022	36.83	40.07	27.74	30.89	33.95	5.331	5.556	4.828	4.854	4.703	5.032
2023	38.31	43.36	31.78	34.32	37.58	5.757	6.062	5.825	5.364	4.924	5.793
2024	40.26	42.82	33.22	32.12	37.78	5.444	5.853	5.365	5.331	5.076	5.505
2025	42.69	44.97	31.94	34.39	40.08	5.67	6.119	5.425	5.05	5.106	5.601
2026	40.02	40.78	30.54	32.98	36.95	5.676	5.657	5.168	5.387	5.229	5.542
2027	37.39	41.23	30.18	32.27	35.45	5.502	6.215	5.538	4.881	4.594	5.429
2028	41	44.68	31.83	36.54	39.88	5.598	5.825	5.437	5.278	5.217	5.579
2029	41.35	43.23	30.32	35.92	39.09	5.743	6.27	5.409	5.345	5.202	5.782
2030	42.14	42.4	28.91	38.77	40.85	5.757	6.063	5.64	5.594	5.292	6.008
2031	42.8	44.88	34.64	35.42	40.94	5.718	6.359	6.06	5.282	4.96	5.881
2032	41.09	44.75	31.97	34.58	39.44	5.683	6.237	5.573	5.355	4.933	5.724
2033	39.1	38.67	26.32	32.47	34.79	5.467	5.931	4.691	4.904	4.568	5.127
2034	39.88	41.36	32.66	32.9	37.14	5.73	6.078	5.739	5.504	4.915	5.785
2036	40.71	41.22	28.5	32.75	36.78	5.646	5.914	5.353	4.837	4.905	5.417
2037	42.01	42.84	30.3	32.44	38.14	5.783	5.837	5.247	5.385	4.966	5.582
2038	40.56	41.53	31.3	33.4	37.57	5.737	5.915	5.182	5.247	5.189	5.556
2039	40.38	43.29	31.6	33.09	38.11	5.486	6.149	5.477	5.272	4.854	5.557
2040	42.06	39.09	27.79	34.33	37.08	5.37	5.796	5.414	4.949	5.013	5.407
2041	41.48	41.48	28.43	33.84	37.38	5.61	6.085	5.404	5.348	5.066	5.677
2042	40.12	43.52	28.12	34.43	37.88	5.589	6.151	5.576	5.3	4.769	5.629
2043	41.7	41.05	28.31	33.58	37.63	5.559	6.229	5.686	4.862	4.866	5.596
2045	40.77	42.23	30.3	35.65	38.58	5.473	5.985	5.444	5.122	4.683	5.476
2046	41	43.2	30.32	34.42	38.44	5.681	6.11	5.312	5.251	5.071	5.627
2047	43.71	42.02	32.07	35.09	39.94	5.929	6.124	5.494	5.281	4.975	5.722
2048	40.71	44.15	32.83	34.01	38.96	5.793	6.105	5.44	5.037	4.83	5.584
2049	37.8	35.2	17.63	26.94	29.31	5.431	5.795	4.447	3.866	4.398	4.645
2050	42.29	45.16	33.18	34.96	40.16	5.633	5.846	5.724	5.48	5.165	5.763
2051	38.77	41.23	28.16	32.43	35.77	5.537	5.91	5.404	4.835	4.786	5.393
2052	39.96	41.02	25.94	32.49	35.64	5.658	5.847	4.821	4.984	4.963	5.286
2053	43.82	44.76	32.35	36.84	41.31	5.768	6.262	5.852	5.117	5.262	5.844
2055	39.03	45.98	34.66	34.05	39.22	5.384	5.946	5.154	5.214	4.951	5.409
2056	41.13	43.35	28.74	35.04	38.52	5.744	6.123	5.422	5.119	4.795	5.587
2057	39.66	40.74	27.85	33.23	36.35	5.482	5.703	4.964	4.93	4.808	5.223
2058	39.42	41.61	26.33	33.52	36	5.414	6.009	5.453	5.026	4.778	5.437
2059	41.77	43.82	34.99	38.23	41.23	5.91	5.969	5.648	5.838	5.332	5.974
2060	43.92	43.32	31.98	36.15	40.9	5.653	6.251	5.502	5.433	5.013	5.75
2061	41.3	44.15	27.4	31.96	37.1	5.789	6.02	5.357	5.183	5.33	5.646
2062	37.61	39.88	26.54	32.28	34.42	5.421	5.669	5.266	5.023	4.639	5.277
2063	39.11	39.23	23.22	31.44	33.84	5.585	5.829	5.105	4.983	4.876	5.341
2065	38.08	38.67	25.6	31.18	33.73	5.447	5.436	4.985	4.825	4.672	5.084
2066	43.28	47.91	38.04	38.62	43.82	5.611	6.239	5.722	5.397	4.985	5.771
2068	39.37	41	33.3	34.21	37.72	5.423	6.171	5.621	5.088	4.965	5.577
2069	39.53	41.59	27.46	33.1	36.07	5.679	6.002	5.327	5.26	4.743	5.479
2070	44.42	45.39	36.4	35.68	42.16	5.806	6.445	6.149	5.804	5.136	6.173
2071	36.6	36.37	23.33	32.14	32.32	5.376	5.78	4.629	4.777	4.583	5.017
2072	38.99	41.46	31.51	33.7	36.8	5.546	5.997	5.477	5.466	5.243	5.763
2073	38.06	39.34	30.94	32.23	35.36	5.693	5.999	5.371	4.869	4.756	5.431
2074	35.21	35.65	25.72	28.98	30.77	5.28	5.647	4.986	4.703	4.495	5.027
2075	42.42	44.26	33.5	36.87	40.7	5.894	6.156	5.637	5.285	5.083	5.809
2076	39.78	39.76	26.75	35.89	36.05	5.548	5.957	5.012	4.988	5.165	5.379
2077	41.06	43.3	31.07	32.16	37.96	5.838	5.799	5.668	5.033	4.914	5.626
2078	39.84	40.07	31.05	34.08	37.08	5.683	6.094	5.636	5.345	4.842	5.729
2079	40.67	42.47	32.41	34.48	38.39	5.765	6.182	5.66	5.38	5.013	5.804
2080	42.07	45.42	33.8	35.92	40.77	5.844	6.13	5.774	5.422	4.887	5.844
2081	42.1	46.27	35.24	35.42	41.23	5.924	5.948	5.549	5.32	5.357	5.779
2082	39.67	40.58	32.67	32.97	37.06	5.663	5.863	5.504	5.034	4.589	5.437
2083	42.85	44.93	31.1	35.15	39.92	5.923	6.024	5.419	5.241	5.123	5.7
2085	41.82	43.31	33.45	36.6	40.17	5.802	6.156	5.835	5.142	5.034	5.763
2086	39.17	42.14	34.21	34.65	38.16	5.514	5.948	5.353	5.567	4.772	5.586
2087	42.94	44.03	29.65	33.98	39.37	6.123	6.088	5.406	5.11	4.837	5.699
2088	40.83	44.25	30.15	33.79	38.47	5.494	5.975	5.242	5.138	4.712	5.403
2089	39.67	37.81	26.13	31.67	34.21	5.644	5.958	5.439	5.357	4.954	5.644
2090	39.33	42.17	32.93	33.34	37.58	5.664	6.115	5.697	5.356	4.936	5.723
2091	39.42	40.03	22.18	31.05	34.14	5.41	5.969	5.1	4.334	4.743	5.111
2092	43	45.24	33.84	38.91	42.27	5.905	6.422	6.102	5.267	5.247	6.06
2093	43.32	43.55	36.58	39.03	42.41	5.832	6.043	5.954	5.822	5.569	6.102
2095	41.47	42.56	31.43	34.01	38.57	5.967	6.344	5.757	5.61	5.008	6
2097	39.94	43.64	36.7	37.34	40.35	5.514	6.097	5.758	5.603	4.912	5.777
2098	39.99	42.48	30.4	31.7	36.94	5.727	5.962	5.073	5.154	4.948	5.472
2099	42.62	45.48	38.05	34.91	41.47	5.844	5.985	5.174	5.595	5.088	5.684
2100	38.9	39.51	32.29	36.12	37.49	5.588	6.219	5.798	5.188	4.658	5.663
3001	42.76	45.45	32.12	37.3	41.78	5.731	6.024	5.677	5.376	4.908	5.738
3002	40.75	42.64	35.19	37.55	40.71	5.69	5.922	5.652	5.65	5.118	5.821
3003	39.82	42.23	35.05	35.74	39.69	5.548	6.048	5.495	5.247	4.933	5.63
3004	43.9	46.84	36.62	40.85	45.13	5.864	6.303	5.968	5.699	5.341	6.14
3005	38.86	41.46	32.37	35.23	38.3	5.748	5.848	5.708	5.738	4.862	5.815
3006	39.44	38.19	26.82	32.27	35.38	5.696	5.911	5.009	5.168	4.827	5.398
3007	44.03	43.91	32.48	39.52	42.96	5.645	6.123	5.585	5.683	5.202	5.855
3008	36.72	36.22	16.78	24.59	29.03	5.35	5.507	4.171	3.632	4.244	4.331
3009	41.49	44.37	32.57	34.78	40.3	5.532	6.073	5.83	5.689	5.207	5.904
3010	41.44	44.3	32.28	38.89	41.64	5.686	6.203	5.869	5.789	4.798	5.956
3011	41.38	42.19	31.4	35.42	39	5.69	6.132	5.341	4.923	4.838	5.447
3012	38.61	43.45	31.25	31.97	37.28	5.302	5.772	4.906	4.491	4.471	4.781
3013	40.29	42.15	28.62	35.73	38.76	5.442	5.899	5.219	5.208	4.834	5.383
3014	39.54	42.63	32.13	35.4	38.98	5.502	5.686	5.428	5.346	4.947	5.488
3015	41.15	45.59	34.41	38.3	42.07	5.919	6.191	5.695	5.334	4.923	5.807
3016	42.13	44.62	36.94	38.78	42.82	5.688	6.142	5.646	5.559	5.182	5.833
3017	39.78	41.28	29.16	34.94	37.83	5.514	5.925	5.393	5.581	4.833	5.583
3018	40.46	41.02	33.91	34.83	39.17	5.562	5.815	5.207	5.414	4.929	5.492
3019	39.42	43.46	33.63	34.18	39.17	5.687	6.086	5.114	5.292	4.797	5.505
3020	40.74	43.59	33.98	36.12	40.61	5.61	6.093	5.637	5.294	4.913	5.676
3021	39.04	43.1	28.19	32.82	37.21	5.282	5.98	5.467	4.903	4.742	5.347
3022	41.78	41.99	27.04	32.66	37.84	5.796	6.071	5.32	5.039	5.014	5.576
3023	39.92	39.29	29.22	33.54	36.73	5.671	5.575	4.981	5.015	4.705	5.235
3024	43.02	42.85	33.74	34.29	40.87	5.816	5.887	5.138	5.307	4.996	5.578
3025	41.62	43.42	35.3	37.26	41.26	5.811	6.043	5.457	5.755	4.946	5.789
3026	43.36	44.13	35.16	37.69	42.43	5.571	6.1	5.361	5.342	4.992	5.605
3027	40.15	41.13	29.07	31.86	36.88	5.696	5.844	5.183	5.415	4.713	5.493
3028	39.94	41.88	30.5	33.57	37.98	5.706	6.092	5.38	5.19	5	5.623
3029	39.69	40.87	32.08	34.2	38.09	5.504	5.894	5.153	5.244	5.125	5.455
3030	40.05	41.93	37.11	37.33	40.8	5.583	6.002	5.793	5.735	5.053	5.849
3031	39.26	42.43	34.34	38.46	40.58	5.71	6.242	5.71	5.569	4.929	5.87
3032	38.75	42.08	29.51	34.22	37.5	5.439	5.657	5.139	4.926	4.955	5.291
3033	43.66	42.25	27.47	32.62	38.81	5.74	5.945	5.243	4.92	4.889	5.427
3034	42.93	47.13	29.87	35.56	41.36	5.797	6.197	5.447	5.251	5.105	5.714
3035	39.75	41.76	32.25	35.59	39.11	5.607	6.058	5.534	5.602	4.904	5.73
3036	41.72	45.32	32.1	38.01	41.59	5.831	5.707	5.4	5.39	5.303	5.685
3037	38.66	41.3	29.79	35.11	37.89	5.489	5.739	5.305	5.277	4.885	5.448
3038	39.53	40.67	33.3	37	39.37	5.484	5.96	5.45	5.43	5.254	5.649
3039	42.21	42.06	32.26	36.9	40.5	5.674	6.201	5.692	5.618	4.9	5.844
3040	42.41	45.18	37.19	39.58	43.54	5.628	5.969	5.435	5.474	5.055	5.68
3041	40.14	42.85	30.95	35.06	38.9	5.624	6.135	5.504	5.204	5.024	5.635
3042	40.84	41.52	29.02	32.16	37.36	5.327	5.715	4.839	4.807	5.018	5.101
3043	40.3	40.65	30.47	37.1	39.16	5.532	6.337	5.66	5.131	5.102	5.728
3044	39.2	40.43	29.04	35.3	37.58	5.444	5.907	5.499	5.523	4.958	5.648
3045	37.22	38.27	30.05	31.69	35.27	5.128	5.73	5.106	4.771	4.526	5.048
3046	39.72	43.64	34.06	40.04	41.35	5.552	5.993	5.376	5.569	5.085	5.674
3047	40.09	45.46	32.22	35.81	40.07	5.53	6.012	5.567	5.195	4.897	5.569
3048	40.08	42.41	32.34	35.75	39.31	5.549	6.05	5.431	5.166	4.671	5.505
3049	41.41	43.38	30.86	34.98	39.62	5.702	5.697	5.408	5.259	4.957	5.547
3050	39.7	42.79	35.89	37.51	40.69	5.658	6.289	5.935	5.445	4.899	5.888
3051	42.75	45.54	33.32	35.77	41.73	5.894	6.066	5.686	5.331	4.97	5.791
3052	42.91	44.11	35.82	38.81	43.14	5.652	6.02	5.774	5.593	5.224	5.879
3053	42.38	41.48	29.2	36.21	39.81	5.805	6.205	5.354	5.283	5.144	5.705
3054	40.19	44.66	32.42	33.83	39.5	5.641	6.095	5.108	4.945	4.798	5.401
3055	41.01	42.75	33	34.21	39.57	5.485	6.017	5.543	5.353	5.059	5.678
3056	40.24	38.91	23.89	30.04	34.49	5.534	5.694	4.973	4.739	4.777	5.16
3057	40.81	41.68	28.17	32.52	37.37	5.549	5.669	5.14	5.076	4.985	5.339
3058	42.11	42.27	29.35	37.58	40.65	5.628	5.781	5.124	5.472	5.125	5.499
3059	39.6	38.81	24.91	31.32	34.74	5.692	5.757	4.911	4.59	4.698	5.145
3060	40.15	46.15	31.28	34.64	40.05	5.519	5.651	5.356	5.372	5.009	5.527
3061	39.8	41.03	25.34	29.94	35.36	5.531	6.003	5.004	5.223	5.096	5.464
3062	41.67	45.96	28.65	37.4	40.64	5.706	6.054	5.452	5.492	5.265	5.747
3063	39.14	40.96	32.6	34.25	38	5.654	5.988	5.47	5.274	5.15	5.676
3064	39.54	43.32	34.36	36.79	40.35	5.673	6.149	5.523	5.835	5.17	5.89
3065	40.24	46.51	34.84	38.62	42.42	5.457	5.974	5.472	5.733	5.023	5.751
3066	43.56	44.58	34.8	37.73	42.65	5.523	5.769	5.441	5.588	5.226	5.68
3067	40.22	42.3	32.48	35.8	39.37	5.515	5.986	5.432	5.212	4.925	5.541
3068	42.21	43.34	30.58	34.43	39.68	5.613	6.176	5.398	5.19	4.674	5.547
3069	42.75	43.75	31.64	33.77	39.98	5.964	6.034	5.443	5.436	5.387	5.847
3070	40.5	45.32	32.85	35.39	40.33	5.496	6.018	5.361	5.388	4.988	5.592
3071	40.64	42.63	31.24	35.57	39.32	5.316	5.932	5.126	4.811	4.803	5.217
3072	39.79	40.92	28.09	32.91	36.87	5.482	5.769	4.931	5.196	4.708	5.283
3073	41.9	45.17	28.84	33.39	39.62	5.867	6.109	5.341	5.265	4.996	5.695
3074	41.03	44.51	33.73	35.74	40.59	5.648	6.08	5.729	5.542	4.653	5.728
3075	37.63	38.31	27.06	33.24	35.28	5.394	5.689	5.204	5.272	4.726	5.384
3076	43.37	44.8	32.25	34.19	40.86	5.721	5.961	5.415	5.1	5.08	5.572
3077	41.39	43.2	31.17	35.73	40.42	5.702	6.175	5.338	5.206	5.155	5.704
3078	40.43	42.53	28.58	33.7	38.07	5.693	5.952	5.028	4.932	4.924	5.362
3079	40.37	43.12	31.65	35.79	39.69	5.775	5.975	5.693	5.306	5.071	5.76
3080	40.99	45.48	34.35	37	41.6	5.574	6.018	5.655	5.742	5.027	5.813
3082	42.28	45.07	36.34	37.35	42.59	5.867	6.078	5.65	5.48	5.331	5.888
3083	37.73	38.74	26.43	31.96	34.76	5.509	5.836	5.076	5.092	4.829	5.346
3084	41.15	39.77	27.78	34.72	37.61	5.644	5.858	5.168	5.416	5.142	5.595
3085	41.4	45.86	28.4	32.17	38.85	5.404	6.018	5.267	4.839	4.942	5.338
3087	37.46	40.95	29.12	34.2	36.64	5.479	6.028	5.165	5.344	4.695	5.472
3088	40.96	43.99	37.3	37.68	41.87	5.694	6.157	5.568	5.582	4.951	5.815
3089	40.09	43.18	30.38	35.12	39.19	5.476	5.895	5.326	5.091	4.794	5.408
3090	40.14	41.93	30.76	34.24	38.46	5.727	5.956	5.444	5.352	4.744	5.645
3091	38.85	40.03	28.03	33.36	36.39	5.473	6.161	5.642	5.321	4.707	5.615
3092	42.19	43.56	32.28	38.49	41.88	5.655	5.879	5.78	5.324	4.764	5.704
3093	40.44	40.07	31.65	32.38	37.49	5.602	5.833	4.889	5.035	4.857	5.296
3094	41.07	42.16	33.24	37.42	40.49	5.874	6.217	6.003	5.597	5.036	6.028
3095	41.07	43.57	31.98	36.86	40.69	5.469	6.076	5.221	5.149	4.932	5.489
3096	43.15	43.44	31.18	40.46	42.32	5.701	6.248	5.904	5.664	5.5	6.076
3097	40.67	43.85	34.2	36.3	40.84	5.689	6.313	5.745	5.318	5.025	5.862
3098	41.43	39.2	27.52	36.59	38.21	5.607	6.055	5.563	5.495	4.985	5.714
3099	41.41	40.34	28.44	34.47	37.82	5.931	5.933	5.427	5.107	5.105	5.671
3100	42.28	42.43	28.95	37.42	40.35	5.765	6.054	5.386	5.192	5.119	5.679
4001	40.75	44.42	32.37	35.03	38.73	5.705	6.034	5.497	5.179	4.933	5.558
4002	37.01	38.88	20.18	28.93	30.8	5.414	5.97	4.713	3.974	4.608	4.762
4003	37.39	41.3	30.93	35.63	36.25	5.491	5.902	5.461	5.069	4.785	5.399
4004	41.3	44.01	33.75	34.29	38.73	5.861	6.516	5.663	5.367	5.18	5.847
4005	40.42	39.57	27.66	34.23	36.02	5.47	5.664	4.975	5.208	4.741	5.259
4006	38.84	44.53	22.58	31.97	34.8	5.766	6.293	5.257	5.033	4.896	5.505
4007	40.25	47.33	31	34.27	38.8	5.633	6.279	5.307	4.949	4.607	5.377
4008	39.09	42.76	28.66	29.98	35.05	5.759	5.685	4.823	4.77	4.696	5.088
4009	41.56	45.12	25.54	33.49	37.37	5.807	6.017	4.931	4.938	5.263	5.41
4010	41.12	42.34	28.68	33.01	36.74	5.735	6.058	5.419	4.856	4.971	5.465
4011	41.57	42.95	27.82	35.09	37.74	5.744	6.359	5.339	5.228	5.084	5.631
4012	44.08	43.81	28.15	33.34	38.53	5.734	5.963	5.062	4.843	4.937	5.337
4013	40.41	43.97	25.55	33.25	36.47	5.825	6.257	5.079	5.114	5.093	5.526
4014	39.37	39.98	27.1	34.38	35.72	5.563	5.949	5.496	5.297	4.812	5.567
4015	44.08	46.63	32.71	36.15	41.17	5.595	6.387	5.598	5.238	4.998	5.656
4016	43.97	47.05	33.69	36.43	41.74	5.772	6.27	5.562	5.434	5.287	5.791
4017	41.04	43.48	27.64	33.64	36.98	5.843	5.993	5.2	4.994	5.202	5.477
4018	38.29	40.93	26.91	29.84	33.81	5.521	6.017	4.897	4.758	4.6	5.106
4019	42.36	44.6	27.23	35.01	38.47	5.747	6.132	5.32	5.311	5.156	5.622
4020	41.01	44.64	29.16	34.57	37.98	5.729	6.131	5.521	5.361	4.999	5.675
4021	42.3	40.33	22.85	31.32	34.94	5.838	5.953	4.791	4.89	5.247	5.397
4022	41.7	42.37	27.62	36.62	38.1	5.646	5.993	5.423	5.537	5.19	5.683
4023	41.63	39.17	28.26	36.15	37.09	5.483	5.978	5.195	5.104	5.226	5.427
4024	39.43	39.65	23.29	32.01	33.83	5.466	6.032	4.322	4.332	4.866	4.858
4025	42.77	46.89	30.71	35.66	40.22	5.973	6.047	5.662	5.383	5.578	5.905
4026	39.73	42.15	22.58	30.57	33.88	5.602	5.845	4.39	4.603	4.782	4.938
4027	41.7	47.2	26.63	33.99	38.38	5.722	6.43	5.166	5.348	5.115	5.624
4028	39.41	42.93	27.54	29.75	34.86	5.704	6.542	5.296	4.536	4.81	5.355
4029	39.79	41.62	25.65	34.06	35.93	5.493	6.21	4.854	4.896	4.679	5.233
4030	41.37	41.61	28.48	35.87	37.6	5.743	6.09	5.7	5.18	5.104	5.709
4031	43.58	44.53	25.52	32.72	37.62	5.68	5.84	4.73	4.962	5.293	5.261
4032	37.86	38.26	22.45	28.66	31.43	5.412	5.495	4.607	4.8	4.858	4.948
4033	40.52	42.12	27.24	28.36	34.43	5.515	5.902	4.744	4.659	4.984	5.057
4034	42.33	41.55	26.7	34.84	37.31	5.488	6.069	5.252	4.756	4.899	5.315
4035	43.72	45.09	30.66	34.38	39.56	5.938	6.578	5.622	5.167	5.195	5.81
4036	43.14	41.94	26.6	35.03	37.92	5.813	6.24	5.388	5.047	5.334	5.656
4037	38.87	36.93	21.8	30.23	31.92	5.356	5.945	4.832	4.488	4.644	4.968
4038	41.65	42.39	26.81	35.79	37.73	5.816	6.179	5.268	5.225	5.192	5.651
4040	38.53	37.83	22.58	34.05	33.42	5.588	6.207	5.066	5.028	4.767	5.37
4041	40	38.69	24.12	28.45	32.9	5.508	5.88	4.439	4.632	4.926	4.983
4043	37.65	42.27	24.27	31.23	33.98	5.801	6.165	5.362	4.899	4.822	5.477
4044	41.2	41.87	28.38	38.06	38.56	5.535	5.934	5.704	5.403	5.053	5.707
4045	37.45	37.73	21.42	33.66	32.54	5.478	5.87	5.078	4.727	4.599	5.155
4046	39.45	44.91	30.34	36.7	38.69	5.328	6.262	5.461	5.18	4.974	5.533
4047	38.81	43.64	26.06	29.62	34.64	5.366	5.827	4.613	4.817	4.835	5.003
4048	39.42	33.96	19.02	32.59	31.68	5.496	5.546	4.682	4.558	4.542	4.931
4050	39.2	41.21	24.93	34.07	35.12	5.504	5.913	5.288	5.425	4.805	5.454
4051	38.25	43.99	26.85	32.81	35.58	5.688	5.829	4.656	4.594	4.859	5.053
4052	39.67	48	34.17	34.61	39.51	5.865	6.409	5.574	5.54	5.105	5.835
4053	38.74	38.63	25.56	32.06	32.66	5.567	5.996	5.506	5.294	5.172	5.664
4054	42.11	42.85	27.24	33.15	37.12	5.738	5.807	5.726	5.32	5.243	5.751
4055	37.3	35.89	19.29	26.41	28.98	5.279	5.795	4.495	3.876	4.822	4.636
4056	42.01	44.32	28.05	36.95	38.96	5.728	6.217	5.513	5.357	5.094	5.727
4057	36.87	40	23.59	30.02	32.32	5.601	5.927	4.727	4.613	4.649	5.04
4058	40.38	40.37	31.39	34.9	37.3	5.508	5.833	5.062	5.138	4.982	5.314
4059	42.75	43.24	22.79	32.69	36.4	5.804	6.004	4.751	4.622	4.876	5.191
4060	40.27	42.53	27.7	34.92	36.85	5.382	6.09	5.149	5.108	4.891	5.334
4061	39.33	39.83	22.04	31.65	33.52	5.504	6.051	5.13	4.54	4.735	5.17
4062	38.46	41.6	26.5	35.33	35.6	5.517	5.956	5.655	5.308	4.973	5.581
4063	42.74	43.91	28.45	34.7	38.33	5.666	5.997	5.423	5.151	5.086	5.518
4064	37.78	44.56	26.14	28.06	33.75	5.527	5.979	4.733	4.625	4.814	5.076
4065	41.6	43.43	28.08	33.81	37.8	5.672	6.122	5.461	5.296	5.059	5.657
4066	42.77	42.05	25.06	33.96	37.04	5.997	6.224	5.456	5.423	5.383	5.877
4067	37.88	38.65	24.32	29.15	32.03	5.243	5.973	4.594	4.557	4.21	4.757
4068	42.68	46.71	37.65	39.73	42.89	5.692	6.565	6.416	5.686	5.28	6.189
4069	40	40.37	27.69	34.08	36.12	5.547	6.09	5.133	4.793	4.941	5.313
4070	41.03	43.59	29.11	35.1	37.89	5.754	6.185	5.352	5.316	5.206	5.701
4071	41.38	43.3	27.34	36.96	38.43	5.779	6.27	5.644	5.387	5.183	5.839
4072	44.29	44.05	26.97	36.57	39.66	5.844	5.993	5.736	5.603	5.203	5.884
4073	42.07	41.79	28.56	32.95	37.03	5.7	6.062	5.297	5.35	5.093	5.59
4075	42.27	42.24	23.97	34.08	36.76	5.743	5.836	5.212	4.877	4.87	5.372
4076	37.69	36.78	20.95	29.71	31.06	5.679	5.543	4.499	4.807	4.651	4.939
4077	41.57	40.54	23.19	32.96	35.42	5.919	6.15	5.168	5.245	5.325	5.651
4078	37.66	39.37	24.68	34.16	33.88	5.34	6.245	5.127	5.153	5.003	5.384
4079	43.14	44.03	32.14	33.45	38.88	5.497	5.887	5.212	5.256	5.182	5.403
4081	39.46	39.59	26.88	34.01	35.04	5.674	6.036	5.256	4.982	4.733	5.368
4084	38.92	41.81	22.77	33.56	34.67	5.647	5.925	5.404	4.782	4.923	5.367
4085	40.71	38.11	24.95	34.38	35.2	5.75	6.121	5.461	5.098	4.974	5.581
4086	41.93	41.67	26.24	32.71	36.46	5.758	6.179	5.384	4.936	4.755	5.475
4087	43.83	39.59	23.4	34.15	36.5	5.838	6.085	4.915	4.887	5.047	5.371
4088	36.75	39.26	27.31	32.05	33.41	5.458	5.656	4.867	4.693	4.437	4.99
4089	42.61	38.61	25.34	35.21	36.55	5.552	5.698	4.671	5.015	4.751	5.15
4090	39.03	37.09	21.14	29.24	31.41	5.559	5.761	4.67	4.464	4.807	4.957
4091	39.61	42.97	28.58	38.15	38.15	5.501	5.878	5.242	5.292	4.966	5.438
4092	41.32	44.91	29.2	32.78	37.53	5.637	6.209	5.46	5.041	5.131	5.602
4093	42.93	41.11	30.71	33.79	38.05	5.741	5.947	5.43	5.159	5.155	5.586
4094	38.47	39.51	22.18	33.3	33.55	5.395	5.74	5.087	4.804	4.823	5.17
4095	38.44	37.41	20.69	30.86	31.83	5.684	6.175	4.666	4.69	4.683	5.135
4096	39.9	43.14	25.32	31.18	35.24	5.58	6.033	4.873	4.654	4.951	5.167
4097	41.38	41.12	21.29	27.85	33.19	5.813	5.891	4.383	4.387	4.82	4.964
4098	40.06	41.05	25.05	33.12	35.27	5.658	5.675	4.597	4.897	4.947	5.142
4099	42.04	41.63	24.72	31.95	35.68	5.753	6.107	5.172	4.852	5.234	5.418
4100	39.5	40.21	22.2	30.23	33.32	5.341	5.708	4.834	4.53	4.629	4.94
5001	42.42	47.09	31.97	36.43	39.98	5.775	6.414	5.271	5.192	5.128	5.507
5002	41.26	45.07	33.55	35.41	39.05	5.8	6.064	5.653	5.208	5.065	5.566
5003	40.19	39.46	25.96	34.91	35.13	5.5	5.857	5.227	5.141	5.242	5.343
5004	41.83	41.22	27.63	37.26	37.66	5.883	6.198	5.859	5.392	5.129	5.807
5005	41.06	45.61	28.49	35.58	38.18	5.486	6.165	5.054	5.157	5.152	5.366
5006	43.77	47.31	33.54	37.36	41.64	5.736	6.298	5.482	5.189	4.953	5.575
5007	41.12	42.9	25.84	34.95	36.49	5.884	6.403	5.529	5.022	5.038	5.598
5009	36.29	34.56	16.69	28.6	26.75	5.413	5.516	3.971	3.919	4.374	4.19
5010	39.55	38.57	20.21	29.31	31.47	5.532	5.928	4.488	4.082	4.791	4.725
5011	43.83	41.36	26.36	35.18	38.03	5.851	5.915	5.436	4.947	5.107	5.494
5015	44.82	45.53	29.42	36.91	40.02	5.574	6.327	5.813	4.967	5.032	5.526
5016	36.65	42.63	28.83	33.42	34.93	5.62	5.947	4.839	4.825	4.85	5.115
5017	39.45	40.11	19.86	27.56	30.89	5.635	6.068	4.807	3.941	4.413	4.732
5018	38.15	42.96	27.7	32.79	35.14	5.238	5.848	5.541	4.938	4.716	5.211
5019	41.94	43.31	25.11	31.88	35.45	5.711	6.148	4.924	4.651	4.76	5.084
5020	35.89	39.59	23	27.6	30.25	5.464	5.961	4.534	4.006	4.509	4.617
5021	34.56	35.28	18.67	25.68	26.85	5.234	5.633	3.688	3.782	4.059	4.018
5022	40.06	42.26	32.52	34.87	37.27	5.596	5.895	5.221	5.126	4.954	5.324
5023	40.77	43.86	29.2	34.82	38.02	5.833	5.927	5.146	5.02	4.715	5.336
5024	39.26	40.53	26.49	34.53	35.4	5.613	5.956	5.336	5.539	5.169	5.599
5025	41.38	44.32	27.12	34.6	37.01	5.875	6.268	5.097	5.095	5.263	5.504
5026	38.92	40.59	22.11	30.13	32.41	5.689	6.006	4.689	4.489	4.742	4.927
5027	33	37.74	17.63	28.41	27.62	5.079	5.154	3.932	4.174	4.075	4.095
5028	34.83	36.72	20.92	27.82	28.4	5.265	5.726	3.932	3.945	4.11	4.201
5029	42.78	43.75	30.4	34.25	38.12	5.919	6.195	5.001	5.017	4.984	5.328
5030	39.79	41.02	26.23	33.42	34.69	5.619	5.988	5.121	5.131	4.963	5.296
5031	37.24	40.53	23.65	29.74	31.94	5.689	5.719	4.258	4.651	4.718	4.796
5032	41.88	45.32	27.79	36.77	38.46	5.764	6.274	5.06	5.043	5.062	5.392
5033	44.27	45.81	30.55	37.22	40.48	5.786	6.398	5.499	5.212	5.234	5.632
5034	42.37	41.22	24.89	33.47	36.03	5.709	5.988	5.316	4.807	4.836	5.275
5035	40.76	39.79	24.43	31.01	33.35	5.634	6.069	4.752	4.706	4.814	5.04
5036	35.88	39.84	21.84	26.93	29.76	5.497	5.791	4.421	4.146	4.499	4.578
5037	40.09	40.94	24.19	31.13	33.86	5.403	5.733	4.847	4.508	4.77	4.865
5038	39.23	41.19	31.32	35.37	36.49	5.84	5.807	5.291	5.416	5.187	5.49
5039	40.09	41.86	20.61	29.41	32.83	5.699	5.997	4.667	4.412	4.963	4.957
5040	39.77	44.55	30.62	32.86	36.8	5.568	5.816	5.298	5.256	4.946	5.335
5041	36.97	37.39	19.88	28.17	29.56	5.215	5.432	4.531	4.227	4.642	4.56
5042	40.19	41.05	22	27.12	32.02	5.713	5.775	3.919	4.083	4.57	4.462
5043	35.47	35.07	20.08	30.01	28.76	5.163	5.191	3.834	4.024	4.186	4.085
5044	42.3	44.41	30.46	36.8	39.14	5.682	6.399	5.402	4.939	5.089	5.489
5045	43.79	42.81	34.63	40.75	41.36	5.905	6.638	5.951	5.558	5.09	5.956
5046	41.33	41.18	28.98	34.34	36.55	5.479	5.809	4.769	4.807	5.071	5.044
5047	40.7	45.24	29.11	33.24	37.22	5.788	6.092	5.28	4.767	5.06	5.338
5048	41.39	41.38	27.77	34.09	36.15	5.489	5.915	5.23	4.84	4.879	5.2
5050	39.44	42.81	27.4	32.15	35.16	5.736	6.051	5.008	4.974	4.87	5.243
5053	41.92	42.47	27.45	33.44	36.56	5.86	6.11	4.811	4.838	5.307	5.279
5054	42.49	40.1	25.53	34.86	36.12	5.754	5.873	5.183	4.649	4.965	5.207
5055	42.1	37.61	26	33.17	34.96	5.6	5.895	5.082	4.932	5.303	5.285
5056	39.66	42.25	21.37	30.9	33.05	5.471	5.637	4.352	4.652	4.788	4.695
5057	39.63	42.21	29.44	36.61	37.2	5.567	5.838	5.45	5.034	5.013	5.347
5058	41.71	43.42	26.51	34.38	36.8	5.582	5.951	4.984	4.988	5.125	5.214
5059	41.37	42.21	29.74	34.38	37.3	5.632	6.019	5.092	5.036	5.199	5.313
5060	41.8	44.1	25.76	31.35	35.92	5.758	6.281	4.819	4.998	4.951	5.275
5061	41.87	39.44	24.74	33.54	35.04	5.511	5.701	4.709	4.935	5.046	5.021
5064	38.1	37.2	20.42	31.75	30.9	5.341	5.533	4.512	4.527	4.435	4.603
5065	41.42	42.39	32.58	38.18	38.99	5.856	6.168	5.543	5.46	5.136	5.67
5066	44.49	45.91	38.02	40.39	43.1	5.868	6.701	6.157	5.799	5.377	6.133
5067	38.75	37.35	24.9	33.63	33.2	5.408	5.879	4.725	4.874	4.662	4.978
5069	38.84	37.82	22.87	30.13	30.62	5.555	5.539	3.953	4.329	4.429	4.237
5070	41.05	44	30.39	29.83	35.94	5.694	6.194	5.049	4.914	4.875	5.242
5071	44.3	41.07	22.03	33.47	36.06	5.932	6.095	4.714	5.121	5.284	5.386
5073	45.67	43.49	32.71	37.82	40.96	5.947	6.31	5.51	5.393	5.093	5.664
5074	41.28	42.91	27.42	35.59	37.1	5.773	6.016	4.933	5.127	4.822	5.266
5075	40.54	40.9	27.99	34.88	36.3	5.493	5.834	5.132	5.331	5.132	5.365
5076	37.95	41.51	26.3	30.66	33.4	5.474	6.099	5.003	4.599	4.614	4.991
5077	40.52	45.62	26.48	31.88	36.07	5.531	5.928	5.158	4.903	5.172	5.23
5078	44.47	44.6	33.7	39.43	41.92	5.793	6.45	6.023	5.647	5.151	5.946
5079	40.45	40.25	23.3	26.84	32.11	5.566	5.779	4.468	4.148	5.022	4.719
5080	45.72	44.36	35.25	41.11	43.34	5.939	6.108	5.802	5.815	5.204	5.94
5081	42.55	42.48	32	37.03	38.85	5.721	6.127	5.335	5.372	5.021	5.492
5082	37.97	39.58	22.94	31.22	32.38	5.432	5.859	4.424	4.418	4.363	4.693
5083	37.72	36.54	25.78	31.46	32.11	5.44	5.464	4.935	4.546	4.935	4.893
5084	37.33	39.02	23.65	32.77	31.75	5.523	5.856	5.047	4.918	4.661	5.069
5086	38.4	36.09	17.39	30.85	30.18	5.394	5.789	4.353	4.002	4.423	4.496
5087	41.64	40.64	27.97	34.75	36.27	5.543	5.864	5.066	4.977	5.158	5.222
5088	38.5	43.63	27.5	33.83	35.81	5.588	5.632	4.971	5.062	4.928	5.145
5089	41.15	40.9	29.89	33.18	36.39	5.72	6.184	5.319	4.659	4.782	5.268
5090	36.14	36.71	21.39	26.74	28.92	5.472	5.549	4.32	3.997	4.821	4.53
5091	42.26	45.71	29.56	37.12	39.54	5.751	6.253	5.729	5.278	5.112	5.668
5092	36.79	35.85	18.14	29.08	29.25	5.409	5.635	4.241	4.172	4.366	4.511
5093	42.1	44.03	31.23	35.85	38.87	5.698	6.062	5.477	4.935	4.81	5.367
5094	43.48	43.73	33.55	38.09	40.9	5.73	6.149	5.696	5.813	5.178	5.851
5095	41.22	39.02	26.09	29.63	33.55	5.534	5.82	4.99	4.66	4.932	5.046
5096	42.72	46.05	30.99	38.04	40.13	5.806	6.238	5.566	5.138	5.24	5.614
5097	39.12	44.57	28.18	31.26	35.2	5.613	5.999	4.781	4.847	5.264	5.163
5098	36.22	38.12	19.74	27.67	29.21	5.536	5.868	4.038	4.354	4.588	4.576
5099	44.76	47.58	31.15	37.98	41.52	5.835	6.305	5.583	5.285	5.314	5.695
5100	38.17	41.11	24.62	31.04	33.18	5.474	5.81	4.797	4.732	4.698	4.951

## Sheet: Darfield
HS family	DMY Spring	DMY Summer	DMY Autumn	DMY All Cuts	GS Spring	GS Late spring	GS Summer	GS Autumn	GS All Cuts
1001	33.72	30.99	48.82	36.82	5.954	6.319	5.393	4.796	5.23
1002	33.84	34.12	51.93	45.41	5.9	6.147	5.47	5.863	5.686
1003	35.44	32.18	51.07	41.51	5.669	5.942	5.025	5.481	5.25
1004	35.79	41.97	52.56	50.24	5.962	6.123	5.818	5.634	5.742
1005	34.52	41.8	47.55	51.02	5.409	5.7	4.734	4.826	4.541
1006	35.71	31.34	46.83	42.35	5.919	5.741	4.78	5.088	5.12
1007	36.69	46.68	52.01	57.47	5.871	6.249	5.577	5.625	5.631
1008	35.2	35.81	50.98	45.37	5.878	6.065	5.39	5.62	5.571
1009	33.89	31.17	48.57	42.74	5.926	5.733	4.577	5.539	5.252
1010	37.39	52.18	51.42	65.55	5.819	5.923	5.663	5.629	5.555
1100	36.08	47.16	50.77	55.75	6.082	6.574	5.861	6.02	6.03
1011	35.89	43.73	51.28	53.21	5.957	5.903	5.338	5.361	5.395
1012	36.88	50.84	53.41	59.17	6.014	6.526	6.148	5.914	6.064
1013	37.39	38.31	52.63	47.46	5.88	5.878	5.397	5.477	5.49
1014	36.12	47.79	52.62	55.02	6.033	6.253	5.569	5.325	5.605
1015	38.84	52.17	58.35	58.39	5.981	6.307	5.677	5.869	5.89
1017	36.27	47.12	53.46	53.24	5.769	6.22	5.296	5.478	5.487
1018	36.13	42.25	55.21	52.11	5.916	6.288	5.902	6.205	6.003
1019	37.39	46.82	54.63	54.6	5.938	6.364	5.813	6.282	6.037
1020	35.66	42.16	51.48	47.25	5.864	6.336	5.429	5.285	5.414
1021	37.21	49.21	52.72	56.94	5.838	6.023	5.509	5.515	5.455
1022	35.9	34.33	50.68	45.46	5.824	5.697	4.777	5.516	5.282
1023	37.02	44.8	53.99	52.94	5.754	6.031	5.625	5.874	5.664
1024	36.74	52.91	53.52	57.89	5.786	6.357	5.65	5.606	5.661
1025	34.17	30.55	45.14	39.18	5.825	5.321	4.629	5.052	4.936
1026	35.61	48.28	54.04	62.73	6.019	6.137	5.748	5.698	5.82
1027	36.13	46.79	55.22	57.86	5.963	6.423	5.836	5.78	5.817
1028	38.15	47.86	55.92	57.59	6.083	6.29	5.766	5.931	6.063
1029	33.78	33.06	49.85	44.32	5.768	6.139	5.205	5.458	5.411
1030	36.42	45.31	53.36	55.39	5.959	6.183	5.613	5.846	5.829
1031	37.13	43.33	53.09	52.23	5.98	5.995	5.471	5.524	5.628
1032	36.15	50.55	54.32	62.76	5.908	6.078	6.122	5.837	5.865
1033	34.79	33.12	49.13	42.92	5.717	5.696	5.109	5.259	5.112
1034	33.94	32.59	47.4	41.44	5.8	5.922	5.231	5.081	5.223
1035	36.15	45.17	54.25	54.73	5.724	6.403	5.903	5.512	5.655
1036	33.24	31.89	48.39	40.75	5.837	5.813	5.168	4.643	4.865
1037	37.58	49.77	54.84	55.56	5.791	6.185	5.488	5.984	5.762
1038	37.24	47.14	54.28	52.1	6.034	6.049	5.774	5.763	5.874
1039	35.43	46.5	52.48	54.62	6.095	6.223	5.634	5.757	5.854
1040	35.23	46.14	50.63	54.26	5.783	6.06	5.199	5.849	5.534
1041	35.7	32.99	46.36	44.77	6.04	5.763	4.885	5.462	5.421
1042	36.97	49.1	55.46	57.97	5.853	6.098	5.994	5.714	5.794
1044	36.28	49.32	51.2	60.22	5.933	6.066	5.248	5.519	5.515
1045	38.14	47.22	52.45	54.12	5.886	6.018	5.386	5.386	5.381
1046	37.93	53.55	56.5	64.77	5.956	6.378	5.824	5.851	5.889
1047	36.57	44.82	52.24	56.48	5.92	6.347	5.833	5.576	5.844
1048	36.98	43.1	50.39	52.38	5.651	6.183	5.233	5.447	5.27
1049	35.08	50.43	53.14	59.26	5.772	6.156	5.687	5.393	5.479
1050	34.83	45.18	50.32	55.8	5.782	6.356	5.587	5.439	5.541
1051	35.6	37.01	52.3	45.91	5.941	6.117	5.635	5.818	5.793
1052	35.28	38.24	50.67	48.89	6.06	6.64	5.507	5.258	5.634
1053	37.1	43.09	52.58	56.23	5.992	6.098	5.547	5.594	5.628
1054	36.75	44.99	54.6	56.33	5.963	6.652	5.841	5.911	6.033
1055	36.15	42.77	50.74	53.05	5.757	6.097	5.485	5.213	5.303
1056	35.64	29.53	46.83	39.67	6.011	6.123	5.239	5.041	5.293
1057	35.06	33.17	50.13	43.88	5.957	6.08	4.853	5.095	5.228
1058	36.51	44.34	55.25	54.43	6.011	6.183	5.431	6.131	5.885
1059	37.6	47.27	54.88	54.03	5.872	6.196	5.986	6.163	5.949
1060	35.46	51.59	52.15	59.31	5.916	6.498	5.703	5.961	5.882
1061	35.95	41.9	49.43	50.21	6.009	5.99	5.393	5.307	5.465
1062	35.07	37.65	49.13	49.8	5.853	5.756	5.358	5.324	5.32
1063	35.15	33.99	50.36	42.11	5.859	6.048	5.607	5.594	5.581
1064	35.24	31.27	50.33	40.9	5.884	6.334	5.215	5.427	5.477
1065	37.42	48.92	51.24	58.67	5.577	5.96	5.107	6.12	5.509
1066	34.97	34.64	51.87	41.86	5.595	5.865	5.113	5.6	5.243
1067	36.32	45.66	53.39	55.32	5.747	6.013	5.633	5.568	5.461
1068	37.1	41.66	52.63	50.78	5.83	6.276	5.712	5.552	5.644
1069	38.18	45.62	55.98	52.4	5.971	6.384	5.481	5.748	5.861
1070	37.65	48.99	61.43	58.51	6.054	6.433	6.32	6.129	6.267
1071	37.93	41.84	54.11	50.52	5.839	6.068	5.688	5.681	5.583
1072	35.59	46.51	52.91	56	5.897	6.084	5.525	5.713	5.633
1073	34.91	31.41	48.33	39.18	6.079	5.985	4.727	5.726	5.438
1074	35.54	31	49.97	42.08	5.811	5.54	4.758	5.189	5.122
1075	37.02	53.83	51.25	59.58	5.803	6.318	5.679	5.65	5.707
1076	34.71	33.32	45.47	44.88	5.927	6.031	5.462	5.387	5.43
1077	36.87	44.1	51	54.93	5.961	6.159	5.662	5.338	5.521
1078	36.46	46.2	55.75	55.8	5.898	6.31	5.411	6.119	5.811
1079	35.44	43.73	53.08	52.45	5.693	6.039	5.275	5.511	5.428
1080	35.95	42.63	52.55	53.19	5.761	6.48	6.148	5.024	5.481
1081	37.22	46.87	54.89	55.01	5.986	6.306	6.009	5.231	5.72
1082	35.87	41.96	48.94	52.74	5.816	5.851	5.324	4.847	5.058
1083	37.13	47.27	49.95	54.52	5.797	6.252	5.22	5.304	5.44
1084	34.87	36.81	49.58	44.23	5.957	5.967	5.295	5.286	5.438
1085	36.41	34.15	50.54	43.69	6.065	6.115	4.962	5.733	5.568
1086	36.66	35.55	49.38	43.07	5.779	5.682	5.256	5.045	5.159
1087	37.16	49.99	55.94	60.71	5.807	6.113	5.374	5.966	5.701
1089	35.99	38.94	53.67	45.98	5.833	6.193	5.872	5.487	5.65
1090	35.51	44.07	52.34	52.94	5.729	6.106	5.529	5.896	5.679
1091	36.27	46.58	52.4	58.24	6.107	6.266	5.505	5.537	5.684
1092	36.36	48.95	49.18	59.27	5.887	5.826	5.23	5.346	5.423
1093	35.48	32.13	51	40.3	5.904	5.985	5.08	5.902	5.644
1094	36.94	46.32	51.34	52.12	5.779	5.981	5.156	5.184	5.234
1095	35.34	33.81	54.36	42.27	5.757	6.018	5.516	5.316	5.447
1096	35.2	35.82	52.44	43.2	5.897	6.151	5.302	5.458	5.483
1097	35.81	46.19	55.4	50.18	5.955	6.297	6.124	5.839	5.989
1098	35.98	43.37	49.4	54.04	5.648	5.669	5.113	5.394	5.15
1099	36.08	44.33	53.77	51.11	5.769	6.221	5.809	5.73	5.728
2001	36.69	45.5	53.06	53.54	5.839	6.252	5.423	5.348	5.469
2005	36.62	46.71	52.69	55.37	5.896	6.3	5.808	5.537	5.789
2006	36.07	41.35	53.18	50.1	6.037	6.322	5.733	5.532	5.792
2008	37.24	40.93	51.5	47.92	5.765	6.104	5.335	5.611	5.573
2009	37.86	44.03	56.98	54.54	5.735	6.097	5.341	5.847	5.678
2010	35.35	42.85	50.4	47.45	5.859	5.972	5.361	5.569	5.55
2100	35.38	40.4	52.65	49.57	5.925	6.125	5.676	5.442	5.606
2011	36.26	43.44	52.06	51.93	6.044	6.221	6.023	5.323	5.713
2013	35.82	48.42	51.54	56.26	5.945	6.146	5.57	5.635	5.732
2014	35.7	38.76	51.88	49.32	5.861	6.113	5.408	5.494	5.544
2015	34.18	43.92	49.81	50.66	5.873	6.022	5.723	5.559	5.606
2016	35.01	35.4	50.16	47.07	5.735	5.783	5.472	5.171	5.254
2017	35.11	42.07	53.72	50.09	5.898	6.175	5.753	5.645	5.85
2018	35.34	47.87	52.91	59.7	5.878	6.143	5.657	5.523	5.613
2019	35.19	45.24	52.44	48.38	5.85	6.113	5.514	5.633	5.649
2020	35.14	41.69	46.75	46.35	5.934	5.987	5.005	5.539	5.347
2022	34.67	42.07	50.16	49.72	5.694	5.776	5.381	5.699	5.412
2023	34.62	41.63	52.19	50.53	5.953	6.222	5.668	5.541	5.695
2024	36.66	46.52	49.38	55.34	5.553	6.046	5.495	5.517	5.361
2025	35.53	43.43	51.89	53.82	5.872	6.129	5.51	5.719	5.704
2026	36.27	41.88	50.26	49.17	5.886	5.751	5.396	5.676	5.608
2027	34.67	41.54	50.35	48.19	5.913	6.293	5.524	5.232	5.491
2028	35.69	46.84	55.09	55.38	5.875	6.098	5.722	5.984	5.858
2029	36.07	46.5	54.57	54.53	5.883	6.493	5.699	5.862	5.939
2030	36.36	42.04	55.73	50.89	5.934	6.245	5.649	5.923	6.007
2031	35.57	45.08	52.31	55.1	5.699	6.36	5.908	5.551	5.707
2032	35.92	44.88	50.97	53.07	5.933	6.25	5.875	5.644	5.73
2033	34.97	40.62	51.26	46.5	5.684	5.981	5.06	5.232	5.207
2034	35.82	48.13	51.62	58.35	6.065	6.272	5.951	5.705	5.865
2036	36.41	41.59	52.04	52.58	5.91	6.132	5.548	5.445	5.593
2037	36.47	42.7	50.4	49.14	5.936	6.03	5.538	5.642	5.606
2038	35.87	46.11	53.28	55.35	5.917	6.196	5.483	5.98	5.823
2039	34.36	43.08	49.46	50.63	5.683	6.192	5.391	5.502	5.391
2040	36.94	42.6	54.28	50.94	5.771	6.391	5.909	5.377	5.685
2041	36.49	43.39	52.55	53.04	5.83	6.267	5.686	5.84	5.799
2042	35.35	36.6	50.46	45.21	5.898	6.531	5.693	5.587	5.744
2043	36.49	41.77	52.31	50.14	5.842	6.221	5.707	5.395	5.682
2045	36.42	43.24	55.13	48.95	5.847	6.233	5.799	5.784	5.794
2046	37.08	44.94	53.03	55.82	5.873	6.152	5.543	5.853	5.765
2047	36.36	40.95	52.86	48.97	5.972	6.118	5.526	5.762	5.708
2048	36.73	49.49	53.71	57.38	5.977	6.228	5.725	5.622	5.795
2049	34.71	28.85	47.12	35.93	5.959	6.041	4.836	5.034	5.181
2050	36.57	44.67	50.56	51.96	5.825	6.28	5.703	5.629	5.704
2051	35.67	43.35	49.95	54.36	5.729	6.071	5.475	5.326	5.381
2052	35.63	36.44	50.5	44.33	5.835	5.854	5.076	5.55	5.457
2053	36.42	44.67	55.23	50.38	5.967	6.367	5.856	5.77	5.909
2055	36.01	48.89	51.99	58.84	5.652	5.937	5.022	5.641	5.363
2056	35.18	38.94	53.58	48.25	5.804	6.374	5.805	5.386	5.677
2057	36.19	41.54	52.28	53.51	5.992	6.127	5.449	5.62	5.714
2058	34.5	38.78	53.03	44.5	5.692	6.369	5.619	5.692	5.665
2059	35.16	46.94	55.09	54.64	6.035	6.064	5.552	5.877	5.798
2060	36.99	43.4	53.77	48.28	5.92	6.316	5.66	5.819	5.817
2061	35.66	39.88	49.64	48.23	5.816	6.085	5.33	5.558	5.509
2062	33.8	39.48	50.75	46.63	5.655	5.892	5.481	5.454	5.385
2063	35.58	33.79	50.36	40.49	5.955	5.875	5.28	5.496	5.58
2065	35.49	38.13	49.57	48.34	5.595	5.735	5.224	5.333	5.132
2066	37.74	52.48	55.61	58.68	5.951	6.294	5.78	5.546	5.719
2068	37.43	50.79	52.63	59.74	5.867	6.412	5.758	5.199	5.601
2069	35.31	39.79	51.52	46.65	6.003	6.131	5.644	5.893	5.829
2070	36.3	48.87	51.43	58.21	6.106	6.179	5.957	5.436	5.761
2071	34.53	36.49	52.39	48.17	5.807	5.881	5.145	5.747	5.489
2072	35.03	43.31	52.14	54.21	5.859	5.912	5.554	5.645	5.639
2073	35.95	48.64	51.85	58.36	6.036	6.291	5.892	5.613	5.799
2074	33.73	43.44	49.44	55.14	5.636	6.262	5.545	5.501	5.432
2075	36.14	44.41	54.72	50.6	6.01	6.144	5.554	5.58	5.657
2076	36.06	38.84	55.42	47.14	5.916	6.315	5.584	5.577	5.763
2077	35.8	43.77	50.32	55.14	5.877	5.885	5.261	5.151	5.322
2078	35.49	42.38	51.92	48.8	5.814	6.324	5.586	5.486	5.585
2079	36.71	46.65	52.74	53.85	5.958	6.17	5.684	5.528	5.651
2080	35.56	47.57	52.96	58.68	6.015	6.214	5.647	5.473	5.611
2081	36.4	46.88	52.38	54.65	6.134	6.093	5.474	5.623	5.811
2082	35.46	44.56	49.24	50.85	5.814	5.902	5.564	5.148	5.339
2083	36.19	41.31	53.29	49.97	6.036	6.279	5.447	5.529	5.716
2085	36.03	45.63	54.36	52.9	5.919	6.252	5.851	5.493	5.73
2086	35.59	45.01	52.62	52.63	5.908	6.158	5.331	6.061	5.777
2087	37.09	42.71	52.84	50.96	6.058	6.115	5.749	5.723	5.783
2088	36.25	41.83	51.39	51.23	5.887	6.247	5.493	5.589	5.671
2089	34.91	37.61	49.09	41.67	5.845	6.089	5.504	5.385	5.495
2090	35.06	48.81	51.96	55.16	5.96	6.303	6.064	5.797	5.922
2091	36.02	32.99	50.06	40.31	5.915	6.154	5.139	5.317	5.501
2092	35.92	50.07	57.18	57.04	6.065	6.504	5.851	5.629	5.991
2093	36.13	50.68	55.42	60.54	5.979	5.822	5.754	6.098	5.986
2095	34.32	42.23	47.6	49.72	5.887	6.488	5.728	5.511	5.676
2097	36.76	53.38	57.94	64.5	5.951	6.355	5.866	6.158	6.038
2098	35.44	40.08	49.87	49.13	5.855	6.059	5.315	5.69	5.582
2099	38.27	50.49	51.82	54.74	6.077	6.001	5.307	6.039	5.759
3001	38.03	47.96	55.78	55.12	6.09	6.192	5.799	5.749	5.915
3002	35.08	46.32	51.61	52.92	5.865	6.142	5.401	5.349	5.481
3003	36.11	46.11	54.57	50.52	5.932	6.225	5.965	5.391	5.829
3004	37.52	52.61	58.44	56.24	6.012	6.745	6.117	6.016	6.263
3005	36.61	45.65	52.97	53.6	5.967	5.972	5.765	6.029	5.946
3006	34.98	38.8	49.49	43.17	5.857	5.984	5.223	5.693	5.491
3007	37.18	44.72	54.06	52.93	5.863	6.107	5.349	5.763	5.667
3008	34.18	28.98	45.56	36.13	5.872	5.851	4.852	5.029	5.149
3009	36.84	48.51	52.26	57.9	5.888	6.38	6.068	6.2	6.204
3010	37.4	45.09	54.09	49.49	6.044	6.338	5.955	5.69	5.937
3100	37.04	44.45	57.18	52.27	5.975	6.205	5.719	5.751	5.899
3011	37.87	49.37	55.19	55.65	5.986	6.467	5.912	5.584	5.957
3012	34.72	48.4	48.91	53.93	5.68	5.713	5.096	4.933	4.727
3013	37.16	46.32	55.78	50.47	5.946	6.121	5.75	6.018	5.933
3014	35.34	46.4	50.97	57.04	5.814	5.826	5.398	5.371	5.414
3015	36.35	49.41	55.9	56.43	5.978	6.219	5.692	5.558	5.765
3016	35.73	51.62	55.38	59.56	5.901	6.176	5.727	5.664	5.827
3017	35.22	41.75	52.29	50.46	5.718	6.22	5.608	6.142	5.741
3018	36.48	47.18	52.97	54.13	5.784	6.137	5.506	5.928	5.729
3019	35.82	47.92	50.41	54.93	5.978	5.989	5.289	5.372	5.508
3020	36.88	49.57	53.31	57.86	6.041	6.343	5.81	5.436	5.812
3021	35.4	42.31	50.83	50.97	5.665	6.312	5.637	5.352	5.507
3022	35.3	40.74	51.15	49.91	5.98	6.345	5.496	5.564	5.764
3023	35.22	42.8	51.26	49.8	5.779	5.795	5.333	5.442	5.371
3024	36.27	46.17	50.83	56.36	5.934	6.219	5.636	5.594	5.793
3025	37.01	48.41	54.46	55.99	5.961	5.962	5.698	5.817	5.832
3026	37.25	46.6	54.6	49.36	5.824	6.244	5.851	5.626	5.817
3027	34.02	37.32	45.3	47.44	5.85	5.769	5.068	5.181	5.14
3028	35.41	46.09	50.13	53.12	6.001	6.201	5.519	5.439	5.685
3029	34.8	42.38	50.34	52.38	5.626	6.011	5.275	5.5	5.432
3030	36.46	51.16	53.75	59.9	5.931	6.208	5.715	5.8	5.866
3031	36.02	49.13	55.55	55.37	5.998	6.288	5.785	5.999	6.012
3032	35.96	45.47	55.55	51.21	5.738	5.82	5.399	5.62	5.588
3033	36.76	39.65	50.72	50.67	5.971	6.301	5.568	5.233	5.598
3034	37.63	42.85	54.88	51.62	6.148	6.292	5.844	5.796	6.073
3035	36.1	47.3	52.26	55.7	5.935	6.162	5.512	5.865	5.824
3036	37.38	43.64	57.06	50.5	6.044	5.767	5.781	6.016	5.988
3037	34.67	42.4	52.46	51.59	5.903	5.967	5.51	5.555	5.618
3038	35.23	51.35	54.86	60.06	5.788	6.084	5.711	5.783	5.814
3039	36.08	43.71	49.85	53.07	5.88	6.486	5.692	5.297	5.606
3040	36.69	47.05	56.08	53.82	6.038	6.397	5.928	5.594	5.961
3041	35.17	44.21	52.47	51.63	5.831	6.35	5.711	5.399	5.68
3042	34.48	41.95	50.23	50.75	5.671	6.026	5.476	5.298	5.415
3043	35.64	40.45	53.41	46.63	5.796	6.37	5.483	5.363	5.639
3044	36.09	43.28	52.56	52.26	5.859	6.068	5.619	5.831	5.84
3045	35.57	45.56	50.52	51.32	5.75	5.99	5.47	5.179	5.4
3046	37.38	52.12	60.4	57.89	5.992	6.403	5.916	6.488	6.33
3047	36.5	49.89	55.17	52.23	5.895	6.13	5.717	5.548	5.643
3048	35.19	47.69	54.72	54.57	5.994	6.224	5.821	5.678	5.869
3049	35.91	45.83	53.15	53.99	5.93	5.956	5.797	5.758	5.905
3050	35.32	52.18	55.17	62.87	5.945	6.472	5.997	5.638	5.945
3051	36.94	48.88	54.54	58.25	5.997	6.177	5.95	5.995	6
3052	37.12	51	56.66	59.95	6.014	6.23	6.201	6.128	6.202
3053	37.99	45.39	56.24	55.28	6.153	6.429	6.048	5.998	6.292
3054	36.17	49.38	53.21	55.51	5.955	6.373	5.629	5.345	5.692
3055	36.77	46.95	51.42	56.33	5.763	6.14	5.739	5.589	5.709
3056	35.22	37.02	49.65	44.44	5.707	5.659	5.541	5.684	5.511
3057	35.48	39.96	51.03	50.02	5.802	5.902	5.297	5.505	5.524
3058	36.66	46.01	55.08	54.26	5.878	6.16	5.796	6.248	6.117
3059	36.11	39.29	50.71	49.49	5.914	5.989	5.389	5.479	5.59
3060	35.91	45.87	52.12	52.8	5.853	6.129	5.751	5.778	5.818
3061	34.35	36.81	47.91	47.13	5.871	6.08	5.293	5.597	5.616
3062	36.69	42.61	55.09	53.79	6.003	6.2	5.769	5.758	5.894
3063	35.52	46.7	51.69	55.37	5.913	6.129	5.578	5.27	5.577
3064	35.49	47.99	53.46	57.93	5.793	6.266	5.735	6.181	6.007
3065	36.79	49.77	56.68	56.06	5.784	6.376	5.617	6.033	5.903
3066	39.84	51.87	57.93	58.85	5.872	6.096	5.754	5.79	5.909
3067	36.77	45.22	53.56	49.35	5.972	6.446	5.942	5.424	5.84
3068	37.21	43.13	51.25	50.59	5.861	6.227	5.587	5.576	5.619
3069	35.86	40.29	48.2	48.82	5.992	6.025	5.383	5.485	5.683
3070	37.24	48.51	55.13	54.91	5.901	6.318	5.745	5.898	5.966
3071	36.6	47.69	54.91	54.1	5.902	6.335	5.566	5.422	5.733
3072	37.07	41.28	52.05	52.89	5.968	6.118	5.227	5.508	5.665
3073	35.72	40.03	49.92	46.85	5.978	6.266	5.721	5.858	5.936
3074	37.32	50.59	55.02	57.42	5.943	6.213	6.012	5.992	5.963
3075	35.25	39.49	50.61	46.06	5.733	5.951	5.272	5.683	5.545
3076	36.78	45.65	53.1	53.98	5.871	6.249	5.495	5.4	5.662
3077	35.52	43.11	52.19	52.24	5.986	6.205	5.336	5.566	5.707
3078	35.18	41.95	52.01	55.34	5.959	6.253	5.294	5.326	5.573
3079	34.88	43.85	53.2	49.05	6.026	6.165	5.754	5.526	5.797
3080	36.91	45.17	52.04	53.27	5.88	6.092	5.512	5.595	5.695
3082	36.31	52.01	55.7	59.25	6.014	6.201	5.917	6.085	6.102
3083	35.79	40.83	52.01	50.02	6.018	6.271	5.658	5.713	5.87
3084	36.53	40.42	51.15	48.78	5.929	5.992	5.223	5.806	5.726
3085	37.1	42.74	50.09	51.14	5.742	6.095	5.65	5.405	5.563
3087	35.58	43.6	52.33	52	5.83	6.149	5.549	5.624	5.657
3088	36.03	51.97	55.6	58.32	5.889	6.251	5.818	5.759	5.915
3089	35.1	42.96	54.05	49.9	5.906	5.992	5.506	5.591	5.672
3090	36.85	44.46	52.94	52.15	5.96	6.057	5.767	5.686	5.82
3091	35.51	42.52	51.1	52.14	5.892	6.2	5.785	5.633	5.703
3092	36.25	46.8	55.74	53.19	5.957	6.311	5.99	5.753	6.013
3093	36.53	47.41	51.78	55.43	5.897	6.123	5.437	5.706	5.72
3094	34.88	43.6	53.61	51.09	6.025	6.339	5.894	5.873	5.994
3095	36.91	47.41	55.86	55.74	5.842	6.342	5.623	5.528	5.769
3096	38.61	46.75	60.44	51.46	5.953	6.295	5.964	5.829	6.11
3097	35.97	51.29	52.9	55.54	5.848	6.616	5.61	5.642	5.813
3098	37.76	39.86	53.96	44.05	6.009	6.476	5.775	5.702	5.92
3099	36.25	43.65	53.11	52.93	6.028	6.028	5.601	5.374	5.713
4001	36.08	51.07	53.85	60.91	5.912	6.504	5.717	5.632	5.722
4002	34.08	33.28	48.88	40.04	5.817	6.298	5.292	5.201	5.393
4003	35.5	46.86	55.11	55.2	5.68	6.156	5.755	5.622	5.633
4004	35.2	50.96	53.05	60.53	5.965	6.685	5.9	5.657	5.863
4005	37.63	40.22	53.08	48.61	5.862	6.268	5.342	5.845	5.739
4006	35.2	35.56	51.23	44.46	6.005	6.276	5.66	5.649	5.806
4007	35.33	47.06	53.69	57.11	5.793	6.58	5.606	5.504	5.614
4008	34.35	46.39	47.19	55.56	5.863	5.72	4.991	5.091	5.04
4009	37.31	37.86	53.28	48.43	6.023	5.971	5.712	5.577	5.801
4010	36.66	46.88	52.47	56.01	5.967	6.168	5.612	5.382	5.634
4100	34.27	33.91	48.29	41.97	5.857	6.018	5.269	4.979	5.258
4011	36.83	42.45	53.71	53.25	6.039	6.593	5.493	5.917	5.984
4012	37.9	42.95	52	55.19	5.928	5.964	5.157	5.171	5.33
4013	35.66	37.96	52.04	49.15	5.903	6.528	5.386	5.647	5.685
4014	36.38	41.06	54.31	49.6	5.846	6.38	5.782	5.912	5.915
4015	39.38	50.24	54.81	59.24	5.829	6.304	5.642	5.893	5.833
4016	37.69	51.89	54.87	60.99	5.856	6.47	5.98	5.953	5.946
4017	35.8	41.22	51.12	54.03	6.059	5.965	5.45	5.468	5.659
4018	34.23	41.31	48.47	52.06	5.867	6.213	5.436	5.475	5.541
4019	38.69	43.85	54.82	53.84	6.018	6.488	6.015	5.81	6.048
4020	37.21	42.63	51.01	52.29	5.998	6.025	5.416	5.459	5.605
4022	36.15	40.38	53.76	51.21	6.008	6.063	5.571	5.821	5.805
4023	36.43	43.59	55.61	52.87	5.81	6.282	5.579	5.704	5.707
4024	35.45	39.02	52.18	46.76	5.925	6.256	5.214	5.183	5.461
4025	36.04	44.64	53.14	58.53	6.112	6.133	5.801	5.695	5.962
4026	33.91	34.82	49.86	45.7	5.826	6.19	5.011	5.198	5.268
4027	35.48	39.45	50.82	46.2	5.708	6.397	5.357	5.356	5.41
4028	36.25	44.59	47.67	53.89	6.116	6.718	5.76	5.215	5.735
4029	34.65	38.98	52.93	47.09	5.788	6.279	5.068	5.544	5.419
4030	36.8	43.72	54.78	54.95	6.027	6.475	6.034	5.819	6.072
4031	35.82	36.87	48.84	48.96	5.883	5.844	4.834	5.219	5.2
4032	34.7	34.99	48.37	46.36	5.92	5.769	5.206	5.546	5.472
4033	36.82	41.8	45.61	51.66	5.63	5.937	5.135	5.043	5.076
4035	38.38	46.13	53.74	58.15	6.034	6.255	6.121	5.835	6.074
4036	36.58	39.68	54.61	48.69	6.069	6.552	5.951	5.912	6.163
4037	35.16	35.5	51.45	42.55	5.887	6.081	5.298	5.624	5.593
4038	37.22	40.97	53.81	49.05	5.974	6.311	5.75	5.649	5.856
4040	35.97	35.33	54.84	47.99	5.951	6.24	5.737	5.964	5.961
4041	35.25	38.75	47.88	47.66	5.765	5.916	5.006	5.238	5.239
4043	35.71	38.14	52.06	48.04	6.108	6.538	6.258	5.783	6.16
4044	35.64	40.02	55.93	51.87	5.794	5.823	5.58	5.824	5.756
4045	34.54	33.39	54.32	44.49	5.814	5.961	5.401	5.597	5.572
4046	35.61	44.35	55.54	54.36	5.822	6.597	5.93	5.692	5.905
4047	35.02	38.47	47.23	48.61	5.607	5.856	4.72	5.236	5.012
4048	36.97	32.87	52.06	45.15	5.973	5.677	5.267	5.552	5.488
4050	35.79	38.71	51.87	46.53	5.742	6.099	5.576	5.737	5.554
4051	34.57	42.51	52.67	53.45	6.013	6.076	5.342	5.522	5.615
4052	35.71	51.49	51.53	61.64	5.82	6.457	5.692	5.737	5.674
4053	35.57	38.03	49.88	50.86	5.91	6.208	5.61	5.816	5.94
4055	35.58	30.83	47.64	39.53	5.695	6.16	5.409	5.036	5.418
4056	36.71	43.38	57.97	56.14	5.98	6.398	6.125	6.123	6.179
4057	33.47	34.86	50.69	44.59	5.815	6.133	5.113	5.288	5.31
4058	35.72	48.02	54.26	56.97	5.84	5.965	5.536	5.911	5.8
4059	36.51	34.87	51.47	46.33	6.036	6.17	5.321	5.52	5.639
4060	36.37	40.53	53.88	48.63	5.626	6.208	5.378	5.718	5.546
4061	35.8	35.92	52	45.21	5.993	6.286	5.698	5.581	5.827
4062	34.88	37.68	54.07	49.4	5.823	6.24	5.765	5.701	5.759
4063	36.47	41.31	50.72	50.34	5.958	6.208	5.509	5.483	5.638
4064	34.44	42.21	44.09	47.75	5.892	6.129	5.039	4.923	5.145
4065	35.86	40.3	52.15	49	5.916	6.511	5.819	5.64	5.811
4066	36.96	39.2	53.84	48.29	6.159	6.017	5.734	5.992	6.067
4067	35.46	41.27	48.51	50.97	5.811	6.364	5.384	5.239	5.366
4068	37.07	54.31	56.53	62.95	5.975	6.644	6.444	5.786	6.113
4069	36.01	43.2	53.56	54.14	5.894	6.408	5.656	5.417	5.75
4070	35.77	41.71	54	50.82	5.84	6.198	5.602	5.731	5.789
4071	35.6	39.45	53.5	49.08	5.897	6.404	5.856	5.641	5.924
4072	37.1	39.24	52.02	50.59	5.991	6.215	5.615	5.73	5.811
4073	37.89	42.95	51.77	54.25	5.887	6.356	5.684	5.723	5.789
4075	37.18	37.76	53.84	43.13	5.962	5.871	5.295	5.507	5.574
4076	34.55	33.08	51.15	44.19	6.12	5.606	5.244	5.978	5.699
4077	35.3	33.89	51.62	43.37	6.06	6.187	5.426	5.771	5.843
4079	36.18	45.11	51.4	55.96	5.728	5.965	5.602	5.67	5.556
4081	34.48	41.53	53.38	51.33	5.784	6.127	5.378	5.201	5.28
4084	35.89	36.68	52.94	47.49	6.102	6.226	5.852	5.61	5.873
4085	34.2	36.27	52.83	47.95	5.807	6.142	5.515	5.348	5.457
4086	33.05	37.35	50.92	48.02	5.875	6.122	5.48	5.316	5.468
4087	37.21	35.25	53.77	45.37	6.034	6.118	5.289	5.718	5.762
4088	33.26	41.34	50.6	53.89	5.803	5.828	4.978	5.397	5.248
4089	37.09	34.6	52.98	50.24	5.873	5.669	4.641	5.803	5.429
4090	36.66	34.1	49.44	48.41	5.82	5.817	5.245	5.636	5.531
4091	36.52	43.13	55.34	54.25	5.722	5.936	5.404	5.38	5.416
4092	36.77	46.08	51.45	56.28	5.909	6.251	5.826	5.541	5.742
4093	36.42	45.64	51.87	57.09	5.837	6.089	5.349	5.559	5.542
4094	35.7	34.86	52.16	43.53	5.915	6.183	5.735	5.608	5.806
4095	35.48	32.5	51.39	43.58	5.901	6.352	5.122	5.531	5.59
4096	37.01	39.1	50.86	49.71	5.985	6.188	5.194	5.171	5.46
4097	35.84	33.41	47.78	42.53	6.06	5.91	5.044	5.429	5.469
4098	36.2	41.18	53.81	51.37	5.993	6.117	5.344	5.783	5.818
4099	36.76	37.99	50.72	45.55	5.892	6.38	5.385	5.675	5.652
5001	37.53	52.96	56.67	60.41	5.929	6.58	5.929	5.831	5.911
5002	35.43	51.18	53.9	61.74	5.977	6.312	5.874	5.844	5.921
5003	34.23	41.95	52.23	51.48	5.717	5.965	5.493	5.475	5.487
5004	35.51	41.41	56.77	53.31	5.938	6.067	5.996	5.848	5.917
5005	36.59	42.47	54.23	54.5	5.871	6.179	5.456	6.084	5.933
5006	37.27	50.72	55.39	57.69	5.887	6.361	5.739	5.294	5.65
5007	35.78	41.87	53.78	53.1	5.969	6.383	5.776	5.482	5.686
5009	35.98	29.69	51.87	43.04	5.973	5.853	4.864	5.34	5.288
5010	36.48	34.63	50.15	45.19	5.881	6.124	5.254	5.083	5.384
5100	36.11	39.5	50.29	49.6	6.08	6.15629	5.543	5.902	5.509
5011	37.5	40.77	54.81	52.01	5.867	5.895	5.694	5.529	5.658
5015	35.78	43.37	52.25	52.43	5.711	6.127	5.762	5.117	5.433
5016	34.84	44.39	52.8	59.44	5.943	6.042	5.495	5.549	5.688
5017	34.65	33.89	48.38	46.18	6.056	6.573	5.539	5.381	5.675
5018	33.96	39.46	47.35	47.2	5.699	6.131	5.907	5.12	5.381
5019	36.96	40.35	50.67	47.81	5.933	6.503	5.426	5.431	5.559
5020	34.68	38.38	49.24	54.03	5.866	6.467	5.424	5.156	5.452
5021	34.63	33.86	48	45.93	6.048	6.248	5.098	5.475	5.485
5022	36.38	49.25	54.16	56.35	5.963	6.279	5.59	5.853	5.832
5023	34.72	40.65	52.9	53.93	6.007	6.032	5.556	5.357	5.528
5024	34.93	37.67	53.06	49.44	5.765	6.104	5.522	5.799	5.75
5025	36.77	41.24	52.71	49.03	6.007	6.58	5.33	5.899	5.908
5026	34.64	35.02	51.19	46.39	5.876	6.202	5.152	5.577	5.475
5027	34.69	31.24	50.92	39.59	5.87	5.807	4.903	5.789	5.386
5028	35.22	36.12	50.16	47.61	5.996	6.347	5.279	5.494	5.58
5029	36.82	48.15	52.8	58.55	6.045	6.253	5.453	5.599	5.677
5030	34.82	42.64	53.38	53.03	5.821	6.344	5.832	5.927	5.891
5031	34.56	37.97	51.17	48.32	5.919	6.082	5.149	5.635	5.576
5032	37.59	42.53	55.93	49.41	5.984	6.216	5.661	5.642	5.815
5033	37.26	47.09	55.75	53.88	5.845	6.411	5.941	5.931	5.941
5034	36.39	38.26	52.17	47.59	5.942	5.934	5.623	5.329	5.486
5036	34.14	35.07	48.03	43.87	5.769	6.148	5.112	5.483	5.369
5037	35.38	37.17	49.93	45.03	5.682	5.71	4.891	5.457	5.193
5038	35.06	43.7	52.57	52.42	5.885	6.117	5.547	5.752	5.726
5039	34.35	32.28	48.21	42.51	5.826	6.068	5.229	5.312	5.306
5040	34.67	42.79	50.14	50.4	5.584	6.254	5.464	5.464	5.317
5041	35.19	32.64	47.41	43.15	5.748	6.084	5.213	5.417	5.458
5042	35.85	36.35	48.69	48.93	6.054	6.282	4.637	5.09	5.203
5043	35.45	36.18	52.62	51.85	5.855	5.534	4.853	5.606	5.334
5044	37.38	46.76	56.23	54.76	5.962	6.386	5.829	5.364	5.776
5045	37.3	51.14	59.29	55.91	6.199	6.685	6.388	6.009	6.31
5046	36.25	45.22	54.33	58.8	5.706	6.01	5.442	5.736	5.643
5047	36.76	41.77	51.39	53.68	5.997	6.213	5.439	5.229	5.547
5048	36.33	43.95	53.87	55.51	5.77	6.191	5.606	5.611	5.58
5050	35.16	42.09	50.91	51.47	5.97	6.339	5.576	5.806	5.793
5053	36.76	43.56	53.63	51.01	6.036	6.484	5.603	5.638	5.854
5054	36.11	39.62	53.58	50.39	5.975	5.894	5.486	5.48	5.589
5055	37.55	41.45	54.66	52.41	5.883	5.951	5.776	6.122	5.996
5056	35.51	34.31	51.49	44.66	5.882	5.915	5.111	5.893	5.549
5057	36.14	46.93	56.19	58.06	5.979	6.025	5.946	6.105	6.158
5058	37.14	41.9	54.85	54.19	5.962	6.05	5.866	6.142	6.051
5059	36.91	46.6	54.25	53.47	5.968	6.171	5.797	6.176	6.11
5060	34.97	41.01	48.43	50.65	5.852	6.307	5.248	5.568	5.531
5061	36.5	37.53	52.8	47.87	5.833	5.85	5.271	5.81	5.535
5064	36.77	34.4	52.37	45.63	5.779	5.805	5.066	5.584	5.348
5065	36.13	46.69	56	56.75	5.97	6.338	5.914	5.959	5.993
5066	37.64	53.87	55.95	63.28	6.077	6.622	6.083	6.155	6.27
5067	36.36	39.76	52.3	48.8	5.818	6.082	5.24	5.514	5.513
5069	35	39.01	50.31	49.34	5.892	5.647	4.835	5.274	4.976
5070	36.36	48.02	48.02	60.41	5.865	6.379	5.61	5.453	5.562
5071	36.62	33.62	51.39	44.75	5.805	5.885	5.103	5.555	5.477
5073	36.49	45.12	54.7	52.84	5.955	5.95	5.596	5.826	5.726
5074	35.84	41.29	55.63	49.7	5.947	6.143	5.463	5.644	5.699
5075	37.27	45.57	54.52	52.66	5.792	6.125	5.932	6.319	6.098
5076	35.65	43.06	51.5	52.63	5.829	6.395	5.588	5.587	5.664
5077	35.6	41.98	49.93	49.08	5.697	5.936	5.567	5.494	5.482
5078	36.9	45.61	55.57	52.2	5.945	6.452	5.787	5.701	5.784
5079	37.17	39.27	47.83	52.53	5.862	5.841	5.249	5.497	5.474
5080	39.57	52.49	58.99	66.12	5.928	6.225	6.218	6.101	6.198
5081	36.44	48.95	55.34	56.62	5.881	6.196	5.939	5.895	5.896
5082	35.37	37.65	51.04	49.92	5.956	6.318	5.253	5.397	5.475
5083	34.32	40.54	51.98	50.69	5.876	5.823	5.415	5.556	5.533
5084	35.5	38.56	52.64	46.81	5.833	6.182	5.606	5.922	5.818
5086	35.47	28.64	52.91	39.63	5.953	6.192	5.339	5.475	5.592
5087	37.14	44.68	55.34	58.74	5.857	6.109	5.483	6.246	5.92
5088	35.3	42.27	53.25	46.87	5.854	5.803	5.537	5.718	5.584
5089	35.89	46.7	51.99	56.01	5.909	6.416	5.644	5.374	5.638
5090	33.41	34.19	45.94	43.41	5.849	5.853	4.983	5.027	5.154
5091	35.69	42.64	54.02	50.45	6.005	6.216	5.708	5.758	5.816
5092	34.56	32.26	51.28	43.55	6.028	6.167	5.452	5.544	5.712
5093	36.43	48.43	54.54	57.99	5.916	6.368	5.716	5.31	5.63
5094	37.65	50.52	55.92	55.42	5.962	6.471	6.173	6.122	6.277
5095	34.49	41.67	48.07	54.75	5.693	5.836	5.447	5.459	5.379
5096	38.29	48.07	57.92	60.84	5.924	6.246	5.932	5.895	5.989
5097	36.09	45.51	50.13	53.76	5.904	5.854	5.499	5.404	5.526
5098	35.71	34.32	49.42	46.82	6.016	6.112	4.809	5.6	5.479
5099	37.05	44.36	54.67	49.95	5.987	6.424	5.688	5.725	5.886

## Sheet: Ruakura
HS family	DMY Summer	DMY Autumn	DMY Spring	DMY Late spring	DMY All Cuts	GS Summer	GS Autumn	GS Spring	GS Late spring	GS Winter	GS All Cuts
1001	11.5	7.79	43.13	37.52	24.68	3.951	2.734	4.938	5.588	4.209	3.976
1002	11.44	9.77	40.86	34.62	23.29	4.312	2.719	4.999	5.575	4.567	4.189
1003	13.31	8.32	41.2	34.44	23.56	4.329	3.006	4.958	5.102	4.158	4.098
1004	14.58	15.68	42.11	38.04	28.32	5.229	5.13	5.642	6.147	4.999	5.486
1005	16.73	16	42.61	36.04	28.49	4.792	4.586	5.638	5.374	4.501	4.919
1006	10.94	7.53	41.83	35.1	22.98	3.338	2.365	4.939	5.124	4.178	3.568
1007	20.09	26.63	54.2	39.37	39.52	5.624	5.382	5.841	5.985	6.15	5.957
1008	9.2	7.45	38.09	31.65	19.44	3.209	2.283	4.646	4.692	4.195	3.434
1009	10.83	7.03	41.73	34.02	22.32	3.293	2.64	4.973	4.864	4.166	3.63
1010	17.4	20.02	46.75	38.76	32.51	5.297	5.549	5.512	5.924	5.905	5.713
1100	15.46	17.09	47.09	42.33	32.44	5.029	4.704	5.708	5.811	5.494	5.376
1011	14.51	15.44	43.03	34.78	27.06	4.224	3.866	5.025	4.965	4.835	4.384
1012	21.11	19.52	47.05	43.87	36.08	5.823	5.831	5.868	6.078	5.527	5.994
1013	12.81	10.86	42.37	36	25.24	4.017	2.978	5.068	4.809	4.387	3.971
1014	18.61	19.81	45.36	38.11	32.19	5.186	5.086	5.39	5.6	5.339	5.366
1015	16.79	19.66	46.37	39.25	32.43	4.994	5.171	5.463	5.458	4.91	5.203
1017	13.39	14.5	40.59	34.37	25.13	4.672	4.771	5.26	5.432	4.76	4.892
1018	17.02	19.26	46.24	37.81	31.59	5.373	5.74	5.866	5.884	5.571	5.776
1019	14.35	19.5	45.47	37.69	30.41	4.911	5.202	5.935	5.997	5.559	5.559
1020	14.52	13.63	42.44	35.32	26.71	4.918	4.161	5.66	5.684	4.929	4.948
1021	16.31	18.33	45.43	38	31.13	4.879	5.319	5.585	5.8	5.882	5.522
1022	11.15	8.38	41.73	34.94	23.14	4.114	2.849	5.026	5.425	4.14	4.03
1023	16.39	17.33	43	37.88	29.86	5.171	5.421	5.578	5.736	5.536	5.535
1024	17.14	19.72	47.58	38.85	32.95	5.135	5.18	5.581	5.683	5.441	5.482
1025	12.22	10.96	42.05	36.76	25.22	4.141	3.446	5.143	5.255	4.582	4.269
1026	16.83	15.19	43.58	36.6	28.51	4.913	4.696	5.657	5.495	5.291	5.184
1027	16.72	22.33	51.18	41.92	36.27	5.178	5.582	5.821	5.859	5.784	5.766
1028	15.15	16.97	46.11	38.92	30.74	4.994	4.614	5.627	5.709	5.149	5.186
1029	12.89	9.94	44.29	36.42	26.12	4.437	3.666	5.489	5.273	4.731	4.56
1030	17.99	22.45	52.08	42.39	37.45	5.909	5.985	6.069	6.186	5.783	6.185
1031	16.1	19.31	45.13	35.8	30.49	5.067	4.744	5.275	5.111	5.155	5.097
1032	14.65	17.88	44.77	37.17	29.6	5.172	4.896	5.379	5.69	5.038	5.243
1033	13.53	12.56	44.08	35.55	26.68	4.453	3.805	5.328	5.591	4.288	4.518
1034	9.09	5.49	39.27	28.12	18.07	3.177	2.281	4.864	4.586	4.176	3.432
1035	12.91	13.62	40.99	35.51	23.58	4.536	4.432	5.09	5.454	4.779	4.584
1036	12.48	9.64	40.54	36.44	24.02	4.314	3.529	5.23	5.618	5.144	4.585
1037	19.92	19.68	48.85	38.2	34.34	5.396	5.165	5.656	5.729	5.662	5.6
1038	18.56	20.5	52.23	40.47	36.42	5.113	5.171	6.143	6.143	5.709	5.711
1039	15.67	19.17	44.01	39.7	30.9	5.395	5.13	5.892	5.914	5.416	5.621
1040	13.02	16.48	46.04	37.96	29.46	4.563	4.621	5.662	5.445	4.886	4.991
1041	10.48	10.2	43.82	36.02	24.89	3.868	2.941	5.521	5.551	4.628	4.222
1042	14.71	17.37	45.21	38.9	30.53	4.993	4.588	5.226	5.651	5.046	5.045
1044	14.81	16.65	44.99	36.6	29.24	4.186	4.452	5.497	5.555	5.404	4.894
1045	15.33	16.18	47.07	36.37	29.95	4.838	4.871	5.815	5.657	5.371	5.278
1046	16.26	18.04	43.08	37.36	29.71	4.988	5.059	5.516	5.561	5.027	5.274
1047	16.52	18.78	48.08	38.67	32.87	5.771	5.651	6.234	6.166	5.985	6.145
1048	13.49	9.75	44.03	35.25	25.63	4.216	3.583	5.493	5.578	5.062	4.6
1049	16.51	19.18	44.44	36.93	30.35	4.948	5.106	5.683	5.785	5.478	5.404
1050	15.64	15.35	46.33	35.97	29.33	5.057	4.524	5.84	5.731	5.535	5.282
1051	9.59	7.78	39.74	31.8	20.67	3.63	2.943	4.658	4.902	4.083	3.734
1052	14.32	11.52	44.86	38.32	27.55	4.588	3.629	5.312	5.65	4.447	4.576
1053	16.76	16.47	45.34	37.8	30.28	4.766	4.509	5.274	5.309	4.829	4.837
1054	13.97	17.28	46.09	35.81	29.46	4.985	4.954	5.394	5.602	5.21	5.266
1055	15.94	16.37	48.72	40.22	32.64	4.812	4.556	5.485	5.925	5.489	5.237
1056	11.08	6.82	41.93	35.72	22.74	3.977	2.68	5.2	5.391	4.405	4.043
1057	10.46	8.96	40.73	35.54	22.67	3.674	2.879	4.754	5.104	3.984	3.739
1058	14.21	14.24	43.36	36.9	27.8	4.693	4.55	5.251	5.578	5.274	5.029
1059	17.27	23.58	50.25	40.73	35.58	5.667	5.888	6.147	6.219	6.063	6.144
1060	17.11	18.39	46.23	36.55	30.95	5.356	4.83	5.901	5.868	5.408	5.504
1061	15.53	16.61	45.47	37.32	29.95	4.772	4.873	5.466	5.617	5.626	5.275
1062	13.26	15.91	43.66	35.49	27.21	4.17	4.676	5.192	5.261	5.244	4.795
1063	10.8	7.45	43.26	38.05	24.39	4.195	2.966	5.422	5.491	4.993	4.346
1064	9.28	7.8	38.98	31.24	19.71	3.456	2.885	4.659	5.131	4.546	3.806
1065	14.54	14.64	42.31	37.28	27.3	4.455	4.435	5.218	5.547	4.761	4.788
1066	11.09	9.19	38.43	33.85	21.47	4.448	2.802	4.888	5.33	4.097	4.057
1067	16.03	19.4	47.05	39.27	32.04	5.072	5.589	5.56	5.726	5.533	5.538
1068	14.5	16.46	42.48	36.54	27.79	4.878	4.755	5.356	5.635	5.13	5.092
1069	14.71	15.22	46.81	38.3	30.01	4.526	4.636	5.349	5.66	5.548	5.055
1070	18.4	21.24	50.47	44.01	36.6	5.905	5.626	5.95	5.998	6.211	6.092
1071	19.21	21.42	47.69	41.24	35.11	5.219	5.036	5.622	5.837	5.164	5.38
1072	16.5	16.75	47.51	37.4	31.54	5.35	4.908	5.631	5.81	5.298	5.467
1073	11.18	8.44	39.41	31.29	21.63	3.991	3.218	5.059	5.275	4.666	4.253
1074	10.8	8.26	39.55	30.67	20.68	4.05	2.671	5.274	5.132	4.42	4.049
1075	15.05	15.8	46.12	39.12	30.94	4.553	4.394	5.598	5.92	5.113	5.063
1076	13.75	10.17	46.02	37	27.05	3.65	2.951	5.18	5.281	3.985	3.902
1077	14.28	14.88	42.14	42.47	28.8	4.491	4.457	5.294	5.779	4.774	4.84
1078	20.03	19.6	49.96	41.07	35.91	5.825	5.524	5.948	6.043	5.594	5.95
1079	17.11	21.65	46.34	40.67	33.6	5.13	5.293	5.529	5.85	5.17	5.455
1080	14.54	14.15	44.41	37.98	28.4	4.534	4.005	5.471	5.604	4.954	4.794
1081	16.88	17.49	46.75	38.42	31.46	5.063	4.614	5.846	5.938	5.411	5.323
1082	17.16	20.14	48.2	39.23	33.55	4.765	5.262	5.907	5.605	5.743	5.507
1083	18.97	21.15	51.39	44.96	37.84	5.305	5.23	5.902	6.251	5.591	5.742
1084	13.14	15.19	44.05	37.12	27.72	4.388	4.012	5.03	5.273	4.81	4.542
1085	11.55	9.4	45.08	37.77	25.87	3.966	2.918	5.076	5.698	4.627	4.166
1086	11.18	10.64	44.56	36.01	25.41	4.149	3.813	5.074	5.426	4.56	4.383
1087	19.37	25.22	49.84	42.08	37.57	5.809	6.077	5.744	6.161	5.637	6.057
1089	14.18	17.3	48.37	36.75	30.65	4.665	4.642	5.788	5.724	5.446	5.194
1090	16.17	19.53	46.58	38.13	31.62	5.426	5.212	5.885	5.655	5.486	5.602
1091	17.57	16.21	46.33	38.64	31.51	5.075	5.145	5.572	5.773	5.794	5.524
1092	15.29	16.33	47.4	39.91	31.46	4.661	4.808	5.498	5.702	5.444	5.203
1093	12.72	9.75	40.72	37.56	24.74	4.134	2.932	5.056	5.657	4.218	4.156
1094	16.47	19.28	45.5	37.2	31.32	5.357	5.587	5.887	5.709	5.814	5.778
1095	9.7	9.48	42.66	33.42	22.85	4.254	3.263	5.08	5.329	4.768	4.369
1096	15.7	12.11	45.96	39.21	29.25	4.819	3.609	5.554	5.682	4.848	4.785
1097	16.92	16.34	44.79	37.04	29.75	5.313	5.187	5.388	5.887	5.464	5.467
1098	13	12.68	42.36	33.72	25.1	4.032	4.015	5.516	5.462	5.375	4.709
1099	16.73	22.45	44.75	37.67	32.04	5.253	5.647	5.598	5.633	5.132	5.551
2001	15.57	15.83	43.71	37.83	29.64	5.196	5.013	5.347	5.681	5.271	5.558
2005	12.54	11.46	40.56	34.71	24.81	4.995	4	5.296	5.562	5.144	5.15
2006	15.77	16.34	47	37.87	32.11	5.436	5.367	5.711	5.989	5.271	5.913
2008	12.41	11.51	41.6	34.6	24.68	4.235	3.628	5.047	5.096	4.29	4.489
2009	14.28	15.47	44.46	36.53	28.86	4.907	4.499	5.306	5.509	5.087	5.215
2010	14.07	18.22	43.33	38.41	29.93	5.193	5.027	5.435	5.683	5.434	5.65
2100	19.34	19.77	42.86	38.5	32.26	6.073	5.287	5.499	6.033	4.769	5.851
2011	15.47	14.03	42.76	35.17	27.87	5.743	4.855	5.7	5.82	5.247	5.77
2013	19.01	19.21	46.26	39.06	33.63	5.593	5.327	5.644	5.626	5.281	5.786
2014	13.66	16.09	42.59	36.88	27.55	4.986	4.454	4.986	5.633	4.609	4.978
2015	14.55	11.76	42.1	36.54	27.21	5.539	4.273	5.601	5.5	5.356	5.474
2016	11.78	11.01	43.65	34.83	25.19	4.499	3.607	5.495	5.478	4.438	4.727
2017	15.2	17.79	42.04	36.87	29.45	5.827	4.771	5.242	5.813	4.876	5.615
2018	15.83	14.34	43.59	37.63	29.27	5.517	5.022	5.328	5.56	5.684	5.673
2019	16.44	16.94	43.56	39.65	30.9	5.32	4.918	5.322	5.702	5.167	5.501
2020	17.91	18.46	45.07	38.1	32.17	5.805	5.282	5.686	5.894	5.563	5.967
2022	13.77	12.83	39.87	36.48	25.86	4.691	3.896	5.087	5.283	5.009	4.92
2023	18.15	17.13	43.14	38.47	31.38	6.03	5.262	5.656	5.843	5.697	6.066
2024	16.94	16.98	43.62	37.19	30.37	5.574	5.382	5.559	5.531	5.335	5.813
2025	17.25	17.28	50.03	42.31	35.31	5.528	4.396	5.715	5.993	5.408	5.626
2026	16.6	16.87	43.55	34.15	29.35	5.318	5.238	5.372	5.367	5.706	5.684
2027	16.74	15.4	41.41	36.06	28.48	5.615	4.736	5.309	5.876	4.908	5.587
2028	14.77	16.89	46.21	39.66	31.74	5.199	4.892	5.333	5.486	5.379	5.481
2029	14.06	17.46	46.8	36.56	30.39	5.135	4.752	5.728	5.86	5.526	5.627
2030	14.99	20.05	47.54	37.54	33.27	5.304	5.287	5.735	5.776	5.921	6.017
2031	19.23	19.42	50.12	41.66	36.5	6.301	5.258	5.81	6.08	5.637	6.174
2032	16.52	19.95	46.14	41.03	33.72	5.252	5.206	5.683	5.971	5.565	5.787
2033	12.96	14.7	44.66	35.42	28.08	4.573	4.511	5.67	5.617	4.933	5.218
2034	15.24	15.16	44.42	34.63	28.72	5.593	5.412	5.47	5.838	5.583	5.898
2036	14.85	13.83	44.5	36.05	28.76	5.044	4.353	5.469	5.514	5.258	5.308
2037	16.11	16.14	47.34	39.67	32.48	5.28	5.096	5.808	5.765	5.591	5.791
2038	14.93	13.33	45.21	35.75	28.67	5.154	4.429	5.58	5.534	5.608	5.449
2039	17.12	18.17	47.36	38.43	33.07	5.881	5.228	5.616	5.788	5.022	5.821
2040	13.15	13.83	46.31	34.1	28.3	4.867	4.602	5.278	5.076	4.964	5.181
2041	13.97	15.92	46.15	36.45	29.64	5.186	4.763	5.705	5.743	5.821	5.702
2042	17.08	20.12	45.43	39.3	33.3	5.471	5.228	5.441	5.699	5.532	5.795
2043	14.2	15.45	46.49	38.9	31.08	5.513	4.456	5.449	6.031	5.495	5.649
2045	15.5	14.84	44.62	37.06	29.69	5.135	4.636	5.277	5.603	4.842	5.297
2046	14.34	15.68	44.29	38.33	29.69	5.216	4.585	5.586	5.83	5.21	5.503
2047	18.85	17.44	50.76	37.19	34.58	5.609	5.115	6.016	5.927	5.595	5.919
2048	14.5	13.89	44.52	37.05	28.81	5.142	4.688	5.555	5.904	5.367	5.576
2049	10.37	9	42.02	32.08	22.98	4.199	2.75	5.172	5.19	4.485	4.297
2050	18.1	20.94	47.36	40.52	34.61	5.798	5.452	5.549	5.46	5.45	5.889
2051	13.07	15.65	42.11	34.66	26.93	5.468	4.503	5.521	5.596	5.343	5.525
2052	14.99	15.93	45.07	38.56	30.58	4.921	4.463	5.682	5.715	5.225	5.361
2053	17.32	17.92	50.41	40.08	34.64	5.719	4.65	5.816	6.025	5.799	5.851
2055	16.72	16.63	42.28	39.07	30.34	5.674	5.062	5.199	5.656	5.189	5.657
2056	16.42	16.29	47.63	39.48	32.65	5.337	5.122	5.785	5.799	5.284	5.716
2057	14.05	14.73	43.08	33.99	27.36	4.609	4.495	5.032	5.119	5.425	5.083
2058	14.45	14.31	45.65	37.43	29.53	5.219	4.337	5.494	5.76	5.049	5.391
2059	18.25	20.7	48.81	37.78	34.27	5.978	6.066	5.805	5.633	6.226	6.357
2060	16.99	17.89	49.71	39.98	34.43	5.659	5.214	5.648	6.132	5.45	5.92
2061	14.76	16.36	47.53	42.43	32.43	5.534	4.759	6.079	6.039	5.621	5.855
2062	13.56	14.13	42.6	35.96	27.29	5.197	4.794	5.295	5.421	5.127	5.375
2063	13.43	13.63	43.37	35.49	27.33	5.048	4.477	5.381	5.664	5.281	5.334
2065	13.59	14.77	42	34.94	27.06	4.89	4.454	5.443	5.249	5.333	5.285
2066	18.48	21.26	47.3	40.42	34.93	5.775	5.414	5.503	5.862	5.579	5.974
2068	14.42	16.27	40.6	35.3	27.38	5.573	5.354	5.143	5.59	5.117	5.673
2069	14.91	15.36	44.74	38.89	30.17	5.11	4.702	5.183	5.708	4.903	5.222
2070	18.93	21.15	52.29	43.43	38.28	6.395	6.359	6.079	6.635	5.91	6.765
2071	11.83	12.05	39.83	32.58	23.97	4.414	3.95	5.091	5.41	4.961	4.829
2072	16.73	16.08	44.17	37.4	30.44	5.652	5.521	5.674	5.996	6.101	6.217
2073	13.35	12.87	40.03	32.31	24.55	4.785	4.191	5.261	5.476	5.242	5.103
2074	10.89	10.02	38.66	30.77	21.66	4.275	3.887	5.087	5.151	4.558	4.682
2075	18.37	19.19	48.62	42.96	35.52	5.93	5.154	5.98	6.121	5.922	6.174
2076	14.69	13.97	43.64	35.65	27.45	4.496	4.225	5.264	5.371	5.267	4.996
2077	16.18	15.62	46.56	39.78	32.01	6.128	5.212	5.78	5.869	5.898	6.138
2078	16.65	17.21	44.65	36.47	30.69	5.903	5.33	5.922	5.61	5.683	6.149
2079	15.91	16.45	43.84	36.68	29.56	5.815	5.281	5.764	6.022	5.705	6.035
2080	16.62	19.32	48.81	39.77	34.27	6.167	5.909	5.87	6.028	6.169	6.432
2081	18.74	18.7	47.61	40.77	34.75	6.09	5.311	5.574	5.953	5.842	6.107
2082	17.49	18.59	44.3	36.81	31.3	5.777	5.352	5.755	5.653	5.334	5.92
2083	17.57	17.23	49.56	37.99	33.43	5.734	5.135	6.03	5.658	5.617	5.928
2085	17.88	18.28	47.28	35.95	32.05	5.893	5.064	5.711	5.775	5.437	5.859
2086	18.84	17.68	43.56	37.71	31.52	5.682	5.158	5.224	5.618	5.656	5.792
2087	14.86	14.95	47.97	37.1	30.91	5.058	4.674	6.197	5.765	5.778	5.717
2088	16.14	16.62	44.78	39.77	31.52	5.368	4.917	5.359	5.499	4.754	5.422
2089	14.4	16.19	44.99	35.92	29.12	5.427	5.267	5.774	5.532	5.633	5.856
2090	15.4	15.42	44.38	35.91	29.23	5.251	4.885	5.471	5.684	5.079	5.548
2091	12.39	13.1	42.8	36.88	27.25	5.027	3.812	5.009	5.542	4.508	4.878
2092	15.43	19.55	50.14	38.79	34.01	6.148	5.389	5.91	6.066	5.665	6.196
2093	17.89	22.69	50.41	40.59	36.69	6.327	5.765	5.759	6.234	5.975	6.426
2095	17.42	23.29	49.8	38.98	35.98	5.872	5.991	6.315	5.956	5.83	6.395
2097	16.53	15.13	43.17	37.83	29.77	5.702	5.27	5.387	5.759	5.037	5.759
2098	18.03	15.16	45.03	37.86	31.25	5.246	4.623	5.677	5.852	5.53	5.614
2099	19.65	19.38	45.49	40.19	34.2	5.489	5.088	5.737	5.891	5.629	5.878
3001	14.68	17.19	45.65	38.4	30.64	5.459	5.143	5.523	5.867	5.033	5.643
3002	18.73	23.64	46.97	39.23	35.06	5.927	6.223	5.694	5.763	5.774	6.253
3003	18.79	15.63	43.44	39.7	31.34	5.205	5.374	5.277	5.813	4.941	5.552
3004	16.88	20.79	48.56	39.28	34.08	5.703	5.426	6.057	5.779	5.933	6.083
3005	16.18	16.81	40.58	36.25	28.34	5.581	5.658	5.569	5.663	5.374	5.854
3006	14.13	16.4	44.53	35.01	28.57	4.986	4.831	5.614	5.67	5.453	5.465
3007	17.38	24.73	49.61	43.25	37.6	5.794	5.843	5.67	6.116	5.55	6.098
3008	9.19	5.23	40.47	34.98	21.41	3.698	2.568	4.703	5.082	3.977	3.85
3009	14.59	16.61	45.15	36.35	29.58	5.313	5.224	5.262	5.595	5.196	5.546
3010	16.7	22.93	44.34	36.85	32.08	5.585	5.871	5.412	5.798	5.581	5.961
3100	13.17	15.87	46.6	37.7	30.09	4.872	4.694	5.733	5.574	5.386	5.407
3011	12.92	12.4	42.38	33.51	23.43	4.612	4.48	5.376	5.371	4.501	4.855
3012	13.74	16.95	43.68	38.99	29.71	4.884	4.477	5.095	5.567	4.82	5.074
3013	12.03	14.09	42.2	33.98	25.82	4.426	4.5	4.97	5.365	4.817	4.868
3014	15.87	20.3	43.84	37.35	30.87	5.482	5.543	5.459	5.606	5.271	5.715
3015	16.66	19.22	45.19	41.14	32.91	5.768	5.542	5.849	5.874	5.308	5.965
3016	17.74	21.19	48.38	40.41	34.92	5.707	5.531	5.75	5.817	5.293	5.923
3017	15.18	18.14	44.9	37.35	30.47	5.122	5.393	5.502	5.635	5.371	5.608
3018	16.98	15.95	43.79	35.99	29.6	5.179	5.15	5.304	5.642	5.383	5.544
3019	16.33	18.3	42.46	38.22	30.28	5.335	5.383	5.433	5.827	5.376	5.708
3020	15.85	18.5	43.93	40.07	31.39	5.418	5.288	5.199	5.831	4.954	5.579
3021	13.89	15.04	42.67	35.72	27.55	5.102	4.726	5.21	5.544	5.011	5.265
3022	13.39	13.75	48.28	38.27	30.16	5.015	4.803	5.88	5.704	5.412	5.534
3023	14.77	15.9	45.22	36.9	29.59	4.683	4.705	5.623	5.327	5.168	5.227
3024	17.2	18.45	49.2	38.74	34.35	5.032	5.179	5.895	5.475	5.344	5.601
3025	17.92	19.65	45.38	39.17	32.76	5.434	5.653	5.665	5.974	5.12	5.826
3026	18.78	20.34	48.51	37.6	34.1	4.983	5.136	5.44	5.602	5.376	5.513
3027	17.37	21.19	47.45	36.43	33.07	5.612	5.877	5.763	5.743	5.777	6.069
3028	13.5	16.9	44.25	37.51	29.27	5.382	5.183	5.508	5.824	5.335	5.661
3029	18.11	19.57	45.75	39.42	33.11	5.264	5.09	5.655	5.583	5.394	5.643
3030	18.35	20.68	43.3	36.73	31.72	5.775	5.966	5.539	5.591	5.234	5.948
3031	16.46	20.26	42.51	37.83	30.82	5.674	5.448	5.599	5.911	5.317	5.904
3032	13.22	11.53	41.22	36.97	25.9	4.859	4.456	5.186	5.533	4.748	5.077
3033	14.66	14.48	49.65	39.42	31.83	5.005	4.76	5.657	5.58	5.442	5.448
3034	15.16	15.34	46.89	39.32	31.1	5.169	4.936	5.583	5.884	5.451	5.595
3035	15.56	19.16	42.76	36.86	29.89	5.569	5.525	5.341	5.806	5.05	5.729
3036	17.24	16.37	44.81	40.2	31.62	5.065	4.91	5.604	5.574	5.417	5.516
3037	15.48	17.42	43.18	36.79	29.47	5.188	5.052	5.222	5.494	5.073	5.414
3038	14.09	18.05	44.08	35.12	28.74	5.237	5.125	5.37	5.463	5.24	5.512
3039	17.02	25.57	47.94	38.39	35.23	5.62	6.013	5.931	5.743	5.995	6.21
3040	21.08	21.06	47.13	39.46	35.42	5.187	5.48	5.506	5.664	5.37	5.668
3041	16.07	17.73	45.47	37.02	30.78	5.253	5.228	5.492	5.758	5.283	5.634
3042	15.09	15.17	48.34	38.3	31.13	4.459	4.418	5.307	5.34	5.231	5.034
3043	17.15	20.18	45	36.98	32.13	5.83	5.265	5.695	5.889	5.546	5.974
3044	14.42	17.91	42.13	35.09	27.99	5.193	5.356	5.064	5.519	4.728	5.385
3045	13.98	13.34	38.89	31.14	24.15	4.562	4.487	4.782	5.299	4.505	4.817
3046	14.71	16.6	41.44	35.12	27.5	4.637	4.617	5.23	5.403	5.409	5.169
3047	13.73	15.24	43.15	39.46	28.97	5.326	5.052	5.223	5.754	5.555	5.598
3048	14.95	15.89	45.84	38.06	30.39	5.034	4.744	5.293	5.827	5.354	5.397
3049	14.94	16.82	47.21	39.63	31.56	4.867	4.813	5.533	5.579	5.137	5.347
3050	16.57	18.01	44.62	38.83	31.38	5.782	5.425	5.531	5.912	5.55	5.945
3051	15.79	15.72	47.45	41.29	32.49	5.303	4.859	6.048	5.922	5.539	5.726
3052	16.83	19.12	47.25	39.1	33.22	5.192	5.101	5.48	5.698	5.12	5.523
3053	13.19	13.44	44.51	33.81	26.79	4.668	4.697	5.471	5.619	5.466	5.307
3054	13.83	13.84	43.56	37.55	28.26	4.645	4.76	5.322	5.625	5.421	5.281
3055	16.16	17.01	43.86	37.78	30.42	5.375	5.328	5.564	5.638	5.118	5.652
3056	12.15	10.97	45.59	36.48	27.02	4.475	3.931	5.521	5.745	5.077	4.974
3057	15.18	13.99	46.31	38.51	30.04	4.968	4.555	5.463	5.445	5.007	5.23
3058	12.55	17.02	46.02	37.25	29.32	4.323	4.531	5.365	5.526	5.631	5.113
3059	12.24	11.23	42.7	33.92	24.6	4.351	3.6	5.448	5.44	4.79	4.691
3060	14.93	17.41	44.21	41.69	31.6	4.92	4.969	5.237	5.393	4.883	5.261
3061	14.01	13.19	46.06	37.51	29.05	4.801	4.889	5.513	5.704	5.506	5.468
3062	14.06	18.56	45.77	39.68	31.25	5.244	5.186	5.624	5.867	5.564	5.728
3063	15.77	17.68	42.93	37.63	29.8	5.472	5.41	5.454	5.825	5.538	5.823
3064	17.21	19.71	43.38	39.48	31.79	5.318	5.484	5.636	5.84	5.481	5.832
3065	16.57	18.51	42.92	40.57	31.69	5.309	5.309	5.356	5.685	5.242	5.631
3066	15.77	15.94	44.97	37.96	30.44	5.183	5.251	5.419	5.434	5.16	5.503
3067	16.43	17.46	42.76	35.77	29.55	4.929	5.185	5.279	5.303	5.375	5.429
3068	15.59	18.85	46.41	38.04	31.84	5.192	4.832	5.594	5.924	5.273	5.557
3069	18.8	20.98	49.42	39.66	35.43	5.837	5.7	5.838	5.926	6.007	6.191
3070	14.98	13.96	42.45	37.47	28	4.999	5.058	5.197	5.687	4.533	5.237
3071	13.62	14.88	43.76	37.53	28.49	4.687	4.455	4.839	5.437	4.992	4.993
3072	14.42	12.9	41.33	35.97	26.42	4.72	4.887	5.018	5.409	4.684	5.08
3073	15.79	17.85	48.17	43.03	34.12	5.106	4.928	5.856	5.98	5.212	5.589
3074	14.71	14.52	43.33	36.46	28.19	5.42	5.353	5.458	5.713	4.939	5.611
3075	14.33	16.32	40.67	34.29	26.87	5.157	5.262	5.14	5.329	4.612	5.338
3076	16.07	14.25	48.44	40.3	31.95	5.452	5.275	5.554	5.611	5.391	5.686
3077	16.36	20.02	47.53	40.64	34.66	5.421	4.909	5.726	6.017	5.248	5.725
3078	14.58	14.51	45.7	37.47	29.38	4.911	4.777	5.479	5.589	5.353	5.348
3079	16.54	18.47	46.38	39.43	32.66	5.542	5.294	5.769	5.59	5.841	5.896
3080	19.06	22.37	44.2	42.77	34.63	5.935	6.113	5.566	6.098	5.526	6.179
3082	16.76	17.39	47.27	40.9	33.13	5.453	4.939	5.606	5.858	5.53	5.691
3083	12.66	11.4	39.93	32.95	23.83	4.356	4.302	4.918	5.375	4.918	4.834
3084	14.27	18.36	44.71	36.16	29.48	5.132	5.135	5.419	5.572	5.155	5.476
3085	13.96	15.25	44.75	40.54	29.89	4.993	4.614	5.268	5.919	5.136	5.305
3087	14.03	15.37	39.37	35.55	26.33	4.931	5.09	5.139	5.771	4.849	5.344
3088	17.85	18.9	45.54	37.55	31.94	5.523	5.42	5.472	5.77	5.603	5.803
3089	15.78	15.21	45.12	37.4	29.97	5.161	4.796	5.106	5.646	4.849	5.283
3090	15.05	14.94	42.39	36.9	28.39	5.188	5.03	5.469	5.857	5.216	5.559
3091	13.68	16.73	42.55	34.62	27.39	5.25	5.024	5.416	5.744	5.419	5.587
3092	15.89	19.68	47.59	37.29	32.66	5.487	5.296	5.45	5.409	4.993	5.605
3093	14.38	13.07	43.93	35.35	27.57	4.549	4.431	5.397	5.385	5.021	5.032
3094	18.42	20.76	47.73	38.67	34.27	5.888	5.562	5.748	5.803	5.759	6.061
3095	14.68	15.58	44.29	38.8	30	4.994	4.985	5.157	5.754	5.244	5.402
3096	14.54	16.29	45.61	37.41	29.92	5.678	5.711	5.527	5.979	6.145	6.126
3097	14.75	20.2	44.99	38.03	31.45	5.652	5.24	5.578	5.871	5.97	5.956
3098	14.85	18.54	43.81	34.39	28.77	5.287	5.41	5.376	5.394	5.308	5.612
3099	12.9	14.48	46.39	36.01	28.67	5.127	5.004	5.858	5.703	5.723	5.681
4001	14.12	15.72	45.31	36.95	29	5.099	4.665	5.55	5.494	5.919	5.48
4002	11.79	9.91	41.07	34.57	23.42	3.995	2.823	5.138	5.441	4.628	4.26
4003	15.38	15.46	39.57	36.21	26.65	5.034	4.55	5.436	5.599	4.623	5.148
4004	15.96	15.65	48.52	39.32	31.63	5.383	4.765	5.953	6.119	5.998	5.789
4005	15.62	14.46	41.18	34.41	26.5	4.52	4.305	5.121	5.035	5.094	4.87
4006	12.82	13.03	42.79	39.52	27.36	4.72	4.188	5.46	6.013	5.345	5.192
4007	15.06	13.73	45.11	40.87	29.71	5.035	4.39	5.643	5.776	5.022	5.256
4008	12.99	15.17	45.1	37.13	28.56	4.759	4.527	5.643	5.719	5.434	5.304
4009	14.81	13.02	44.65	42.58	30.19	4.515	3.947	5.57	6.179	5.215	5.074
4010	12.82	13.09	44.82	35.53	26.72	5.021	4.438	5.696	5.851	5.406	5.355
4100	13.56	13.61	46.16	35.87	28.16	4.517	4.001	5.2	5.389	5.168	4.889
4011	14.37	16	45.63	39.68	30.02	5.036	4.491	5.511	5.796	5.751	5.397
4012	14.6	15.37	49.03	39.04	31.37	5.091	4.455	5.593	5.82	5.268	5.39
4013	14.72	14.72	45.53	38.81	29.57	4.809	4.321	5.849	5.776	5.785	5.376
4014	14.59	13.22	41.99	34.58	26.2	4.975	4.343	5.427	5.335	4.919	5.107
4015	15.13	16.73	46.1	40.33	30.81	5.442	4.411	5.653	6.286	5.257	5.508
4016	15.31	16.96	49.3	40.89	32.9	5.135	4.695	5.767	5.712	5.526	5.504
4017	15.05	17.05	46.34	41.18	31.19	5.03	4.361	5.731	6.013	5.522	5.419
4018	14.22	12.35	43.54	36.69	26.98	4.538	3.903	5.312	5.657	4.922	4.861
4019	13.14	14.21	44.19	36.98	27.59	4.449	4.559	5.577	5.581	5.437	5.171
4020	15.58	19.17	43.79	42.41	31.65	5.592	5.043	5.651	6.3	5.069	5.716
4022	15.6	19.41	47.37	37.84	31.9	5.26	5.204	5.614	5.699	5.766	5.736
4023	14.17	15.22	46.1	34.9	28.33	4.687	4.369	5.523	5.643	5.332	5.169
4024	11.34	12.03	44.19	35.16	25.67	3.604	3.23	5.105	5.468	4.915	4.354
4025	16.52	17.54	48.96	42.77	33.84	5.504	5.069	6.048	6.011	6.344	5.995
4026	13.3	12.2	46.47	39.72	28.73	4.097	3.834	5.535	5.565	5.486	4.859
4027	15.19	18.16	48.06	39.7	32.25	5.122	5.397	5.997	6.232	5.99	5.93
4028	12.94	14	41.96	37.24	26.61	4.765	3.754	5.267	5.933	5.117	4.994
4029	14.13	15.15	46.13	36.08	28.71	4.781	4.075	5.358	5.79	5.178	5.103
4030	14.34	16.4	45.06	35.05	28.6	5.105	4.341	5.616	5.44	5.774	5.399
4031	15.56	18.66	51.23	44.37	35.3	5.032	4.609	5.852	5.874	5.692	5.525
4032	13.24	9.82	41.76	33.83	24.06	4.393	3.859	5.063	5.351	5.297	4.791
4033	14.14	14.05	43.55	38.14	27.81	4.565	4.288	5.667	5.745	5.524	5.195
4035	15.73	14.5	47.54	41.92	31.64	5.104	4.453	5.99	6.533	5.661	5.607
4036	14.97	14.7	49.04	40.38	31.62	4.951	4.108	5.647	5.882	5.644	5.307
4037	12.18	8.64	42.69	33.29	23.64	4.398	3.2	4.908	5.689	4.766	4.53
4038	14.19	17.61	44.85	37.17	29.63	4.777	4.548	5.874	5.884	5.559	5.429
4040	13.13	11.67	41.28	34.8	24.76	4.43	3.82	5.334	5.801	5.139	4.881
4041	12.74	10.58	45.36	33.37	25.91	4.192	3.679	5.416	5.611	5.175	4.79
4043	13.14	9.67	39.23	34.94	23.6	4.425	3.842	5.488	5.527	4.198	4.667
4044	16.61	19.44	46.63	39.83	32.58	5.636	4.795	5.445	6.008	5.637	5.7
4045	12.82	11.59	40.99	31.93	23.58	4.717	3.809	5.362	5.597	4.888	4.865
4046	16.37	17.04	43.65	39.53	30.38	4.95	4.658	5.035	5.615	5.423	5.277
4047	14.75	14.22	43.03	39.14	28.54	4.716	4.272	5.467	5.827	4.819	5.093
4048	10.53	13.31	40.9	29.59	22.48	3.959	3.239	5.039	5.224	4.833	4.396
4050	14.13	17.33	42.74	37.18	27.72	4.909	4.809	5.508	5.599	5.249	5.35
4051	13.6	12.6	43.44	37.82	27.23	4.195	3.597	5.461	5.406	4.932	4.693
4052	15.88	18.45	43.24	42.18	31.18	5.418	4.991	6.087	6.072	6.013	5.913
4053	14.61	16.07	42.2	34.34	25.71	5.008	4.554	5.244	5.593	5.701	5.289
4055	11.89	6.46	39.82	31.16	20.94	3.664	2.788	4.94	5.311	4.489	4.01
4056	14.43	14.03	46.8	41.34	30.48	4.875	4.107	5.464	5.98	5.368	5.211
4057	14.27	9.58	42.3	37.13	26.01	4.355	3.831	5.572	5.706	4.907	4.837
4058	15	14.74	45.43	37.02	29.22	4.757	4.068	5.107	5.56	5.082	4.948
4059	13.48	14.69	48.87	40.07	30.97	4.235	3.653	5.568	5.575	5.04	4.757
4060	15.56	15.66	44.16	37.76	28.97	4.883	4.205	5.459	5.837	5.181	5.137
4061	12.01	10.84	42.97	34.43	24.67	4.277	3.387	5.013	5.532	4.789	4.522
4062	15.87	15.88	43	36.68	28.38	5.311	4.986	5.371	5.503	5.287	5.46
4063	15.88	20.19	48.1	41.41	33.38	5.381	4.81	5.645	5.776	5.406	5.571
4064	13.01	16	42.65	39.14	28.29	4.643	4.381	5.44	5.743	5.023	5.14
4065	16.14	15.79	47.39	38.76	31.71	5.197	4.934	5.707	5.693	5.976	5.705
4066	13.24	14.02	47.48	36.6	29	5.064	4.6	5.744	6.226	5.867	5.635
4067	11.58	11.63	41.17	29.86	22.37	3.679	3.681	4.867	5.057	4.101	4.151
4068	18.31	21.83	47.73	43.78	35.66	6.089	5.466	5.637	6.318	5.972	6.195
4069	13.94	14.52	44.2	37.08	28.26	4.615	4.159	5.294	5.534	5.187	4.982
4070	16.43	16.1	46.89	42.01	32.33	5.371	4.692	5.736	5.972	5.538	5.616
4071	16.01	20.39	47.21	36.77	32	5.242	5.041	5.726	5.834	5.892	5.731
4072	15.52	21.87	50.88	42.07	35.54	5.624	5.559	5.989	5.684	5.768	6.02
4073	15.15	14.21	44.38	34.15	27.16	4.794	4.876	5.717	5.54	5.327	5.381
4075	12.89	13.55	46.39	36.5	28.11	4.836	4.248	5.765	5.647	5.487	5.263
4076	12.36	8.1	42.39	33.73	23.61	3.872	3.182	5.128	5.338	4.401	4.246
4077	14.4	13.86	48.57	37.87	30.05	4.816	4.352	6.056	5.926	6.04	5.512
4079	17.62	16.31	49.65	40.36	33.37	5.048	4.883	5.644	5.694	4.874	5.323
4081	14.1	14.27	45.89	35.24	28.09	4.945	4.733	5.838	5.688	5.354	5.422
4084	12.31	13.57	41.55	33.07	24.6	4.572	3.841	5.225	5.268	4.997	4.786
4085	15.05	15.84	48.51	34.9	30.01	5.249	4.714	6.042	5.943	5.708	5.7
4086	15.97	14.74	53.05	40.75	34.01	5.278	4.376	5.975	6.183	5.674	5.643
4087	13.88	13.63	48.98	37.9	30.14	4.433	3.886	5.579	5.686	5.262	4.971
4088	14.62	14.25	42.46	33.71	26.37	4.5	3.889	5.297	5.231	4.59	4.743
4089	16.29	17.19	47.32	37.66	31.33	4.997	3.927	5.471	5.546	4.666	5.005
4090	12.47	10.06	41.43	34.34	23.79	4.057	3.235	5.344	5.477	4.781	4.456
4091	14.76	20.36	42.26	37.38	29.49	5.137	5.088	5.733	5.664	5.396	5.575
4092	13.91	15.04	45.5	41.22	30.08	5.007	4.431	5.642	5.849	5.417	5.39
4093	15.81	16.18	49.02	38.38	31.75	5.387	4.645	5.881	5.807	5.514	5.593
4094	12.93	14.79	41.4	34.89	25.74	4.201	3.678	5.079	5.105	4.832	4.54
4095	12.67	10.1	41.89	33.28	23.84	4.465	3.744	5.602	5.538	4.932	4.827
4096	13.76	12	42.33	38.05	26.69	4.525	4.059	5.358	5.701	5.023	4.923
4097	12.56	9.24	46.93	37.6	27.07	3.856	3.135	5.666	5.622	5.45	4.609
4098	12.84	12.4	44.11	36.68	26.82	4.123	3.689	5.385	5.345	5.223	4.714
4099	14.11	14.25	46.46	37.56	28.99	4.924	3.869	5.701	5.533	5.276	5.113
5001	13.03	14.17	46.21	42.8	29.08	4.544	4.15	5.807	5.965	5.27	4.94
5002	15.79	15.39	47.22	40.54	30.13	5.212	4.069	5.739	5.873	5.449	5.141
5003	13.07	17.91	47.45	38.92	29.49	4.77	4.421	5.594	5.654	5.657	5.131
5004	15.34	15.38	48.44	38.36	29.79	5.403	4.321	6.319	5.922	5.719	5.451
5005	15.27	15.73	45.1	39.11	28.87	4.632	3.698	5.142	5.696	5.036	4.626
5006	16.06	18.3	49.55	42.07	33.02	5.193	4.669	5.996	6.208	5.651	5.538
5007	12.92	15.86	46.67	36.39	27.85	4.979	4.049	6.104	6.073	5.725	5.275
5009	10.44	4.69	36.98	29.87	15.94	3.308	2.214	4.892	5.157	4.212	3.49
5010	11.28	8.76	42.41	35.29	22.72	3.749	2.82	5.567	5.52	4.593	4.126
5100	12.65	11.87	40.27	33.95	22.9	4.022	3.349	5.008	5.434	4.77	4.248
5011	14.04	13.55	48.55	37.57	29.29	4.911	4.047	6.135	5.947	5.465	5.254
5015	15.96	21.97	54.01	42.17	35.65	5.689	4.552	5.813	6.246	5.355	5.5
5016	14.36	12.66	39.22	35.11	23.98	4.287	3.712	5.206	5.605	4.826	4.528
5017	11.01	7.08	45.08	34.26	22.54	3.813	2.213	5.198	5.369	4.302	3.727
5018	16.19	20.42	43.9	40.98	31.01	5.014	4.521	5.024	5.587	5.11	4.989
5019	12.94	14.07	46.47	37.04	27.13	4.384	3.675	5.784	5.433	5.043	4.633
5020	11.92	6.21	38.81	32.91	19.9	3.576	2.562	5.157	5.177	4.519	3.804
5021	9.54	3.43	35.52	28.88	15.43	2.337	1.647	4.071	4.894	3.429	2.631
5022	15.57	13.93	43.26	36.65	26.63	4.848	3.974	5.317	5.571	5.197	4.789
5023	17.19	15.99	48.39	41.87	33.84	5.03	4.532	6.036	5.903	5.298	5.345
5024	16.33	15.42	45.1	40	30.45	5.186	4.545	5.619	5.857	5.935	5.491
5025	14.65	16.09	45.42	39.21	28.76	4.765	3.784	5.735	5.729	5.594	4.966
5026	12.79	8.74	44.31	38.78	25.25	4.319	2.973	5.489	5.601	4.827	4.315
5027	9.89	4.91	32.58	32.05	15.76	3.136	2.034	4.066	4.724	3.306	2.953
5028	10.78	5.09	34.96	30.22	16.43	2.795	1.997	4.333	4.606	3.374	2.867
5029	14.16	14.84	48.09	38.82	29.19	4.519	4.041	5.717	5.883	5.642	4.951
5030	13.23	12.56	45.71	36.6	26.12	4.333	3.783	5.535	5.336	4.718	4.475
5031	12.42	7.17	41.03	34.29	21.77	3.627	3.117	5.582	5.178	5.019	4.14
5032	14.41	15.67	45.18	37.2	27.53	4.513	4.036	5.653	5.973	5.054	4.839
5033	15	17	50.2	40.36	31.51	4.912	4.13	5.902	6.018	5.285	5.105
5034	14.01	15	48.09	37.96	29.07	4.783	4.14	5.89	5.865	5.578	5.129
5036	12.4	6.45	39.23	34.66	20.74	3.813	2.447	5.265	5.265	4.365	3.82
5037	13.89	13.03	44.7	38.22	27.01	4.762	3.298	5.358	5.772	4.732	4.567
5038	17.89	18.12	44.11	37.08	29.34	5.04	4.765	5.911	5.504	5.524	5.278
5039	13.1	12.35	47.43	37.68	27.97	4.114	3.436	5.775	5.714	5.162	4.603
5040	17.37	15.96	45.91	40.81	30.89	5.202	4.721	5.859	5.596	5.735	5.372
5041	11.89	10.59	39.79	32.08	21.34	3.764	3.016	4.7	4.785	4.273	3.795
5042	12.13	6.38	44.69	37.7	24.1	3.607	2.622	5.177	5.399	4.557	3.86
5043	10.1	6.33	36.25	30.09	16.93	2.954	2.037	4.244	4.548	3.518	2.956
5044	15	15.3	46.22	40.18	29.28	4.83	4.156	5.655	6.033	5.476	5.066
5045	16.74	19.65	49.51	37.45	31.82	5.234	4.517	5.96	6.1	5.671	5.412
5046	14.3	12.9	46.03	35.84	26.79	4.141	3.442	5.342	5.467	4.665	4.297
5047	16.48	15.44	44.53	40.08	29.37	5.124	4.251	5.519	5.907	5.624	5.2
5048	13.73	13.59	46.36	36.29	27.13	4.612	3.706	5.38	5.454	5.261	4.698
5050	14.28	13.03	44.54	36.64	26.53	4.542	3.661	5.534	5.662	5.004	4.64
5053	13.71	12.19	46.47	35.14	26.58	4.063	3.687	5.928	5.584	5.74	4.809
5054	13.63	14.93	48.96	38.34	29.53	4.668	3.417	5.803	5.687	5.455	4.811
5055	13.09	9.64	45.57	32.5	24.09	4.205	3.04	5.339	5.581	5.357	4.404
5056	12.71	9.21	44.8	37.64	25.18	3.613	2.796	4.968	5.368	4.621	3.847
5057	13.86	13.51	43.37	35.87	25.51	4.384	3.376	5.257	5.423	4.96	4.331
5058	13.5	11.75	45.8	39.33	27.26	4.101	3.13	5.232	5.674	4.985	4.31
5059	13.92	12.38	44.81	38.65	27.35	4.202	3.171	5.366	5.671	5.091	4.419
5060	13.29	15.38	49.39	40.56	30.26	4.494	3.977	5.839	6.033	5.709	5.022
5061	14.25	13	46.06	35.03	26.52	4.169	3.427	5.218	5.528	5.403	4.517
5064	11.51	9.58	39.01	33.7	20.32	3.847	3.028	4.792	5.256	4.546	3.876
5065	17.25	18.16	46.49	38.27	30.49	5.105	4.526	5.819	5.794	5.841	5.336
5066	18.95	23.85	49.92	44.28	36.32	6.137	5.25	5.597	6.376	5.72	5.858
5067	13.14	14.69	41.48	32.23	23.67	4.219	3.866	5.016	5.403	4.897	4.489
5069	12.06	10.38	43.77	34.02	22.45	3.213	3.11	5.03	5.311	4.561	3.678
5070	14.12	12.67	44.75	40.57	27.68	4.548	3.821	5.597	5.923	4.742	4.681
5071	13.41	15.16	51.21	38.96	30.45	4.352	4.209	6.366	6.111	5.673	5.143
5073	18.33	20.04	54.36	40.99	35.81	5.508	4.545	5.984	6.252	5.553	5.48
5074	14.84	13.72	46.6	37.56	28.09	4.349	4.05	5.669	5.584	5.206	4.806
5075	12.79	13.55	42.99	34.07	24.7	4.122	3.604	5.385	5.432	5.199	4.522
5076	12.56	8.8	40.71	35.9	22.7	4.114	3.005	5.293	5.482	4.635	4.214
5077	13.48	14.35	45.59	41.37	28.63	4.699	3.949	5.657	5.936	5.285	4.909
5078	19.32	21.69	51.2	40.88	35.51	6.083	5.409	5.871	6.203	6.109	6.036
5079	11.56	7.26	42.78	34.69	22.34	3.768	2.215	5.225	5.41	4.47	3.799
5080	16.49	19.41	48.55	37.83	31.54	5.109	4.943	6.061	5.796	5.677	5.48
5081	15.33	17.56	48.63	36.8	30.01	4.877	4.35	5.587	5.751	5.237	5.059
5082	12.13	10.99	41.47	32.56	22.61	3.494	3.025	5.049	5.089	4.631	3.888
5083	13.66	10.34	42.78	32.66	23.54	4.285	3.075	5.205	5.09	4.719	4.237
5084	12.44	10.83	39.7	31.6	19.47	4.075	3.213	5.17	5.105	4.413	3.992
5086	11.31	6.93	41.66	32.96	21.07	3.403	2.236	4.986	5.221	4.372	3.558
5087	13.89	12.79	45.66	34.94	26.1	4.528	3.28	5.231	5.369	4.983	4.471
5088	14.6	14.07	42.42	40.6	27.61	4.405	3.941	5.399	5.629	4.847	4.666
5089	14.19	14.37	46.24	35.42	27.55	4.742	3.57	5.697	5.66	4.949	4.746
5090	12.54	9.87	40.94	32.56	22.29	3.708	2.905	5.206	4.869	4.485	3.915
5091	16.61	19.02	48.99	40.72	32.59	5.701	4.619	5.635	6.086	5.61	5.536
5092	10.1	5.36	39.94	28.55	18.03	2.997	2.297	4.871	4.827	4.12	3.332
5093	14.82	15.29	47.15	36.92	28.7	5.013	4.2	5.634	5.594	5.236	5.032
5094	15.75	17.85	47.87	37.08	30.52	5.036	4.676	5.605	5.615	5.066	5.08
5095	13.23	12.02	49	35.88	27.24	4.358	3.573	5.51	5.789	4.956	4.614
5096	14.59	15.78	45.87	42.1	29.79	4.892	4.052	5.925	5.982	5.47	5.079
5097	13.34	12.62	42.18	39.44	25.83	4.247	3.932	5.504	5.875	5.283	4.727
5098	10.65	6.08	37.11	30.71	17.74	3.436	2.46	5.048	5.128	4.495	3.681
5099	17.16	20.1	51.68	41.4	34.38	5.312	4.376	5.867	6.067	5.822	5.377
