# Supplementary material for: Multi-Trait Genomic Prediction Improves Predictive Ability for Dry Matter Yield and Water-Soluble Carbohydrates in Perennial Ryegrass
Source: Front Plant Sci. 2020 Aug 7;11:1197. doi: 10.3389/fpls.2020.01197 (PMC7426495; doi:10.3389/fpls.2020.01197)
Supplement: Supplementary file 3 [file DataSheet_2.csv]

5029	5028	5027	5026	1059	1058	1056	5021	5020	1053	1052	5025	1051	1050	5024	5023	5022	1057	5039	5038	5037	1069	1068	1067	1066	5032	1065	5031	1064	5030	5036	1061	5034	1060	5033	5007	5006	5005	5004	5009	4090	4091	4094	4095	1076	1075	4092	1074	4093	4098
1.10131163728884	0.092152859698122	0.128522609577301	0.127463617106019	-0.0406177444039307	-0.0319900740790428	-0.0401921131950736	0.119760279156272	0.0348102313707455	-0.0679844671270601	-0.0352710285087721	0.303942785796701	-0.026036059535534	-0.0468727187153967	0.228480982623833	0.331236383077827	0.115044464105537	-0.0383142820095297	0.121126495008874	0.213155851202885	0.336219659554197	-0.0523298454361294	-0.0756869940333812	-0.00604267638327568	-0.0103784336731384	0.0167950270990456	-0.0552772477754613	0.0560724742405629	0.0102561715228428	0.011845318020056	0.0946579712693556	-0.0233867463580093	0.0581663296530582	-0.00213362352844491	0.0546300775335526	0.0881653829878548	0.097216228877472	0.113844573384135	0.124853475092272	0.0629691460473007	-0.0063459660746245	-0.0767718846109885	-0.0245848289331332	-0.0263113060881245	-0.0234067004290492	-0.0792706236348112	-0.0682508421315083	-0.037473782382767	-0.0103731792907269	-0.0471760701403249
0.092152859698122	1.107409981435	0.516723930764501	0.474115656486529	-0.0174879019190897	-0.00597239608845415	-0.0316443580183508	0.527096292576913	0.10878733518713	-0.004575038981039	-0.0170413296763196	0.0196582163846218	-0.0132262748645779	0.00131993708748644	0.0549579636509462	0.0379607788394403	0.10774256168915	0.00960917535588063	0.095986716447073	0.0377152982932785	0.0760620637782861	0.00866043048926041	-0.0122808798759538	-0.0290514165629214	-0.0431104196149685	0.064490991779071	-0.00321848744691377	0.0278636429539955	-0.0294091943311983	0.0970771033479077	0.468005101159984	-0.0533729085039489	0.0672411255056554	-0.00303094569451782	0.0757294517089662	0.139914460697116	0.101547049532996	0.0497508140484369	0.0683853002673103	0.0471942773737085	-0.000855947581221973	-0.0366374330045708	-0.0458672603772072	-0.0335716461174739	-0.0397651449812081	-0.0465730395777257	-0.0396010610338696	-0.0162669103063568	0.000610448317041141	-0.0456782852903597
0.128522609577301	0.516723930764501	1.07110078785419	0.555762447546828	-0.00166108746704285	-0.00111191708215722	-0.0228942131904823	0.455487984156549	0.189638272084284	-0.0392151683984951	-0.0440830587816919	0.0611360419012593	-0.0178405635813784	-0.0204033878604899	0.0748884021756969	0.0606403245947143	0.169309397612558	-0.0195286493760641	0.116565195575943	0.0558132595283682	0.119644860025704	0.0119513109355492	-0.0147323537300774	-0.00303837882196961	-0.0407669898058749	0.0820691414650757	-0.0124470625972564	0.0251653521647173	-0.0211003717480993	0.132357995064003	0.476619778291964	-0.0673850779025005	0.0949979418293092	-0.00427990298637396	0.0271613486505458	0.130433964072122	0.134453502556091	0.0438664306685499	0.0691581109640021	0.0681889855888525	-0.0429242482481113	-0.0471931382488472	-0.0483289480406511	-0.0334616461017285	-0.0744302777918587	-0.0529998118960722	-0.0346909370505434	-0.025446042403532	-0.0409178301080097	-0.0660753924042483
0.127463617106019	0.474115656486529	0.555762447546828	1.08984539611416	-0.0248070874547753	-0.0121917513401133	-0.0405134033819169	0.423143175323094	0.140259546925601	-0.0576991427203565	-0.0423013187940335	0.0659120657693649	-0.0249538270303719	-0.0514196922039627	0.0632169218742956	0.0883061557915043	0.164046341335923	-0.0405847550951688	0.141137987620068	0.0471016090850602	0.128764802197564	-0.0173808001522388	-0.0491981293978861	-0.0239202207820063	-0.0432931747324714	0.0944307976883089	-0.0359068023739723	0.0595286136250557	-0.0443917219177095	0.128820169818943	0.378358546869775	-0.087859567419409	0.105217689086977	-0.00231324610804954	0.038851824003883	0.139490510721253	0.193332696666045	0.0630020541380603	0.109495587170658	0.0638077703770848	0.00492857373933097	-0.0540374077844617	-0.0369362409229882	-0.028192158402916	-0.0928316750693535	-0.0639383026344679	-0.0443350770970216	-0.0483630888880688	-0.0316984184490844	-0.0680321999405847
-0.0406177444039307	-0.0174879019190897	-0.00166108746704285	-0.0248070874547753	1.0655214554465	0.131177083409562	0.165327057877644	-0.0365908412498745	-0.0250849675036196	0.475771501534015	0.0845536257768814	-0.0359900964163774	0.107409030563338	0.325219528973549	-0.0300335232186186	-0.0656408032650806	-0.0337692178139832	0.30827096696685	-0.0256002254196359	-0.0527907034399548	-0.0516734995780096	0.2911156651912	0.391716979171974	0.0836593663253578	0.0133056182026307	-0.0392434063281303	0.290314015130225	-0.0188958613006494	0.0906993011039775	0.0280961864149386	-0.0452655578071609	0.128290006013413	-0.0432147528410195	0.0491262135411778	-0.0481960910468636	-0.0284616590457252	-0.0524873710233815	-0.0273101311227076	-0.0366375471778445	-0.0503928938357065	-0.0832543776486054	0.010563086458208	0.0705452133819996	-0.0147464664612734	0.0875912311710898	0.177498933822549	0.0262000964247612	0.248693264650536	-0.0663946425212751	-0.0234866552417003
-0.0319900740790428	-0.00597239608845415	-0.00111191708215722	-0.0121917513401133	0.131177083409562	1.04616875962312	0.168111875475831	-0.00761296795385821	-0.0323306811133968	0.114622716818759	0.190975468030386	-0.0222647759280697	0.170163046153181	0.0924822200311088	-0.0156867017759403	-0.0476656142128908	-0.0206337064085132	0.0907791459949711	-0.0499521840807299	0.00884405507224185	-0.00282047998662322	0.11577772510445	0.150562306048495	0.228838384425992	0.12154754375962	-0.0421766794429525	0.202598787188064	-0.00708007913521829	0.232209869050256	-0.00722308811949484	-0.0130810144980451	0.073075969265471	-0.0352742229195724	0.239698511732467	-0.0152244738937877	-0.0142795523161687	-0.0305774411721485	0.0132616235290034	-0.0122248222120317	0.00452127136950327	-0.0571230687568428	-0.0408023513345252	-0.0725768227211095	-0.0571265882292378	0.0277808364243897	0.200419339703446	-0.0590698067151317	0.119616563104425	-0.0599824595015854	-0.0765914956943226
-0.0401921131950736	-0.0316443580183508	-0.0228942131904823	-0.0405134033819169	0.165327057877644	0.168111875475831	1.14295778347427	-0.0478209732805455	0.00254295063495978	0.140345182161876	0.078493550077664	0.014258335672651	0.0622322022640159	0.0673339145287121	0.0590121116316566	-0.0132734778640434	-0.0183538485428612	0.0490602670317191	0.0136899894547514	0.020489885353362	-0.0172022987233315	0.0682049881789898	0.194538853742927	0.156229185578057	0.0746883055235309	-0.05217201967353	0.119334704120145	0.00432158806583964	0.139732797213962	-0.0438132220435766	-0.0385684868557044	0.423593508342658	-0.0388377638796614	0.0971972172593851	-0.0539719503683597	0.0124780570838426	-0.0408485939698965	-0.0161746733237652	-0.0304973691388395	-0.058888555659775	-0.0796954144902452	-0.0321909359940013	-0.04121809852054	-0.0255497853140075	0.510442124990989	0.208442028729137	-0.0484515202342762	0.0532886804463552	-0.0714816761904688	-0.0908033957951399
0.119760279156272	0.527096292576913	0.455487984156549	0.423143175323094	-0.0365908412498745	-0.00761296795385821	-0.0478209732805455	1.11758291030561	0.133008922735774	-0.0113329446291835	-0.0235525583738849	0.0219848644529833	-0.00756340965822135	-0.0161308515417838	0.0948826965712462	0.0374265103286946	0.112829697772378	-0.00352243310039874	0.0808912260572157	0.0844233746259586	0.0957133660764788	-0.0213256122683783	-0.0314984721384372	-0.035026481058228	-0.0527076832551915	0.0898102690653255	-0.0225693441052252	0.0493817463275334	-0.0187210987078394	0.149473953095127	0.500171616346923	-0.0514868322692268	0.0880640775236136	-0.0300911654186679	0.119669635930572	0.152743605322416	0.125766609043812	0.0634895745713672	0.111362714849742	0.118059223462252	-0.000891236249831812	-0.0378176114814333	-0.0525843515610372	-0.0377782767876658	-0.0404407184485034	-0.0630129924827441	-0.0543588041410696	-0.0385482586534253	-0.0133369639442289	-0.0439699091429618
0.0348102313707455	0.10878733518713	0.189638272084284	0.140259546925601	-0.0250849675036196	-0.0323306811133968	0.00254295063495978	0.133008922735774	1.05792484135922	-0.0676846742304267	-0.0547914702858323	0.03577469468325	-0.0280588459372174	-0.0435377920684984	0.107258604434542	0.0124845722984812	0.0524573770864057	-0.0483940766521373	0.154761419837686	0.0909541462738302	0.00893636495156943	-0.0220724225331638	-0.0387501697886959	-0.014036125928066	-0.0399869999039816	0.102247460003392	-0.0465871740767638	0.0877064008474251	-0.0477281793816401	0.080239209130722	0.163031880456733	-0.0400144643001078	0.0554231196392942	-0.0364549261839437	0.0962095246965398	0.0968466055339982	0.0996922009786968	0.0187979272174389	0.0256921894205007	0.0321715323228324	-0.00305750052406373	0.0325219923042316	0.0458823198422015	0.0295263696499315	-0.0122424475130926	-0.0202997362951543	0.0465360392060887	-0.0514770843755827	-0.019192497789783	-0.00298298129215651
-0.0679844671270601	-0.004575038981039	-0.0392151683984951	-0.0576991427203565	0.475771501534015	0.114622716818759	0.140345182161876	-0.0113329446291835	-0.0676846742304267	1.0971939715146	0.186382621079198	-0.0413243953928378	0.0858824815218067	0.3384319634514	-0.0327708477831983	-0.0713040544983871	-0.022680734799049	0.43789265983527	-0.0237259908260064	-0.031601999204922	-0.0580875395927273	0.243280592527176	0.365400005169963	0.0231100614500751	0.016495961358397	-0.0654018026600677	0.396365572684358	-0.0292119844742514	0.0593861567135951	-0.00550422102478418	-0.0166448879885279	0.140192584604272	-0.0378326150286199	0.0339529000183542	-0.0119734421336869	-0.0236036983037384	-0.0580167901501659	-0.0153798400923418	-0.0301607048269764	-0.0482564596748048	-0.0828440084704018	-0.00586017548051936	-0.0213042404735206	-0.0726394322153719	0.160585050972958	0.18399930362196	-0.0440339437552919	0.260647616420176	-0.0604178552814598	-0.0310690486842204
-0.0352710285087721	-0.0170413296763196	-0.0440830587816919	-0.0423013187940335	0.0845536257768814	0.190975468030386	0.078493550077664	-0.0235525583738849	-0.0547914702858323	0.186382621079198	1.09188255693073	-0.0177911685980505	0.055228338497038	0.201217803314537	-0.0401697206912134	-0.0565489482676541	-0.0355589622524481	0.169939105695991	-0.0104191754301129	0.00725580888072359	-0.00434689222256789	0.124474517647249	0.152312582842633	0.0623082391480038	0.0527477213602621	-0.0596033327891296	0.189428138720393	0.00949822193518281	0.0917367323122821	-0.0291518983707997	-0.00531534917371483	0.107142073619362	-0.0390724327421212	0.240121578552133	0.0149318995016723	-0.000268264554670552	-0.0201105683678371	0.0700212125431916	-0.0145217871839452	0.0264439882469622	-0.0587546009119162	-0.0512934733711061	-0.0955364471749116	-0.0589277004109244	0.13949380882748	0.43223921701819	-0.0826275694561359	0.143430536876852	-0.0313928964078854	-0.0697590466307229
0.303942785796701	0.0196582163846218	0.0611360419012593	0.0659120657693649	-0.0359900964163774	-0.0222647759280697	0.014258335672651	0.0219848644529833	0.03577469468325	-0.0413243953928378	-0.0177911685980505	1.09197814523809	-0.0618193643231835	-0.0565910271311417	0.177002716184714	0.438275825585209	0.138974855234473	-0.0413805337219713	0.106565125130933	0.188223979612436	0.383356729161336	-0.0481586787713317	-0.0338385895677772	-0.0179216623536433	-0.0324450612114606	0.0620458870504692	-0.0418895701742018	0.105577389037441	-0.0369602765578689	0.0278714808610186	0.026636427265281	-0.0190410704656575	0.0708753997390247	-0.0151774866588186	0.0631596246753887	0.113357712709748	0.0746515556978436	0.11251464199634	0.0803031435948767	0.0916642983823201	-0.0289283764937123	-0.0552652783245911	-0.00545353778862616	-0.0281301907500448	-0.0176914297803639	0.00328779069122158	-0.0581243452414568	-0.0554991963628541	-0.00908658228299718	-0.0462105487008391
-0.026036059535534	-0.0132262748645779	-0.0178405635813784	-0.0249538270303719	0.107409030563338	0.170163046153181	0.0622322022640159	-0.00756340965822135	-0.0280588459372174	0.0858824815218067	0.055228338497038	-0.0618193643231835	1.09428291799821	0.108062006893382	-0.0504529188794112	-0.0749703157553237	-0.0794146747357806	0.0396170035361885	-0.0308749766549579	-0.0424193074215398	-0.0375680011154659	0.0264986088367682	0.0284911003997104	0.306715282279058	0.272460722622906	-0.064806412107607	0.0396581610112829	-0.0133168117564948	0.4546778114641	-0.00942706240103417	-0.0043820620950392	0.173865729233076	-0.0301556423106716	0.134459791057478	-0.00826104080392395	-0.0468142796118035	-0.0419116429309908	-0.0135837069459035	-0.00418342515225863	-0.0120132848709586	-0.0134668689839371	0.00798485865705232	-0.019674706526103	-0.055910920211604	0.0987377556611239	0.00264363027538852	-0.0109010347068009	0.120746744747622	-0.0473248943640852	-0.0260832352003728
-0.0468727187153967	0.00131993708748644	-0.0204033878604899	-0.0514196922039627	0.325219528973549	0.0924822200311088	0.0673339145287121	-0.0161308515417838	-0.0435377920684984	0.3384319634514	0.201217803314537	-0.0565910271311417	0.108062006893382	1.10634934360576	-0.0816444760998231	-0.0616703504509915	-0.0534360899030682	0.305646506208609	-0.0355405537960758	-0.0520201634684411	-0.0308684072000854	0.340347366464086	0.31232926842432	0.0410341568624584	0.00366040716872172	-0.0579717344342493	0.443996011028161	-0.0197054738917253	0.0898886789847079	0.00913665453741884	0.00101425693426428	0.11247772308372	-0.0192889976577423	0.0630649334868752	-0.0288289029824024	-0.022635384159189	-0.0419313715938119	-0.00297967737236097	-0.0307242974435687	-0.0205364046277344	-0.0408309832914657	-0.0304870655317283	0.0375824966081858	-0.0208063918175476	0.0702375752134122	0.0906219895626788	0.00381791563795996	0.399845929506461	-0.0484248906385663	-0.00640902544597707
0.228480982623833	0.0549579636509462	0.0748884021756969	0.0632169218742956	-0.0300335232186186	-0.0156867017759403	0.0590121116316566	0.0948826965712462	0.107258604434542	-0.0327708477831983	-0.0401697206912134	0.177002716184714	-0.0504529188794112	-0.0816444760998231	1.12815257698441	0.276572007400546	0.139564564720577	-0.0459865073151222	0.161792897869856	0.454810172977914	0.171810925578922	-0.0520002647619811	-0.0232597203444783	-0.034278362999336	-0.0593074315815439	0.118333385381561	-0.0468666080635528	0.120320572316305	-0.0401318573483075	0.0271013859345399	0.0463984478748246	-0.007459304387195	0.0811763339743419	-0.0544203096030429	0.0499728813662608	0.102783144516284	0.0312780207848052	0.0595918176592162	0.0575695496873611	0.0360089325603194	-0.032669349372437	-0.0785791100017623	-0.0078468806754422	-0.0345496054555647	-0.00148810633879658	0.00820330776471893	-0.0626716757553434	-0.0611302275040738	-0.054610894816856	-0.0522948126196272
0.331236383077827	0.0379607788394403	0.0606403245947143	0.0883061557915043	-0.0656408032650806	-0.0476656142128908	-0.0132734778640434	0.0374265103286946	0.0124845722984812	-0.0713040544983871	-0.0565489482676541	0.438275825585209	-0.0749703157553237	-0.0616703504509915	0.276572007400546	1.12260701660466	0.183429563057926	-0.0629424637285715	0.106447145788076	0.295808064758806	0.518163355646802	-0.0480700701853789	-0.048341205236364	-0.0329399958713852	-0.042166155494208	0.0959384748148882	-0.0469187002297543	0.10013945583926	-0.0557329995434903	0.0676481680683543	0.0340632431664778	-0.0306375118783686	0.0915392207541008	-0.0250664215796428	0.0434697201603047	0.115047200670807	0.0632863281532258	0.133490059770259	0.106016304638256	0.122627908622077	-0.0312502931012681	-0.0710234787787517	-0.0184916171771875	-0.0285581146149717	-0.0475855950847548	-0.0501191865477491	-0.0537481644378229	-0.0659414549715633	-0.0239180079678064	-0.0513114158384487
0.115044464105537	0.10774256168915	0.169309397612558	0.164046341335923	-0.0337692178139832	-0.0206337064085132	-0.0183538485428612	0.112829697772378	0.0524573770864057	-0.022680734799049	-0.0355589622524481	0.138974855234473	-0.0794146747357806	-0.0534360899030682	0.139564564720577	0.183429563057926	1.08226181947945	-0.00470841960856915	0.0912710200475518	0.117338136367279	0.173736159514635	-0.0143556317286717	-0.0261521864975856	-0.0454456097724459	-0.042552860288708	0.0894986101290254	-0.0131115932207047	0.0258156386472597	-0.0716507419184649	0.157869583640272	0.0668052046706997	-0.0624065151602164	0.193876598127229	-0.0194672047451853	0.0549082330623194	0.0982976662139217	0.0594970496364549	0.114972657143649	0.0561617923943594	0.117165052196844	-0.0398671482617063	-0.0446996548399012	-0.0552494228609952	-0.032608744358884	-0.0492384179929763	-0.0376479214789411	-0.0443355511088186	-0.050762488042826	-0.0394408368144026	-0.0299943025197526
-0.0383142820095297	0.00960917535588063	-0.0195286493760641	-0.0405847550951688	0.30827096696685	0.0907791459949711	0.0490602670317191	-0.00352243310039874	-0.0483940766521373	0.43789265983527	0.169939105695991	-0.0413805337219713	0.0396170035361885	0.305646506208609	-0.0459865073151222	-0.0629424637285715	-0.00470841960856915	1.07100417411022	-0.0372907327248418	-0.0436694603934866	-0.0408925393801884	0.268619813893954	0.310568541115916	0.016396595343765	0.00905716219523739	-0.0561152171806382	0.312228377806026	-0.0407413003295835	0.0529607866236235	-0.00484259194123326	-0.00166736133483419	0.0844235398575749	-0.0229035920302666	0.0652143661834818	-0.00140921626361679	-0.0218664261530434	-0.0472852783718407	-0.0182239562556083	-0.0303275155321236	-0.037047174802127	-0.0563888209557344	-0.00342142900131874	-0.0292469151573519	-0.0416056503593295	0.127850503362716	0.121444431187524	-0.0330026172714809	0.244945004813299	-0.0511275393314844	-0.0205961038976853
0.121126495008874	0.095986716447073	0.116565195575943	0.141137987620068	-0.0256002254196359	-0.0499521840807299	0.0136899894547514	0.0808912260572157	0.154761419837686	-0.0237259908260064	-0.0104191754301129	0.106565125130933	-0.0308749766549579	-0.0355405537960758	0.161792897869856	0.106447145788076	0.0912710200475518	-0.0372907327248418	1.15982715291147	0.116853980464854	0.0524671836146995	-0.0545196378892058	-0.059362857464471	-0.0381075732048332	-0.021623580451684	0.07712563262524	-0.0807837390250816	0.322933874864829	-0.00467318947464668	0.0188823633686268	0.113933065955694	0.0825481310005501	0.0641322892338406	-0.0241724705471303	0.0267623911806006	0.141879029546948	0.179629049155064	0.0321380385513147	0.0471908195473697	0.0711549742326285	0.00134118098852113	-0.0487088983167402	0.0101052170330216	-0.0512165415923855	0.106786493607183	-0.010331046984727	-0.0514533562934079	-0.0338675213935237	-0.00419831057925888	-0.024616687752273
0.213155851202885	0.0377152982932785	0.0558132595283682	0.0471016090850602	-0.0527907034399548	0.00884405507224185	0.020489885353362	0.0844233746259586	0.0909541462738302	-0.031601999204922	0.00725580888072359	0.188223979612436	-0.0424193074215398	-0.0520201634684411	0.454810172977914	0.295808064758806	0.117338136367279	-0.0436694603934866	0.116853980464854	1.11041485926398	0.353913912999279	-0.0418702438640307	-0.00277581958854996	-0.0177744399341603	-0.0413238492833475	0.0800549790269439	-0.00985412660269299	0.170469588467664	-0.0361053631136165	0.0218830159470229	0.0749196218433955	-0.0413133186102349	0.0712095545431793	-0.0430443423064299	0.0855797007770818	0.0940711068648971	0.072216783176594	0.123439455942288	0.0745511353993399	0.0939814611987797	-0.0585517929892906	-0.0587598229703703	-0.0263568200666024	-0.0251575422810311	-0.047421229349595	0.0253772310212027	-0.0574912318919171	-0.0500905840245816	-0.0585472047805519	-0.0503682897902491
0.336219659554197	0.0760620637782861	0.119644860025704	0.128764802197564	-0.0516734995780096	-0.00282047998662322	-0.0172022987233315	0.0957133660764788	0.00893636495156943	-0.0580875395927273	-0.00434689222256789	0.383356729161336	-0.0375680011154659	-0.0308684072000854	0.171810925578922	0.518163355646802	0.173736159514635	-0.0408925393801884	0.0524671836146995	0.353913912999279	1.08793757823444	-0.0377947246503153	-0.0409235721976682	0.0159140379281615	-0.0143603734945155	0.0245958925235228	-0.0169350424993352	0.0894429559739257	-0.0135846683116925	0.0386267441363539	0.0691779231732125	-0.0498515384618155	0.0658939862629382	0.0207550612739342	0.0507526667588597	0.130806374977745	0.0949921713677039	0.17953991240539	0.127633232677027	0.14639697927395	-0.0305357693227368	-0.0602309691979818	-0.036371163213123	-0.0417895076511165	-0.0566879917655355	-0.0323825982710177	-0.0540337166119265	-0.0438980389189769	-0.048388497823788	-0.0605995340464872
-0.0523298454361294	0.00866043048926041	0.0119513109355492	-0.0173808001522388	0.2911156651912	0.11577772510445	0.0682049881789898	-0.0213256122683783	-0.0220724225331638	0.243280592527176	0.124474517647249	-0.0481586787713317	0.0264986088367682	0.340347366464086	-0.0520002647619811	-0.0480700701853789	-0.0143556317286717	0.268619813893954	-0.0545196378892058	-0.0418702438640307	-0.0377947246503153	1.00683540264053	0.302202590116104	0.0581729501171115	0.027437962453	-0.0327352075170294	0.321352011395627	-0.0428071747714897	0.0393254110484267	0.0143684332451906	-0.0122874624637563	-0.00180792022733039	-0.0408345493375595	0.0386396006945325	-0.0381297986793726	-0.0403215962712939	-0.0461615882890932	-0.0234452051144625	-0.0443400103017626	-0.0332585209557737	-0.0637214590070514	-0.0230577927796218	0.00849724848850916	-0.00470698020152395	-0.0333315063353988	0.134647498605243	0.0364572345926686	0.269645552949812	-0.0377579194328644	0.0158398373416018
-0.0756869940333812	-0.0122808798759538	-0.0147323537300774	-0.0491981293978861	0.391716979171974	0.150562306048495	0.194538853742927	-0.0314984721384372	-0.0387501697886959	0.365400005169963	0.152312582842633	-0.0338385895677772	0.0284911003997104	0.31232926842432	-0.0232597203444783	-0.048341205236364	-0.0261521864975856	0.310568541115916	-0.059362857464471	-0.00277581958854996	-0.0409235721976682	0.302202590116104	1.0719933018631	0.0721399141635735	0.0687605126585684	-0.0343705021265212	0.397750595726879	-0.0255792773988175	0.0646264284848312	0.00410996746231607	-0.0193889969436293	0.104172755033985	-0.0135176898629362	0.0723674222960373	-0.0329553717294841	-0.0374968936376617	-0.0531208859662645	-0.0250015122563454	-0.0558714488357866	-0.0452538842998056	-0.0757855717371104	-0.0214890966007412	-0.00732228756413821	-0.0442641307940349	0.0635244833798866	0.225237759464093	-0.025529138645103	0.301483668797187	-0.0646790416041668	-0.0392216771797892
-0.00604267638327568	-0.0290514165629214	-0.00303837882196961	-0.0239202207820063	0.0836593663253578	0.228838384425992	0.156229185578057	-0.035026481058228	-0.014036125928066	0.0231100614500751	0.0623082391480038	-0.0179216623536433	0.306715282279058	0.0410341568624584	-0.034278362999336	-0.0329399958713852	-0.0454456097724459	0.016396595343765	-0.0381075732048332	-0.0177744399341603	0.0159140379281615	0.0581729501171115	0.0721399141635735	1.03128737952129	0.454296012560272	-0.0641323604429636	0.0990219051948776	-0.01103166556995	0.531917377067931	-0.0321120986545155	-0.0226568207028196	0.140494816188976	-0.0472156852215579	0.217220515799883	-0.0538646181274047	-0.0267587999557559	-0.0607603287827536	-0.0219892018803114	-0.0284476517212481	-0.024893941202685	-0.0367148020657359	-0.0389174670556378	-0.0652668602095872	-0.0459109752791669	0.0867512750673945	0.0944350715177194	-0.0416226685444617	0.070195688146098	-0.0681481859306074	-0.0854372370667909
-0.0103784336731384	-0.0431104196149685	-0.0407669898058749	-0.0432931747324714	0.0133056182026307	0.12154754375962	0.0746883055235309	-0.0527076832551915	-0.0399869999039816	0.016495961358397	0.0527477213602621	-0.0324450612114606	0.272460722622906	0.00366040716872172	-0.0593074315815439	-0.042166155494208	-0.042552860288708	0.00905716219523739	-0.021623580451684	-0.0413238492833475	-0.0143603734945155	0.027437962453	0.0687605126585684	0.454296012560272	1.06344201988791	-0.05866803115816	0.060523932785855	-0.0083336540275941	0.397705251710764	-0.0390569350552882	-0.0293758386234852	0.0397414481147089	-0.0257758572336128	0.234393556122478	-0.03461418457265	-0.00994169529541668	-0.0265800665777177	-0.00686618403501589	-0.0132075091001096	-0.0203049291572955	-0.0280485455588366	-0.0160762835110797	-0.0632810630603571	-0.0598418987991578	0.078228806083022	0.0810992332557236	-0.0414208566655517	0.0248127593124396	-0.0559306034873589	-0.0567770519363997
0.0167950270990456	0.064490991779071	0.0820691414650757	0.0944307976883089	-0.0392434063281303	-0.0421766794429525	-0.05217201967353	0.0898102690653255	0.102247460003392	-0.0654018026600677	-0.0596033327891296	0.0620458870504692	-0.064806412107607	-0.0579717344342493	0.118333385381561	0.0959384748148882	0.0894986101290254	-0.0561152171806382	0.07712563262524	0.0800549790269439	0.0245958925235228	-0.0327352075170294	-0.0343705021265212	-0.0641323604429636	-0.05866803115816	1.09133741693632	-0.0468373247207895	0.0591286715784233	-0.0910879089304607	0.298422646677085	0.0900185528403409	-0.0905159574844741	0.180501428814421	-0.0500710238609657	0.0407590355714125	0.123657501832404	0.154947363328491	0.0165202893366655	0.0227372400868674	0.0276291020986654	-0.0509419536984536	-0.0279857729118425	0.00371085703925099	-0.0268521591117562	-0.0934101729206921	-0.032814747548121	-0.0219871663449323	-0.0542289878072848	-0.0503873483104781	-0.0259112367556184
-0.0552772477754613	-0.00321848744691377	-0.0124470625972564	-0.0359068023739723	0.290314015130225	0.202598787188064	0.119334704120145	-0.0225693441052252	-0.0465871740767638	0.396365572684358	0.189428138720393	-0.0418895701742018	0.0396581610112829	0.443996011028161	-0.0468666080635528	-0.0469187002297543	-0.0131115932207047	0.312228377806026	-0.0807837390250816	-0.00985412660269299	-0.0169350424993352	0.321352011395627	0.397750595726879	0.0990219051948776	0.060523932785855	-0.0468373247207895	1.08369791500616	-0.0325040325172959	0.107169570578941	-0.00217242528801388	-0.00945995434308045	0.00679696896022574	-0.0163486743074745	0.0551802179548269	-0.0272615313912803	-0.0365586631322503	-0.0572520529579596	-0.00288089070175017	-0.0323754257659583	-0.0252267723647994	-0.0620722202097985	-0.0376471856144574	-0.0342147674712032	-0.0563654824088848	-0.0228970645751816	0.157121145382566	-0.0419739601279194	0.306859291788532	-0.0664869147830453	-0.0378811596938622
0.0560724742405629	0.0278636429539955	0.0251653521647173	0.0595286136250557	-0.0188958613006494	-0.00708007913521829	0.00432158806583964	0.0493817463275334	0.0877064008474251	-0.0292119844742514	0.00949822193518281	0.105577389037441	-0.0133168117564948	-0.0197054738917253	0.120320572316305	0.10013945583926	0.0258156386472597	-0.0407413003295835	0.322933874864829	0.170469588467664	0.0894429559739257	-0.0428071747714897	-0.0255792773988175	-0.01103166556995	-0.0083336540275941	0.0591286715784233	-0.0325040325172959	1.11010874750109	0.00903045754707805	0.0130626430417266	0.0867729255156377	0.0222956391896414	0.0283756125216556	-0.00806699584998562	0.119009724960016	0.152013392348634	0.200581477848447	0.143315081926906	0.0965982635806401	0.10044728198545	-0.0324056007698261	0.00364572700944376	-0.0027200546748145	-0.0273158648979782	0.0192437318330824	0.0153530471998516	-0.0489948482458447	-0.0204672139994571	-0.0158726348619757	-0.0062264359437153
0.0102561715228428	-0.0294091943311983	-0.0211003717480993	-0.0443917219177095	0.0906993011039775	0.232209869050256	0.139732797213962	-0.0187210987078394	-0.0477281793816401	0.0593861567135951	0.0917367323122821	-0.0369602765578689	0.4546778114641	0.0898886789847079	-0.0401318573483075	-0.0557329995434903	-0.0716507419184649	0.0529607866236235	-0.00467318947464668	-0.0361053631136165	-0.0135846683116925	0.0393254110484267	0.0646264284848312	0.531917377067931	0.397705251710764	-0.0910879089304607	0.107169570578941	0.00903045754707805	1.0624846424075	-0.082861400088752	-0.00912247091375284	0.24690233291255	-0.0303129250455213	0.234409680212293	-0.0161998794418459	-0.0234610784462977	-0.0469445393691306	-0.00663833328177053	-0.00336337828689494	-0.0253860605856542	-0.0141953105228904	-0.0505146936960056	-0.0975463486575725	-0.0688381286729577	0.214321264792243	0.0711732156197789	-0.098295080268014	0.145216344277428	-0.0329168060398569	-0.0608235762461362
0.011845318020056	0.0970771033479077	0.132357995064003	0.128820169818943	0.0280961864149386	-0.00722308811949484	-0.0438132220435766	0.149473953095127	0.080239209130722	-0.00550422102478418	-0.0291518983707997	0.0278714808610186	-0.00942706240103417	0.00913665453741884	0.0271013859345399	0.0676481680683543	0.157869583640272	-0.00484259194123326	0.0188823633686268	0.0218830159470229	0.0386267441363539	0.0143684332451906	0.00410996746231607	-0.0321120986545155	-0.0390569350552882	0.298422646677085	-0.00217242528801388	0.0130626430417266	-0.082861400088752	1.14102362212823	0.0909754332807384	-0.0794442845482998	0.138734474327816	-0.00633483720447675	0.00511729221257216	0.134580534960867	0.0672037380925342	0.0568975270277725	0.0334722347128227	0.0602930313843879	-0.0356756485957766	0.00968139260858157	0.0336870671387261	-0.029711537640798	-0.092886805329891	-0.0383550959938373	0.0247200869611894	0.00714736792906072	-0.0419103456930889	0.00416672896134122
0.0946579712693556	0.468005101159984	0.476619778291964	0.378358546869775	-0.0452655578071609	-0.0130810144980451	-0.0385684868557044	0.500171616346923	0.163031880456733	-0.0166448879885279	-0.00531534917371483	0.026636427265281	-0.0043820620950392	0.00101425693426428	0.0463984478748246	0.0340632431664778	0.0668052046706997	-0.00166736133483419	0.113933065955694	0.0749196218433955	0.0691779231732125	-0.0122874624637563	-0.0193889969436293	-0.0226568207028196	-0.0293758386234852	0.0900185528403409	-0.00945995434308045	0.0867729255156377	-0.00912247091375284	0.0909754332807384	1.11553537831272	-0.0406403345293662	0.0940519546484951	-0.00777944869748831	0.132799792685767	0.182000074712596	0.186381476507686	0.0654495370058166	0.111257274186652	0.121830819560412	-0.0100944370695501	-0.0549305823835949	-0.0770393611183853	-0.0557187645177046	-0.0304784782135147	-0.0417107741822451	-0.0485847111362454	-0.0188584444820672	0.0143520902033351	-0.0476922293581175
-0.0233867463580093	-0.0533729085039489	-0.0673850779025005	-0.087859567419409	0.128290006013413	0.073075969265471	0.423593508342658	-0.0514868322692268	-0.0400144643001078	0.140192584604272	0.107142073619362	-0.0190410704656575	0.173865729233076	0.11247772308372	-0.007459304387195	-0.0306375118783686	-0.0624065151602164	0.0844235398575749	0.0825481310005501	-0.0413133186102349	-0.0498515384618155	-0.00180792022733039	0.104172755033985	0.140494816188976	0.0397414481147089	-0.0905159574844741	0.00679696896022574	0.0222956391896414	0.24690233291255	-0.0794442845482998	-0.0406403345293662	1.24875160941816	-0.0256234784562972	0.0585118267927469	-0.0144549886760908	-0.0122205108060804	-0.0254083596842904	-0.00565966484418937	-0.0039834854619776	-0.0422354079660137	-0.00822407901095059	-0.0515589376507738	-0.0673120744090391	-0.0961115955500203	0.624817763799349	0.0675052244374602	-0.072951007052387	0.155226518253576	-0.0128183611042892	-0.0417424011428637
0.0581663296530582	0.0672411255056554	0.0949979418293092	0.105217689086977	-0.0432147528410195	-0.0352742229195724	-0.0388377638796614	0.0880640775236136	0.0554231196392942	-0.0378326150286199	-0.0390724327421212	0.0708753997390247	-0.0301556423106716	-0.0192889976577423	0.0811763339743419	0.0915392207541008	0.193876598127229	-0.0229035920302666	0.0641322892338406	0.0712095545431793	0.0658939862629382	-0.0408345493375595	-0.0135176898629362	-0.0472156852215579	-0.0257758572336128	0.180501428814421	-0.0163486743074745	0.0283756125216556	-0.0303129250455213	0.138734474327816	0.0940519546484951	-0.0256234784562972	1.10152152757744	-0.0221011445526498	0.0698199925312806	0.0633913630651409	0.0842045131558726	0.0513262595732837	0.0750528699039491	0.0422487676368353	-0.00296729510755714	0.0114464605008574	-0.00717712377564853	0.000422586079946572	-0.0407725110664572	-0.0218966858654549	-0.00783829958687641	-0.0242753461305861	-0.0537918209109835	-0.0171993445841591
-0.00213362352844491	-0.00303094569451782	-0.00427990298637396	-0.00231324610804954	0.0491262135411778	0.239698511732467	0.0971972172593851	-0.0300911654186679	-0.0364549261839437	0.0339529000183542	0.240121578552133	-0.0151774866588186	0.134459791057478	0.0630649334868752	-0.0544203096030429	-0.0250664215796428	-0.0194672047451853	0.0652143661834818	-0.0241724705471303	-0.0430443423064299	0.0207550612739342	0.0386396006945325	0.0723674222960373	0.217220515799883	0.234393556122478	-0.0500710238609657	0.0551802179548269	-0.00806699584998562	0.234409680212293	-0.00633483720447675	-0.00777944869748831	0.0585118267927469	-0.0221011445526498	1.06554798838455	-0.0140678569639665	0.0227180028371639	-0.0173149593681882	-0.00236146444928076	-0.0206169348401903	-0.0117278181709035	-0.0531434684276743	-0.0328682646556785	-0.0395920995458285	-0.0475167814744972	0.0846511833540498	0.218312039121918	-0.0379043327060725	0.077537292573745	-0.0813685645502042	-0.0623789769511511
0.0546300775335526	0.0757294517089662	0.0271613486505458	0.038851824003883	-0.0481960910468636	-0.0152244738937877	-0.0539719503683597	0.119669635930572	0.0962095246965398	-0.0119734421336869	0.0149318995016723	0.0631596246753887	-0.00826104080392395	-0.0288289029824024	0.0499728813662608	0.0434697201603047	0.0549082330623194	-0.00140921626361679	0.0267623911806006	0.0855797007770818	0.0507526667588597	-0.0381297986793726	-0.0329553717294841	-0.0538646181274047	-0.03461418457265	0.0407590355714125	-0.0272615313912803	0.119009724960016	-0.0161998794418459	0.00511729221257216	0.132799792685767	-0.0144549886760908	0.0698199925312806	-0.0140678569639665	1.07153306013974	0.0589012703539547	0.139926451689475	0.0595992571626153	0.108921712380564	0.0871677413799446	-0.0142209503765859	-0.0128866227871841	-0.0428761848501049	-0.0259118271003593	-0.0389269726916559	-0.0163539341747229	-0.0382927224436267	-0.0562058292666998	-0.0256677044272273	-0.0309478245720489
0.0881653829878548	0.139914460697116	0.130433964072122	0.139490510721253	-0.0284616590457252	-0.0142795523161687	0.0124780570838426	0.152743605322416	0.0968466055339982	-0.0236036983037384	-0.000268264554670552	0.113357712709748	-0.0468142796118035	-0.022635384159189	0.102783144516284	0.115047200670807	0.0982976662139217	-0.0218664261530434	0.141879029546948	0.0940711068648971	0.130806374977745	-0.0403215962712939	-0.0374968936376617	-0.0267587999557559	-0.00994169529541668	0.123657501832404	-0.0365586631322503	0.152013392348634	-0.0234610784462977	0.134580534960867	0.182000074712596	-0.0122205108060804	0.0633913630651409	0.0227180028371639	0.0589012703539547	1.095588598077	0.291418179546466	0.211710118076112	0.108156533087894	0.0910273970376082	-0.0165025301035951	-0.0769659593351047	-0.0505881288060063	-0.0707011255698227	0.00515570717031974	-0.0174523565308994	-0.070154534157926	-0.0429213091502064	-0.0552983359434298	-0.056136307412923
0.097216228877472	0.101547049532996	0.134453502556091	0.193332696666045	-0.0524873710233815	-0.0305774411721485	-0.0408485939698965	0.125766609043812	0.0996922009786968	-0.0580167901501659	-0.0201105683678371	0.0746515556978436	-0.0419116429309908	-0.0419313715938119	0.0312780207848052	0.0632863281532258	0.0594970496364549	-0.0472852783718407	0.179629049155064	0.072216783176594	0.0949921713677039	-0.0461615882890932	-0.0531208859662645	-0.0607603287827536	-0.0265800665777177	0.154947363328491	-0.0572520529579596	0.200581477848447	-0.0469445393691306	0.0672037380925342	0.186381476507686	-0.0254083596842904	0.0842045131558726	-0.0173149593681882	0.139926451689475	0.291418179546466	1.08830716875726	0.176090332177006	0.187737146076825	0.104747755070663	0.0199098436901309	-0.0349587704082508	-0.0326871630564078	-0.0257080706889077	-0.0500804346886622	-0.0381454936239512	-0.0236496806093443	-0.0428888928930125	-0.0195561254480963	-0.0296326978791327
0.113844573384135	0.0497508140484369	0.0438664306685499	0.0630020541380603	-0.0273101311227076	0.0132616235290034	-0.0161746733237652	0.0634895745713672	0.0187979272174389	-0.0153798400923418	0.0700212125431916	0.11251464199634	-0.0135837069459035	-0.00297967737236097	0.0595918176592162	0.133490059770259	0.114972657143649	-0.0182239562556083	0.0321380385513147	0.123439455942288	0.17953991240539	-0.0234452051144625	-0.0250015122563454	-0.0219892018803114	-0.00686618403501589	0.0165202893366655	-0.00288089070175017	0.143315081926906	-0.00663833328177053	0.0568975270277725	0.0654495370058166	-0.00565966484418937	0.0513262595732837	-0.00236146444928076	0.0595992571626153	0.211710118076112	0.176090332177006	1.08028775118925	0.34947798037647	0.361440241223086	-0.0163769055229395	-0.0532434908921442	-0.0483755156596999	-0.03423656866936	-0.0222320610795035	-0.0186136423941114	-0.0523810806895012	-0.00606934254707604	-0.0578155768167681	-0.0441335074280759
0.124853475092272	0.0683853002673103	0.0691581109640021	0.109495587170658	-0.0366375471778445	-0.0122248222120317	-0.0304973691388395	0.111362714849742	0.0256921894205007	-0.0301607048269764	-0.0145217871839452	0.0803031435948767	-0.00418342515225863	-0.0307242974435687	0.0575695496873611	0.106016304638256	0.0561617923943594	-0.0303275155321236	0.0471908195473697	0.0745511353993399	0.127633232677027	-0.0443400103017626	-0.0558714488357866	-0.0284476517212481	-0.0132075091001096	0.0227372400868674	-0.0323754257659583	0.0965982635806401	-0.00336337828689494	0.0334722347128227	0.111257274186652	-0.0039834854619776	0.0750528699039491	-0.0206169348401903	0.108921712380564	0.108156533087894	0.187737146076825	0.34947798037647	1.08507583941642	0.321473261017428	0.018330691847266	-0.0337563786475929	-0.0222159694421931	-0.027941143948246	-0.011031400316321	-0.0385845192056366	-0.0558060861366371	-0.0315784392722917	-0.0463820380008726	-0.0403145222032874
0.0629691460473007	0.0471942773737085	0.0681889855888525	0.0638077703770848	-0.0503928938357065	0.00452127136950327	-0.058888555659775	0.118059223462252	0.0321715323228324	-0.0482564596748048	0.0264439882469622	0.0916642983823201	-0.0120132848709586	-0.0205364046277344	0.0360089325603194	0.122627908622077	0.117165052196844	-0.037047174802127	0.0711549742326285	0.0939814611987797	0.14639697927395	-0.0332585209557737	-0.0452538842998056	-0.024893941202685	-0.0203049291572955	0.0276291020986654	-0.0252267723647994	0.10044728198545	-0.0253860605856542	0.0602930313843879	0.121830819560412	-0.0422354079660137	0.0422487676368353	-0.0117278181709035	0.0871677413799446	0.0910273970376082	0.104747755070663	0.361440241223086	0.321473261017428	1.09945227489669	-0.0455018686485712	-0.0211883491770447	-0.037831419505584	-0.0334249394989342	-0.0527617285113578	-0.0103096791578813	-0.0425446728697116	-0.0275348711974779	-0.0310501198171681	-0.0257217505363555
-0.0063459660746245	-0.000855947581221973	-0.0429242482481113	0.00492857373933097	-0.0832543776486054	-0.0571230687568428	-0.0796954144902452	-0.000891236249831812	-0.00305750052406373	-0.0828440084704018	-0.0587546009119162	-0.0289283764937123	-0.0134668689839371	-0.0408309832914657	-0.032669349372437	-0.0312502931012681	-0.0398671482617063	-0.0563888209557344	0.00134118098852113	-0.0585517929892906	-0.0305357693227368	-0.0637214590070514	-0.0757855717371104	-0.0367148020657359	-0.0280485455588366	-0.0509419536984536	-0.0620722202097985	-0.0324056007698261	-0.0141953105228904	-0.0356756485957766	-0.0100944370695501	-0.00822407901095059	-0.00296729510755714	-0.0531434684276743	-0.0142209503765859	-0.0165025301035951	0.0199098436901309	-0.0163769055229395	0.018330691847266	-0.0455018686485712	1.1252569483756	0.0865551153744289	0.0397224917991296	0.0451416500680581	-0.00188731670162521	-0.0763773266034302	0.0706570674861122	-0.0498909223793233	0.305655862622181	0.135601105749516
-0.0767718846109885	-0.0366374330045708	-0.0471931382488472	-0.0540374077844617	0.010563086458208	-0.0408023513345252	-0.0321909359940013	-0.0378176114814333	0.0325219923042316	-0.00586017548051936	-0.0512934733711061	-0.0552652783245911	0.00798485865705232	-0.0304870655317283	-0.0785791100017623	-0.0710234787787517	-0.0446996548399012	-0.00342142900131874	-0.0487088983167402	-0.0587598229703703	-0.0602309691979818	-0.0230577927796218	-0.0214890966007412	-0.0389174670556378	-0.0160762835110797	-0.0279857729118425	-0.0376471856144574	0.00364572700944376	-0.0505146936960056	0.00968139260858157	-0.0549305823835949	-0.0515589376507738	0.0114464605008574	-0.0328682646556785	-0.0128866227871841	-0.0769659593351047	-0.0349587704082508	-0.0532434908921442	-0.0337563786475929	-0.0211883491770447	0.0865551153744289	1.14485552000098	0.153910428602584	0.157315826203967	-0.0106285000105135	0.00997032528426115	0.237510336625252	-0.0170312098235768	0.199800463355178	0.143314002717647
-0.0245848289331332	-0.0458672603772072	-0.0483289480406511	-0.0369362409229882	0.0705452133819996	-0.0725768227211095	-0.04121809852054	-0.0525843515610372	0.0458823198422015	-0.0213042404735206	-0.0955364471749116	-0.00545353778862616	-0.019674706526103	0.0375824966081858	-0.0078468806754422	-0.0184916171771875	-0.0552494228609952	-0.0292469151573519	0.0101052170330216	-0.0263568200666024	-0.036371163213123	0.00849724848850916	-0.00732228756413821	-0.0652668602095872	-0.0632810630603571	0.00371085703925099	-0.0342147674712032	-0.0027200546748145	-0.0975463486575725	0.0336870671387261	-0.0770393611183853	-0.0673120744090391	-0.00717712377564853	-0.0395920995458285	-0.0428761848501049	-0.0505881288060063	-0.0326871630564078	-0.0483755156596999	-0.0222159694421931	-0.037831419505584	0.0397224917991296	0.153910428602584	1.13450930450425	0.145653607211502	-0.0573016718065875	-0.0102478912117488	0.185227270373552	-0.000937276026267408	0.0479390570817639	0.1174829006238
-0.0263113060881245	-0.0335716461174739	-0.0334616461017285	-0.028192158402916	-0.0147464664612734	-0.0571265882292378	-0.0255497853140075	-0.0377782767876658	0.0295263696499315	-0.0726394322153719	-0.0589277004109244	-0.0281301907500448	-0.055910920211604	-0.0208063918175476	-0.0345496054555647	-0.0285581146149717	-0.032608744358884	-0.0416056503593295	-0.0512165415923855	-0.0251575422810311	-0.0417895076511165	-0.00470698020152395	-0.0442641307940349	-0.0459109752791669	-0.0598418987991578	-0.0268521591117562	-0.0563654824088848	-0.0273158648979782	-0.0688381286729577	-0.029711537640798	-0.0557187645177046	-0.0961115955500203	0.000422586079946572	-0.0475167814744972	-0.0259118271003593	-0.0707011255698227	-0.0257080706889077	-0.03423656866936	-0.027941143948246	-0.0334249394989342	0.0451416500680581	0.157315826203967	0.145653607211502	1.14327399242336	-0.0646495567185983	-0.0218163358515866	0.183175029221757	-0.04664264736188	0.0871240994569751	0.0475916474447026
-0.0234067004290492	-0.0397651449812081	-0.0744302777918587	-0.0928316750693535	0.0875912311710898	0.0277808364243897	0.510442124990989	-0.0404407184485034	-0.0122424475130926	0.160585050972958	0.13949380882748	-0.0176914297803639	0.0987377556611239	0.0702375752134122	-0.00148810633879658	-0.0475855950847548	-0.0492384179929763	0.127850503362716	0.106786493607183	-0.047421229349595	-0.0566879917655355	-0.0333315063353988	0.0635244833798866	0.0867512750673945	0.078228806083022	-0.0934101729206921	-0.0228970645751816	0.0192437318330824	0.214321264792243	-0.092886805329891	-0.0304784782135147	0.624817763799349	-0.0407725110664572	0.0846511833540498	-0.0389269726916559	0.00515570717031974	-0.0500804346886622	-0.0222320610795035	-0.011031400316321	-0.0527617285113578	-0.00188731670162521	-0.0106285000105135	-0.0573016718065875	-0.0646495567185983	1.2264643903175	0.132507830072206	-0.083570169395558	0.07150712373953	0.0182764291837691	-0.0543726994127266
-0.0792706236348112	-0.0465730395777257	-0.0529998118960722	-0.0639383026344679	0.177498933822549	0.200419339703446	0.208442028729137	-0.0630129924827441	-0.0202997362951543	0.18399930362196	0.43223921701819	0.00328779069122158	0.00264363027538852	0.0906219895626788	0.00820330776471893	-0.0501191865477491	-0.0376479214789411	0.121444431187524	-0.010331046984727	0.0253772310212027	-0.0323825982710177	0.134647498605243	0.225237759464093	0.0944350715177194	0.0810992332557236	-0.032814747548121	0.157121145382566	0.0153530471998516	0.0711732156197789	-0.0383550959938373	-0.0417107741822451	0.0675052244374602	-0.0218966858654549	0.218312039121918	-0.0163539341747229	-0.0174523565308994	-0.0381454936239512	-0.0186136423941114	-0.0385845192056366	-0.0103096791578813	-0.0763773266034302	0.00997032528426115	-0.0102478912117488	-0.0218163358515866	0.132507830072206	1.07420933230503	-0.0330648636163028	0.0593634029512357	-0.0633167143217596	-0.0163231546382601
-0.0682508421315083	-0.0396010610338696	-0.0346909370505434	-0.0443350770970216	0.0262000964247612	-0.0590698067151317	-0.0484515202342762	-0.0543588041410696	0.0465360392060887	-0.0440339437552919	-0.0826275694561359	-0.0581243452414568	-0.0109010347068009	0.00381791563795996	-0.0626716757553434	-0.0537481644378229	-0.0443355511088186	-0.0330026172714809	-0.0514533562934079	-0.0574912318919171	-0.0540337166119265	0.0364572345926686	-0.025529138645103	-0.0416226685444617	-0.0414208566655517	-0.0219871663449323	-0.0419739601279194	-0.0489948482458447	-0.098295080268014	0.0247200869611894	-0.0485847111362454	-0.072951007052387	-0.00783829958687641	-0.0379043327060725	-0.0382927224436267	-0.070154534157926	-0.0236496806093443	-0.0523810806895012	-0.0558060861366371	-0.0425446728697116	0.0706570674861122	0.237510336625252	0.185227270373552	0.183175029221757	-0.083570169395558	-0.0330648636163028	1.13223570606806	0.00742459206568147	0.159583027304028	0.0888043024451106
-0.037473782382767	-0.0162669103063568	-0.025446042403532	-0.0483630888880688	0.248693264650536	0.119616563104425	0.0532886804463552	-0.0385482586534253	-0.0514770843755827	0.260647616420176	0.143430536876852	-0.0554991963628541	0.120746744747622	0.399845929506461	-0.0611302275040738	-0.0659414549715633	-0.050762488042826	0.244945004813299	-0.0338675213935237	-0.0500905840245816	-0.0438980389189769	0.269645552949812	0.301483668797187	0.070195688146098	0.0248127593124396	-0.0542289878072848	0.306859291788532	-0.0204672139994571	0.145216344277428	0.00714736792906072	-0.0188584444820672	0.155226518253576	-0.0242753461305861	0.077537292573745	-0.0562058292666998	-0.0429213091502064	-0.0428888928930125	-0.00606934254707604	-0.0315784392722917	-0.0275348711974779	-0.0498909223793233	-0.0170312098235768	-0.000937276026267408	-0.04664264736188	0.07150712373953	0.0593634029512357	0.00742459206568147	1.07971551843843	-0.0243626695755389	0.0100271603630457
-0.0103731792907269	0.000610448317041141	-0.0409178301080097	-0.0316984184490844	-0.0663946425212751	-0.0599824595015854	-0.0714816761904688	-0.0133369639442289	-0.019192497789783	-0.0604178552814598	-0.0313928964078854	-0.00908658228299718	-0.0473248943640852	-0.0484248906385663	-0.054610894816856	-0.0239180079678064	-0.0394408368144026	-0.0511275393314844	-0.00419831057925888	-0.0585472047805519	-0.048388497823788	-0.0377579194328644	-0.0646790416041668	-0.0681481859306074	-0.0559306034873589	-0.0503873483104781	-0.0664869147830453	-0.0158726348619757	-0.0329168060398569	-0.0419103456930889	0.0143520902033351	-0.0128183611042892	-0.0537918209109835	-0.0813685645502042	-0.0256677044272273	-0.0552983359434298	-0.0195561254480963	-0.0578155768167681	-0.0463820380008726	-0.0310501198171681	0.305655862622181	0.199800463355178	0.0479390570817639	0.0871240994569751	0.0182764291837691	-0.0633167143217596	0.159583027304028	-0.0243626695755389	1.21647346658045	0.238406511176356
-0.0471760701403249	-0.0456782852903597	-0.0660753924042483	-0.0680321999405847	-0.0234866552417003	-0.0765914956943226	-0.0908033957951399	-0.0439699091429618	-0.00298298129215651	-0.0310690486842204	-0.0697590466307229	-0.0462105487008391	-0.0260832352003728	-0.00640902544597707	-0.0522948126196272	-0.0513114158384487	-0.0299943025197526	-0.0205961038976853	-0.024616687752273	-0.0503682897902491	-0.0605995340464872	0.0158398373416018	-0.0392216771797892	-0.0854372370667909	-0.0567770519363997	-0.0259112367556184	-0.0378811596938622	-0.0062264359437153	-0.0608235762461362	0.00416672896134122	-0.0476922293581175	-0.0417424011428637	-0.0171993445841591	-0.0623789769511511	-0.0309478245720489	-0.056136307412923	-0.0296326978791327	-0.0441335074280759	-0.0403145222032874	-0.0257217505363555	0.135601105749516	0.143314002717647	0.1174829006238	0.0475916474447026	-0.0543726994127266	-0.0163231546382601	0.0888043024451106	0.0100271603630457	0.238406511176356	1.11595660083973
-0.00252243431443022	-0.0222102707667864	-0.00599938817143407	-0.0112880818259161	0.112883901879606	0.267681123504622	0.0508466533620012	-0.0412910807927606	-0.0339552771474244	0.0377688492336634	0.0706309957440957	-0.0117024982188052	0.150982828969346	0.126651980632002	-0.0356550466252735	-0.0288561627995401	-0.0133129788007081	0.0915830859197779	-0.0352537331744131	-0.0317215339335857	0.0111721976839173	0.107191216332676	0.122190978726369	0.22488053552222	0.16794769163952	-0.0448218850318581	0.130960756350899	-0.0173166509971971	0.227153822103432	-0.00200634354019331	-0.0330170478919871	0.0790930847230864	-0.0317412697777168	0.384724356543778	-0.038147826141846	-0.022537086079833	-0.0298117476631715	-0.0206082872789696	-0.0339523710479709	-0.0306500221018632	-0.0374731073947317	-0.06120350654896	-0.036817630846706	-0.0418958542659529	0.0516841642484741	0.0760317672478274	-0.0197647295718539	0.15471180036635	-0.0689751615433922	-0.0363374868131195
0.174650568942727	0.115131156461337	0.135077148462379	0.140727393133992	-0.0115593687431268	-0.004644332634263	-0.0342464613568936	0.116778444773433	0.0950306740664968	-0.0242223124794519	0.0380326901813572	0.137246433237688	-0.0452652682943777	-0.0276568929147218	0.0680748852164854	0.103280311298591	0.0860303236586181	0.000677449974440209	0.107597553255198	0.0327200889896194	0.0908272569032389	-0.00742699913646287	-0.0363261292378143	-0.0339601460268119	-0.0302443410439037	0.145546314880478	-0.0299693231931316	0.0861472362680681	-0.032344205235762	0.109932574738204	0.0913840343995982	-0.0658715781151418	0.0924983908405062	0.00550549751583103	0.0720791922221726	0.146204926766461	0.107623165664186	0.111637193527659	0.0726274240241017	0.132344266714419	-0.0605115251508255	-0.0741251353596094	-0.0675916869846007	-0.0566829516980343	-0.0320906431333115	-0.0103049652666508	-0.058030657101101	-0.0290363673591037	-0.0599512042532599	-0.0636085355681032
0.0782855412634625	0.0691307287387276	0.0797372298115002	0.0883881784159265	-0.0467876966214249	-0.0625772114353841	-0.023125412958424	0.0852294513124123	0.0580642227203243	-0.034839572477769	-0.0246801686769557	0.104098205397466	-0.0454127792645344	-0.0316689960551693	0.0580490267098056	0.152906648938453	0.114163868841845	-0.0297197816249164	0.215193173125941	0.0781537663840165	0.122460497000852	-0.0525558711655065	-0.0574117110587827	-0.0637584791248051	-0.0513844961329376	0.12023623585343	-0.0569171393612829	0.172754046868994	-0.0341954795095029	0.121672948497516	0.138985651525547	0.0297631421027533	0.0792940357957088	-0.043551409440957	0.0212123349344254	0.407800880007062	0.244051955914317	0.172947694549031	0.125461832633562	0.176043543638649	-0.0239741109566012	-0.0700156175129588	-0.0333969162247483	-0.0475326968918007	0.0203471460587877	-0.050331194011587	-0.0646367219944266	-0.037227728662002	-0.0155837748909569	-0.0201600807647756
-0.0118984313685	-0.0088914345524338	0.0194347380059636	0.000570711310858479	0.131161520437544	0.272852642784128	0.169129177534861	-0.0316041665651281	-0.04137925647687	0.0720955791400815	0.192484840768144	-0.0225351082346656	0.211649220645487	0.0839239727100986	-0.0392375532440597	-0.0308408272572817	-0.0196065801203867	0.0737802800056159	-0.0537259252117459	-0.0358725889618798	0.0136897456127075	0.0533343951867323	0.090344831414415	0.253135035641619	0.108919629576289	-0.0655164515776386	0.103624905819635	-0.040614054740848	0.274770699051499	-0.00814659256533963	-0.00975465909694156	0.121726487717132	-0.0337763900310726	0.475849584975948	-0.0303892534394626	-0.0233088660596282	-0.0498395294950847	-0.021599530131035	-0.0279546565118774	-0.0182808362430555	-0.0618958811685684	-0.0531799593392996	-0.0355165283403346	-0.0545826365148951	0.0704078618799244	0.190522195586764	-0.0473020682342399	0.115003769561134	-0.0935730669462916	-0.0781932796598002
0.00153998460918523	-0.0329321734172238	-0.0202467845865552	-0.0203837925406558	0.000226171602679482	-0.0838336041572962	-0.0333894263787359	-0.0194393404950721	0.0110661886425563	-0.0383146037017823	-0.0711108455914996	0.0112149884439757	0.00592314927202762	-0.00965215342505368	0.033473330585682	-0.0142726419821262	-0.0224514661407889	-0.0291656373337586	0.000868706519046999	0.0106011901216186	-0.0190142205454	-0.00428773399483989	-0.0312357570902307	-0.0546371159244529	-0.0538162141430049	0.011185504882349	-0.0496713303510238	0.0150909655187318	-0.0729208030357823	0.0540073566836185	-0.0429017351995887	-0.0595016334704633	0.0237429649018873	-0.0445457448823879	-0.0355002854566899	-0.0306868922316423	-0.0192935113519461	-0.0330087359666033	-0.0332228329515489	-0.0344363840354393	0.0316717196570861	0.135084751827007	0.16631792916151	0.134730329547595	-0.0718347028774381	-0.0131850684891634	0.135356088925234	-0.00714109077617041	0.0265595823722138	0.0985193730363927
-0.0636137945216202	-0.0308773265635954	-0.0345847848300126	-0.0424102696832554	-0.00742180000668669	-0.0430194678587565	-0.0558180157429519	-0.0355652341199623	0.0218890036023868	-0.0517244475673182	-0.0499958826220285	-0.0550491742735992	-0.0120496054228474	0.00142273401472238	-0.0814944055565244	-0.0608392941167172	-0.0579553331531988	-0.00613245710190061	-0.0672828459953593	-0.0709301941344201	-0.0557065084248599	0.0248735348531826	-0.0350367024172323	-0.0243794797958378	-0.0325813044861123	-0.0375655127252213	-0.00758758224679596	-0.0635764914814438	-0.034379437665344	-0.00376563044993305	-0.0332122310024273	-0.0612423135615014	0.000917720139636852	-0.0304455786626078	-0.0365923026867044	-0.0735023715514261	-0.0538208442274408	-0.063997730000948	-0.0524971835025959	-0.0432806524463043	0.0633614042105142	0.269650377830018	0.16254691758123	0.166675275232264	-0.0607322961402321	-0.004681137304383	0.409661702931646	0.00974581222735762	0.136553901613039	0.109471547070885
0.128545752321254	0.0269640811557206	0.0737863827630783	0.110074467001019	-0.037864937800093	-0.0605444885589314	-0.0126180806314137	0.037469690118	0.0457043986294799	-0.0453021540012391	-0.0499330166558645	0.161434250358497	-0.0679674776513011	-0.0510057320185274	0.0803673100293417	0.172281986040251	0.0929256983250476	-0.0452106238420289	0.201531296199679	0.0830688513417145	0.128803433855793	-0.0521878190966153	-0.0461250372587389	-0.0584331593294158	-0.0440621985593354	0.171770298038895	-0.060361233856379	0.192008425549771	-0.0529302297909413	0.114479990842548	0.0797791977554803	0.00911561015126197	0.0814047530202331	-0.0305426879011455	0.0397748156173779	0.350048489507166	0.368098738230157	0.133092437021647	0.15251295237605	0.0912516673590906	-0.020920833258952	-0.0842188819918236	-0.0264583970965827	-0.0575335179613875	-0.00651042170156678	-0.0411584037262517	-0.0584105942597932	-0.051661999643843	-0.0492229805823132	-0.0515331002189789
-0.052549763749609	-0.0502729401441314	-0.0464239341884186	-0.0471985987078263	-0.0394976840099246	-0.0407679940606066	-0.00868056753791804	-0.0441785225407913	0.0438676118604437	-0.0598105091978356	-0.0645159061175491	-0.0266830849917023	-0.0386741487399949	-0.0621627962136993	-0.0291961691571621	-0.0365740973179529	-0.0436900313222372	-0.049399119246062	0.00989440321290494	-0.0187587087135452	-0.043444154298981	-0.0321937349230531	-0.0495826597559183	-0.0395785784456206	-0.0562079969666912	-0.0124375463576143	-0.0587831525935254	-0.0295583638770552	-0.0697131977386257	0.00378648696940013	-0.0576944240625852	-0.038719258089426	0.011044609175216	-0.0485913336048795	-0.0529968431823308	-0.0372834428356546	-0.0448499749352948	-0.0727908225441175	-0.0469984318702949	-0.0417540799077677	0.0505056571383669	0.141173991726763	0.092819429035333	0.437245373108727	0.0163700626049402	-0.0213488717736435	0.192764316197388	-0.0662562611257967	0.10655901113536	0.0693558566174852
0.0750855994342672	0.0648549070727945	0.0927071288103835	0.0966343799844892	-0.0344103985545533	-0.0165288125731708	-0.0358889825512995	0.127407790212232	0.0389233702547212	-0.0193441659374365	-0.0301175766857002	0.0982835553654361	-0.0248359818367998	-0.0242451123994457	0.058236615655798	0.0996086822874925	0.270420964118002	-0.0202843895475536	0.0550552071228205	0.0735060361242847	0.100880175285	-0.0431494057001295	-0.0204814347143583	-0.0418017252211038	-0.0210010945087316	0.164518728596821	-0.0087015490316577	0.0523337205284529	-0.0282320221235474	0.204049073370353	0.103735675017959	-0.0213324033807934	0.513995788676148	-0.0287171177321849	0.101443463031031	0.0864714426187098	0.116786164706983	0.0586773414266691	0.0916974831562966	0.0515200454897737	-0.0373442751931695	-0.000829400225804657	-0.0256080725047952	-0.02396374564779	-0.0326307262270263	-0.0082069387082885	-0.0125852952109292	-0.0356139622380274	-0.0508858309301994	-0.0426005109973738
0.118814548129028	0.0895214128454691	0.121198065243064	0.175550231979363	-0.0490270374327281	-0.0324319895403746	-0.00476127105919689	0.0864398788688718	0.191967271377293	-0.0683352131543896	-0.0383907591217668	0.142621599478394	-0.0577642610098004	-0.0679971578937109	0.140128147258659	0.143319326909758	0.128157935057277	-0.0665507464425454	0.218004086784662	0.129722268967219	0.139743432735154	-0.0510596525923254	-0.0607744875917886	-0.0424355427768434	-0.0446486009216721	0.166506036728321	-0.065581524277236	0.187688727183593	-0.0581043792773725	0.1083667550206	0.143609835097116	-0.0252844626132518	0.0874422808263758	-0.0157773802473988	0.0454145714677213	0.222208105709357	0.111931430557687	0.0829472420032193	0.0486956918459129	0.0564643723284432	-0.0658659142453466	-0.0679674658456849	-0.0234653367006436	-0.0572633880513245	-0.0262374668405709	-0.0227284082886827	-0.0709122316908195	-0.0719832438841658	-0.0587602374116662	-0.0449722898478558
0.1145009269753	0.0789727482506223	0.0868111522795212	0.0805816777090064	-0.045160194205574	0.0164274697064283	-0.0382068298204071	0.100912729494876	0.127874592749202	-0.0460941025667064	0.0627164792911104	0.107321270454083	-0.0342786585413743	-0.0252465534973882	0.048266221844292	0.0960492191303217	0.0406052985442291	-0.0301130615825813	0.0892739621821216	0.110924272453746	0.108608195288945	-0.0265016596342697	-0.0408045211612913	-0.037186647098088	-0.0297315516524021	0.140577881986087	-0.0183841851418664	0.170517647972027	-0.030574122395593	0.0788203152442502	0.100358642591157	-0.0561424350666017	0.0724877807661094	0.000746281115926594	0.13362481374436	0.171415450451785	0.121547854532734	0.167909958375315	0.0990248625102091	0.160746727077369	-0.0609039539545908	-0.0494540921952088	-0.0413068400366942	-0.0374782972782853	-0.0623029665318897	0.00903360902185053	-0.0558007304211866	-0.0308748826605662	-0.0453375883287002	-0.0493280062955233
0.0262219027194544	0.0577789818100273	0.0744113217775405	0.0460457196569008	-0.0599885131062964	0.010396616046562	-0.0175720562922733	0.0712703072093814	0.0273843484210894	-0.0361775545467417	0.0564327701150249	0.0996949369442906	-0.0660985343300602	-0.0371660341359843	0.0779739421978869	0.0929459507936373	0.129702788979123	-0.0187820665051634	0.0174316385890751	0.100142819853769	0.0984571635064335	-0.025127482893584	0.0038880620383826	-0.0504629528027778	-0.0551284112513447	0.125780454002827	-0.00043473427617824	0.0737542251302543	-0.0720877029251012	0.112600567948882	0.037483401898511	-0.0768016920078055	0.0936729514461801	-0.00262432952843834	0.117310483087071	0.197329424642461	0.0561238325925383	0.155146445164639	0.0941230690022152	0.122830454359451	-0.0777895432090534	-0.0494737687330339	-0.0597184874636016	-0.0527479301526058	-0.0761925277498348	0.012504770930285	-0.0571774534287772	-0.0411984755558578	-0.0456201010098225	-0.0301976381546565
0.143993645526204	0.119939191176082	0.203245082776136	0.16975680372075	-0.0342221177476601	-0.0155073987723718	-0.019650093900735	0.134312055670383	0.0736875471782815	-0.03963147131799	-0.0612450726502045	0.143274489014971	-0.0588531897290104	-0.0560845833137775	0.0980235765933634	0.190228496788993	0.552796770538004	-0.0161734885497241	0.0754846495085456	0.0859198505804728	0.160911018193762	-0.0158398662749518	-0.0431167212528131	-0.0217311557708188	-0.041008480550324	0.0812076777642733	-0.0242290587488295	0.00322019595271118	-0.0460777655361251	0.155884357444582	0.101805250809858	-0.0647025934439674	0.163191252738172	-0.00720201362495673	0.0765451942564791	0.0725470707336226	0.0519617343642617	0.0878918675843211	0.0426073644711093	0.0827968808138319	-0.0453205059218258	-0.0461714615303565	-0.0650646281915461	-0.0402836302453811	-0.0486162549518647	-0.0583428628333865	-0.0480882693171834	-0.0512618462710709	-0.0322798143939124	-0.0271054238599798
-0.0590677466280123	-0.0114344493823539	-0.0375492952308378	-0.0609263033349525	0.317062396811988	0.134398248096118	0.0991805212756418	-0.020811477106056	-0.0660749607895004	0.461199622995789	0.164919453702491	-0.0366536181874622	0.121633872402905	0.380592073256625	-0.0277466014420903	-0.0577852971134379	-0.037296803951783	0.345917142694209	-0.0173071869663583	-0.0094089569407303	-0.041878120468859	0.217690961643072	0.486286302115945	0.0573162481002404	0.0473783634952087	-0.0581730388157545	0.397460280915308	-0.0149766007925338	0.124488535555621	-0.0214510355032246	-0.0131104729227173	0.212756931165267	-0.023525400381611	0.0617395657834046	-0.0176087320057046	-0.0266743958800877	-0.0437166226251889	-0.0074516137519854	-0.0270577022569476	-0.0382911612902672	-0.0712691025614038	-0.0650489871277381	-0.0487736429508151	-0.0917013794780902	0.16721435218433	0.115944909725796	-0.0625230637382	0.389773880090253	-0.0710780302311431	-0.0582846785562953
0.0221693275976796	-0.00511114196181666	0.0153565162790011	0.00821149017382464	-0.0135537913092264	0.000736249826737382	0.0710356972818299	-0.0083001101501167	-0.00935796312729147	-0.0255850248826496	0.00289364958987402	0.0485066870625612	0.00849665952555818	-0.0229943721767798	0.0580791689578668	0.0290923985083857	-0.00578109413042634	-0.0307368779131889	0.00307953399576921	0.0191545923018263	0.0224246040880946	-0.00983354551761855	0.0201490457984858	0.0276376041890815	0.0125801156606022	0.00309864451974638	-0.00501988159824198	0.00943321251465839	0.0300143797993854	-0.0138856873763663	0.00396913912782276	0.0190964634502043	-0.00902296018804365	-0.0187216347035824	-0.0260991230264186	0.0119227569071311	-0.00769944562460992	0.000190470175757268	-0.00315336487039919	0.00968158043590178	-0.0537513288327992	-0.0596065791520427	-0.0195918599641459	-0.0493915364667075	0.0256620150976356	0.040950244672414	-0.0561498157467537	-0.0112936967455347	-0.0280023303938103	-0.0178891462798323
0.0143811608875688	0.162029178583956	0.0842371574017017	0.0897715381961567	-0.040916550758071	0.00225054088386867	-0.0551819822360779	0.188998081504655	0.0400115173043458	-0.00687543635844362	0.0215513855300296	0.0426001335763212	-0.0210661972734566	-0.0171007078515932	0.0849245173861281	0.0453721140483563	0.120425683653829	-0.00439453721759072	0.0252392429454183	0.101925769155942	0.0821885100923973	-0.0333276723096212	-0.0383585121555449	-0.0442637143507665	-0.0302515664214711	0.171186974001574	-0.0116041609982174	0.0717935777698151	-0.0363368284397385	0.126142224821714	0.250969310090371	-0.0318834680517132	0.122490771016736	-0.012231216935316	0.151946164860931	0.154390362926883	0.101695206590378	0.146423007670448	0.0807233712721277	0.135042675964349	-0.0340859887421368	-0.0363409196272218	-0.0428256377663215	-0.0568402051342585	-0.0486773454902953	-0.0137139741111593	-0.0469803028132762	-0.0239763790996396	-0.0404064152095262	-0.00376033455895793
-0.0340545906746619	-0.00136410049205012	-0.000136093230309007	-0.0154617099982599	0.455492601656857	0.158009705988249	0.0973932081973816	-0.0210187387076013	-0.044937822145454	0.430308651455292	0.28349315847118	-0.0298258187217684	0.0730305171154009	0.44953785530836	-0.0186557059370021	-0.0568970572687372	-0.0133798529425216	0.381726944048584	-0.0355151431403255	-0.0198346733759294	-0.0197352862416411	0.375612218368712	0.358311551037565	0.0626541599231252	-0.0317124591947358	-0.0725643712900021	0.403454873620961	-0.0347719963071722	0.0999482784736535	-0.0183621741265103	-0.0296398322705924	0.136325950405727	-0.0425037407027272	-0.00454777180191074	-0.0234156896538434	-0.064711970016904	-0.0599129944851276	-0.0133832689203275	-0.0311257260220902	-0.0364932312057035	-0.0487459518076998	-0.0295626317014082	-0.0196033051747647	-0.0160190081015841	0.0980996933377579	0.168423279832655	-0.0381832010109871	0.353774499310868	-0.03776135890675	-0.0485352579886361
-0.0754951202178089	-0.0458760471509662	-0.0985304296780434	-0.108660366424675	0.169483066570588	0.0469025612010328	0.212414914619209	-0.0489728681541822	-0.0533611639794477	0.340001875908817	0.313227797069275	-0.0285330349785691	0.0575252520800526	0.170870735926973	-0.0200815689796025	-0.0583441993938131	-0.0762902371335399	0.164526098863143	0.0188119142939315	-0.0143450842228087	-0.0848685358016301	0.0950548459113471	0.163923799368945	0.0262723565289139	0.00671948230899029	-0.0729266867143242	0.165525015458656	0.0202885038642187	0.0956828593058338	-0.0861266852628048	-0.0395915622305008	0.338172887435271	-0.0415007680255186	0.0421977453468804	-0.0367639787531977	-0.0398191430513398	-0.0449598786981328	-0.0284677416773241	-0.0201920014509201	-0.0615176473715913	-0.0192772332062249	0.0069415458678604	-0.0473113489214119	-0.0585098955421387	0.327984909004752	0.303314747648783	-0.0461415261937649	0.198370053524594	0.024657479179184	-0.0260754707318746
-0.0691257791230698	-0.0299642627049061	-0.0577064095575655	-0.0785702016611644	0.356837893217206	0.101373847602405	0.115271931597633	-0.0440058210777297	-0.0663239106465075	0.37880520446512	0.104147199644199	-0.0543221040849589	0.16031847267837	0.385588950872759	-0.0746769969410656	-0.069428729503873	-0.0669081321325328	0.283910658458598	-0.0195964408931584	-0.0600443877826469	-0.0684797272563476	0.276741483272261	0.400061298783969	0.052364745933228	0.045213653584639	-0.0722301166674895	0.28026844841766	-0.0162033260530613	0.113124910058056	0.000402742489305863	-0.0221061727391264	0.263163618737279	-0.0256883095475315	0.0874616278625905	-0.0425287348190969	-0.0382624992624963	-0.0498636201399214	-0.0213316466071531	-0.0417624536360565	-0.0456396121947731	-0.0615030162760392	-0.00779151923314876	0.032628030164843	-0.0472148819914761	0.163611297698693	0.119801662117653	0.0217973558491086	0.431307792402459	-0.0378630159633509	0.00147927014478514
0.064556664903338	0.0793187534893886	0.0818024796494786	0.115224990381256	-0.0347076875652547	-0.000353563079451533	-0.0636963173480338	0.14125177504602	0.0241639047913257	-0.0248361229366387	0.0180269910938752	0.0473149194049811	-0.00808930672005182	-0.000952347614479624	0.0201296743572647	0.100080973877931	0.0725308226046263	-0.0164230665467542	0.0155488637801957	0.075518654891816	0.121295768508177	-0.0106443692371971	-0.0246833325273995	-0.0199606068675149	-0.0121483956997992	0.00790169689500092	-0.00567081728598299	0.011263477241227	-0.0183635359074118	0.0811939667767272	0.15004462312974	-0.0504305467637043	0.0492900955492746	-0.0146819412310559	0.122956288283657	0.0903196637117044	0.100163529168664	0.286798612496861	0.374655988154796	0.421527254419537	0.00467788244747155	-0.0210990739629168	-0.0419132665611746	-0.0454547962672683	-0.044972670832952	-0.0232118233861276	-0.0411558621195893	-0.019448581862741	-0.0410108487647471	-0.0288575709373711
-0.0141324819100829	-0.0459981409208362	-0.0345107222960287	-0.0418721069354503	0.112459426061415	0.144171569869977	0.414616651140682	-0.0405192393725084	0.014309669533748	0.0926765879672019	0.137046091182545	-0.0109354604485111	0.168680158478187	0.102220879520276	0.0358310266050692	-0.0421773862062654	-0.0495994321042	0.0355082552046662	0.0713392776924965	0.012647057355984	-0.0341263815384012	0.00415382045754851	0.0816738249801946	0.140397832654352	0.0746010825976829	-0.0681231909285489	0.0572459532092329	0.0401806375773861	0.22728292449416	-0.0657005085811399	-0.0439455110911522	0.465148120502538	-0.00860091185412533	0.044962496306907	-0.0104226267281396	-0.0132638009541101	-0.0107694600765954	0.00679262220666498	-0.0102526546158221	-0.0375584430354063	-0.0243278726037109	-0.0338223749228661	-0.0321578903706588	-0.0236261078552413	0.447264478161316	0.0706995860912377	-0.0503188561998438	0.111220257454824	-0.0286761101791222	-0.0498303516884094
-0.0731221910154057	-0.0571005295692977	-0.0498878152001556	-0.0601361955607407	0.15449791891741	0.184405608474185	0.260250144817101	-0.0695180124881185	-0.0391869485267009	0.209609473579571	0.459142981761944	-0.00627153524573134	0.00392821318802407	0.0856884702324176	0.00235728337501689	-0.0415581577218175	-0.0412958369100877	0.063996708861354	-0.0154104019939586	-8.17999751962276e-05	-0.0525063838425306	0.131108138718562	0.2053447992626	0.0556634572414731	0.050390383883699	-0.0311145594685392	0.179177014849239	-0.00221288969565631	0.0430663634694381	-0.0367719477509889	-0.0413965029904056	0.187116939891658	-0.0271048054289246	0.170209075633252	-0.0583872205243219	-0.0148230943616038	-0.0341192846478575	-0.0245713500043214	-0.0290766331920544	-0.0333050713712136	-0.109284941851629	-0.0542530156485407	-0.0335099906912702	-0.0605703675191847	0.155845400614972	0.511163104761668	-0.0302536203350784	0.111116094087209	-0.0485095088127013	-0.0532800774205964
-0.00889246238459824	-0.0120871749031353	-0.0495866455038683	-0.0532880791696886	0.136061006527947	0.123974172465185	0.193434593200176	-0.00410289453973657	-0.024102868791665	0.207927817075182	0.265647924666356	-0.0174849670186696	0.178727238315708	0.129107130627011	-0.0238459922070068	-0.0595536255211716	-0.0645106479657214	0.176978070554183	0.0521169403743245	-0.0194484625975025	-0.0303079375943377	0.0578127875783404	0.0541930491146432	0.0365821196332594	0.0586747660810548	-0.0743041293469252	0.0666068097585742	-0.00171361383903568	0.157545272285917	-0.0613488664578355	-0.0221018239421646	0.243365555172158	-0.0207904479849525	0.111476080499095	-0.00214527576724397	-0.00597712282211771	-0.0297258472381074	0.0227708983657056	-0.013121801622646	-0.0197609554345927	-0.00806040446347388	0.0166123685671357	-0.0701151880058604	-0.0303445259284021	0.352839153566181	0.0906902411252851	-0.0425128234823763	0.151115432503882	0.0237380402702187	-0.0358441481995472
-0.0363930151881006	-0.0390235132699037	-0.0368915364758058	-0.0378923830199817	0.0730469305741616	0.159850361200694	0.148677147717899	-0.0462891617560938	-0.0176927451871511	0.0335054109814419	0.0277093816468438	-0.031283987933845	0.261423816395993	0.00211472021718875	-0.019837591145448	-0.0462039512114634	-0.0669075645618319	0.000257969236638873	-0.0158043417907788	-0.0275322229511782	-0.0374655602433245	0.0278430312305187	0.0537816083538317	0.277361777726913	0.397366486117682	-0.0374204206795647	0.065879473949447	0.00288518671423155	0.237511711827325	-0.0428192782520247	-0.0356363492036052	0.033251948891436	-0.00817260101582951	0.130494957228168	-0.0438309166583903	-0.0142187009029608	-0.0150350195976384	-0.047391665162925	-0.0134158559684708	-0.0198483846942457	-0.0493847979019143	0.0281105751218186	-0.0526815868804911	-0.0484701282465698	0.088595946173501	0.10634060038964	-0.0342773941159308	0.0202137148932148	-0.0704553138563683	-0.0511502028084353
0.134369301339656	0.0598616241530823	0.041386146496079	0.0367946209230131	-0.0671331382454969	-0.00587656755827547	-0.0587166625939205	0.105492434403314	-0.0143066426416464	-0.0585835451860729	0.0144604403372832	0.140902284182661	-0.0177455421247002	-0.0418316417685561	0.030143456008572	0.167712974537545	0.114719855852163	-0.0478494629777802	0.0882429200871093	0.095239730776133	0.15124576971992	-0.05942115385949	-0.0717653473678051	-0.0452497084618319	-0.0344531370139507	0.0547821411717166	-0.0671561433109105	0.119677233247134	-0.015719021308776	0.03260691747049	0.121530033888004	-0.00228561835443913	0.117569159510487	-0.0402320473555641	0.110067496662098	0.124664802186282	0.0980542687927842	0.12582029577287	0.101028610954	0.206473034532596	-0.018703218253235	-0.0523048995264478	-0.04446990870281	-0.0393615385346707	-0.0204631853953335	-0.0254666571815587	-0.0500657177883427	-0.0420042022257621	0.0112197065909448	-0.015194221150739
-0.00219045925621198	0.0160332001852289	0.0338762103142074	0.030052515053888	-0.0351368496247708	-0.0211209019323144	-0.0655010772169472	0.0442765121671786	0.0366272343211505	-0.0480085085529342	-0.0217850178620767	0.012439057637468	-0.0491950543312472	-0.0426817411463524	-0.00533266205346719	0.0104064850884815	0.0677885527857595	-0.0164153459878895	0.0425009894131428	0.00498484501484424	-0.000555241368595002	-0.0156887269160568	-0.0297989400419366	-0.0395893807834686	-0.0214116741496808	0.101009440078389	-0.0219270954704064	0.0141287799832359	-0.0807950412647225	0.0739291162081057	0.0159837162356523	-0.0917941360997713	0.120740855361339	-0.0332986705842349	0.0743735583593423	0.0228421613172615	0.0392851231870779	0.0287850207462473	0.0218849058846517	0.0433036166606986	-0.0133759846960895	0.088727455837117	0.0413018201534849	0.0722683885523989	-0.105726369497074	0.00506702963985181	0.0861464506715929	-0.0455078505498868	0.0404516151316203	0.00310430432739216
-0.0588160426319042	-0.01901576670028	-0.0286922815409883	-0.053765744260731	0.362167114616459	0.20386480708529	0.136758399855926	-0.0270709233432938	-0.0689812794088733	0.41829261947703	0.132199670241987	-0.0415931644431629	0.0528373964186759	0.315108969335809	-0.0637349035274891	-0.0600598642483462	-0.0159087283492928	0.394779050613293	-0.0933923662533372	-0.0266780031953514	-0.0250982402704181	0.263387365741425	0.433695125044105	0.149483567750614	0.0964668018259769	-0.0594542141840044	0.529508904677867	-0.0443277712363664	0.150984486471716	-0.00579750612665474	-0.0158293215518312	0.0808161057805118	-0.0247558161872392	0.110379776954223	-0.0224625816290692	-0.0396210719888401	-0.064808299268528	-0.0166753978644523	-0.0509711124032824	-0.037801418418433	-0.066376546357853	-0.0311090059562844	-0.0467073735399278	-0.0849190203122117	0.0461912706976157	0.14997165645615	-0.0534321366049771	0.27218046363817	-0.0640267333710047	-0.0325169645588319
0.117103625363297	0.137805444786289	0.163773983123881	0.132953877325009	-0.0451953441437125	0.00283116802147414	0.0664992608136271	0.185614115169143	0.143716097842754	-0.0385435908855468	0.0139112071937285	0.114135472266464	-0.0126127782711811	-0.0571982006344875	0.0477655101625371	0.100661796613793	0.0343462878898625	-0.0462105121265279	0.0238349789278192	0.0503673370956623	0.146857365081339	-0.067380227115804	-0.0394903758358761	0.0121801923694537	-0.00651376825511369	0.0270993575251735	-0.0508899743059011	0.0467871868276713	0.000369848571447686	-0.00362588191484822	0.117043334485556	0.0358334748355914	0.0167137068186433	0.0531687330915502	0.120222583276463	0.0794083609800301	0.048325682597945	0.0681188407309591	0.0760876433368504	0.0915629847837158	-0.0635014271292181	-0.0331698005734963	-0.0160414467703487	-0.0301134177886551	0.0388735433055779	-0.00452794985152928	-0.074275745588729	-0.0689809340881084	-0.0408906733996073	-0.0615612949520503
-0.0680988423711287	0.013968209531297	0.0268933573846004	-0.0125813181666527	0.465909352436061	0.115404263108241	0.108792240853772	-0.016399507761179	-0.0179584764200232	0.361873013117766	0.12007352722984	-0.0338448681919005	0.0439266479673011	0.342256367273377	-0.0397403978518825	-0.0440863080017054	-0.0246860523976238	0.270189211233321	-0.0308279318208731	-0.0410081374216149	-0.0351083384295193	0.425015508695497	0.525784344560849	0.0557717504549562	0.0323256359222481	-0.0183226958039415	0.402292652245264	-0.0274078450059403	0.0281775123000789	0.0484975154800478	-0.0129595681664429	0.0284315235026744	-0.0384219056706239	0.0264380667772876	-0.0492516373586034	-0.0469209157043412	-0.0571760132312598	-0.0271273034323606	-0.0486252056772288	-0.0452578715297519	-0.080357798408358	-0.0396195057376518	0.0220201878540742	-0.0394973218544588	0.0231485918449881	0.172383819969308	0.00616830041505177	0.247430077955217	-0.0621089403500159	-0.0293746231266935
0.0219561014315063	0.11626391517047	0.116552750103715	0.150294596902134	-0.0548986861818095	-0.00643498918413968	-0.0452976200588759	0.158312628985952	0.111995361160814	-0.063278869832352	0.0190696251023175	0.0241793594615344	-0.0569246398115794	-0.0499793502202898	0.0295816359304746	0.039219876988552	0.049404637399304	-0.0543877230155915	0.0454509511667727	0.0439757092185483	0.0564983113633637	-0.0397538252556828	-0.0218262994000238	-0.0375402471688529	-0.0176047690264199	0.148679593394178	-0.0389185293100412	0.0340901637929586	-0.0716150319359028	0.0917845379399147	0.169922532053537	-0.0803734258231792	0.106541581435218	0.0164872260275055	0.105626045782972	0.126621304090078	0.167229140413787	0.0876527134814731	0.0916205458825174	0.0617280970383094	0.00670204429992784	-0.0216273106205286	-0.0405712409405402	0.0042242269805596	-0.0912889682381967	-0.00346703984428859	-0.00979449754187221	-0.0579265340590135	-0.050676761289212	-0.0509822555201598
-0.0518701696692284	-0.0308801004957803	-0.0412707557677821	-0.0546056423193927	0.400050723784219	0.198274404918696	0.155007814308159	-0.0369807157484545	-0.0605529085930174	0.456561135011704	0.250220880378024	-0.0563860577380653	0.13806796525572	0.39190199885732	-0.0535747944439898	-0.0736752977488159	-0.024183097411434	0.393810734807066	-0.0610976459714809	-0.0398861458227921	-0.0458777138274026	0.319240373091782	0.33579491022657	0.0961734595105255	-0.00232621877714641	-0.0730497228640373	0.415244718190027	-0.0449659036305569	0.170693578981387	-0.00674788863755696	-0.0319705669352288	0.210050158767083	-0.0345650065815912	0.0826760703709088	-0.0209070442877638	-0.0573947560421591	-0.0608366071643365	-0.0214803371456958	-0.0464339410385179	-0.037401360443739	-0.0439222995050338	0.0110653989097771	-0.0503122426490051	-0.0346320425867039	0.0998199951211831	0.128865466256486	-0.00869763538124325	0.422130044054605	-0.02371320200558	-0.0210294404737323
-0.0104475789845814	-0.0116543478520561	0.0139419125364339	0.00426395572755783	0.122948487258603	0.340355597605811	0.120603041712931	-0.0445000883751009	-0.0359637005624347	0.0757877394669179	0.124066568021233	-0.0199467604321642	0.167664379877221	0.103741036766138	-0.054554666268724	-0.0199146983849212	-0.0106288319519407	0.072096112418861	-0.052739623203422	-0.0479570132966028	0.0153442256476642	0.121217247594851	0.0915501969186477	0.247076052643388	0.152379803125277	-0.0690509710247988	0.136340959795284	-0.0301154472325301	0.230805403801685	0.0035555642361062	-0.0296791294105093	0.0837453892869542	-0.047042702958908	0.391138913019073	-0.0542685825940215	-0.0381292333691669	-0.0492590034239456	-0.0274592586770374	-0.0338092733379949	-0.0384976484814105	-0.0716428314490681	-0.0736723836233518	-0.0572178526512381	-0.0410022003947665	0.0634501163900233	0.132691359249983	-0.0417978206095634	0.137563356803212	-0.0784931778053874	-0.0797135791176169
0.0167950215270245	0.105139958820641	0.0594533371922448	0.0867239712653427	-0.0620349838543989	-0.027723022258784	0.00628727893580375	0.175074551983592	0.0381820729401623	-0.0463479492638372	0.000873150706861215	0.00802937930362878	-0.050796304078558	-0.060085944372774	0.0739110159895554	0.0457215302204256	0.070528526973499	-0.0439605574583295	0.0539533662520817	0.0517905339061547	0.0260482753093695	-0.0614015610760181	-0.0362351922594104	-0.0431010663263579	-0.0511560892091358	0.0885665905687671	-0.0600498436073097	0.075590533943864	-0.0331598818922818	0.0100071375320114	0.17863336877828	0.019491498835141	0.133787709249306	-0.0238422003711681	0.0797143351404436	0.0777268894908715	0.141213633320447	0.10876584152498	0.11852121114615	0.0948914721845606	0.0219335822058975	-0.00593886374466526	-0.0275291546990731	0.0267816473134453	0.0255510068701781	0.0265125962280479	-0.029418357187431	-0.0575049558824134	-0.0465092738251879	-0.0252099813279261
-0.0405876716267057	-0.0578595017792991	-0.0338571081755008	-0.0528813780464722	0.102784977384158	0.160929319146855	0.209312672352606	-0.073241353226505	-0.0167961320281195	0.0355372292876401	0.0282646248076424	-0.0181201718324098	0.281247981876059	0.0695986319401106	-0.0249282597663068	-0.0531696759615596	-0.0708387150647918	0.0233876365845538	-0.0180278380526287	-0.0397545401785367	-0.0216182277902545	0.0354832513907099	0.0423163806989675	0.54542725846736	0.344011198105445	-0.063833500317498	0.0720595770050706	-0.0281067187815499	0.423520796221668	-0.0289434633306281	-0.0550502153083003	0.216421077924622	-0.0453948069008505	0.24198329845062	-0.0755758023286563	-0.0266914287842966	-0.0617518573256778	-0.0520673152569604	-0.0470098308344869	-0.0594218744550862	-0.0593531796248945	-0.0328594879093907	-0.03363646056865	-0.0644078392541436	0.163869045064417	0.0739314215105813	-0.0278146157336294	0.10217797965862	-0.0922544104278045	-0.0721552327359666
0.12755694902026	0.114621505055385	0.092333966051859	0.0805777387702981	-0.0476517427530874	0.00247517745869021	-0.0244287537412364	0.144570859224852	-0.00157550772380936	-0.0383579786055688	0.00342512036199545	0.12334592080468	-0.0304366750837378	-0.031236971104886	0.056236866650588	0.0827860549716077	0.108806391294949	-0.029231331099317	0.0440871730974752	0.0894792923160641	0.120922488754863	-0.0343865343492735	-0.0558310907112234	-0.00874021757034099	-0.00495805325847095	0.0887708717803355	-0.0306416481208521	0.0525798155865175	-0.0203326479503747	0.0432544175562101	0.17130690943471	-0.0388593374758129	0.107665685644471	-0.00891717931115379	0.0890563257280393	0.227141899992303	0.134931522094542	0.163990930237579	0.123305390858879	0.0981746134783869	0.000440890916540892	-0.0780483889638642	-0.0679140682769092	-0.0603974538615105	-0.0406156071788003	-0.0277857437424572	-0.058186046315718	-0.0447081862841619	-0.0484742608714783	-0.0718095689497738
0.0845756804933162	0.102276738490644	0.103631503962272	0.106999190029578	-0.0363321751722968	-0.0157160731612572	0.0467439576791316	0.0908962996150554	0.128013733126865	-0.0441288573713867	0.00569561004812638	0.133965440334871	-0.0346187095522121	-0.0523193123690586	0.0282987674289512	0.114569704522793	0.0497881239051241	-0.0427869263412016	0.034203895245592	0.0311470566370556	0.115159069421532	-0.0568392576516694	-0.0384513605165469	-0.00795961754009854	-0.0232293671900977	0.0254762178650259	-0.0538304923787889	0.0664387090950272	-0.0152393743719085	-0.00364146742369955	0.0779995199182669	0.022736693524102	0.0463025447926337	0.029209995775142	0.169503955953083	0.0988799510424305	0.0848093455811992	0.0883962808118595	0.101172657820959	0.0445426968845616	-0.0282141055466375	-0.0414252504487941	-0.0262948775947785	-0.0157478781808657	0.0271169333639977	-0.00861123582626981	-0.0635773855173848	-0.058273387989186	-0.0351804209209309	-0.0627353904186841
0.063659988158505	0.104235298720942	0.145215940096077	0.1308885101697	-0.0262917069091593	-0.000105522506425469	0.0721005048969061	0.127842218606711	0.0972504325981438	-0.0398389253066863	-0.0248609417985213	0.0618589533180126	-0.00510499039710394	-0.0668841941943424	0.0922926804005719	0.0853810924719577	0.0549372301337917	-0.0415719932318429	0.0327989581494631	0.0406726542839444	0.0916347026500698	-0.0543200071622237	-0.0379461217221491	-0.015364639520106	-0.0312168884424118	0.0643262392998831	-0.065356864592878	0.0432827768387761	-0.0233729324105313	-0.00698210772090624	0.0876049983417682	0.0450357552463253	0.0396361689724977	0.016558181139021	0.079040846609184	0.0873010792368631	0.0578110826872432	0.0451611663040626	0.126297997343563	0.100296328086993	-0.0787331995113104	-0.0613654663237791	-0.0512490952013307	-0.0612487977440325	0.0463800710102877	-0.00864712135956677	-0.0707991070626242	-0.0738855676544282	-0.0869380149984031	-0.0712606535738378
0.0576184696939338	0.101572421899124	0.128423762119707	0.105204798052997	-0.0273819178405312	-0.0407076581582409	0.00731477625560133	0.114389216965309	0.0551313384558741	-0.0213728886135017	-0.0294888282639742	0.078145527455186	-0.0545732812024001	-0.029895624414825	0.0923538455134657	0.0744717798513638	0.107020732885495	-0.025281586100606	0.12151510057711	0.0691672038587427	0.0693266350862995	-0.0442938238174642	-0.0238899173240023	-0.0483869893886951	-0.0228478420986257	0.141926759139729	-0.0405424571284432	0.114680594614536	-0.0388866496207295	0.110672174728273	0.132514563827637	0.0213139449962848	0.0588367222247992	-0.00248026395840344	0.0838876826894635	0.435527037052424	0.381778844408945	0.133691109399034	0.12309965353148	0.0242979063337308	0.0243130026982204	-0.0650678653891071	-0.0392888155289731	-0.0722706942178249	0.00902504259159189	-0.0167233786604555	-0.0509917659044385	-0.0447355491156317	-0.0503289058917421	-0.0502937366920682
0.0512776239183562	0.0371113347213668	0.0760653087297949	0.0717255825367013	-0.0232247146141852	-0.00933974156752439	-0.0141579665584023	0.0417141579684427	0.0810045043093543	-0.0329267441357345	-0.00184338822303045	0.0465725433275696	-0.030088747058505	-0.0225054952041299	0.0402075548780861	0.0336631058617969	0.109796215626738	-0.0134496981375309	0.0494021293509348	0.0344383254834627	0.0373798451029194	-0.0106239827185491	-0.0207652904611395	-0.00225711343743356	-0.015653243006636	0.111324284778407	-0.0171552942272644	0.0756362403629814	-0.0293061621848603	0.043718733547916	0.0498981125907592	-0.0311145168872242	0.0381003187286264	-0.00830708379707829	0.0402989792299525	0.104951156552909	0.0789606322674156	0.0592482772656448	0.0219638942299125	0.0838960802934937	-0.0280438507390827	-0.0358092101574661	-0.025875338656781	-0.0244312235812688	-0.0339046700048642	-0.0196223178863832	-0.0237561789253038	-0.0203418801167289	-0.0074272368412319	-0.0188021603521982
0.0519294361365515	0.0919730186594535	0.0730215563728921	0.0648130048193985	-0.0339406508504833	-0.0315217494434825	-0.061090784033384	0.0848183790820961	0.149564491385003	-0.0317844222954659	-0.0563349021342338	0.0738862387773776	-0.0174128714033658	-0.0161567166627736	-0.00620752779472375	0.0563402793767198	0.0573310496913443	-0.0110585366498581	0.0579135580324523	0.0184115051946724	0.0549142764152838	-0.00145798511675282	-0.0467776912761744	-0.0402094291351083	-0.00800311722168135	0.0675711804694737	-0.0180897282671509	0.0506199786772118	-0.0486632835357999	0.0326763918483099	0.143646311897463	-0.0474321668036603	0.0624541516728503	-0.0299089682152217	0.327570829169043	0.0564815384193308	0.0971693070954938	0.0199679539325189	0.0298379218222603	0.0107593063156343	-0.0189749422674977	0.00198729175213114	-0.00196555295594322	-0.0179474308698823	-0.0727562596121444	-0.0379996514476575	0.00519185831014688	-0.0343044440516822	-0.0305088046172984	-0.0135307767872677
0.0971653569693625	0.0893789603155755	0.0762026128149395	0.0586779990827901	-0.049872773546894	-8.68241574708596e-05	-0.0150352785810629	0.126934399761962	0.00154924129113847	-0.0463029996565581	-0.00875726859830355	0.109903898705233	-0.0366709424649084	-0.0506645970425126	0.0855155020677054	0.109564560509835	0.0962533758000023	-0.0400114893583352	0.0852324202154402	0.0936382468442855	0.0995190491968192	-0.0359142223896443	-0.0373315334718071	-0.025114092834538	-0.00963998604270428	0.0290127099681815	-0.0355991317736702	0.0671415695794379	-0.0376853408446119	0.0444134175989423	0.123888969832786	-0.0337993328380733	0.0478903443703904	-0.0129609210384731	0.0693828136841947	0.160660886466564	0.101332133070328	0.131514999686871	0.142221500819494	0.177000828712404	-0.0250005455132318	-0.0498176986129675	-0.0221980415383322	-0.0429190814235449	-0.0357499240707435	5.4864627008076e-05	-0.0507992337481745	-0.0492495051730147	-0.01217858180851	-0.0422334735568323
0.103511772257116	0.0749629154854941	0.138803723348445	0.10756301433771	-0.03193263931066	0.00335959264321625	0.00697713670743332	0.101082812362375	0.148481513752423	-0.0537732075045364	-0.0180714497985071	0.107057274436352	-0.0149409988774833	-0.0617944311537904	0.0506036862650871	0.0863887545730043	0.0806674593127111	-0.0370851842080552	0.0508774291341386	0.0462820150007185	0.112714318755903	-0.0431895582842762	-0.0484782050939292	-0.0038128559019398	-0.00892142258996801	0.0517091429386384	-0.0577164323918647	0.0754212435028	-0.0109518167767732	0.00471471622226211	0.0710725964572054	-0.00953913570439341	0.0335779216438511	0.0353238808410476	0.0892962729489008	0.0875295755770801	0.0526011506285265	0.0637856234995784	0.0953829596281161	0.0831157313668303	-0.0387944767648155	-0.0279322209832782	-0.0107531925882358	-0.0171987561881741	-0.00779016703328861	-0.0160714557131939	-0.0604505886798246	-0.0557706252789452	-0.0547350071559112	-0.0569650685811928
0.0144132989055739	0.171391408822681	0.0765973002832709	0.0947312851985299	-0.020191667150009	0.00632721616010431	-0.0510898040142568	0.183985805900663	0.0225742346031706	0.00116361730624766	0.0183855273730648	0.030911371414555	-0.0250980680555376	-0.00765130745322345	0.0715812677695431	0.0601356027828581	0.0968092753907753	0.0176356782700766	0.0422727263252699	0.0866218270263687	0.0727167797699576	-0.00567884702154706	-0.0247545724134107	-0.0378459735610427	-0.0472101542567535	0.133244605879571	-0.00910743547093328	0.0879816370751889	-0.0416336500062133	0.0937931468297218	0.211402351792729	-0.0421323295522723	0.100550153459302	0.000978142927979952	0.10278235746284	0.183557743886597	0.052419677582708	0.143896641540266	0.0858370480731163	0.0781463495989206	-0.0423106470616402	-0.0491637198175039	-0.0454939670304492	-0.0649346894356409	-0.0371449262249465	-0.0207472529913398	-0.0644114438096941	-0.0062693729020733	-0.0591665478849739	-0.0207530102229089
0.0328027322322833	0.0711618989751415	0.0742575496120047	0.11283672022926	-0.0669627734824914	-0.021476362860643	-0.0733285506348244	0.100928643467315	0.0873056589276551	-0.0671137364900288	0.00899166623235043	0.0542362755999095	-0.034164873673563	-0.0449236546996134	0.0562799742108078	0.0840116087021053	0.061714965161534	-0.0451016724649269	0.0353073905806038	0.0756121623703269	0.0801743654182057	-0.0439025791073313	-0.0421346830801439	-0.0590480030759406	-0.0345870691744296	0.132774758848021	-0.0454815643703099	0.0961093384252211	-0.0534610232811398	0.0928554663996138	0.0771593422460539	-0.0533943104482064	0.0418245489295928	-0.00135477562570298	0.163970562399544	0.182753848939951	0.173950898801568	0.119061271653968	0.168544274137478	0.152712373121944	0.00904978439840226	-0.011276294242766	-0.0344711033926573	-0.028600637824132	-0.0711081813064558	-0.0290712677583549	-0.0224679477607618	-0.0442579240674141	0.00217301745716625	-0.00105132458199539
0.173524416767808	0.186896836699889	0.267865999950341	0.226994717325569	-0.00166245434129866	-0.000260127262509415	-0.0209045129230117	0.224967407056962	0.133871021858697	-0.0124232658304323	-0.00496474841765127	0.119191682369702	-0.0178668420339053	-0.0235082569151751	0.111857243707639	0.110742873901882	0.17407743044487	0.00852362974670103	0.0808935414006469	0.0792390564286628	0.132903586797305	0.000831152455350786	-0.0311434739086009	-0.0155933839576255	-0.0392880599606903	0.145044910370881	-0.0246936112347631	0.0487864250225296	-0.0201246158609157	0.201280739917116	0.160271172574921	-0.0574473610530001	0.0940478505437478	-0.0253978684830672	0.0733735671783398	0.143265138008166	0.105585205544464	0.0619355896877988	0.0453160065814633	0.0506775910927704	-0.057448158390662	-0.0507796927371919	-0.0501777954432967	-0.0374255499989036	-0.0448825540490639	-0.044892257809726	-0.0470764284987464	-0.0292667449730991	-0.056040410051652	-0.0444329401358664
0.0750471173990789	0.0487991899441132	0.0914246360894777	0.077767705253216	-0.0568049186860073	0.00162365491366584	-0.0292788779821443	0.0573811707338099	0.14975913548986	-0.0653831668922732	0.00269894842433693	0.0952401142314141	-0.0308972783380506	-0.0386181529648097	0.0730411211624742	0.0630584481288097	0.157631266778898	-0.0458094850709479	0.100414287605378	0.130893857630345	0.108864067348951	-0.0444564141549904	-0.0403115914337916	-0.0029027772640615	-0.00482757058561829	0.16913834368663	-0.0244049058767857	0.124121559780744	-0.0346233745540258	0.0692484709498606	0.126601802331807	-0.0531613037735936	0.0611170476044406	-0.00197117196378042	0.0659673151743788	0.190594185678662	0.136780764446869	0.135893800924234	0.046350314583391	0.102894529168907	0.00585899233290089	-0.0553459705063052	-0.0542753800185437	-0.0472460723410391	-0.0695918382727979	-0.0172858524179925	-0.0381926447715989	-0.0402429688004547	-0.00101308745118725	-0.0467908982549021
0.0762112379771385	0.100537176685383	0.10874075374541	0.144015038875434	-0.0191119500018141	-0.0198292616029609	-0.00280030289766443	0.0904475391046814	0.169103184689636	-0.0322737645960181	-0.0307941626474334	0.0949581696337746	-0.029118889369275	-0.0221960013859381	0.0436160088466449	0.120648785973355	0.0694369845322218	-0.0254025709401291	0.262755965386642	0.0689844025007375	0.130446436942428	-0.0113126134048283	-0.0387236967945068	-0.0249702454940167	-0.018782062001507	0.0654693819299802	-0.0240697509264015	0.385962326302899	-0.0223534448044245	0.0917864715970875	0.117891705871217	-0.0429635919533974	0.00587539429291923	-0.0107866487770835	0.0477728683188526	0.139865692712371	0.180366323026351	0.119551701806282	0.0830907630378889	0.100515329743216	0.0100152264857529	0.02781540837315	-0.0331652078168493	-0.0251441120102508	-0.00452303508186931	-0.041427248546159	-0.018358385543534	-0.0306708304328749	0.0254567523284649	-0.00861954565167163
0.303959058435104	0.0635638934961525	0.113463630188652	0.115608876867744	-0.0138636273329135	-0.00481601067551184	0.0360440434792773	0.0569532899891271	0.0688400912615147	-0.0369167850716131	-0.0254935082658435	0.30492119649002	-0.0475351647785216	-0.0501816870654651	0.268146673716788	0.238636590606486	0.168382826340191	-0.0491633636555282	0.19270300756289	0.243866503849546	0.261573908306667	-0.0395086877393392	-0.0375102502193138	-0.00637018700710133	-0.0216920943161626	0.0184263428807072	-0.0485522189208306	0.0557609434755721	-0.0183184132556514	0.00131137222209243	0.0531030598488354	0.0160062435906949	0.0505430323824709	-0.0191973454010387	0.0252754799863917	0.124364993234554	0.0727142520067264	0.0895752612675606	0.0731938166697304	0.0656405519292382	-0.0320169489567567	-0.0698285024532609	-0.0148493174281188	-0.054557289386744	0.019772939850466	-0.00832267118340935	-0.0496480875660818	-0.0314498145336381	-0.0256873506513654	-0.0493839463560116
0.0907813283226831	0.0847881203370607	0.121374937506701	0.146274667854631	-0.0608330414092666	-0.0495228768199584	-0.0280424980539742	0.0880498045687333	0.507197443163716	-0.0689654445690488	-0.027175212683984	0.0837113849527091	-0.0472047725888635	-0.0612814624503771	0.128604171224982	0.094802719372557	0.0559885894286512	-0.0491348013768508	0.166490640993206	0.0912341471364826	0.0726180095028711	-0.0482807155947866	-0.0528201646537766	-0.0413704592665245	-0.0324437636468864	0.11139234640639	-0.0562121092082777	0.141983632403721	-0.085605835624319	0.062434769038254	0.127123204419062	-0.074976173847567	0.0727896285876346	-0.010324810181133	0.158914145172067	0.0891535951043229	0.142891814086821	0.0217920282051513	0.0315222675695933	0.031103802458358	0.0156664055886861	0.0356492344276991	0.0395607968746944	0.0377375646038628	-0.0349148862501922	0.00224940827184853	0.0313932197957723	-0.0674683378073327	-0.000947687105618369	-0.00845515781273336
0.183421380197612	0.129339812107123	0.154710434558111	0.122555968770323	-0.0226978428972343	0.0185036745234418	0.0347228925958967	0.153324681951465	0.10727607731711	-0.00846927876523727	0.0120811370397284	0.149203718222245	-0.0265020403510865	-0.03271139314221	0.292572458795515	0.169256855613413	0.0912313996268693	-0.0116059896768158	0.147443743562111	0.368402342481677	0.193227468180739	-0.0128158949409239	-0.00973292922669447	-0.0166109573726604	-0.0454386240310501	0.0611982604297167	-0.0141855916907931	0.134734592455761	-0.0213911763600681	0.0162602287141037	0.115660638862735	-0.0276221045810427	0.0475720981580959	-0.0260981665373729	0.0565492309153395	0.128897544692542	0.0756974727416107	0.123742864715558	0.0588511560665885	0.0831753991817176	-0.0651851094324983	-0.0592267996954567	-0.0280304716837532	-0.0456273711753892	-0.0206850316670323	0.0128219113368694	-0.0570465404476018	-0.0309352041623995	-0.0654310164924901	-0.0591247178216866
0.36221302516115	0.0672249043286504	0.100384635147661	0.0933830709410964	-0.0561579515524638	-0.0530291325028282	-0.00537298214372435	0.0540173403503704	0.0556706668155898	-0.0582002487195497	-0.050343147751878	0.50992984476062	-0.0813112606503124	-0.0661712441600392	0.219804920945679	0.457455346596123	0.201360421883012	-0.0481722275978623	0.107957101861061	0.16779096655028	0.282165509564041	-0.0490015776167885	-0.0419960332837716	-0.0398630565512723	-0.0479324170734075	0.0887085095285586	-0.0450173431443955	0.0367736802316007	-0.0680101082161613	0.0478735545289619	0.0360335228416476	-0.0426744099491876	0.0777826189038054	-0.0146307327983368	0.0681612808276857	0.0758784328854675	0.0332702631810902	0.0583095597107857	0.0843694680684347	0.0437404466588052	-0.0133544422293933	-0.057001480079095	0.00154549595143085	-0.00258920716641614	-0.0519981485671843	-0.0387927965815313	-0.0416569113006661	-0.0627643508252108	-0.0190785770448704	-0.0433414741027063
0.0527093120129932	0.0772872122402184	0.116131259903651	0.0963444271405969	-0.0286715305096001	-0.0329831656348915	-0.00491905955155574	0.0632624770774148	0.178345935312317	-0.0495778044611132	-0.0380831040508519	0.0575158116827197	-0.02643520849765	-0.0265152247763308	0.0621954282584045	0.0704078156181508	0.0495822928727638	-0.0436164137973189	0.0872959307418716	0.037378062893775	0.0465832890001363	-0.0114886395213047	-0.0404597192297147	-0.0322089923784862	-0.0270467506642878	0.0374624689037359	-0.0400643265462862	0.0783840484363398	-0.0481843125589878	-0.00812173806216703	0.118069573449327	0.00251369036322415	-0.00397455865800755	-0.0177216944556432	0.238446442775703	0.0763907414126319	0.102747557676711	0.0653157853283834	0.0806546298735448	0.0594644585846629	-0.014736471625307	-0.04605662898656	-0.0224823169372966	-0.0309512102829371	-0.0230055621362369	-0.011782016041679	-0.0165975123661684	-0.0334646188154058	-0.0273195662171764	-0.0214881219483802
0.111130508744288	0.0764096750854094	0.14077154341846	0.116032755474006	-0.0305721528674375	-0.0140143213871672	0.061614807178908	0.101166114771507	0.114447572023321	-0.0488631370822772	-0.0403372992930392	0.150997708213096	-0.0310325530006406	-0.0648725884465736	0.0969952180258562	0.148820956791021	0.0907265278327687	-0.0473229538176692	0.0911442666683383	0.0731342102242661	0.138349459590441	-0.050336794371642	-0.0546032469773131	-0.0182300665026887	-0.0315657634342174	0.0875674985429431	-0.0626071903692276	0.0938080605008578	-0.0215142677610668	0.0305327788039326	0.121734166382585	0.0392821784353641	0.0618899725551698	0.0129148939057984	0.0802884935380552	0.156197693350088	0.094983923425958	0.071614900039221	0.107251820362656	0.0747164022083747	-0.0389420609784394	-0.0721621849376102	-0.0450064818354286	-0.0645012207584545	0.0457997903064821	-0.0162706185931563	-0.0781823543512737	-0.0724454067506839	-0.0566323190122656	-0.0709967472935394
0.0521208849289331	0.0734592621747889	0.0242914044125406	0.0358800146787147	-0.0477670417573904	-0.0145982329144864	-0.0530703868695454	0.117443521051739	0.0922558966783639	-0.0127423648102191	0.0117969254438051	0.0608969065075634	-0.00730728775585333	-0.0302848959975237	0.0492521174958115	0.0414239221168005	0.0547995183361542	0.000227318276062532	0.0244110605081752	0.0831815974834259	0.0487899125959022	-0.0360770761786955	-0.0329968838695353	-0.053972835965897	-0.031599254932488	0.042380871945114	-0.0281442305760709	0.114378095556705	-0.0181180930625962	0.00202502306954591	0.128609136622024	-0.0166049590515979	0.0715175135509429	-0.0116662505004405	0.796142874124955	0.058829909666556	0.137199444134697	0.0595381885366856	0.109117032976899	0.0886165707003007	-0.012211278546298	-0.0117902145891805	-0.0405730580730534	-0.0260182055567661	-0.0367529552355646	-0.0173977915236899	-0.0370998903555217	-0.0524708491377513	-0.0282822913963993	-0.0321508869132591
0.105856363143175	0.0852730433495059	0.0895789606194539	0.0706008269799463	-0.0523690457591246	-0.00669596490638794	-0.0459343427558417	0.095393653539806	0.00971635115461778	-0.044847521407219	0.0148071610929801	0.147898358498418	-0.0493168781886647	-0.0223769813472839	0.0617602981548323	0.114186184799706	0.13968893287322	-0.0318663489983904	0.0928139166461862	0.097027034853176	0.137555890587731	-0.0344347746204184	-0.0409621094702425	-0.0460784159879332	-0.0374691508503856	0.126380445678478	-0.0256253105801709	0.126959547801094	-0.0502293630955106	0.0543749477808164	0.132690054659815	-0.047139021154974	0.161235158022065	-0.0202446729317741	0.100613269448387	0.244862855294591	0.146347476563256	0.180289242073138	0.0518985448213359	0.14148078133666	-0.0209410324343434	-0.0702420692969225	-0.059535999159913	-0.0647216933046585	-0.0543992306103703	-0.00625923773255229	-0.0597128930036554	-0.0300034047199456	-0.0376920187729952	-0.0534551678098422
-0.0452050097109809	-0.0253885159731184	-0.0186058517960648	-0.0254787923723352	-0.0557317244631393	-0.0118682982113221	-0.0650485729719319	-0.019501025381185	-0.0449709497624342	-0.0471052511515176	-0.0336082565522186	-0.0461295255765605	0.00346260910840031	-0.0458601301262724	-0.0529413803693306	-0.0591523001954073	-0.0333283752198297	-0.0432148729688338	-0.0886609042173718	-0.0380053436911488	-0.0232741641822582	-0.0346785269803347	-0.0617055155072667	-0.0243336937705415	-0.026385710980979	-0.0214457220043515	-0.0269224485477572	-0.0648443812229354	-0.0462773952291793	0.00764815869293203	-0.0238947153269839	-0.114029479413237	0.0246376780397972	-0.0129003259456807	-0.0186808098736857	-0.0450531306913465	-0.0302653877747796	-0.0242341512255651	-0.0266085213895241	-0.0070739358606893	-0.0585757557179249	-0.0348392847858171	-0.0186725554551414	-0.00896282342465908	-0.111216611864252	-0.0680689909921942	0.0286279385469201	-0.0301097574178432	-0.0331972466308988	-0.0416926394353675
0.229172563520178	0.0391804540294646	0.0874163840444952	0.0954447263080518	-0.0262247830200421	-0.0308779495074107	0.0169022901009304	0.0668429328568941	0.113204435459912	-0.0522142608669076	-0.0466469310164414	0.265242752068763	-0.0360435782351404	-0.0498761533800517	0.444668167504499	0.386422737213879	0.16197299320074	-0.0551417455590615	0.180288569708614	0.410287856769007	0.277353076743173	-0.0465475619926052	-0.0393764108749078	-0.0168860002200817	-0.0308591491191657	0.0853923995291553	-0.0467922563596547	0.14447508991484	-0.0246090615999804	0.0487030107678571	0.0971451592514002	0.000669163764036705	0.0952871647150504	-0.0293726283089096	0.0650746304122616	0.162659020100735	0.0799682453870273	0.15209456856433	0.0891857813666212	0.0422085006915527	-0.0214575863317656	-0.0631161529814282	-0.0282365929120539	-0.0540766864658468	-0.00601201962129367	-0.0247462053237101	-0.0553787089792907	-0.0414430770792137	-0.058388192377407	-0.0550132262101491
0.0849727916214816	0.173911301435702	0.0982234182959167	0.113656187310405	-0.0631512999016726	-0.00316203484239499	-0.0309238487332628	0.231564750986723	0.0108569688674766	-0.0408358891506635	0.0116742594381029	0.0799272294824362	-0.0181847864293452	-0.0370176297316547	0.0611589339804158	0.0888708515902013	0.0973547282497173	-0.036111764670186	0.0772820806635866	0.0953098442430864	0.136887439579406	-0.0438356794687553	-0.0667435416778304	-0.0267665404997474	-0.0171529861309447	0.0654815388438187	-0.0421179034369275	0.0475559337463763	-0.0178264957186496	0.0659514379096771	0.252894460201395	-0.0233247256634874	0.0384835198411453	-0.0153779685931185	0.0949092925852631	0.230619322990068	0.137484896016559	0.224912015104947	0.159917974574698	0.188534688414971	0.0302531337941371	-0.0475005965254153	-0.0782447379592277	-0.0551966110841954	-0.0197971617030177	-0.030515925746088	-0.0564734618772828	-0.0478877659001915	-0.0191185710012218	-0.0464044775870798
0.0949681982292388	0.0880255801975548	0.144938864745664	0.110989877567925	-0.0463651324027119	-0.00963022429800471	-0.00259084691818469	0.13982902958957	0.129529792699011	-0.0532180606702364	-0.032781147375561	0.11731371404587	-0.0540889852392649	-0.0612916271465019	0.0757301686965564	0.143703021660733	0.0794437590497464	-0.0406439704053836	0.149756154301333	0.143653201374208	0.153075825083656	-0.0452213694006781	-0.0376637992415692	-0.029833462576831	-0.0358897625298313	0.191482322102773	-0.0535879930257676	0.147384789460678	-0.0474168170911188	0.14046579538383	0.113327315604209	-0.035871265391991	0.0589134261507462	0.00857587276267067	0.0784250648055734	0.174347938029903	0.130738336097546	0.0578040328917759	0.0406559876683039	0.0492331479070867	-0.0441423076106058	-0.0140075215752626	0.0010203210876453	-0.0322155747057736	-0.03709071737875	-0.0187467763997847	-0.0658810208896168	-0.0629116590298315	-0.0514278806847163	-0.0301933453614302
0.163367782421195	0.0877075098337747	0.0493127538628141	0.0815022376679031	-0.0679694516929273	-0.0296599820649277	-0.0394581254044178	0.125738061550347	-0.00924989628128907	-0.0611511173657467	-0.0194942622383774	0.121777229667642	-0.0292396782472205	-0.0395968485183625	0.0328709697206003	0.159199094072296	0.0883612183917805	-0.0416261611630013	0.103983433474797	0.0456642849027486	0.121884090888926	-0.0574971435335854	-0.0797062020196199	-0.0201019528215987	-0.0208352885044284	0.0385025437612908	-0.0618536801845487	0.0622045920921928	-0.00990299618133708	0.0499712041434767	0.168170731705748	-0.000405179437147738	0.0516965869826333	-0.027653401668862	0.0467401539848108	0.144474232209076	0.0777910328200109	0.0898461998811465	0.18729606613279	0.202156002364004	0.0125548956443853	-0.0497013604595839	-0.0523470113544249	-0.0356208936937309	-0.00127511172236962	-0.0522508073774377	-0.0562249692010437	-0.0361709230608235	0.0145983277992675	-0.0211146804563198
0.0491423487634659	0.142211862628375	0.073669464364541	0.0782494129560319	-0.0414955773645802	-0.00645379459442927	-0.00165324801854959	0.180063934926179	0.00252734840340073	-0.0159445574395284	0.0147675695213972	0.102313889664952	-0.022963802534309	-0.0146158937524628	0.0337488685825836	0.0497682881250141	0.0781515205730872	-0.0182458457565234	0.0661947843023145	0.0429377093135844	0.086973282571231	-0.0441988470418881	-0.0530653550614463	-0.0235062958143124	-0.0259979339363301	0.120392031966558	-0.0355740860706507	0.0445379198498648	-0.0130046389864601	0.0229072598335778	0.193922498117246	0.0087267728388824	0.127376169950629	-0.0249141805591434	0.0804604288248197	0.211891178249589	0.135354939234699	0.137170195439215	0.119446905040891	0.0977787555879231	0.00746785889216316	-0.0512713268682022	-0.0680532206186099	-0.0601153986541326	0.0188246053611347	-0.0177743503206457	-0.0760977243579083	-0.0275968882057259	-0.0380766556933826	-0.0591418266090956
0.0292066197277855	0.124800931510213	0.150302714225228	0.168981292904309	-0.0372649733833946	-0.0134550769561845	0.0302332405026255	0.125421866639333	0.0734548576524333	-0.0480503746172777	-0.00239711477690623	0.0368156743563996	-0.0678360001912126	-0.0638837293432892	0.0852599495729409	0.040001468782815	0.0983474788333475	-0.047130949804456	0.0963719040655951	0.0248101103532532	0.0369854364761845	-0.0370779006084285	-0.0288890842883577	-0.044056057011965	-0.0604285509671884	0.118845874726238	-0.0480210827171191	0.0475803482156102	-0.0751115808238114	0.0578350853961556	0.124905200903855	-0.0293690220038446	0.120101803007757	-0.00194856847514016	0.0301720050784477	0.124080120849451	0.156643275328634	0.0749372333199405	0.0552293590342092	0.0379620880705736	-0.0229826924793569	-0.0572481448763488	-0.0390563015698361	-0.0154198544096199	-0.00247787064251217	0.0175658156955461	-0.0516396214294399	-0.0692049302424261	-0.0712544238156492	-0.0648756442500864
0.0120049481373429	0.121091110647895	0.121626709719694	0.0859127586397748	-0.0376331365856264	-0.041045057814826	0.0108656446851535	0.139010792971005	0.0832809650206046	-0.0417994153047361	-0.02774748951286	0.0185014572816566	-0.0509485455417466	-0.0490916557580528	0.072939486501061	0.0519466660208951	0.100123566198677	-0.0364978961736138	0.0705686455670964	0.0359718912012459	0.0127837482316934	-0.0387669830435305	-0.0277649770900695	-0.0460220131787886	-0.0621559765855287	0.0945157797448954	-0.0512142652767081	0.0378783083572749	-0.0513153986921685	0.0508651369161722	0.159644916563417	0.00466915784277732	0.102425994809816	-0.0273167477564548	0.0377111230460209	0.0524995854588566	0.0937757278763201	0.0424349652541237	0.0699312275212176	0.0373534114060985	0.00027919358772075	0.00354159633018393	-0.0126295929083482	0.0336745211241298	0.0117609522074275	0.00264646325992639	-0.0195393134417345	-0.0496461388126902	-0.038908779971245	-0.0182221065587424
0.00966616935531176	-0.0174445504665652	-0.00488621091700437	0.00752202498621488	-0.023967029089409	-0.0200186898613192	-0.0188977269310304	-0.0372041520376559	-0.0143406699137098	-0.0307305651266644	-0.0522643403655969	-0.00733422944523445	-0.0291579819734926	-0.0493095814230402	0.0729550943798104	-0.00572179391819833	-0.00713752199172528	-0.0234775843716182	0.0317590760530094	0.0263702484520242	-0.0346546415287294	-0.0354607339460386	-0.0224718882595485	-0.039089296219988	-0.0251902231633491	-0.0107058028492683	-0.0326323925942072	-0.000115455011697788	-0.0465171469662875	-0.0562295961484447	-0.0388058013395305	-0.054960286654516	0.0268320037893788	-0.0511364640968834	-0.0409787549828628	-0.0243975903050334	-0.035801222630032	-0.0488038192848863	-0.0382576986097791	-0.0438610202543246	0.00213942994869677	0.0793483724520952	0.124207585922373	0.18039155285107	-0.0472902835307678	0.0158812427530042	0.105735805789434	-0.0531231454406897	0.00898362454505946	0.0161119012567846
-0.0279563827396995	-0.0174436223683577	-0.00275215560820232	-0.0188342501453068	0.0341869366683653	-0.0737658346316164	-0.026094084183092	-0.0200225399473491	-0.00346333799578414	-0.0456926170425189	-0.0539862966718148	-0.0428077947846277	0.00393344914161446	0.0413195198467672	-0.0338561128930555	-0.0314101532442358	-0.0293524758582028	-0.0184552179388687	-0.0574736633055204	-0.0597584986678566	-0.0370983882058017	0.0747532130252197	0.00113953825998541	-0.056794525862919	-0.0431867244922379	-0.0108797179390583	-0.0512648270842492	-0.0561357970324481	-0.0822002620966434	0.0383361957096302	-0.032136430334789	-0.0666805368136231	0.00181829770060136	0.00111570065916895	-0.0370600308005694	-0.0623722397940312	-0.0537133573200219	-0.0309798625445278	-0.0527008833692742	-0.0213433177589032	0.0362284621742548	0.0623729405937681	0.184652203658136	0.188481746028798	-0.0836833492053077	-0.0150444482421449	0.147324226486426	0.02366716575165	-0.017009014832687	0.111900209528257
0.0080813294118012	-0.039252986021172	-0.0244275120122196	-0.0333699424375078	-0.0181049090170105	-0.0380621655815486	-0.0305731393915756	-0.0395954858485016	0.0140944836102356	-0.0405178201650149	-0.0709948675573038	-0.000393318841289272	-0.0219471973771948	-0.0545518192065248	0.0777692319346672	-0.0134287515547505	-0.0204233719692929	-0.0342001823091805	0.0427778763959303	0.0251815625919824	-0.0355151219925351	-0.0143301198450111	-0.0179724610051713	-0.0155801228673074	-0.00752966582776241	0.0156828012187697	-0.0475382115389904	0.0344768927270188	-0.0275416534595829	-0.0309616045935942	-0.06683278202076	-0.0718830029926313	0.0241592341692769	-0.0549872796311862	-0.0517928371718123	-0.0312726689987827	-0.0425984505311642	-0.0325615292971727	-0.0294002777218768	-0.0398918130321082	-0.0137971888362177	0.257161127023391	0.130498768340039	0.193382022851734	-0.0417663457915425	0.0272753606293797	0.144535288478503	-0.0419487959859033	0.0524652316822506	0.0460228496675642
-0.00156178035057549	-0.0217430049454278	-0.0123959903342594	0.023121683093153	-0.013591119649347	-0.0252372608000678	-0.00768571527546133	-0.0321057794303852	0.00360686069957435	-0.0430005604125312	-0.066506769376786	-0.0102963069278485	-0.00409982669407935	-0.0265034893085461	0.065568651590962	-0.0139675600765489	-0.0230401804618964	-0.0327658052042376	0.025411845590094	0.0224050157938437	-0.0365841659604021	-0.0294109609500898	-0.0226508937246975	-0.0371752248457196	-0.021154187817347	-0.00012325861224399	-0.0378702675479582	0.00563186420881323	-0.0297568481367176	-0.0452760828689443	-0.0411182299123699	-0.0506176274192509	-0.00454245607346293	-0.0508051637168916	-0.024451371516418	-0.034028428854288	-0.022796303423141	-0.0494803556567787	-0.019018148342825	-0.0480658624758952	0.0523576329126576	0.0797268889154965	0.119976884196554	0.147819335050374	-0.0435380925642084	-0.00395912927037068	0.131940222793461	-0.0341179950152606	0.0350686667125005	0.0309727525772722
-0.0354708186512286	-0.0440653487259335	-0.0213371739304338	-0.0325479222922292	-0.0650635939392876	-0.0634377242520453	-0.00504780500094683	-0.0476839933882123	-0.0146894404599122	-0.0555926269574149	-0.0396000876380277	-0.0227997749895536	-0.10524438989774	-0.081181760267713	-0.00998925504614922	-0.00551329160890846	-0.00156213485601592	-0.0648745142754252	-0.0186330773823663	-0.0200040834945031	-0.0345696244180598	-0.0585437537035975	-0.0389045364953787	-0.0778551162723495	-0.0491237511128521	-0.00562817440591565	-0.0524565738347102	-0.0134797288793781	-0.0935225885289544	-0.0284746596460619	-0.0406590486242105	-0.0407179278935416	-0.013236133632675	-0.0466528400721883	-0.026358746667794	-0.0405907720241658	-0.0156870663853782	-0.0325615813036983	-0.04790390396721	-0.0363337886272027	-0.0765049295084753	-0.0383889622462404	-0.0455969138514874	-0.055833073681461	-0.0324783274915576	-0.0262374732791256	-0.0598166883731459	-0.0782042321865061	-0.0692046390751117	-0.0446593755350643
-0.00893000339117813	-0.0153206169700823	-0.013326914066179	0.00166846215242303	-0.101160970739801	-0.0452413664065368	-0.0288475684664645	-0.0292912238477029	-0.026461121511357	-0.0866101987171938	-0.0368652192146235	-0.0152244885535981	-0.069978011791039	-0.0831625285840174	-0.0471737103172319	-0.0158030142784589	-0.00156060326627367	-0.0729315367931702	-0.0486792363469459	-0.0387858364723172	-0.00865030334267669	-0.0702639252057917	-0.0648200796969385	-0.0515461374439148	0.0195580051439666	-0.0268491433944743	-0.0492537242977657	-0.0519748898027089	-0.0438719158807993	-0.0306012988979025	-0.020155825419161	-0.0773451909585007	-0.0322300214414007	-0.0105705625830757	-0.0115924209628277	-0.0358175591331384	-0.0208600055449108	-0.037333044032062	-0.0189829780428188	-0.050057128274954	-0.0225429164132708	-0.0393329838104388	-0.0821358585273189	-0.0635007372515488	-0.0615382045387064	-0.0503720951714426	-0.0669853690122169	-0.0776407814130367	-0.0623611544840495	-0.0616953989716636
-0.0166620533668827	-0.0307822523169667	-0.0667146720461637	-0.0370011156598768	-0.104934542513061	-0.0752902873973016	-0.0522411393745752	-0.0314547179008745	-0.094759170318817	-0.0530497514567143	-0.0276944931538385	-0.0396387500789837	-0.0496827553422127	-0.0718579968613629	-0.042403291308123	-0.0275063037972223	-0.0108132038973599	-0.0412762715587039	-0.0527094369273213	-0.0236286577637224	-0.0104791666473604	-0.076458900620987	-0.0873131541126288	-0.0568131639881761	-0.00635605562737459	-0.0769345352598688	-0.0558402668568102	-0.0589162201643982	-0.0382831165989484	-0.0709121532910433	-0.0324521576927118	-0.0165462814368658	-0.0591564021876001	-0.0447985701113983	-0.0342736529002604	-0.0675873100290813	-0.0589667081232525	-0.0398283628555502	-0.0217012781199677	-0.0511765482669988	0.129527883512583	0.0064232745109522	-0.0954376855563543	-0.0567089182350803	0.0465321232482673	-0.0826854925342147	-0.0701524551522215	-0.0676064794666321	0.0962594597357995	-0.0055412077211281
-0.0485387071798525	-0.00265845521518786	-0.0154418545270572	0.00348806608873921	-0.0649419955031381	-0.0461747072239255	-0.0578012979290268	-0.0116786296100843	-0.0325940488556818	-0.0592734539650439	-0.0660078694525233	-0.0613126668616404	-0.0395239290424518	-0.0627552356892431	-0.062215740708992	-0.0512765225760275	-0.00326886795686891	-0.0467164253275456	-0.0531436408648759	-0.0592178101997712	-0.0484888496913229	-0.0479226914657639	-0.0578172787866408	-0.0334396920622623	-0.0225298870475851	-0.0325958216311718	-0.0511714869511818	-0.0356564376519428	-0.0460823120498264	-0.0355189293082332	-0.0156193342112051	-0.0707141766192354	-0.0505469507515503	-0.0328073173003104	0.00155216087470561	-0.0536952339087006	-0.0254873986198701	-0.0221768989780877	-0.0115005126715625	0.028837932968477	0.0166162374680458	-0.0218965841994164	-0.0691389996013075	-0.0376869757546913	-0.0559023257667937	-0.0786510456062297	-0.0399774930102284	-0.0531639585601405	0.00267017488050683	-0.0275963318307968
-0.0314269012962097	-0.0419575596011513	-0.0327365881779256	-0.00420665949955186	-0.0866378057288783	-0.0469340708505562	-0.0370877154869052	-0.0434169334658059	-0.0316391740428266	-0.0782788937664632	-0.0299913967582567	-0.0402743529152698	-0.0749710705981466	-0.0737772825189411	-0.0632136322386993	-0.0283739975651537	-0.00251239443568611	-0.0696860866746881	-0.0449135578580884	-0.0409997137547703	-0.0213642626231104	-0.0677480669742609	-0.0646264689387089	-0.0367814431673306	0.014884643272445	-0.0535164688600197	-0.0582720579770976	-0.0239850825650803	-0.0527371014386276	-0.0509292673611266	-0.0199378306018293	-0.0654446542938234	-0.0434588537639043	-0.0211821487162133	-0.0273349706187379	-0.0399650314533795	0.0092410561360252	-0.0309426792758719	-0.00638759868838231	-0.028667976777484	-0.00269132608510042	-0.0402025605896347	-0.0716728189735039	-0.0528868502014017	-0.0650918378231581	-0.0474241898403972	-0.0589105205485287	-0.0797426514616997	-0.0418049123750514	-0.0501638499532037
-0.0101435624309084	-0.0425669068525691	-0.0288131099510097	-0.0304865774571909	-0.0180819160464782	-0.0607912622034975	-0.0478258962746152	-0.0441197278515626	0.0578033869311148	-0.0492790431816203	-0.0664409338006494	0.00439504215622151	-0.0563138979530221	-0.0405019363328083	-0.035270721510141	-0.0215363336398553	-0.0145785103002877	-0.032313080221989	-0.0353735316138229	-0.0470049550966304	-0.0493455180692215	0.0221052799497026	0.00938651511374627	-0.0733066788196817	-0.0643855978848009	-0.0221332973779078	-0.047066341953582	-0.0193817210781439	-0.0993914380661072	0.0174941760122191	-0.0519567383921857	-0.0670382862832735	0.025374598769387	-0.0655540567655326	0.0137951997926843	-0.0637617344293426	-0.0123118190245142	-0.010369270538367	-0.0102850990201444	-0.0147627629316889	0.0360566797317921	0.31231731601321	0.180661877279117	0.159394461888684	-0.103089672082285	-0.00120736549046183	0.403038681536466	-0.0126700015529175	0.0951131808987478	0.111995973666057
-0.00721831336207736	-0.0333055510334652	-0.0392587968440546	-0.0328963046707544	-0.0644504632321488	-0.0344175789829128	-0.00559080549006104	-0.0247194526927894	-0.0557162257893285	-0.0333497300809712	-0.0312494678773054	-0.0242497020918586	-0.0632364132417679	-0.0738641986940145	0.0105560002358377	0.00866717159739826	0.00363879885089215	-0.0389299670583989	-0.0048154760903113	-0.00129473302394441	0.00119741118527434	-0.0504445108759485	-0.064570767932715	-0.0391569185774812	-0.036648343427047	-0.0390795415436131	-0.0602437263064214	-0.0272261292769937	-0.0374898269094575	-0.0606295265654355	-0.0277113589386631	-0.0391398582639729	-0.055855302821788	-0.0450337639171769	-0.0236333969609336	-0.0181428705411595	-0.0379081262566493	-0.029509086337078	-0.0269681419820809	-0.0097391156616202	-0.0101324462910938	-0.0754263915946207	-0.0740575590752983	-0.0486698813798357	-0.0128173487535704	-0.0551103155893173	-0.0816340113810119	-0.0617120786788193	-0.00804049416116991	-0.029348646925084
-0.0300390553465346	-0.0382427842185097	-0.0581120332708852	-0.0558929362694935	-0.0572859334056335	-0.0522110245334299	-0.0643484282762456	-0.0294902910586758	-0.0669653776347083	-0.0199167361667126	-0.0127062978954788	-0.041411688964895	-0.0339307984919184	-0.0253482305188541	-0.0444065969664251	-0.0213409959677418	-0.019219541470127	-0.0022574292675171	-0.0293205466380526	-0.0234888749794614	-0.020389506364396	-0.0489236018048173	-0.0732102854403923	-0.0547511454278698	-0.0522145150149089	-0.0505511763744346	-0.0616253568266329	-0.0461725388759537	-0.0131635324104467	-0.0689042254601059	-0.0298995681579489	-0.00303086475886342	-0.0417925743353584	-0.0554520453612671	-0.00282404847150101	-0.0368693310552733	-0.0448861215695272	-0.0331763480518239	-0.0421113901375143	-0.0218401719475402	0.0148306582213463	-0.0407425047641024	-0.06338781023773	-0.0460102310054563	0.0108742506595629	-0.0762326607043523	-0.0645928952340856	-0.029467050704197	0.0328124787627744	-0.00458114876745597
-0.0145989001467513	-0.032311476251989	-0.0289385533702975	-0.00547404147218649	-0.0990358749862079	-0.0765537515071284	-0.0536595120980894	-0.0470307572886233	-0.0520913729864938	-0.0850389750121181	-0.0776500575191725	-0.0252500055398757	-0.0790265161494136	-0.0988718200583628	-0.0695235493786642	-0.0165693282984347	0.00058467936592134	-0.0741957264462534	-0.0652601874901032	-0.0628359512123745	-0.0164240000129589	-0.0751810430709945	-0.074950889021591	-0.0594717878344435	-0.0108809761984504	-0.0360418017879298	-0.0788327132137701	-0.0621981347571626	-0.0571746394063539	-0.0483206533644028	-0.0400411329060563	-0.102735618237258	-0.0508282126432953	-0.0655672739947776	-0.0195018579411296	-0.0456915917091919	-0.0207624732866017	-0.0376534765677937	-0.0268992912877913	-0.0635799641460068	0.00363838582365675	-0.0463902319106158	-0.0590890277444159	-0.0756600622223362	-0.103827983720638	-0.069607232569381	-0.0649620902252116	-0.10219780703087	-0.0406495216514981	-0.0134879714250624
-0.0298722192162397	-0.0435145812870886	-0.0403933924817648	-0.000833532832684959	-0.0649316696148618	-0.0471255009282778	-0.0661815004043637	-0.044520380575939	-0.0454992807751681	-0.0767207503302783	-0.0648389944464635	-0.0393924973329111	-0.0352160099056861	-0.0602546845551625	-0.0673928267037128	-0.0317190253150533	-0.0121843984211698	-0.0669539750083586	-0.0466040319283035	-0.0617013723746327	-0.0283729142593561	-0.0471812329480996	-0.0665053642182936	-0.0494642085060502	-0.00635572160878057	-0.0461503872663304	-0.0601469865250378	-0.0333840660352952	-0.0363654872828581	-0.0424647135295166	-0.0437418663012071	-0.0737918392346767	-0.055847689926364	-0.0499178694147648	-0.02844417688722	-0.0450953189365453	0.000641817543452217	-0.0206703329068807	-0.00214396272913177	-0.0255959174833143	0.064722067894964	-0.0194479229677765	-0.0437416814645713	-0.0710301772195812	-0.0821106789519439	-0.0740396967147229	-0.0353932417887199	-0.0573093975640607	-0.00755963609781184	0.00669116733586457
0.00828474711070677	-0.0482975805555319	-0.0313319980452313	0.00145470957115009	-0.108249633719647	-0.0617543658335446	-0.0390935687478439	-0.0587832924351305	-0.0239303014705332	-0.0946148664321497	-0.041599206431709	-0.000620003711437841	-0.0967708645298242	-0.0922361644325621	-0.0597661360445346	0.00539537137244647	0.00423932990946203	-0.0816513142938311	-0.0588478894526116	-0.0376568706918143	-0.00368525045387518	-0.0816272562296687	-0.0729338850852258	-0.0518021999466198	-0.0044249354703022	-0.00770589487097858	-0.0630223111518181	-0.0494231098797017	-0.069611364736459	-0.0223584313813207	-0.0367290511939597	-0.0812807669215795	-0.0303054026426128	-0.0254762149703629	-0.0235529758561695	-0.0415222090003254	0.000902143238296875	-0.0352470549069852	-0.0130332661424943	-0.0473275221596716	-0.0126656762916403	-0.0542000997834606	-0.0853080373581439	-0.0363373686622809	-0.0796815293142678	-0.0577362150411599	-0.066410928995602	-0.0930583067012646	-0.0288338166483421	-0.0498117631972786
-0.0447054889989694	-0.0468792310828644	-0.0476221074970442	-0.0408802234593389	0.0233239024340366	-0.0631222208309491	0.0416002865526211	-0.049253904555955	0.059022265211953	-0.0416768204278637	-0.0835146597543293	-0.00627255359826914	-0.076590749334549	-0.0104634329256274	0.0573452396686454	-0.00330337657829632	-0.0228494299287651	-0.0348372098618406	0.0666364160873831	0.032003976480359	-0.0451937115786889	-0.0131681617400473	0.00871397245032571	-0.0656145441068092	-0.0614392369323678	0.0254266818232993	-0.0430492808919606	0.0097846390974705	-0.0965526402949794	-0.00518938490009306	-0.0677683000164372	-0.0265151899633695	0.00341449497519297	-0.0381726478181284	-0.0607859186531318	-0.000378768248807816	-0.0407783183804317	-0.0527905597716238	-0.0281254932241705	-0.0403487886824525	0.0284967458444135	0.0727514880787205	0.134018119098918	0.288620913788615	0.0310978758444848	0.00734613093769149	0.122075794851016	-0.0265176588030057	0.0189393512141759	0.0639636127386744
-0.0326749630830365	-0.0243917568721227	-0.0349128862267183	-0.0452405964262537	-0.0236364296781708	-0.0410447741154886	-0.0254364551026783	-0.0319634474670727	0.0116455748141325	-0.0293033769082105	-0.0439962315866718	-0.0329665850861583	-0.0238662763792958	-0.00205730783156846	-0.0104058425895036	-0.0230850569185919	-0.0525858150690874	0.0118241869367219	0.000301930788843983	-0.0474378834862285	-0.0529071133299615	0.0143629992698689	-0.0159577119282926	-0.012034459256917	-0.026943531536635	-0.0289489824856629	0.00416296674896739	-0.0375208085667353	-0.00894618000141591	-0.00623997073692633	-0.0297502780954739	0.0116011649548538	-0.0194307731237136	-0.029410483893474	-0.026990725905762	-0.04455667852802	-0.0316983908444222	-0.0522069708105559	-0.0329932976890045	-0.0317224917843776	0.0283415709087123	0.0169087143226709	-0.0101504593863774	0.195574976774423	0.0449383368152045	-0.0531603761406344	0.125668999215073	-0.00220647640824004	0.029323194176947	0.0672532469306282
0.00664176130662615	-0.016283575392981	-0.0051153413002721	-0.0177244122962459	0.0369208635823402	-0.0675746254401592	-0.0427591760533954	-0.0188359256632281	0.0130526002396743	-0.0412295112598907	-0.0737228534111427	-0.0352770532735271	-0.0279651098938298	0.0252788549551693	-0.0154967126363909	-0.0179513339603076	-0.0376332288087291	-0.0200111354178157	-0.0377479654165372	-0.0540946423195118	-0.0380569009852476	0.0438701146315637	-0.0352522394131479	-0.0404784838722425	-0.0400952030132609	-0.00474016100632885	-0.0360334955253834	-0.0356593441073015	-0.0928666995152359	0.0504644671299094	-0.0489329452592947	-0.0757335873606775	-0.00134651783237852	-0.0163132043089481	-0.0336665288845369	-0.038578986114751	-0.0394880673248608	-0.0043800521415	-0.0288715377934187	-0.0085751823209016	0.0361857176806586	0.0541101452101133	0.14975186892923	0.164080027388959	-0.0935651833470431	-0.0456139563382725	0.13593901779953	0.00957496998890241	-0.00181478020015944	0.063735325197653
-0.056366525203242	-0.0437645756643248	-0.0610580274932426	-0.0709539648221215	-0.0135819290608208	-0.0556285791891526	-0.0476907661725416	-0.0537694275091407	-0.0280654583349107	-0.0303195598847355	-0.0580699634596368	-0.0550090664623504	-0.0231517021441012	-0.0208063754082188	-0.0119712564448619	-0.0627610355498065	-0.0463685459185866	-0.0298665609016241	-0.0169605371302629	-0.0109054337317578	-0.0635144953121788	0.0106693146956503	-0.0272498186134742	-0.0453451676344689	-0.0270739687888507	-0.0188756797678251	-0.0399436732802032	0.00131258632873792	-0.0276097910851567	-0.0131365012459786	-0.0488231978843416	-0.0193537991965603	-0.0187521763972783	-0.0297620348731134	-0.0536759623077604	-0.0540529421049662	-0.0519699262238859	-0.064859963003688	-0.0554405427656094	-0.047837935738778	0.105392347743087	0.104009280114284	0.0608120220674334	0.0343111007840032	-0.0454458627623954	-0.0224505276034219	0.0572369997110779	-0.00715833809888582	0.144331896802727	0.40299933878398
0.00248708764713958	-0.0384231228652736	-0.0346989093657784	-0.0180960139710749	0.0200279566396382	-0.0511239768500598	0.0113690943268448	-0.0310835006783754	0.0289227843212519	-0.0181571296799075	-0.0641573452259145	0.00721424434578256	-0.0322612795299878	-0.0204546010821755	0.013562583771834	0.00926462231651073	-0.00623475064534167	-0.022053829775668	0.0391735407780031	0.00691078465128727	-0.0202334759638433	0.0274643933439837	-0.0101551888994777	-0.0204239760683258	-0.00768441755682915	0.0142384719959389	-0.0437670419848526	0.01143016195157	-0.0569595962717196	0.011822498514915	-0.0344119666291896	0.0228019538695015	0.0216304463787121	-0.0395570602635404	-0.0402797523790101	0.00401419866531921	-0.0244818663153591	-0.0261329707684772	-0.0339255123886518	-0.0209823191737942	0.0352482311777708	0.121294292425736	0.131207548104335	0.113629676419052	-0.0165224296513834	0.0201600643746951	0.167793328457025	-0.0249431934533076	0.0303638209583989	0.0503419266821863
-0.0276655668921652	-0.0293591369479382	-0.0207698979626246	-0.0246168612109865	0.0586506322379332	-0.0570232452809828	-0.0170768013480279	-0.0451350526152747	0.0415791743529381	-0.0357077557603646	-0.0590794720874734	-0.0472499802955976	0.00221111370762335	0.0593857653772634	-0.0305855858103907	-0.0522678532425147	-0.0478694603919489	-0.024928192019079	-0.035145504673062	-0.0591242004804619	-0.0350892029382506	0.0391331137411773	-0.00920969246779479	-0.0391887715601776	-0.0498145159915103	-0.0370982050240955	-0.0431993441411729	-0.0323644667574712	-0.0821702750267028	0.044536215118614	-0.0559743130625433	-0.0930361525732678	-0.0128754126973055	-0.0173404243474231	-0.0443639737589499	-0.035576724658209	0.00977029504514121	0.0101384854096169	-0.00596628881986941	-0.0351696311899481	0.134200067478707	0.0787417208672803	0.425563196748399	0.144082479986825	-0.0666254292739779	-0.0202640616058389	0.177877128071316	0.0356730984353265	0.0684082238017712	0.149501634483644
0.00296769211629334	-0.0342154220124523	-0.0269151729085536	-0.0222680646039569	0.00709783768888209	-0.0499305559033871	-0.0356585632373809	-0.0497775834128118	0.019685529402019	-0.0400545426579146	-0.0603794864379654	-0.00547035377061914	-0.00950182561897555	-0.01306117925604	0.0198755266816633	-0.00497011153376996	-0.00647212022295436	-0.0323676273358939	-0.0121001239488961	-0.0287270510066524	-0.0291218479279576	0.00134169698405704	-0.0344319320158325	-0.0335002990148781	-0.0450916352792646	-0.0116400266640125	-0.0332217019753988	-0.0123818787609175	-0.0759438513310177	0.0116947372403894	-0.0570763977586925	-0.0542223710659235	0.0279360278805206	-0.0477584519996592	-0.0354014816762159	-0.0355432297722061	-0.0343417341325719	-0.0120620427944904	-0.013162529873456	-0.0156944746127409	0.066238684860799	0.136842987359267	0.160752713498924	0.0732715015011598	-0.0477229492419025	0.00740834232852999	0.102540981832455	-0.0165069207816409	0.0756254402497003	0.126589995663163
-0.00886203567667431	-0.0242828110016632	-0.0133341313400344	0.0121704011302815	-0.0222351705417593	-0.0168982800314164	-0.0629620121438584	-0.0361051050441663	0.00136607262207872	-0.0648365180553292	-0.0747945329014502	-0.0344453353936169	0.0129700996111365	-0.005854826470026	-0.0498339411904537	-0.0380172297400598	-0.0331179155277578	-0.0425644450643458	-0.0420530180515455	-0.0660728715352026	-0.0465068999208945	-0.00614659856263821	-0.0359720462333422	-0.0206285894107979	-0.0130705851179899	-0.0051201804021044	-0.0174872423203372	-0.044618197478841	-0.0425152966484533	0.0486647582619809	-0.0287663132937664	-0.0455625134573339	-0.00675543545589564	-0.00250091563638432	-0.0410095956764076	-0.038922025797508	0.00637563203902216	-0.0419973766873798	-0.00207047529589377	-0.0112228181285474	0.193862881215819	0.050362646777411	0.067867836603629	-0.0161806133832174	-0.0751531562530203	-0.0464088455322696	0.109146505474733	0.000529996452584177	0.132739541272661	0.122608365020979
-0.038966099211391	-0.030969902354241	-0.0318776115670189	-0.0422174467672999	-0.0719599282336407	-0.058270052471529	-0.00592848559106745	-0.0511887098265262	-0.0323119959202359	-0.0591241897345582	-0.0675753533222471	-0.00897314485391473	-0.0786925802615254	-0.0784891865985037	-0.019186166506758	-0.00390826198155866	0.0177534067787496	-0.0624346633859121	-0.0226266890264589	-0.0317670149864117	-0.0236296234068301	-0.0611987229210951	-0.0496833443433172	-0.0764838194448307	-0.0393882133486638	-0.0302269306587834	-0.0471126336670601	-0.027165190624181	-0.0690115090571844	-0.0464892930412709	-0.0440626659634206	-0.0486530737619392	-0.0391001803962236	-0.0593864972741665	-0.0124746457893678	-0.0287777151422436	-0.039333656075838	-0.0246588014985824	-0.0376924245738011	-0.0420347608527952	-0.0353379857989877	-0.0456469688098055	-0.0536444596754519	-0.0785315222721031	-0.047766747125489	-0.0501680170456385	-0.0624589506642217	-0.0758686546319494	-0.0733524857978986	-0.0382066202349039
-0.0398836588080476	-0.0305004379343603	-0.027506317853109	-0.0382677429821194	-0.0340704800377945	-0.0263155455699372	-0.0203788911639546	-0.0422020046119106	-0.0180407091912642	-0.034942208623176	-0.0199119761391916	-0.0204174423620935	-0.0578715036617939	-0.0358819018312572	-0.0149068974067888	-0.0211801200983962	0.00214742591830218	-0.0368578104911445	-0.00779316073069624	-0.0188176521115992	-0.039587108467345	-0.0280477877269796	-0.0171302249996682	-0.0339951505722666	-0.0293054872490386	-0.0325235348804144	-0.0245212329992801	0.0093444714815338	-0.0611671999049123	-0.0332005677567265	-0.0332288624405283	-0.0600045884836654	-0.0317193634482236	-0.0280926584923841	0.0133980515514669	-0.0402167672333266	-0.048090640832688	-0.0291366162509534	-0.0201999006200607	0.0073561479136294	-0.0556047819224053	-0.0374436034925389	-0.0193543828252752	-0.0246681790080532	-0.0530103279062965	-0.0176376792196901	-0.0450016970045239	-0.0418059014688787	-0.0419705493229982	-0.0524850323562307
-0.0382746701554016	-0.0332019886131503	-0.0427272777501288	-0.0205660496650864	-0.0586810428081016	-0.0435931834219174	-0.0715333023269221	-0.0386756461759764	-0.0403487501152847	-0.0576641874154151	-0.045746364326914	-0.0363105396314908	-0.0598569072472175	-0.0656511030696568	-0.0489781766520784	-0.0379047209784022	-0.00903340976326022	-0.0438705268264312	-0.0681496540158676	-0.0285984055345953	-0.0320360966382543	-0.0373221766083053	-0.0586865411598513	-0.0258225855766022	-0.0216481356953842	-0.0424524325818835	-0.0491031198216393	-0.0438177863205478	-0.0518342556756752	-0.0354858480008022	-0.048253551209866	-0.095572383525818	-0.0462863922562198	-0.0594107407473087	-0.00338914079718474	-0.0659035923560686	-0.032546099241356	-0.0434433309461575	-0.0311356162962055	-0.0118524483515557	0.00463154673009146	-0.0277637549604499	-0.0402598602735122	-0.0240185790038234	-0.0974739391242146	-0.0584086506716538	-0.0239919147691179	-0.0652373097143783	-0.00961940409296849	-0.0159889805742592
-0.0430208803490692	-0.055216252112563	-0.0599024129895978	-0.0392422308813477	-0.0826370019913774	-0.0646001162532968	0.0450467393504054	-0.0724716371384294	-0.0470637933401718	-0.0660298885483349	-0.0787215386639625	-0.0305564972759505	-0.0892139800033552	-0.0855537864776655	-0.00569823241644192	-0.00692954446048054	-0.0151489340741329	-0.0633564020886483	-0.0264337963482226	-0.00887132007722072	-0.0168684736243221	-0.0645903091255426	-0.0703580792690654	-0.0683246178406552	-0.0613070062411397	-0.0488832419012444	-0.0607453233909909	-0.0555522695135326	-0.0710562358162346	-0.0856854722645276	-0.0796187626776227	-0.00290989782985397	-0.0673945357770899	-0.0652170646486046	-0.0454810709661025	-0.0547638682683006	-0.0353622864459617	-0.0239860655510224	-0.0203572225260678	-0.0443130615304693	0.00780741752980901	-0.0661578608251507	-0.0826434489084138	-0.0759729234015486	0.0401367036804407	-0.060852966668592	-0.0823002687216109	-0.0810195170291058	-0.0379978788306017	-0.0624429150001887
-0.0344442325062545	-0.0358413370959314	-0.0530714839553521	-0.0162784772727833	-0.0888944348950347	-0.0353216113881325	-0.0246056443450229	-0.0489202433921319	-0.0450241016899573	-0.071409290776728	-0.0388811543634931	-0.0444305252139474	-0.0478373891060745	-0.0869814221069637	0.02120284276034	-0.0337945144232848	-0.00716686840044952	-0.0588623050194535	-0.0110911336584356	0.0167337675164413	-0.0371230622371169	-0.0695045063283572	-0.0561336512170439	-0.0407982483660877	-0.0159722985461345	-0.0387815163254874	-0.0649135043119307	-0.00717495917181496	-0.0629290449235846	-0.0514037509662872	-0.0470010844421425	-0.071241268878528	-0.0633355876845037	-0.0354808619874247	-0.0193026343461043	-0.0433173803438422	-0.0395766153867242	-0.0120499800760409	-0.0176020687396503	0.0222297475785579	-0.0020564911306872	-0.0504826606849908	-0.0630205860335655	-0.055637189527843	-0.05479411420829	-0.0427921000834309	-0.0676386503759408	-0.0831379222076819	0.00430317801914433	-0.0455526713346607
-0.0160383330040881	-0.0151779298553273	-0.00972402733159732	0.00011759110034922	-0.0717693225503082	-0.0324477734387686	-0.0553129218243812	-0.0155555889420444	0.00222935634813327	-0.0526981166034082	-0.0281913633529131	-0.0424880389561972	-0.036331672382631	-0.041363579383004	-0.0105594429288323	-0.0307288618278964	0.00163509806564435	-0.0308317254336558	-0.0447036272015687	-0.0124147024344609	-0.0308237991162612	-0.0358236768992883	-0.0473170636929057	-0.0396663195388298	-0.0373416253188114	-0.0430184151189218	-0.0365726077086307	-0.030236931834307	-0.0366763620905051	-0.0447239932758844	-0.0269563322602309	-0.0547358499977693	-0.0268434779474753	-0.0615357626286732	-0.016870852806941	-0.0610099958252492	-0.0403002150459437	-0.030014753546002	-0.0136642884984322	-0.0160103314816031	0.0635171915576539	0.000990432798845121	-0.0404804547214695	-0.00567757073072224	-0.0572100315537984	-0.0542660382846152	0.0116736008125134	-0.0411011874167584	0.0431910583849068	-0.0333755496434044
-0.0402834479741281	-0.0424710380326967	-0.0363850684163358	-0.0200065158366932	-0.0857898307222168	-0.0665833121547659	-0.0389841486141411	-0.0605838852626084	-0.0354579212481642	-0.0697728518503041	-0.0498670127165499	-0.0168526691898603	-0.0739292446620886	-0.0808382122932215	-0.025383030769956	-0.00258022211530768	0.012351170750753	-0.0725233404381828	-0.024724485650953	-0.0377758647008844	-0.0310940222085366	-0.0679887135043648	-0.0525283536110124	-0.069872870134517	-9.82867944582399e-05	-0.0346875013789869	-0.0584832802734418	-0.0200811529269729	-0.0684621619166753	-0.0484655144444237	-0.0542899110271589	-0.0816145418612087	-0.0438381748302013	-0.0365848282756029	-0.016489570075154	-0.0325997753449567	-0.00917466517757272	-0.032821558298552	-0.0266675199706961	-0.048649961168069	0.00248822886712589	-0.0366937424247057	-0.0419026477416225	-0.0567569717882268	-0.0643595979403225	-0.0475429091585282	-0.0480388000718242	-0.0776219434957061	-0.042007178459898	-0.0381734115828377
-0.0532803751906665	-0.0455243431012651	-0.0557582694885438	-0.0131837316958129	-0.104062320344537	-0.072840196299456	-0.0507457188687689	-0.0472526612738772	-0.0476303241317136	-0.0945274869323421	-0.0904163667077141	-0.0609999255147175	-0.062412498213896	-0.083554524485086	-0.031984593486361	-0.0327011859484133	-0.0338516735233544	-0.0808458254931871	-0.0608671376116694	-0.0454886128867802	-0.0611815837950215	-0.0693705065107235	-0.0879854968669371	-0.0573589028164475	-0.0402768576232554	-0.0567319297174642	-0.0860487993692246	-0.0498457581555648	-0.0372552351168101	-0.0625756239373868	-0.0423360793449504	-0.0141224812605658	-0.036226359102587	-0.102605760839323	-0.0189152122333192	-0.0795928052691576	-0.0174568552494178	-0.0434562077014664	-0.0202047341154058	-0.0376735725617966	0.0651800330196913	0.00942283106659501	-0.0135422709953357	-0.0569844294388487	-0.0222081455886352	-0.081860867554436	-0.0625943124667267	-0.084476509530973	0.0513609523611618	0.0431644658295865
-0.0356070093061584	-0.0403553405591739	-0.0396417724864478	-0.0558068249891625	-0.0600662930729074	-0.0600914096532452	-0.0409678368841167	-0.047118814237614	-0.0247956260997782	-0.0576452827018731	-0.057991720497917	-0.0313252843379086	-0.0727612705680522	-0.050233125166315	-0.0148247921847597	-0.0223427765467129	-0.0193049170411689	-0.0554256468028576	-0.0415134874579507	-0.0228640792725564	-0.0467301052596126	-0.0450412533804971	-0.0408260038979048	-0.0580022888447541	-0.0584269350594738	-0.0163701853748921	-0.0456584765243475	-0.0260626665779735	-0.0723900053432397	-0.031612330410528	-0.037883655732841	-0.0587515280651771	-0.0355854133505513	-0.0657437455403193	-0.0068456329880339	-0.0582970429692951	-0.0586236605597752	-0.0384757250277569	-0.0312771765116881	-0.011554339621582	-0.0509356972977249	-0.0235182125972655	-0.0245022711375973	-0.0130962538877456	-0.0523637694915791	-0.0645985425974914	-0.048917765738166	-0.0495221140374865	-0.0192829601640293	-0.0297839962386943
-0.0294223027122409	-0.0256402263261176	-0.0345102752424609	-0.0273323172696003	-0.0229356138275273	-0.0270341600267576	-0.03550721147326	-0.0255003541423896	0.0243085094711815	-0.0434976246086442	-0.0489040705517529	-0.0288319761453386	-0.0278540303193592	-0.0346350315037472	-0.0404435636066323	-0.0406713315508163	-0.0357465586475495	-0.0134757398344325	-0.0415855261479888	-0.0217128374936046	-0.0433106943803701	-0.0113640431003274	-0.0258139863466397	-0.0334454287335648	-0.0394261065539064	-0.0257446223519105	-0.0476255794315125	-0.0170043233227186	-0.064736261215261	0.00220538390275159	-0.0427063827901257	-0.0747395363564966	0.00247221935875503	-0.0236789135303108	0.00663167194801427	-0.0430510284533027	-0.0178401200699885	-0.0386557759068236	0.0104300524184901	-0.0250760610630692	0.0407785804036827	0.162693729675245	0.0796074261515074	0.452028578495431	-0.0541344739875594	0.0182633286939977	0.0930021731708993	-0.0431007727360106	0.0241727545163078	0.0503915077154348
-0.0263996232574694	-0.0121570811550096	-0.0381214522259007	-0.031449891626968	-0.0228550353767692	-0.0818400242790414	-0.0459204187507401	-0.00758214801753616	0.00850269768188468	-0.0360825942310832	-0.0681830467246847	-0.024977820295169	-0.0428705323046562	-0.0281041885982091	0.00699361656706049	-0.0116458650812333	-0.0215002237104595	-0.0259679611906246	-0.00386261837335182	-0.000952110714546826	-0.0240613045524853	-0.0295589743543742	-0.0457738200394118	-0.0870207180961526	-0.0466707231217851	-0.011802375575957	-0.0512402806464955	0.00864797992266695	-0.0658524305071664	0.00402737425748	-0.0444224391648977	-0.036878690820132	0.0430806606210098	-0.0821387325793139	-0.0503380552437079	-0.053808897044145	-0.0429282751647326	-0.0329011668901015	-0.0142764115044884	-0.0208225837236014	0.131133810631748	0.279734952445348	0.228523023696354	0.185520219239267	-0.0260954459203867	-0.0166385959069336	0.151346670513029	-0.0595861686665755	0.209050263014855	0.144115360727141
-0.0243719880206066	-0.0529464643783418	-0.0434663987663038	-0.000370751643027449	-0.00227822069760961	-0.0539548851604101	-0.0394871797190507	-0.068597445261834	0.00171596903000554	-0.0358695953044494	-0.0772888368888076	-0.0376773483632048	-0.039240908203154	-0.0437846274919301	-0.00946895723079065	-0.0354226096178721	-0.0334235018218874	-0.0315679953732081	0.0029348009843361	-0.022813036414764	-0.0543288055813518	-0.0228735597532155	-0.0440808123270978	-0.0710057515702147	-0.0208766936282839	-0.00415985292474756	-0.0744260619565436	-0.0112421002685407	-0.112614618618307	0.015279550047114	-0.0482618324050411	-0.0947965173279876	-0.0164774745023796	-0.00272209733545749	-0.0656627164855329	-0.00815949833574793	-0.00515621964527671	-0.0448683501709608	-0.023304947237471	-0.0470696891378214	0.0866618248912935	0.102919776075987	0.102906613194819	0.140393960964392	-0.0637722987912122	-0.0189108081365972	0.104637351617163	-0.0471675628476696	-0.0132772310456599	0.0588652139624366
-0.0585396077998846	-0.0593269402917382	-0.0533962500495956	-0.0579103934811701	-9.8810533311767e-05	-0.027057377554114	-0.0682357209556166	-0.0658797059823703	-0.018374289794513	-0.0161605902559277	-0.041864936615169	-0.035507795422883	-0.0600519162274497	0.0154728225714522	-0.0661452844460452	-0.0506534464605773	-0.0385840804612144	-0.000839240280922999	-0.0537381912475229	-0.0397419506596013	-0.0590658478611031	0.039670983750553	-0.000657531941991733	-0.0675925328348155	-0.0508642488067409	-0.0258279805268038	0.0120250720023311	-0.0376076722538091	-0.102484229480149	-0.0218984440648784	-0.0660221691345244	-0.0852346514748444	-0.0261363489091654	-0.0430883183009764	-0.0368742112356367	-0.0800625497378731	-0.0475971003298216	-0.0669371960603156	-0.0719135837457725	-0.0460458144127072	0.00162522477239702	0.0880781117133263	0.0928686268789197	0.195997152484009	-0.11090388936233	0.00277350712658269	0.171764146996185	0.00732630541017931	0.14311165487301	0.302408695031646
-0.00544545809867754	-0.0300609181104894	-0.0227698655839237	-0.016300943420442	0.0352458955168317	-0.0651152267234675	-0.0483228089154918	-0.0412848121574178	0.0366705826447732	-0.0220565010755947	-0.0793300884763689	-0.00898154146615802	-0.0177584637298815	0.0170445677269374	0.0257337938309407	-0.0151904162787554	-0.0289618947986632	-0.0267605906392295	0.017784959738529	0.000238527868293335	-0.0281633822192905	-0.00228552809722014	-0.0345483984337443	-0.0476004510973586	-0.0386461515465616	0.0123363831098478	-0.0312112592406885	-0.000140066193748049	-0.0881351351670249	0.0197712758182511	-0.0714010772583478	-0.0650006848683614	0.000200353599704348	-0.0340857139056387	-0.036779449935746	-0.0399824112096742	-0.0167168637932173	-0.0344832278461437	-0.0231000753849156	-0.031552388674282	0.0375122805524386	0.135450065477712	0.501805651285289	0.142073589102199	-0.0753368918766741	0.00436059586065895	0.158395330890081	-0.0194577823758784	0.0141639644842459	0.0836482458303983
-0.0434161959955852	-0.0396535172654922	-0.0378362470488063	-0.00154097255019211	0.00273453048185251	-0.038968232982134	-0.0295714267529843	-0.0523619595024054	0.00889739580445806	-0.0196933057328174	-0.0565579446840113	-0.0307567912399947	-0.0504523316715434	-0.0207207839468947	-0.00423853418343069	-0.0119261699045782	-0.0270635413648344	-0.0180040075058882	-0.00654119777871795	0.00205828847842685	-0.0348541452192541	-0.0116398158570961	-0.00786026934023166	-0.0459199884914079	-0.0231931689227531	-4.30283815306096e-05	-0.0235706404972235	-0.00476265268358644	-0.0764738652482889	-0.00596615672376751	-0.0526311575183274	-0.0537913351765428	0.0116691603810674	-0.033668822043752	-0.0460965126519575	-0.0256912241931565	-0.0162018866636497	-0.0490126078295684	0.00189814797851543	-0.0479551140798592	0.0290338714487287	0.116118968240549	0.0720922688224912	0.145773138688618	-0.028011626286052	-0.010605042902209	0.12083456885817	-0.031744593064145	-0.000853436990168194	0.0727867295243665
-0.0464551765667738	-0.0439979000825333	-0.0401570583350718	-0.0437496049346368	0.0130577071133816	-0.0503014516369489	-0.0658843230703229	-0.0407971521971482	0.0241846289084638	-0.0181359679023163	-0.0636177845695316	-0.0425107288943329	-0.0129596109907514	-0.00143225987571684	-0.0506641099725175	-0.0556571858303147	-0.0383273618722747	-0.00650692229566499	0.00611660426276264	-0.0398135002777517	-0.0606827331201807	0.0247144778889147	-0.0265776400654994	-0.031851115737486	-0.00863574454943422	-0.0125439895594222	-0.00772259094338329	-0.00531894072812604	-0.00499129863082574	0.00685608670780801	-0.0462407997983632	-0.0432687195735604	-0.0215402514733508	-0.0295873243234939	-0.0267849455598836	-0.0461262497317847	-0.02314294151821	-0.049186655585871	-0.0558887040285644	-0.0393072678759771	0.1093754582109	0.0803999011010569	0.0802391608425441	0.0387902758929976	-0.0473355901848882	-0.0213071341050523	0.114002362195471	0.00161393781499538	0.196111312367882	0.452691999862303
0.0210717057654435	0.0127061186738349	0.0291279559910423	0.0109783967850319	0.00947958209508749	-0.0515291200871118	-0.0620711530194571	0.0186177508661004	0.0236312505537531	-0.049992820864612	-0.0660324410016329	-0.0145920367029952	-0.0325212941651672	0.0102310904230178	-0.0036297491348492	-0.00455352072481927	-0.00720271435190733	-0.0119231070200867	-0.0162601833558421	-0.0353522167699976	-0.0142551885616987	0.0399191396248123	-0.00306916986040552	-0.0410629373086143	-0.0395683043070981	0.00477834028000016	-0.0275821948881328	-0.0247513632693491	-0.0755566174361573	0.0520687283011211	-0.00791565541302708	-0.0816626702920302	0.00570121237466019	-0.0387522211254404	-0.0278586758679099	-0.0152308511506275	-0.0141792490575981	0.00677448970946169	-0.00725942584197666	-0.00694039911846144	0.0203968679176677	0.0296848881189856	0.140804836686934	0.0781039296446815	-0.0785477827238977	-0.0425108398734863	0.0905976237361724	-0.00820078828673313	-0.00879899211866288	0.0315556528580718
0.0505253515392195	-0.00557229680707254	0.00587645468118786	0.0167328180448328	-0.0214893704299738	-0.0436746248040324	-0.0566504878879351	-0.00495221570337509	-0.00903473969750717	-0.033782801557963	-0.0608263669592337	0.0332266477396201	-0.0385503504303163	8.02392677976675e-05	-0.0136027125629702	0.0398533655895401	-0.0105697915122132	-0.0200107904465105	0.00863404288505485	-0.0242270462533384	0.025416634686632	-0.0124593636912273	-0.0322215426335949	-0.0248555300625351	-0.011563206462104	-0.0105422085363085	-6.03096829230832e-05	-0.037585927098079	-0.0625700053470727	0.0109189442762099	0.0199403908727183	-0.0557992346126774	-0.0184434241492311	-0.02526589839656	-0.0235443141294854	0.000730556407682349	0.000707878822376595	-0.0184685609755771	-0.0148431809816878	0.00943826931161273	0.0905657235248332	0.0267230506646332	0.13148921864201	0.0444867608500481	-0.0653339849186571	-0.0532743604468979	0.0936426188353135	-0.00340009040539791	0.147749452490872	0.132171598088927
-0.0423065557530646	-0.0270316395876137	-0.0334199878999656	0.00197586619232819	0.00671065213235921	-0.0463035208542226	-0.0306399019474885	-0.0365286502006896	0.0174596253653456	-0.043042736642729	-0.0640198309146369	-0.0213455947597554	-0.0357588782467507	-0.0185966395262527	0.00198569922746197	-0.0290988037875705	-0.0501536847693745	-0.0251449125903589	0.0160096533893326	0.0038038585193098	-0.0501391148024844	-0.0101823632412721	0.00228521200183803	-0.0636184691614499	-0.0373524715197511	0.0169823915963321	-0.0319935843178767	0.00611069197999582	-0.0500433696450504	-0.0287303264866962	-0.0498098214431069	-0.050125621629078	0.00455678163253297	-0.0702389238691041	-0.0228131240323644	-0.0340015284008724	-0.0198399005698003	-0.0601305474691242	0.001438699186492	-0.0439146137345111	0.0508047267426	0.0627217250795791	0.090375805629459	0.176668901866767	-0.0343195822314155	0.00060480340741182	0.137404499478583	-0.0186332867857126	0.0336783256879143	0.0530867286064805
-0.0536781082626969	-0.0331143761259158	-0.0394938934362677	-0.0223043603699524	-0.000302705517265019	-0.0544158254984574	-0.0454871018293399	-0.0313270126012014	0.0140872357781594	-0.0193825045188381	-0.0637351604219943	-0.0115015594776067	-0.0575434383281833	-0.0208798146853784	0.0112556624027079	-0.0260482068199106	-0.0341968845986391	-0.00487475640963952	0.00815090644756294	0.0124682673888807	-0.0376205794257692	-0.00618887143491944	-0.000168786409388003	-0.0481649759842374	-0.0281489393735114	0.00880734725150976	-0.00244973475133272	0.013106241356336	-0.0564188971306089	-0.0383924043594002	-0.0526461612891409	-0.0362902547244772	0.00889334126657863	-0.0702525323776419	-0.03159933133006	-0.0309821406477439	-0.0253100193561693	-0.0511418229125154	-0.0247793853228164	-0.0308814256120672	0.0160997672884431	0.0409180196390794	0.0541084645508946	0.211149789806542	-0.0333120777078015	-0.00268252796371677	0.0969463903710053	-0.0309020741310751	-0.00593908649975332	0.0555465249939357
-0.0267616903982837	-0.0304278762696073	-0.0474294386221967	-0.0591965423319095	-0.0217634417531841	-0.0639757597784099	-0.0720568263501057	-0.0311732495717519	-0.0273783832912221	-0.0507375535953865	-0.0506740466442778	-0.0298869226008778	-0.00815498528009951	-0.0237243263753033	-0.0576626924538232	-0.0401426330283486	-0.0325563258582913	-0.0478839877397228	-0.00108991706372287	-0.0632924627580203	-0.0536206436254891	-0.0168680099562587	-0.0736361613132271	-0.0597477565086884	-0.0454624687525961	-0.0399176443135726	-0.0613096651059622	-0.0189187372982122	-0.0458982484883913	0.00521953648283514	-0.0236806284139429	-0.0290679355859205	-0.0328052261388715	-0.040387066943809	-0.0282887156965931	-0.0640473288720821	-0.048453303849075	-0.054712655447888	-0.0464950070109887	-0.013186536636126	0.125535537480705	0.139458438692735	0.114857727530458	0.0224515976968975	-0.0224963911775771	-0.0537577811352741	0.101578567818274	-0.0204639871447507	0.288769699639396	0.433762480286182
-0.0347717039295862	-0.0547926334612923	-0.0529176744928148	-0.0228926697206459	-0.0992253258515001	-0.0571023559651044	-0.0727781988960323	-0.0371277095373281	-0.0356438846702365	-0.076227151581502	-0.0645633707493476	-0.0567941895263077	-0.0575934278837482	-0.0579732752444269	-0.0231555625028594	-0.0510849129903336	-0.0351773106056518	-0.0564306081904385	-0.0631770674761546	-0.013903464755073	-0.0486231368211955	-0.0654826958530437	-0.065169567539701	-0.0709948606734306	-0.0426969915054895	-0.0591888433984496	-0.0597676044976008	-0.0355653227378196	-0.0779639948926606	-0.0745485589350932	-0.046538858326868	-0.0905920940726067	-0.0512169093241194	-0.0729810201880177	-0.0288681703245853	-0.0752038229976131	0.0139261751034139	-0.0245899026641183	0.00797316798165826	-0.0130646203144098	0.0421500371361099	-0.0188174746099742	-0.0227389575705438	-0.0372841143689078	-0.0785227961553929	-0.076755481835496	-0.0409846283274006	-0.0627355840380441	0.014770802472921	0.0120797325122285
-0.047568512244188	-0.0267944106654968	-0.0344051014924454	-0.0238849383272519	-0.0619075148458559	-0.0586257477967214	-0.0900350071223195	-0.0314404996732474	-0.0349774872382863	-0.0631471519942014	-0.0643000464774909	-0.0507192075060344	-0.0684148918554225	-0.0594849420216733	-0.0577492680805592	-0.0437328049138585	-0.0120606001064655	-0.0450354854231949	-0.0567724378704296	-0.0522994603880223	-0.051150699361025	-0.0289460214785779	-0.0669496686850133	-0.0461815820962152	-0.0383201805055114	-0.0470932189306938	-0.0468941310463485	-0.0534962688908532	-0.0679047264455329	-0.0282442633877446	-0.0416429945498562	-0.0973022235941697	-0.0554320830420706	-0.0689159438942664	-0.0105160375413486	-0.0605808887102124	-0.0304633592558615	-0.0468981277413859	-0.029326412784358	-0.0189397484500059	0.0325394685974514	-0.019625681515586	-0.0362814049988991	-0.0359681223083636	-0.096954868615021	-0.0716589212976048	-0.0276795989345041	-0.0685248878594879	-0.00886524075652774	-0.00053744993193581
-0.0543229275763808	-0.0201256388244736	-0.0497986477611466	-0.0222938262391518	-0.0914102246590681	-0.0347211537942622	-0.0201739939495799	-0.0298445022792159	-0.0601162341790027	-0.0254267143476205	-0.0334055456150628	-0.0662034871361989	-0.0702079051932868	-0.0617074762680823	0.0311194601181406	-0.0465303067481043	-0.0365283231884937	-0.0383201579277348	-0.0343907287432081	0.0365423326668021	-0.047701117708607	-0.0702265050224975	-0.0367705127794537	-0.0741617583323331	-0.0474514831164428	-0.0536307141169006	-0.0397441916750406	-0.00265902404922886	-0.0758603424120094	-0.0872379034883528	-0.0328786619527891	-0.0637242870707086	-0.06538712273055	-0.0628936038233978	0.00230060858978688	-0.057565587851429	-0.0196717077629103	-0.0325790006548758	-0.0136492975977987	0.00267092187500711	0.0202978634374838	-0.0505327484044761	-0.079559239118926	-0.068134946353768	-0.0422423653130126	-0.0447294783331582	-0.0596664174759923	-0.0606155104106025	0.0353078342377709	-0.0389173604754839
-0.0409490075366899	-0.0346736853938239	-0.0481748598587818	-0.0334454821038659	-0.0894400204884108	-0.0247640106464478	-0.0699231519567539	-0.0368837951890992	-0.0597797775825484	-0.0462445881221282	-0.0199914366526282	-0.0585059662824832	-0.0482320501319939	-0.0470808802795309	-0.0510353182893183	-0.0390101639621882	-0.0318813288505415	-0.0419814901791724	-0.0605974559000124	-0.033610111031786	-0.0377239505314043	-0.0539849246831155	-0.0530658954427003	-0.0606215902272169	-0.0227895561913209	-0.0255113733988626	-0.0207543214920843	-0.0324114014392379	-0.0446877523837465	-0.0440595661494579	-0.0327850753049082	-0.0633951509786341	-0.0316731668833818	-0.0279800935563709	-0.0165378388913266	-0.0605563691150842	-0.0125788329007455	-0.0404311629859894	-0.0166989758719538	-0.00895617624325535	0.0119909164083697	-0.0167977785636491	-0.078366846848284	-0.0556703137982025	-0.0613075840736524	-0.0737901119758443	-0.0543595723074204	-0.0297523742987078	-0.0182861865366997	-0.00860972534413237
-0.0573542588376588	-0.035602187121953	-0.0389307548392204	-0.0515057974830111	-0.0592287345809558	-0.0469168220977283	-0.0320193658588331	-0.0447129242543791	-0.0316184652969847	-0.0520166494365757	-0.0436549017552219	-0.0316344634354749	-0.0845886063280867	-0.0657347734932689	-0.0179431123502631	-0.0271631659126189	-0.0165815565518382	-0.0461401359597237	-0.0524373821258226	-0.0151664617151955	-0.0493509933408946	-0.0362919811401861	-0.0379652880879776	-0.0401890140857099	-0.0482979331757887	-0.0439982364786724	-0.0370806970309454	-0.0318886757954889	-0.0636628671472963	-0.048869808958205	-0.0561341825211552	-0.0663009352051667	-0.0474595677502132	-0.0790646283796263	0.012716916164642	-0.0668611710784384	-0.059676252029698	-0.0492773643731815	-0.0390859565443799	-0.025195682486987	-0.0617750086334798	-0.0383075780569082	-0.0440666503927124	-0.0039759513472067	-0.0689595184518204	-0.0480794694766666	-0.0377642089298498	-0.068994068625314	-0.0334544790136342	-0.0541618622703627
-0.039662421213346	-0.019809871780614	-0.0463199928833593	-0.0131839908451049	-0.0918656659901219	-0.0539140404797439	-0.0475754622516452	-0.0281551465311349	-0.0555502511695983	-0.043357607961492	-0.0570299137468448	-0.0607595019386829	-0.0493898739227713	-0.0733580690145902	0.0116501823436925	-0.0483990715349969	-0.0424982517032804	-0.0628843336432688	-0.0349739595883573	0.00987674267471667	-0.0494099591348124	-0.0691988989654946	-0.0625776984702728	-0.059438612302304	-0.0373166403051903	-0.0477298650837913	-0.063740953266505	-0.0281896501157463	-0.0586441483301666	-0.0782056771196955	-0.021790805640697	-0.0644901184070043	-0.072958697210358	-0.0856357422680802	-0.0320148802403828	-0.0703804826902741	-0.0309066144960477	-0.0158266606218508	-0.00820010991898953	0.00418781169810143	0.0267010796614084	-0.057943627702876	-0.0737331686574954	-0.0329342322718929	-0.0566006040115877	-0.0862363645105444	-0.0551681698904	-0.0636268160149432	0.0274602976452384	-0.0396610872302626
-0.0294224404217505	-0.0516947468252509	-0.0654630850450509	-0.046021721908079	-0.0894691912998264	-0.0741880710990945	-0.00342957368955586	-0.0538713815777657	-0.0450368247578405	-0.0493569716064184	-0.042657928404665	-0.02089833170068	-0.0800096522358246	-0.0633170226107628	-0.0233742080660199	0.000514134729820766	-0.0244644577375763	-0.0521769523848337	-0.0298763631760795	-0.00903491756296548	-0.0111124104836209	-0.0717560373794451	-0.0667654683182852	-0.0728571165355144	-0.0227612453550408	-0.0538849671675784	-0.0369230549347827	-0.0449124400918285	-0.0603005707842433	-0.0795356005413476	-0.0464067303056809	0.0113826461688269	-0.0497640073808332	-0.0318014280679993	-0.0291843808223829	-0.0513845705878966	-0.0234035907869681	-0.0319168568876483	-0.00939476300951106	-0.0529286820110709	0.0453121448538638	-0.0584827717354244	-0.0785139266031607	-0.055959874449346	0.0351913374391309	-0.0309899574746328	-0.0607115181614203	-0.0642975041972835	-0.00998222441495989	-0.0561642345024507
0.0176077938630629	-0.0151356768573746	-0.0113019751373716	-0.0264593725168681	-0.0628129981266061	-0.04087220420609	-0.0406742457446061	-0.0115471855828611	-0.0301189649499126	-0.0276891367537175	0.0113326962319798	-0.0465968173085237	0.00694818971830867	-0.014137260857709	-0.0152826391190375	-0.00736653748174317	0.0111217766940921	-0.0240647510668558	-0.0104853148779372	-0.00707041445604715	-0.0140356172489483	-0.0523936955914646	-0.0551935332929249	-0.0539239109981386	-0.0478937769778138	-0.0694366901408751	-0.0568095384487539	-0.025092102803701	0.021149252682281	-0.0609341809267184	-0.00201655545571664	0.0455694919844883	-0.0213619314864833	-0.0611002832944705	-0.00400136105678092	-0.0612846296301512	-0.0299496953972943	-0.0205533578510456	-0.000260144622484096	0.014149457887381	-0.0119333994169487	-0.0307150236614517	-0.0574129660118526	-0.0588868908310866	0.0427056370974124	-0.092612639407124	-0.0725095471940875	-0.00538569142809477	0.0384387648414737	-0.0204479497062061
-0.00495582935217576	-0.0321768330241669	-0.0121913301049716	0.00495411673795849	-0.0836669301111505	-0.0471791568329373	0.0330043721841469	-0.0294283393496135	-0.00619325390072733	-0.0333225482661701	0.0139905356748692	-0.0119446343459288	-0.0148288429767509	-0.0426631454897543	-0.0085360904528139	-0.0178954480103827	0.0278297078935607	-0.033614587310415	0.0588044323845287	-0.0117328232296652	-0.0364978749255805	-0.0728208604868904	-0.0834361002318135	-0.0717378613069981	-0.0380793096968951	-0.081082432660936	-0.0844712601024465	0.00283384353734081	-0.00939536603280595	-0.0861375903980634	-0.0248197507551355	0.108679102542461	-0.051514534354299	-0.0528540700324784	-0.0191206046894231	-0.048582159396931	0.0234320112693095	-0.0474330076955619	0.00348953635220472	-0.00639615982824758	0.0101740005513569	-0.057746423807554	-0.092547674805229	-0.103875514817825	0.167561509280687	-0.0440877680104128	-0.0810885832879469	-0.0379485689256224	0.0719976686164948	-0.0271568503773684
-0.0402903276582202	-0.0598500130227426	-0.0602996708629151	-0.0397556406109711	-0.104027583576353	-0.0577708749213039	-0.0670850658885048	-0.0657943628021359	-0.0566016115921272	-0.0661421094816476	-0.0729461969797045	-0.034261392860961	-0.0890477553942428	-0.0822684532287329	-0.0650498128285848	-0.0108041474441109	-0.00841885831484401	-0.054150754845548	-0.0671285476038091	-0.0192778630359496	-0.0065195480097231	-0.065645014600342	-0.0854379332386344	-0.0754519878029457	-0.0513963265306189	-0.0487751357550347	-0.0404957519290329	-0.0737910549523884	-0.0826668735240526	-0.0634627742891599	-0.0625875756997226	-0.0687309442436961	-0.044120300997518	-0.0675741897456711	-0.0234339681485154	-0.0725106444083947	-0.0388981931856066	-0.0284570631768859	-0.0208025043712349	-0.0484297407350485	0.0137616278985039	-0.0464352150803977	-0.0650799962047588	-0.0674993188241524	-0.0674655548757638	-0.104210497752082	-0.0717938268848198	-0.0717268546042133	-0.0437484910016717	-0.0563798659195113
-0.0380046362829274	-0.0327280376223659	-0.0359039168161588	-0.0428334542332627	-0.0218080260953875	-0.050492483712758	-0.064604921486763	-0.0430423648204488	-0.0201919066014023	-0.0447179763092208	-0.0484708944312391	-0.0316351959485348	0.00251501650623858	-0.0235735482909046	-0.0514147475195404	-0.0463464295904027	-0.0368327851299445	-0.040587881937013	0.00957590249301339	-0.0657466858509406	-0.0594199331543047	-0.00450776660297121	-0.0497109411761702	-0.0242738118861338	6.5140141723341e-05	-0.0293125777319	-0.0432495117410995	-0.0340652555218673	0.0020732939396509	0.00276898033699828	-0.029387707070436	-0.0426478593875656	-0.018390403806532	-0.0281428065068197	-0.044055102340092	-0.0513704691582173	-0.0377056898707898	-0.0484386248480818	-0.0438223508965471	-0.0182074967773018	0.0906193538995022	0.0320867117729615	0.0359944247648788	-0.0330598525139668	-0.036572284003437	-0.0598474457546393	0.0573490576783566	-0.0212263073683399	0.215212148178392	0.304075413786499
0.0163539374462896	-0.0497572185774049	-0.0415132163046429	-0.0220088250030492	-0.059261210245165	-0.0496663390149887	-0.0438438134707027	-0.0512712403885515	0.0258271224312039	-0.0557668504723699	-0.0632156884930969	0.0214645635172386	-0.048426228568256	-0.0792872028092756	0.0276356615954057	0.00523588648191277	-0.0102460122113705	-0.0537188670172702	0.0308454098454433	0.00824842866368436	-0.0159213599104718	-0.051044099271471	-0.0521281160082207	-0.0136485948640841	0.0030310083857587	-0.00770850560612627	-0.0573599733401503	-0.0238466836883116	-0.0457413663393632	-0.0346311835298028	-0.0343624015358932	-0.069961484085193	-0.00949396960945569	-0.0455867433142919	0.00930991717090426	-0.0112697636756104	-0.00322426462813255	-0.0624354278063612	-0.0336767069800638	-0.0352567526023699	0.0975688383930827	0.0900976832915512	0.0693522311378265	0.1438457673003	-0.0832340213721363	-0.0232525058519476	0.0999582845936881	-0.062793084466418	0.112094297844632	0.0759356996449991
-0.0214324326451859	-0.0366521806977647	-0.0355147607106568	-0.0550617038691836	0.10324715142835	0.203194927841547	0.187489590946009	-0.038824754899686	-0.0413829216131233	0.0917192958051712	0.0712695400789897	-0.0309006962183026	0.269657355441662	0.0854062604311988	-0.0270432149167809	-0.050424852893997	-0.0762697531453315	0.073037226688031	0.00249009259500787	-0.0342015750563443	-0.0211842474762372	0.0475816629310209	0.0752795149027089	0.464554916608687	0.29580745748485	-0.0819187563335929	0.123028243163086	-0.00358829799540354	0.555725844472114	-0.0846463597148231	-0.0196858748209739	0.278196402799979	-0.0436694909236306	0.203645745956903	-0.0468559289425868	-0.0113392483431175	-0.0363824095547114	-0.0353298706389616	-0.0150629172058126	-0.0250763172005129	-0.0241267096380018	-0.0664992573392576	-0.109357447706986	-0.093295513077849	0.238099074651345	0.0712480102649299	-0.0930670060536696	0.140319086148386	-0.0476991914149599	-0.0932926751545422
-0.0385298650376062	-0.0586919855932375	-0.0461610193467989	-0.0509544872136378	-0.0138887680029302	-0.0428175295094971	0.0196155350613555	-0.0540918149651211	0.0502904307784642	-0.0410775109515868	-0.0738168671318206	-0.0034866322368166	-0.0409104206899553	-0.0469917605260344	0.0496585388118651	-0.0186794574420675	-0.0413154279985789	-0.0429097178720548	0.0746239357203388	0.0194157338306109	-0.0538987971715508	-0.0259948098818429	-0.0307210691068763	-0.0597492836741049	-0.0459799337074082	0.0150970989965886	-0.0586649747433082	0.0437593818665628	-0.0921332925770405	0.0290976929301906	-0.0725089306468719	-0.0268039806346659	-0.00170062900001387	-0.0191562567710687	-0.0542535273594228	0.00236912609251279	-0.0139311357066645	-0.0379489670092546	-0.0314073050899555	-0.0342928587550492	0.0353709631854516	0.19352694443795	0.152637160198552	0.32319524726099	0.0200181293081319	0.0141757479611926	0.13927409330095	-0.0500652331097466	0.0615141882925522	0.0522076411433138
-0.0299844917986069	-0.0390910822340307	-0.0363245313420987	-0.0350052039332667	0.0442683643322147	-0.0294111974320743	0.0878579969452987	-0.0581471720681178	0.0173251481668617	-0.0113815211628969	-0.0455450277892681	-0.00595627396148378	-0.00680612292874809	-0.00943819459155984	0.0657586084535415	-0.00462527561996296	-0.0369267731386898	-0.019583847199647	0.0973813740166285	0.0207633311756419	-0.0415202384596651	0.00379558315150626	-0.0057656683892782	-0.0492217265722289	-0.0470103012406787	0.00945056024985802	-0.0547432633508987	0.0435927246260325	-0.0839360146410253	0.029416872424108	-0.0529591749798597	-0.00357777658945446	-0.0383761285404227	0.0071096433278086	-0.0779003182000505	0.00748631528910602	-0.0279189880377469	-0.035830351166526	-0.0140380826486071	-0.0257649861816489	-0.00494436296839844	0.101004771703909	0.0875864458572134	0.212714299381293	0.0951636817795377	0.0270193588042321	0.0832193146000384	-0.0213903500162104	-0.00303185202244639	0.0161061294448384
-0.0448040981944285	-0.0433025972222372	-0.0295963553652818	-0.0375845672911825	-0.0171845395259958	-0.0314127688437491	-0.0273056857417036	-0.0449598014750141	0.0443278011481449	-0.0438724658240391	-0.0604938908035766	-0.0255991161711702	-0.0184758871105861	-0.031105945923482	-0.0571644357171254	-0.0484084437943928	-0.041683022255718	-0.0308909148823593	-0.0477736051121913	-0.0499065756269564	-0.0418898738534552	0.0096001472244233	-0.011870727295823	-0.0330489861342605	-0.00938696379629945	-0.012152742899197	-0.0365264622475162	-0.00214036218014064	-0.0611628165977464	-0.000225993655080694	-0.0449625527181368	-0.0713942207980643	-0.00166324993183306	-0.023528824965146	0.00275008650458521	-0.0616975015989053	-0.0198137228944639	-0.0245938575534663	0.019984797336544	-0.022265711169047	0.0190466736008866	0.461053861625697	0.129122261419618	0.152372145081716	-0.0562694959506226	0.0312272073316957	0.210715957699778	-0.00217539118696346	0.0990497060102565	0.119015415417091
-0.0359450702985489	-0.00110322284351599	-0.0309965020991729	-0.0642658700847684	0.330925474293364	0.0734475279257149	0.0714265554683543	-0.0306765375435763	-0.0633553887469031	0.41310781763105	0.261472895239623	-0.0502377400662315	0.0938942221180864	0.48677128244902	-0.0888099934386277	-0.0804566969975004	-0.0466056652979637	0.365426817712684	-0.026678146544707	-0.0689492986096423	-0.0496690469587239	0.402238264006171	0.368090883018726	0.0425223383852823	-0.0106856702609497	-0.0878661134211587	0.362236358097326	-0.0438018281341394	0.0866889146813217	0.000685702019808901	-0.0111425797605983	0.161367246172305	-0.0462506417090045	0.0492429675588319	-0.0393425531013589	-0.0462209436283394	-0.0610713036389091	-0.0132602507866506	-0.0508877074363804	-0.0440102271074434	-0.0646010797420664	-0.00111578578208298	-0.000530070881689567	-0.0498028379879243	0.153957640136491	0.190321091317674	0.0189159110688181	0.401357284482088	-0.0246766669467234	0.0129623809801033
-0.00925586482524334	-0.0302937216249822	-0.0267954478053741	-0.0275028642618687	-0.000140768508474782	-0.0399742991770261	-0.0252645741269948	-0.0479603102993661	0.01859153549847	-0.037754969455194	-0.0489600248942515	0.00487946243262867	-0.0412927735087292	-0.0320856353459484	-0.0232399290612884	-0.00115712028567815	-0.0109240803132656	-0.021125922962822	-0.0315422617032965	-0.030642951593114	-0.037793141126021	0.0305761559460414	0.0146276223086572	-0.049968823562574	-0.0461065807236595	-0.0202219970790211	-0.0352196986457283	-0.0300173477575926	-0.0825073132094858	0.0124429288504145	-0.0426030853041112	-0.0576304546046971	-0.000121242930953651	-0.0518837932069054	-0.0173483058090722	-0.0591859550574797	-0.0273056377823895	-0.00920979910756366	-0.0162792859222379	-0.0153158352196012	0.0558044573834367	0.237767796076187	0.0932748602731386	0.113130502626056	-0.0626446527631921	0.00639584756928254	0.531554969189702	-0.00885229800645211	0.129522956962895	0.0638765605781988
-0.0500686231360512	-0.0181552757373477	-0.0532680472540528	-0.0555541092213417	0.100590326886309	0.187327606270618	0.139776977202021	-0.0292916149285566	-0.0461854373939297	0.214825818244024	0.496848504989936	-0.052513320606736	0.064916933878988	0.218280889415639	-0.0242621063547292	-0.0653026919929464	-0.038706204241776	0.214430712518995	-0.018978634516934	-0.0112309083155962	-0.0441480326038822	0.115073478650359	0.132374607018019	0.111077876418401	0.0398169206009956	-0.0593606210028637	0.193835514170231	-0.00194570608595187	0.149513730285771	-0.0343053514809632	-0.0163433271611171	0.145465841654691	-0.0169773327751424	0.162152403615321	0.014518900984609	-0.00221618073911553	-0.0239659259010865	0.00433229085246265	-0.00649775355994738	-0.0319657044097796	-0.0154305349674145	-0.00792764290396631	-0.0636442864843119	0.00169608096545304	0.183647116811639	0.403905093500233	-0.0565399024923857	0.148724808219051	-0.0193461367327219	-0.0508771690288197
0.00577472741624747	-0.00497250657718837	0.0057711433640168	-0.00834539201128397	0.0446667651570523	-0.0644399909815593	-0.050259094925905	-0.00571973459197938	0.0116044893322711	-0.0289871062120983	-0.0786815287950627	-0.0400777293131166	-0.0107860019736384	0.0393824346514897	-0.0273710162757474	-0.0216370801690566	-0.0279958152901427	-0.0040980358509671	-0.0455105644709484	-0.0553166954734467	-0.0372878950965371	0.053783461491297	-0.022835265000879	-0.0348136898393464	-0.0286310081270589	-0.0116982395632101	-0.0270897000782076	-0.0341919376772963	-0.0844447730992194	0.0593340070832262	-0.0336001100129082	-0.0783349743990542	-0.00888924383707495	-0.0114728454408773	-0.0349297947285278	-0.0388240845992534	-0.0363329793403888	-0.0152934833355249	-0.03214954577604	-0.0242304880134234	0.0253047395058209	0.0563384113342833	0.150555403565742	0.173573441847553	-0.0998971598511645	-0.0436468992850939	0.160069760478263	0.0231156311825781	-0.00014411982129068	0.0952296067628904
-0.0213379989110324	-0.012247075895408	-0.0213379432454819	-0.0382885600384642	0.0737324340429884	0.147916595476271	0.0776021767971332	-0.00728694140470575	-0.0370028423297436	0.0999120594682382	0.0808511318587345	-0.0437278926059529	0.365421691113915	0.0869047500292687	-0.0533517727691406	-0.0572991080028257	-0.0631657057997077	0.0812734193406266	-0.0150898572375051	-0.0315304642567892	-0.0159828667114578	0.0349405025837936	0.0626843515400958	0.323879867080441	0.28185657411606	-0.0592734446327623	0.0898498229778905	0.000530014272971011	0.344904762703745	-0.0344785000477319	0.0114755001337475	0.139195736469233	-0.0170401459186358	0.17006090103205	-0.00516910808854043	-0.0130490316082276	-0.0302026427204956	-0.0080620914976816	0.00275624864572162	0.0127182478915224	-0.0285639749364643	0.000544426071441631	-0.0682730541775231	-0.0654860920677181	0.120719751024949	0.0489098817903697	-0.0450443098384828	0.109818514870684	-0.0451842908844616	-0.0472240593350789
-0.029437025282352	-0.0407648301013727	-0.0406701162863825	-0.0407603515685941	-0.0318120116895771	-0.0447421596868139	-0.0483040754181056	-0.0308194295505275	0.0140556059889919	-0.0498187817689784	-0.0729699638999486	-0.0388255961477681	-0.0370311509533917	-0.034597837146752	-0.0523602557083978	-0.0466712030656617	-0.0549780192508503	-0.0361984837392499	-0.0495304682143807	-0.055679560517803	-0.0563257968027364	0.00447416818059181	-0.0570802424733265	-0.0554524948063826	-0.0392248635164744	-0.0100324450783757	-0.0395581354911008	-0.0195023846110877	-0.0883965735474006	0.0116937297216537	-0.0293110776577911	-0.047732134394794	-0.047544880954342	-0.0388266802132596	-0.00968985168873046	-0.0299688906847682	-0.00401989735490954	-0.0326016412126427	-0.00851872687175075	-0.0126813173383023	0.0185196896309672	0.146850144828069	0.112412244861801	0.289410293440298	-0.0640306204042606	-0.0213363351409222	0.150102651792302	-0.0211895127466337	0.105305437757373	0.0558716679362948
-0.0131429811990795	0.00194864572644402	0.0140613408038019	0.00444373172052972	0.140889346757634	0.343288031312336	0.112225518135663	-0.0169118449473233	-0.00794575836112275	0.0620933853025549	0.0879194598346624	-0.0162528164264392	0.159547596817453	0.12387868336243	-0.0294347617018841	-0.0191940949825862	-0.0119710146532615	0.0830462499522415	-0.029497507028932	-0.0267915884489125	0.0121401304203522	0.112116998788726	0.0849648906830327	0.260961126959848	0.125686223766325	-0.0404510202360092	0.108467495435202	-0.0158323013483174	0.221409690253611	0.00614865159896271	-0.00775381910059393	0.0946783400788857	-0.0293188975216246	0.341959309941858	-0.0355184637060501	-0.0118097561396908	-0.0274042887451127	-0.0184714561001252	-0.0304207368853288	-0.0406723194900062	-0.0438537665963975	-0.0323378995705703	-0.021174858829699	-0.0117829836468571	0.0443484499926577	0.107032250327944	-0.0140648921083885	0.141806768284639	-0.07273937439702	-0.0374124082971229
-0.00505500656384375	-0.0581232221917584	-0.0641685770528837	-0.073946044782287	0.0677325244998569	0.162315900841981	0.104376160444767	-0.0545275411116823	-0.0389835369559863	0.0393019044802192	0.106209629020502	-0.0376128326058821	0.358496708705075	0.10355187817782	-0.0371245942498804	-0.0580434357577295	-0.0786460109779956	0.04488915316885	0.0274731364841831	-0.0513676844083211	-0.0593152333318314	0.0242465561757961	0.00834565973766289	0.344507837895968	0.257496285205399	-0.0692933551864846	0.045244398293025	0.0128136173402036	0.489558546912891	-0.0467462510362192	-0.0563162529947006	0.25733134492296	-0.0261278143477208	0.290900831378807	-0.032947567284803	-0.00431637803113266	-0.0280893671914239	-0.0289669954278242	-0.0206289252967894	-0.0457729807513632	-0.0237931494835799	-0.0328956885193281	-0.0436134134298101	-0.0803841675997333	0.236576060895722	0.0876619880896359	-0.034885270926119	0.127660781655031	-0.0608596122807893	-0.0591262339597172
-0.0322501955926608	-0.0395337778074235	-0.0374170927987083	-0.0424098915242379	-0.0428790532186393	-0.0301505113572565	-0.0281264491160524	-0.0299829544349722	0.0110732102021762	-0.0368369349224115	-0.047745690928724	-0.0290952140561044	-0.0416347394126483	-0.0442460482597122	-0.0314926624732028	-0.0435611114064658	-0.0401869583609497	-0.0216536664700361	-0.0521114940796139	-0.0334424223332125	-0.0541562688781461	0.0033235641220669	-0.0336562331637855	-0.0506191677691939	-0.0398958506712784	-0.0361360726943941	-0.0262371829882789	-0.0275619897960814	-0.0960970932841208	-0.00552715618655349	-0.0397486006388803	-0.0312062742785231	-0.0480763960198002	-0.0494109081457478	0.0137334686835374	-0.0615236705196291	-0.0178500226048948	-0.0389192703471705	-0.0205807907465944	-0.0231668328932425	0.0175429077280385	0.149182096132058	0.0768955026771846	0.304609972915564	-0.0674703302551769	-0.0150484409043522	0.172663489166942	-0.0190210645970136	0.0893242266989476	0.028758820317323
-0.0500814884359043	-0.0196577996714782	-0.0182231432694281	-0.0350044034713707	-0.0663716033453401	-0.0542493979351005	-0.0288701372191074	-0.0330401505781458	-0.0264871091713345	-0.0654787679078377	-0.0693831447820577	-0.0311347963302297	-0.0558683844318044	-0.0586430188564838	-0.0440330970390272	-0.0170406736794198	-0.0124124252125837	-0.0704893157808101	-0.0434599169068363	-0.0572418266146801	-0.0447900550429328	-0.0509563627094413	-0.0542865650651666	-0.0556543112842191	-0.0169776109725009	-0.0245185624183548	-0.0491365954350695	-0.0346877463415903	-0.0358407095012151	-0.0272098912051034	-0.0348061798164369	-0.0336103274454979	-0.0254664535781169	-0.0569052780660272	-0.0276177608640392	-0.0360565455653572	-0.0401035984471802	-0.0512935526662402	-0.0535446465235287	-0.0370714947054585	-0.0263466921137233	-0.037943012899514	-0.0627470417550214	-0.0574046940919505	-0.0598747042109546	-0.0655652027219722	-0.061578739091669	-0.0641165908562918	-0.0480469459851859	0.00122075385764115
-0.0379892927215666	-0.0460614723821733	-0.0278915016366563	-0.0159026532370742	-0.0639071621168274	-0.0543224755884683	-0.0129653176715792	-0.0673448127585453	-0.0303713336431568	-0.0617079835965806	-0.0548525818635498	-0.0132116689742497	-0.0968835682986568	-0.0767589873729933	-0.0328856604781368	0.00273450037381487	0.00954359627158643	-0.0720883969845522	-0.000346098919164866	-0.0277652029929772	-0.02076279950204	-0.057138581187625	-0.0444914530742771	-0.0662709945970954	-0.0264132459055787	-0.037040212945616	-0.0495421831882907	-0.00756471388399784	-0.085902435048617	-0.0443848671867358	-0.0535113314520168	-0.0509822736454112	-0.0461407968065223	-0.0278653055884467	-0.0365596823740368	-0.0349515470037005	-0.00344906973662751	-0.0303383762353989	-0.0160985143046019	-0.0400449938494239	-0.0342636977341072	-0.0473912954653673	-0.0415378143566668	-0.0381444135272756	-0.0436021469064733	-0.039524777646654	-0.0420053024302994	-0.0722756591163347	-0.0641206378290488	-0.0517630463872554
-0.0644804211531284	-0.0637761948471883	-0.0639430310039751	-0.0506194650158441	-0.0890994936520355	-0.0578534095657016	-0.0464433835986764	-0.0667896807766771	-0.0685297781918304	-0.0669082583429467	-0.0597649690540422	-0.0599380610442044	-0.0873852710578885	-0.0775662539950918	-0.0652394255398546	-0.0518792278688505	-0.00417430426180913	-0.0662754634826457	-0.0526761747644113	-0.0465835353900585	-0.0409713601823015	-0.0685384479147374	-0.065606408967381	-0.0620128920716309	-0.0261684036215824	-0.0520103743737165	-0.0570237732330271	-0.0299932921814969	-0.0742453097789124	-0.0366046103061203	-0.0610370344298145	-0.0864416585159682	-0.0602723978908587	-0.0485454814502849	-0.0328390848322767	-0.0592291852716655	-0.0339498359318726	-0.0172226075300705	-0.0022118463253508	-0.018329426783071	0.0207936734767226	-0.021198127704096	-0.0558619181451221	-0.0596663513937881	-0.0738185662499748	-0.0647875838768057	-0.0554458386099656	-0.0837755080527517	-0.0356243307810458	-0.0239039507648448
-0.0514366872832121	-0.0566231000916646	-0.0516947250620925	-0.0296956904122716	-0.0820272853048063	-0.0504550689919407	-0.0486015688011855	-0.0514432663452611	-0.0298003593545058	-0.0678454627737613	-0.0529846840041793	-0.0573040847735125	-0.0590491855946153	-0.061998295817557	-0.023395269214136	-0.0274120566583447	-0.0344273844607872	-0.0485036252637383	-0.0442834588007927	-0.0200960826781921	-0.0484533678891724	-0.0548143207588868	-0.0794874502248535	-0.0764862434672157	-0.0618570184793328	-0.0435183719930187	-0.0758457987503422	-0.0410538923871024	-0.0566876510438744	-0.072538147406587	-0.0659313604106161	-0.000645044268079531	-0.0309276349307838	-0.0784114105520375	-0.00767456897516113	-0.059495140622826	-0.00822887109962203	-0.0637076773293862	-0.0143342757493681	-0.0219942702595921	0.016538770427496	-0.0432538400797639	-0.0356279597949313	-0.0365067644567468	0.00241606835263764	-0.0545753270671684	-0.0539076588867067	-0.0665717330188825	-0.0149911734064726	-0.0116372911930242
-0.0269094967979727	-0.0235162383928561	-0.0203320086561112	-0.0412084834447315	0.0917075001458195	0.228915434380807	0.142681340411529	-0.0249017429128461	-0.0444319822421238	0.0696463440694098	0.0889952406301729	-0.0495495323733374	0.461210561613938	0.118429208328119	-0.0436471205741315	-0.0578568477356304	-0.0783332433491994	0.0219815949173535	-0.0538261082663717	-0.0284890849254765	-0.00437690931021929	0.0453696783765712	0.0150271667457832	0.506235970621384	0.278182597150998	-0.0758722973665927	0.0920321155920139	-0.0248410112596495	0.519369415521445	-0.0106393581441063	-0.00965970781867058	0.186508508942815	-0.0335647667119664	0.215813969090202	-0.0466503265129223	-0.0633803466456035	-0.0703980627887508	-0.0197241038367671	-0.0197287769164138	-0.00288450302700244	-0.0408784096051068	-0.0278690036943736	-0.0455410908214067	-0.075251842114445	0.125938561705649	0.0370300222779247	-0.0422838736578598	0.163243660830787	-0.0292007822624692	-0.0670204432171499
-0.0344900269843842	-0.0454223059012728	-0.0487401761916369	-0.0162291927157281	-0.10524886534521	-0.0547791379911004	-0.0701363048993651	-0.031852257445435	-0.0360213969110732	-0.0795630898772743	-0.0579485303341219	-0.0470222809521225	-0.0324506636959079	-0.0528279051615776	-0.020811532589495	-0.0466858707742076	-0.0426698479525392	-0.0513918303848578	-0.0480918409780209	-0.000221994206871127	-0.0378939496653746	-0.0610369905757105	-0.0583543997135846	-0.0502279130936347	-0.0201675842828179	-0.0545800505022475	-0.0469492432053666	-0.0188668764664569	-0.0596147137313226	-0.0672537588193957	-0.0402015245483726	-0.0773185696605519	-0.042030155203602	-0.0578388935848964	-0.0226786692628023	-0.0694638826889601	0.0191312709873653	-0.034391350898484	0.00441773269530394	-0.00919577538208689	0.0411853302562371	-0.0193277397205915	-0.0459309336600844	-0.0549852467051413	-0.0723505538894743	-0.0733998878524702	-0.0483873780432522	-0.0473742709639346	-0.00654597638834066	-0.0122330748571677
-0.0396190876650421	-0.0608042546513365	-0.0568583485794276	-0.0273924724678008	-0.0836550887868749	-0.0503419690503107	-0.0402847462843499	-0.0518595996704521	-0.0459019766733949	-0.0824721699842343	-0.0705241443113211	-0.0496749978529214	-0.0618310444588136	-0.0614717078726957	-0.0316247638383166	-0.00405998244351889	-0.0411160478312831	-0.0726325488783406	-0.0522871876946209	-0.00314161613551356	-0.0166696467711066	-0.0594626941006498	-0.0614872156185712	-0.0630073318148798	-0.0530740916741137	-0.0336247352480966	-0.0603018962196083	-0.0282406665222369	-0.052976045517556	-0.0597848873499651	-0.0647967318666301	-0.0119874893250583	-0.0284958640518144	-0.0667153637478219	-0.0262727749582117	-0.056480167895483	0.00159921276165654	-0.0416365775759776	0.00608368996228332	-0.00846127967297639	0.0133135506991185	-0.0108858759882036	-0.0312867718193289	-0.0107242309898544	-0.00372703063771041	-0.0642098831345284	-0.019659130654214	-0.0555550510383155	-0.0401315113711379	-0.0202114751109999
-0.00269891490734556	-0.0312865684094426	-0.0221097305041081	-0.000896642493527819	-0.084111666727187	-0.048660455503988	-0.0521330638643799	-0.0303635451914086	-0.0124787253798584	-0.0848816605305271	-0.0530825233425893	-0.0248154142881793	-0.0497325260829914	-0.0760530989273266	-0.0360628355868056	-0.0207134293123567	-0.0250408354939568	-0.0728256333098931	-0.0565936244453398	-0.0388515612086812	-0.0329255319769596	-0.0614877441136862	-0.0618393684538519	-0.0692254405313106	-0.0129781487782179	0.00288842435286254	-0.058805816933276	-0.0286460817468678	-0.0645034260225733	-0.0128841421814372	-0.0276062589730922	-0.077143461429625	-0.0175309346265307	-0.0468158008836416	-0.00555943863898311	-0.0454574021021211	-0.00822633310466786	-0.0354934267387147	-0.0294621704748967	-0.0366832524838233	-0.018166227101587	-0.0321754438770937	-0.0663220495979191	-0.0513427176340798	-0.0806614418114441	-0.0632667888712101	-0.0430438570866948	-0.0684771198492213	-0.0307725933210808	-0.0027397116832947
-0.0646787731944311	-0.0685615916971346	-0.085912208488644	-0.0581102761119225	-0.113419520329538	-0.0574431520311307	-0.0682572318032949	-0.0610353588848528	-0.0589100965815845	-0.0686469407909955	-0.0570869837100893	-0.0612175524307124	-0.0645450254560776	-0.0817505213510811	-0.0405141851655166	-0.0332923913205937	-0.0574721455304135	-0.067253837674731	-0.0635846193333566	-0.0257470537368295	-0.0504870816287213	-0.0824276113178539	-0.0830541663394292	-0.102966161550433	-0.0734208158020171	-0.0486956741248421	-0.067360236168332	-0.0472555234021023	-0.0755768213199708	-0.0759625856841332	-0.0736327797872535	-0.0288042194718659	-0.0501247823563499	-0.0868759974686513	-0.017824000678094	-0.062753981644883	-0.0271162344984873	-0.0605604140009091	-0.0223255214076579	-0.0318304545324241	0.0189383356019816	0.0130650299936313	-0.00753586073226233	-0.0257139992418956	-0.00815758567089786	-0.0769188894994104	-0.0465306634435654	-0.0601440768867418	-0.0176546274769569	0.000928040963411323
0.0433903905651844	0.0812399173387792	0.0958473244810348	0.108149298716913	-0.0481187383425094	-0.0270474927739319	-0.0592611070078585	0.075770271264489	0.0788194634785495	-0.0694282125905503	-0.028443196210587	0.045562416501568	-0.0333823745991993	-0.053815819299782	0.0590878954526582	0.0668180325227917	0.0877411565356301	-0.0474844318640124	0.0463586946478263	0.0417064132246689	0.0363880857452598	-0.010896332627053	-0.00726282761491327	-0.0377749488915915	-0.0168755281063288	0.419202443715731	-0.0374673510403226	0.00466990129428317	-0.0710204713128638	0.248473298891424	0.101075202356386	-0.0921692551262888	0.129812125876677	-0.015886942537565	0.0371516750259312	0.0963458986252505	0.116167750905506	0.0723634772137725	0.0630118002166851	0.0524272103789167	-0.0540675858497407	-0.0461829562354172	-0.0448378806877193	-0.0268042722646294	-0.0971058651049681	-0.0260847744322179	-0.0395904909001417	-0.0547417787749367	-0.0379420002610491	-0.0339753890094098
-0.000673299738393169	-0.0221494082770261	-0.00406042832396316	-0.0226681380193315	0.00849905737573396	-0.0596225114329951	-0.0504323533572571	-0.0238473378015424	0.00276210357294337	-0.0464902744109818	-0.0629631472547346	-0.0326299844669461	-0.0199083034963383	0.0036869308175024	-0.030699085711629	-0.0252634080899527	-0.0220162115935641	-0.0192356087025131	-0.0281599822253683	-0.0573413059429589	-0.0345395740723687	0.0362094947679729	-0.0141197702697677	-0.0466179823728511	-0.0394098443451902	-0.00233202024761228	-0.0420108531496283	-0.0302250119204614	-0.0900268635077424	0.0464691198168823	-0.0368643798155942	-0.0579805944274177	-0.0059053962840708	-0.0149121976774468	-0.0373516629410718	-0.0354324697197915	-0.0293541012450097	-0.00462973840034422	-0.0252813598197738	-0.0203589651430064	0.0150519406149391	0.0595233555730121	0.123455260265982	0.093428791215243	-0.0842974320058159	-0.0292926099162449	0.0941245068207656	0.0033360928376382	0.00858004066820604	0.090594378031592
-0.00746715345841849	-0.0259500617621298	-0.018635358493898	-0.00744842616145486	-0.0762963677905592	-0.0430323874641459	-0.0419345627368757	-0.0300959394168477	0.0508880473889775	-0.0552474834768905	-0.0531922721175283	-0.0103367155490064	-0.0444832547666631	-0.0692151082849327	-0.0250649121519925	-0.0135682456947801	-0.00447957737824523	-0.0432879619902974	0.014286377424165	-0.0357690638214601	-0.0204996318893552	-0.031892274208201	-0.0623816874130888	-0.0150900785645086	0.00928698471238313	-0.00677144079284418	-0.0502504768186611	-0.0343406531603041	-0.05161787691482	0.00406875174696798	-0.00613585723538404	-0.0514563874614972	-0.0193262828739829	-0.0256869739044398	-0.0027026846647472	-0.0176225103445843	-0.0162193371663628	-0.0288204794707695	-0.0203188384967939	-0.0184751097458074	0.139698318286114	0.0672180889435222	0.0502674913139748	0.0527838341127574	-0.0718498163410671	-0.031022085565062	0.105062883911522	-0.0371188050243927	0.115860234679823	0.146515255643991
-0.0269019335272707	-0.0170391399769012	-0.0253301406899152	-0.0165390652123136	0.0972333964476746	0.251577099334694	0.0790124322530358	-0.0266922222931744	-0.0316384248201357	0.0956061318123858	0.153665676379684	-0.0259911568068737	0.204363380565698	0.0817770480040637	-0.0538623600352503	-0.0352425419129394	-0.0351111031900555	0.0621329922171539	-0.0520797255545225	-0.0265246245367624	0.00357413380559077	0.058223135745344	0.0676455092404077	0.115427646533281	0.217485332244499	-0.040154075620716	0.0933364168626309	-0.000855966576478793	0.114834137642436	-0.00989508701745067	-0.0220262085088025	-0.0171333602319887	-0.0262082875697571	0.406217995495854	-0.0103524617966381	-0.00151758381443333	-0.0148177176471973	0.005526905377704	-0.0163254716830747	0.0110340800120759	-0.0507459548533822	0.00846060141710898	-0.0252705721005315	-0.0329380235599934	0.0249933587642081	0.166986157123064	-0.0233928613267145	0.078779283671301	-0.0816796322164684	-0.0298397169291689
-0.0289404501687551	-0.0386786212272041	-0.016335184979642	-0.0318606803382059	0.110036466043316	0.0533607069000651	0.088025850912896	-0.0553234010982858	0.0227245166764739	0.0288038145799566	0.142550534509786	-0.00432561012637464	0.0272371409202417	0.0438315989098726	-0.00595816569439211	-0.0289062606998151	-0.0223369506196629	0.0090092133463794	-0.0246426634276762	-0.0115809914325784	-0.0114097090740957	0.0603759651199267	0.0589999708383772	0.0573890298819407	0.0426086775160312	-0.0220711726824429	0.0293369895681802	-0.0129849349962486	0.0575133456073775	-0.0247175062507836	-0.0401569909619575	0.125179873781482	0.00726033963704419	0.0824649060752187	-0.0401718163110655	-0.0378292258173569	-0.0286302657659758	0.0028106100455452	-0.0238448966729074	0.00883136415546796	-0.0358074727505376	0.0256636439699897	0.011187708463917	0.000276026258015365	0.112990282547838	0.225699369525911	0.007318234496755	0.0372872418913465	-0.0642941257481764	-0.00041602529330201
-0.0584079289710406	-0.00430545974108085	-0.00685363376774399	-0.0356541351456721	0.373919387779896	0.193825135497939	0.148738192258783	-0.0244983954982958	-0.0476016775284993	0.412760239255418	0.196800623914679	-0.0354142377726408	0.0447161098633664	0.498524693545336	-0.0527455868669804	-0.0490907141970262	-0.0256260357340467	0.335183759217427	-0.0917897323749179	-0.0103965970329418	-0.00847971303010062	0.419653865877127	0.463770374409402	0.120255254959202	0.0625495624946764	-0.0645368051778314	0.559335563296222	-0.0398827527576623	0.113297897589739	-0.0175442846453184	-0.00850434481117807	-0.0046532910803315	-0.0221144711118296	0.0498183255684568	-0.0298390885088936	-0.0398254464044984	-0.0543848848021937	-0.0123714083073826	-0.0423056282498087	-0.0291887147493972	-0.0536570515029464	-0.0479941135887514	-0.0066409812299735	-0.0223923511384229	-0.0209742008383396	0.214892662468128	-0.0233803114241511	0.342142200481906	-0.0570784237017797	-0.038156293838077
-0.0328571662413797	-0.0285503095468015	-0.0288452226179431	-0.0502227644816961	-0.013054475224068	-0.0607143704312883	-0.0668504335357376	-0.0343378114083517	0.00889292535367541	-0.0273742324723612	-0.0606109814556623	-0.0377133047536332	-0.033709861956416	-0.0127496778969867	-0.0470003477730063	-0.0407302199250471	-0.0197205381352967	-0.0306555473743552	-0.0331502154167637	-0.058266385222952	-0.0680720958522107	0.0285241539683084	-0.020749801892441	-0.076870431400987	-0.0550289369785415	-0.0264986411897872	-0.0233671589613685	-0.0439861217625219	-0.0644137496426652	0.0245966214620211	-0.0547242601762597	-0.0524584890196809	0.0132343577677183	-0.0487697451587276	-0.0536428066452128	-0.0661745186921876	-0.0436854237017795	-0.0503562053580985	-0.0446578437206467	-0.018863054061288	0.129184946185203	0.100540667980827	0.087713158333654	0.0266234589448883	-0.0445883343950514	-0.0230558585731532	0.0815434091115319	0.00350032293669166	0.230095893891649	0.484119290576738
-0.0288494579440741	-0.0365854073550491	-0.0372490931132956	-0.0471041970476452	0.0810200679747098	0.102950346353759	0.103479447779055	-0.0383761041716072	-0.0373789582544012	0.0374735632996717	0.0881887074747713	-0.0338317328156169	0.335417954326859	0.0841034068633654	-0.0272602998710845	-0.0509211689048102	-0.067892490010644	0.0558715626504347	0.00990091740099005	-0.0363860875216144	-0.023589788757003	0.0399219313403585	0.0452587778720833	0.424779198078252	0.272811578918785	-0.0597385788637919	0.0282916372303521	-0.0193324078464283	0.355051322572534	-0.0233717976670597	-0.0290595690612922	0.19605154232542	-0.0373831753545181	0.247883136580808	-0.0523655904867978	-0.0332099740236877	-0.0563929943638099	-0.0565221682069894	-0.0291627947454469	-0.0285936886189106	-0.0288892289773398	0.000850029046762215	-0.029937818741922	-0.0585520265631879	0.182797474127099	0.0693051964450283	-0.0117757797240623	0.11941371904094	-0.0445340879372063	-0.0574918388202445
-0.0709440741276712	-0.0359026540393265	-0.0937157263348919	-0.0985831210436138	0.14841030912334	0.0756460411301794	0.142693906677801	-0.036603382251277	-0.0637622951775133	0.283597364312274	0.377838578652262	-0.010273742246976	0.0453326398582593	0.181217275244195	-0.0149307975507147	-0.050493004126577	-0.0780554860146412	0.146784247473751	0.0247739192014467	0.0014705739710719	-0.0567805790846992	0.0911097147197561	0.146429798190566	0.00222816034865814	-0.00307569542632019	-0.0661116720645054	0.141267363814689	0.017463216640911	0.0959068182702024	-0.10564745048682	-0.0252747326982744	0.274930561037982	-0.0374271742442062	0.0828951461640013	-0.0105187229921708	-0.0200092450406917	-0.0374986832570247	0.0125274760602543	-0.0103889806370525	-0.01308081015223	-0.0225976386584238	-0.0514204840619116	-0.0750275136770618	-0.0653487383229462	0.242012027370584	0.380631423458344	-0.0571984217983507	0.195309338215562	0.0154213775397016	-0.0140483105718787
-0.0383933925446334	-0.0506277672324848	-0.0623322932327429	-0.0384279996539888	-0.091424645116889	-0.0570054126361547	-0.0785809277346339	-0.0468771530143105	-0.058939370317336	-0.056222124134746	-0.043285572314222	-0.045087828542018	-0.0691885554401489	-0.0737745913232057	-0.0525536888057852	-0.0174673820704568	-0.0364074061008747	-0.0588103659405819	-0.0764117966509722	-0.0291588534513703	-0.0214918927656643	-0.0586543311755868	-0.0696878889854786	-0.0835182193575013	-0.0390013251717284	-0.046687185737009	-0.0464856405928145	-0.0476745838224294	-0.0831544314540945	-0.0539175927486409	-0.0513960657408564	-0.0780321338528358	-0.0385223895891713	-0.0555377964017878	-0.00365847710094227	-0.0763337107709741	-0.0293195257900838	-0.0610169976095357	-0.0308354368079872	-0.0391599555771426	-0.00380753246306347	-0.025601830399288	-0.0417149201142817	-0.0770424901936737	-0.0638826933102606	-0.0712666919307665	-0.0315436576650229	-0.0497889052290252	0.0190112763222286	-0.0152692045730991
-0.0124032843603104	0.00877671376489193	0.00905869732609544	0.00769646205534031	-0.0742780877733587	-0.00921040011088753	0.00684794311954219	-0.0133376234854589	-0.0287739029520986	-0.0425455879283624	-0.0256980465959297	-0.0244768499674336	-0.063123610406829	-0.0811907400596615	-0.00561795168977298	-0.0234462332094084	0.0346644119171239	-0.0426807657155975	-0.0733787525924661	-0.01175667502112	-0.0117215461178134	-0.0634782329840567	-0.0464347897976223	-0.0383298404654446	-0.0454945819245224	-0.0329495788550124	-0.0398789593275922	-0.0447949765334653	-0.0324538328543753	-0.00916918410241573	-0.00775110195340318	-0.00783184682149787	-0.0270435088301847	-0.03947410011878	0.0127135344900971	-0.0565887030872982	-0.0608161832024384	-0.010670726821325	-0.0388131672332471	-0.025415461303837	-0.0218241128297305	-0.0174143568647987	-0.0933068788267859	-0.0568370344254727	0.0139172241536683	-0.0545152778112085	-0.0792592859571327	-0.0594641157895734	0.0129541840514278	-0.0210979191293543
-0.0166164741090505	-0.0255285394822712	-0.0178616351796517	-0.0056619430657107	-0.0768065601027128	-0.038669607402664	-0.0479275958969216	-0.0321418429616681	-0.0339916428127197	-0.0652987412053704	0.00399245711933696	-0.00754835211010656	-0.0376746706322391	-0.0317465721102289	-0.0734618220486706	-0.0040599200695875	-0.00766238925709421	-0.0597076974395645	-0.0539857292567466	-0.0396187496118862	0.00419763564796111	-0.0452540344527705	-0.048282496692307	-0.0342496116977826	0.0261765410616442	-0.0387443900091952	-0.0258054921537731	-0.0312573173805273	-0.0171903619552742	-0.0491668802283234	-0.0241378823678194	-0.0452156532995166	-0.0580431377630312	0.0196124559023967	-0.0197538508650496	-0.0342813270371644	-0.0245128019240744	-0.00648357923055822	-0.000549465498177076	-0.0309330327372655	-0.00633466490449019	-0.0457354031788282	-0.0684207869041145	-0.0531927873585689	-0.0328141925962588	-0.0437099489779853	-0.0454660790636685	-0.0331838900469555	-0.055520660673556	-0.0620849810963162
-0.0303724890731365	-0.0515299083808497	-0.0507386018093883	-0.0501905302912405	-0.0772841478918615	-0.0511180396778416	-0.0498541170718347	-0.0374867952240083	-0.0643422507183989	-0.0523247813519921	-0.0515664468906363	-0.0323972073761492	-0.0661186941377361	-0.0683148378509165	-0.0368018903279061	-0.0121294436819756	-0.00838348441548339	-0.0379935496709921	-0.0596291512579142	-0.0255679733149508	-0.0127106606673069	-0.0552775788636547	-0.0687067473768128	-0.0549208130539707	-0.0467381046793612	-0.036483522157593	-0.0588796011983564	-0.0553832168740407	-0.0605165060410611	-0.0552928261827209	-0.0441052193038787	-0.0673310513459128	-0.0180616236939118	-0.0600300151533061	-0.0101672318835248	-0.0421132302327084	-0.0404036587901949	-0.0429612044961842	-0.0543462763695289	-0.0375472240179103	-0.00656533370440126	-0.0488047813408061	-0.0475375527227636	-0.0392377046055697	-0.0527936968365967	-0.0738295430373777	-0.0643583639870613	-0.0625011270059964	-0.0093780270070735	-0.0374533964660755
-0.00819185498792853	-0.0491683438310995	-0.0630070584163757	-0.0290174777764169	-0.0869061442913831	-0.0581499860411901	0.0526711741260599	-0.0702779178831611	-0.0633689622109972	-0.0565262193416859	-0.016958911539118	-0.0141412263252099	-0.073203398179189	-0.0650246161996308	-0.00190197374375737	-0.0143538539664004	0.00491161142986994	-0.0458164272575816	-0.0131197083254715	-0.0207049577887199	-0.0252669432752947	-0.0649744992408559	-0.0490848795821846	-0.0571711532283923	0.015000106521853	-0.0587422119209537	-0.0525708461673962	-0.0439568870174167	-0.0755952055469832	-0.0799313708630898	-0.0715341521683354	0.00763501443552606	-0.0518014733513393	-0.00404532274988531	-0.0631514961878856	-0.0448988007931122	-0.0230132673140881	-0.0270842647641375	-0.0152137468522914	-0.02822338268824	-0.0129072188301857	-0.0303661147428084	-0.0542009356795482	-0.0667786903975023	0.114887781873227	-0.00288911536047915	-0.0750919158870351	-0.057486359553063	-0.0130867876346646	-0.0692608849566522
-0.0224719719327204	-0.0249369497958693	-0.0607714049069041	-0.0691933805461455	-0.0803460348870811	-0.0570305671337129	0.0395232559220242	-0.0367456527593078	-0.0635743303831652	-0.0479045385042128	-0.0124076873036636	-0.0240258859417644	-0.0632160187805661	-0.061636022429077	0.00965021614503355	0.00151622006378737	0.00855718064548042	-0.0466552193317556	-0.0152270956369855	0.00182334933127948	-0.0223512466086688	-0.0556049973212057	-0.0598051577716646	-0.0604772807135015	-0.0348259588316857	-0.0581024338198458	-0.0562813377087442	-0.0338549738301876	-0.0380151554529385	-0.0888704028141809	-0.0384755362450466	0.0255404872891068	-0.0634736506237037	-0.039133140924551	-0.0368660450894073	-0.0503304293336469	-0.0626991739342531	-0.0368988048101111	-0.0446751223437689	-0.0293735013393681	0.0182835482208119	-0.0282550844704957	-0.0867375528623022	-0.0965834403562132	0.102609034405513	-0.0344885014603156	-0.0917394237412156	-0.0601214721484954	0.04414263507935	-0.0124793764999739
-0.0380800824617297	-0.0142582138669249	-0.0256053870888424	-0.0259282832226389	-0.0772205306094683	-0.0598311060111767	-0.0532659614847214	-0.0195419187208416	-0.0651585340202667	-0.047957382233557	-0.0372462587201814	-0.047245446332439	-0.0210530287343892	-0.0625469469927072	-0.0700920957807399	-0.0268185049328086	-0.00975315514100597	-0.0446870062151759	-0.0380680496382148	-0.0695037789702034	-0.0387039148841611	-0.0621834978317325	-0.0774868094356988	-0.0339468187836835	-0.0337647809374001	-0.0680745268753894	-0.079076650553115	-0.0564623481959954	-0.00280149932559672	-0.056543924182656	-0.0159658291294151	-0.0116564730483124	-0.0464605437741965	-0.0556799456134519	-0.0253742640437002	-0.0686313826935332	-0.0644016161942915	-0.0493425144945793	-0.0408308213677999	0.0108855654404651	-0.0130440334648409	-0.035094354663437	-0.0755960836723121	-0.0435700981991664	0.0168134664857216	-0.0928139332565017	-0.0752083121250799	-0.0567863102059065	0.0402271604032974	-0.00578018340582198
-0.0256179943930167	-0.0365792118443594	-0.0592092675793194	-0.0551908618297085	-0.0455387278557067	-0.070413699822914	-0.0530265190893952	-0.0299567184281834	-0.0447306016289941	-0.0189690153828032	-0.0200283357080643	-0.0322875992407551	-0.00473505647754351	-0.0313349982018661	-0.0527338453452768	-0.0110120408585545	-0.00256161035452165	-0.0189171402216691	0.040287971100511	-0.0485165120058824	-0.0374062145385904	-0.0584746644338267	-0.066289474253261	-0.0366251632807935	-0.0422671906084397	-0.0644670990705027	-0.0784746447924187	-0.0118392116528779	0.0385649540442693	-0.0660086618575766	-0.0260691416737689	0.0697919262442766	-0.0627797390540386	-0.0645755215828757	0.0058460509280959	-0.0204742417995847	-0.0420773002970838	-0.0224000442580221	-0.0281438520301484	-0.0197176667847602	0.0113217459745891	-0.0415066275964752	-0.0542698751895958	-0.0463893947780961	0.0793403298689224	-0.0879059203002712	-0.067805563735462	-0.0308762181120483	0.0587338376673076	0.0118446060279938
-0.0527204746070264	-0.0151953218534721	-0.0402226146495159	-0.0697054455537259	0.286188862096472	0.0632593052492024	0.0571206850972209	-0.0325201313779632	-0.0491260595869681	0.378662868782458	0.111471733369978	-0.0532982053863539	0.111335604300686	0.364645967678613	-0.0621568306148315	-0.0583183903134482	-0.0528581032740659	0.218566572789508	-0.0149500937775977	-0.0496541813750286	-0.060180838385397	0.25283765977025	0.350177430512699	0.0190582724687136	0.020890752528086	-0.0506891963757586	0.299306704816941	-0.00954244978789572	0.069882974975909	0.000666839038382529	-0.00805824283755793	0.141251282776429	-0.0246003370518214	0.054751685813328	-0.0281487323613198	-0.0264686794038825	-0.0402389175990659	-0.0138601000542114	-0.027244526237658	-0.0369754037249767	-0.0602878153797958	-0.0248777454233343	-0.000598197175614831	-0.0665478244031785	0.0780309841305878	0.107333516987534	0.00374634817027411	0.339430702372606	-0.0385863233221348	0.00422541107392872
-0.00371417807485238	-0.0135259494110235	-0.00733471446151731	0.000780470070676145	0.0482838459313699	-0.023470305908789	0.00529669644971462	-0.0161539839685729	0.0131045304103346	-0.0194580823614491	-0.058445565023638	-0.00401650803013167	-0.0111430909739044	0.0372071058788959	-0.0464602943034922	-0.000267717230275967	-0.0335838380934219	-0.0136462414123732	-0.0269675188964339	-0.0401338981732155	-0.000706025265211952	0.025666438203415	-0.00216661305790588	-0.0246426818173594	-0.0374881628418988	0.00955267593928068	-0.0127836578595016	-0.0100397528720338	-0.0583599913531821	0.0796073436557103	-0.0130750550408387	-0.0332225705836567	-0.0286544748026908	-0.00631800232765583	0.0193825678199335	-0.00736048132748214	0.0307634808961643	0.00389851184398501	0.0217169355877408	-0.0246879980299101	0.0756288674205125	0.0620238126972835	0.115435918171351	0.0648860214484836	-0.0539494858105464	-0.0325887420305366	0.11882779093421	0.0251716701276336	0.0368239563388939	0.0854143655808377
-0.0128961626991674	0.00433643994516074	-0.0198848018153364	-0.0266887933585444	0.143108464444705	0.168601780793781	0.0794306874974964	0.0105509586519294	-0.0444239632475805	0.16590340013468	0.239662704596266	-0.0278049779079683	0.14234615379059	0.103628907057786	-0.0612456782402369	-0.0533234844041255	-0.0493648952747737	0.140074738909761	-0.0284166094443192	-0.0195475730313132	-0.0130908310798832	0.0972668153662822	0.0553210471527892	0.102104503575623	0.120056448399144	-0.0606543079264594	0.0996580995596962	-0.00938785511547307	0.142255945521451	-0.0268082847532001	0.0140294816581989	0.111950183710546	-0.0369639561574455	0.115357699069932	-0.00228745214628832	-0.00552820848482336	-0.0260797780302129	0.0315718287570851	-0.0110568276335799	0.00181608079860609	-0.0368232338882301	-0.00630725807537983	-0.0727891975423222	-0.0272492685677056	0.133114630196204	0.099005058776234	-0.0458615701203739	0.12645744112776	-0.0108350635489895	-0.0437441290431389
-0.0371051533932053	-0.0227709648418275	-0.0509688129315786	-0.0266693499166998	-0.0749044483444797	-0.0430020355860389	-0.0958482794902248	-0.0182429325692345	-0.0420689466750944	-0.0772097573075815	-0.0450794171186098	-0.076801417716948	-0.0430535507101235	-0.00303551179526255	-0.0609763746183173	-0.049831182407463	-0.0471155718319233	-0.0274610965032267	-0.0505439519763893	-0.0622737042792593	-0.0622519161470879	-0.0253928405000451	-0.0611499459898834	-0.0414192894785793	-0.0504020870528017	-0.0324940228700489	-0.0125476426944532	-0.05285739276542	-0.0345600989278329	-0.0313241803381277	-0.0371804221966809	-0.042066227046885	0.00347357173569207	-0.0395166293001198	-0.0370929604621448	-0.0657081944647727	-0.0270992834922999	-0.0578523227407586	-0.00815420160340737	-0.0160014003151205	0.243033159178382	0.0325164263936101	0.0106388907865345	0.118257609640386	-0.063189660362582	-0.0806797652077352	0.108496046304395	-0.0126882636220242	0.202316991311915	0.0709521459429775
-0.0193429725076025	-0.0431771306015599	-0.0394912913971824	-0.029695563048975	-0.0349651489951969	-0.0542806576453506	-0.0617513677477213	-0.053375852749032	0.0378059003885616	-0.066332361236058	-0.0734347932183432	-0.00976753288805235	-0.0352667574642251	-0.0490472048669849	-0.00543985620241565	-0.0251707543290637	-0.0374220646567276	-0.0583911777127215	0.0362757507172486	-0.0161364680700329	-0.0367210607765822	-0.0335147471147963	-0.0727491831162164	-0.00265172714050079	0.0123664041139555	0.000447889522749804	-0.0559750971801507	-0.000230620554106552	-0.0308566834563406	-0.00996576423661658	-0.0208891538245009	-0.014210027901768	-0.0326974602311885	-0.0216867434066891	-0.0226576971084697	0.0154024908814334	-0.00190320028534433	-0.0411412554465105	-0.021104770079365	-0.0288325935828896	0.0821630230384236	0.0682473101406175	0.0818513264374973	0.0793907313220577	-0.0723898583282356	-0.0366894790102995	0.0714724555046066	-0.0366601035244793	0.0966845392618261	0.11991595825836
-0.017218483984982	-0.0337739006609184	-0.0261125007120239	-0.0178463382254583	-0.0544351719742917	-0.0500004210048705	-0.0501802050964414	-0.0369075694819033	0.0464336004238605	-0.0710570495168238	-0.0732895504743835	-0.0104457134277252	-0.034174338354419	-0.0575998717726976	-0.0304525550954713	-0.0223285173344113	-0.0203994807848817	-0.0594124998084299	0.0480829729509179	-0.0230719850471829	-0.0329687328218181	-0.0281980655971979	-0.0686579652604818	-0.00828940590791549	0.0153939000208322	0.0186189373997659	-0.0548138513204938	0.00435396412471976	-0.0363729111212943	0.00422230239101684	-0.0164803866378459	-0.0159293736186823	-0.0203116239281278	-0.0137975367108534	-0.0301796513269499	0.0335772280979179	0.0145644572267089	-0.0280260231457897	-0.0134319523738171	-0.00962698456503707	0.0736114305630365	0.0297084450091676	0.072684817322551	0.0371057855238249	-0.0740837690958473	-0.0426510877058763	0.056341151309106	-0.0396273525488154	0.0642066375091506	0.105606769387264
-0.00555845021804202	-0.00114944890100516	-0.0168627069806313	-0.0159562747699868	-0.0111568633855547	-0.0493118476108391	-0.0632249209847773	-0.0125224138406932	0.00611811628718288	-0.0480368340531088	-0.0586216119360614	-0.00908226471953662	-0.0184065307517829	-0.0151426650199541	-0.042469473090464	-0.0155741840172517	-0.0252332503627972	-0.0340945870770505	0.00140330628215327	-0.0529251896702896	-0.0244613697008943	-0.00594210954497884	-0.0458074831878514	-0.0373933884959703	-0.03084740194494	-0.0219070758623579	-0.0470138091572833	-0.0220373115034029	-0.0438686426972344	0.00376970590330604	-0.0134018605829782	-0.0487848478123083	-0.0214099417142262	-0.0376054509560414	-0.0139042678120991	-0.0109809828292399	0.00751388159593175	-0.0174896391376627	-0.0174660552634456	-0.0346185672649052	0.294128080251521	0.125010181500576	0.0876354375580481	0.033313041438205	-0.0218472140939759	-0.0422824454339264	0.115579977351253	-0.0196763495590878	0.324534461046617	0.169953634020682
-0.0457030419217835	-0.0519519058340185	-0.0764329122811836	-0.0774493866962989	-0.0445708417618	-0.0696916047199915	-0.0589322796503945	-0.0486134887497932	-0.0171794656065625	-0.0534427829013776	-0.0599610200799325	-0.0276489320924906	-0.0412629170418499	-0.0444113403903528	-0.0158449133771598	-0.0386934116229778	-0.0363011777434602	-0.051848979330276	0.00172854804499327	0.0129836955342505	-0.0499864830046303	-0.0180811325476599	-0.0488224662915291	-0.0752001212136455	-0.068972533901101	-0.00404847128320848	-0.0700383484033646	0.0352978040968492	-0.0605312007433066	-0.0053542814567487	-0.0607996086716106	-0.0403913867047068	-0.0174347596260086	-0.0598946619797701	-0.0750121142034152	-0.0444830671681914	-0.0468046197382117	-0.0587936393526575	-0.0519762553691413	-0.0425967034711355	0.110545534097928	0.1286568308312	0.149226482141654	0.0613005061641151	-0.0476817333975885	0.0169994550012898	0.0656956017642103	-0.0245977284829963	0.222547530052008	0.510003685741049
-0.0435452732835583	-0.0262528839556051	-0.0443635159041892	-0.0563333448785803	-0.0250093098186953	-0.0657865529010502	-0.0736768730673499	-0.0259547726340151	-0.00672301444183997	-0.0546758755214093	-0.0592698384528966	-0.0295749573923208	-0.0312707381904403	-0.0209432803055673	-0.0493002140943479	-0.0371435753842501	-0.057203553150711	-0.0333308131609243	-0.0311606746972479	-0.0647277558211717	-0.0611788200252437	0.0129028338200807	-0.0290684048451741	-0.0823526006995941	-0.068432856608942	-0.0309581742951279	-0.0561518658681032	-0.0399913047428186	-0.0759516172867718	0.000834222570744058	-0.0408656691738581	-0.0422914498384315	-0.0109350585075845	-0.0682421303054241	-0.0285595488222075	-0.0735532960645312	-0.0527931691373004	-0.0367141460305205	-0.0427753524081178	-0.0294603384258301	0.204857553591318	0.261165689219868	0.100652958691689	0.092454450580307	-0.0511891826998605	-0.0329479985949093	0.284110011752834	0.00357711569635881	0.342861578990529	0.140991650994138
-0.0201754929841771	-0.0220887256434448	-0.0421115024828294	-0.060917812026175	0.0395070008513853	0.102144217950793	0.0939044795404602	-0.0162551782644395	-0.0300895995900193	0.0563975963731542	0.0765387600497384	-0.0498899714401847	0.480673493592742	0.0949931607421361	-0.0704074422538018	-0.0749591017943915	-0.0651136036283952	0.0312173578031495	0.00896465132606674	-0.0491320386471842	-0.0314147343738279	-0.00431373420656193	0.0128259159211716	0.369743314379189	0.387047775578503	-0.0691524027751329	0.0336604031410976	0.00317480793839709	0.474644231973379	-0.0275669040089534	-0.00378682237403473	0.179132813333022	-0.0204945087209817	0.209159443310776	0.0132270432864402	-0.00640885373649838	-0.0286717435875161	-0.000709186817681318	-0.0106571069131203	-0.0198284972567063	0.00542964130450509	0.0149580292288905	-0.0203283941315355	-0.0568205938771304	0.166857277841449	0.0526926859234759	-0.0290891742448114	0.0765186081235022	-0.0425342207754758	-0.0187101867821725
-0.030888619307225	-0.00420564529804756	-0.02323403293476	0.0022626717235373	-0.0305631128620614	-0.0324504335289558	-0.0664695906610701	-0.00830563267751266	-0.00813504369382505	-0.0617054765887192	-0.0321843382203624	-0.0358013890297858	0.0170593738333334	-0.00986448602497329	-0.0462325463414913	-0.0538900143767639	-0.0476148148211032	-0.0467388841138607	-0.012077955628765	-0.0572961448025599	-0.0361689269808648	-0.0276105930101468	-0.049003339420836	-0.0309448043889742	-0.0238147718384622	-0.0533145845604405	-0.0425603496303063	-0.00840087464140337	-0.0268816553384517	0.00967721700873992	-0.0218063028376741	-0.0510372583381411	-0.0409788701188007	-0.0115487878391927	-0.0318470102951567	-0.00903220249477257	0.0354514160820729	-0.00962457948254127	0.0100600801166543	-0.0217590713674421	0.411703578487193	0.0886530536710326	0.0505805181677895	-0.0391284437154545	-0.0252627330201964	-0.0590978172518292	0.0697812985270636	-0.0181522313164002	0.399594349144065	0.222514467931435
-0.0338295180887099	-0.0303864696736298	-0.0343680159402827	-0.0420609181362144	0.079292338724113	0.235423543878096	0.11467547098423	-0.0478126436087575	-0.053468320555784	0.094223274913866	0.249987438772056	-0.0173562638855724	0.190222372267562	0.0428124423216159	-0.057321452671008	-0.0490874185509977	-0.0310263786123254	0.0742673687973957	-0.0646947268590107	-0.0266600294613282	-0.00330711148363425	0.036813177904312	0.138237711464048	0.157003032650126	0.248074371243078	-0.0688141710491871	0.0839001396803906	-0.0361339883015531	0.148328187456114	0.00756542497139963	-0.0382436956325713	0.0349071181922238	-0.0544745960380816	0.462278670643608	-0.0231454303474196	-0.0234943255986769	-0.0468357899738563	0.0133801605275246	-0.0297535899106331	0.00955246601190188	-0.0590613071055795	-0.017994257996001	-0.0345837595164687	-0.0671263191830914	0.0496130960786459	0.2450960056241	-0.0222955136614948	0.0747408652157997	-0.082559131169459	-0.0644313379434916
-0.0153905691925786	-0.0269220902003009	-0.0259716615772089	-0.0363327382533337	0.0332241196782423	0.146209579217917	0.0934742561104144	-0.0429945817250266	-0.0519585797070841	0.0269471307828727	0.102401028855186	-0.025829772706075	0.312868608405445	0.0941391778063706	-0.0533952350188998	-0.0385728606841609	-0.0465962919245124	0.0450700715654329	-0.0251108614127632	-0.044125297298197	0.00220232181959173	0.0558496177721527	0.0630316389976292	0.343538262781877	0.392416417624063	-0.0730178909140492	0.0911942335988654	-0.0208080085121786	0.388283095387845	-0.0167452944441619	-0.0270962311488876	0.0662925384672777	-0.0223626924438116	0.33650348123089	-0.0521556055764222	0.000336493637854386	-0.0420705110135577	-0.00683770520812815	-0.0321005161415931	-0.0264479771432398	-0.060160809409979	-0.0356305460687168	-0.044505221122412	-0.0733242132207106	0.0887736381643623	0.0719715535824267	-0.0318907596595966	0.104172080509926	-0.0697748557054957	-0.0499961171027393
-0.0107648367295698	0.00195256704205108	0.0104941728384416	-0.00205042922162595	0.0399032615548916	0.182950241819715	0.0642592471954323	-0.0184231204057703	-0.0173107250395351	0.0257685688649062	0.0483058059524151	-0.00861624436317223	0.068217224105241	0.0487846643472228	-0.0370536963971754	-0.00659164887927899	0.00158892677217311	0.0575249140342734	-0.0255953731885745	-0.0240327978278664	0.0130738356704379	0.060551545418708	0.077437186026824	0.171410034009074	0.131858090111562	-0.0406629235246683	0.0749320750400271	-0.0170632631932849	0.137684721387587	-0.0156887208051283	-0.00602075802452899	0.0470698191698797	-0.0166746614270848	0.211666025749698	-0.0358180273417983	-0.0162895295269247	-0.0322436605092196	-0.016487244791323	-0.0181688337437822	-0.0166473824862526	-0.0257669232213319	-0.0157131584766927	-0.0378270684934904	-0.0204225826571777	0.0377436871559015	0.0729158462854028	-0.0311433019739524	0.0548583861490008	-0.0370635879660016	-0.0408358611217585
-0.0292095841940472	-0.0343307608107489	-0.0302306189454158	-0.0490289986111149	0.0602979943281077	0.233921826822444	0.204932068617497	-0.0359002529120675	-0.0352012675310475	0.0679575195961472	0.0688124805432096	-0.0229041173061241	0.320962802122799	0.0542413027422981	-0.0437276658982805	-0.0473136552442559	-0.0812303273583479	0.0325569052533358	-0.0133340047724656	-0.0260914972299774	-0.0161587906435431	0.0268912974442197	0.0974789206108269	0.457592141796866	0.383509261169382	-0.0800159697880098	0.126852041997149	0.0184395392822292	0.521783410123227	-0.0643229784261425	-0.0111224831362369	0.198606227569304	-0.00578897398932016	0.240427029017576	-0.0381742001150022	0.0028797113637543	-0.0186693503786269	-0.00126453105597885	-0.00132370557669757	-0.0189022062147566	-0.0855476726307161	-0.0476853143494385	-0.08875666141396	-0.104008861129613	0.177549891499358	0.0833846888411325	-0.0936393403150631	0.0881210182880967	-0.0864197651584836	-0.0956168179819863
-0.0329507109530401	-0.0139469023481849	-0.0245970713751028	-0.043757675651808	0.334279024164581	0.161019487565776	0.074268688973627	-0.0379950046308701	-0.0564697863960258	0.423587710140687	0.271632060843657	-0.0355179770158889	0.0732706043588644	0.397314437363412	-0.0246289486594234	-0.0664929007663905	-0.0208910461129504	0.437743944017886	-0.0479885838912698	-0.0178546230150525	-0.0230340243643124	0.242900017127158	0.423468525325987	0.0853724886508295	0.00253110773039066	-0.0855455313605748	0.430013905513936	-0.0410481032912339	0.140040867303822	-0.0316586045196298	-0.0258656111849503	0.179051695661532	-0.0451909137897481	0.0504089167276878	-0.0366768107190414	-0.0635427088791356	-0.0599944330711391	-0.00459702117382149	-0.0246302840860969	-0.0396396156614149	-0.0580468002610539	-0.0326707080064216	-0.0576942638198206	-0.0681373732554015	0.150779975858705	0.144187160755412	-0.0774519103481512	0.360409743479967	-0.0280997668939728	-0.0290388548631644
-0.0199524452463701	-0.0215277287554551	-0.0361321054751454	-0.0442483366034159	-0.0607643603276781	-0.0569088028490528	-0.0659635928974394	-0.0276402181208235	-0.0530415730168548	-0.0299597519571342	-0.00712174234757358	-0.0428924726566094	-0.0154016332501776	-0.0173066430063211	-0.0743805658725436	-0.0209035802264753	0.0134795589992796	-0.0104526794808049	0.0199000510459471	-0.0594927047581458	-0.0251015098313559	-0.0494793863031231	-0.068341763935487	-0.0353334951028296	-0.0285281538417356	-0.0760644737442013	-0.0660666729890132	-0.0207394154833857	0.0216637266215021	-0.0641385337231501	-0.0110168404200976	0.0353876091192192	-0.0543603555198608	-0.0500222151362197	-0.000895819595858591	-0.0364712123623	-0.0465462828927893	-0.0187712530378634	-0.0274902863739476	0.000390944776565143	-0.00559260213928179	-0.0525650330455761	-0.0825573234342581	-0.0381989899263149	0.0589837303900541	-0.0873062427872329	-0.079631560034248	-0.022299903793841	0.0571377411395275	0.00125048654978521
-0.0280717825656496	-0.0262175976019999	-0.0314501592546714	-0.0354590210461607	-0.0658034906842039	-0.042354555836902	-0.011383950382966	-0.0495038368377948	-0.0413659434878966	-0.0538284951908185	-0.0517201449951398	-0.0206581007492618	-0.0697024308898971	-0.066260896985289	-0.0284239241381618	0.00303020618132948	0.0159072929790976	-0.0546423010534707	0.00752355631551003	-0.0298594054476292	-0.0190104907136977	-0.0402234060221047	-0.0323225861331084	-0.0071430569103787	-0.00592479226618107	-0.0516785080434596	-0.0503219666788288	-0.0280248180686245	-0.0338941410194703	-0.0522007585228112	-0.0397346386349766	-0.0479406196598316	-0.0724944552610975	-0.0396828258377183	-0.0416482000085139	-0.0444327011191828	-0.0498168445826656	-0.0329885538125084	-0.0419128172443153	-0.012913528907307	-0.0297430224246539	-0.0526455626917401	-0.0483772582847719	-0.0173960175748673	-0.0188621224600137	-0.0443102971514332	-0.0558143483477754	-0.0575542002600588	0.0278608657196875	0.00447942018918526
-0.0159736158532296	-0.028644859574977	-0.0588585925001045	-0.0588853847736515	-0.0733471618618311	-0.057033930354385	-0.0619280198827732	-0.0239295800766088	-0.0618118874180718	-0.0191184067615942	-0.0149189985341451	-0.0561094666948652	-0.0126748125655145	-0.0291646654929586	-0.049941402893319	-0.0290813669237678	-0.0359116699119129	-0.0150584232943243	-0.0100805093281723	-0.0360460512461327	-0.0213799257313009	-0.0657490923578187	-0.0851086600247823	-0.0803645372420733	-0.0699984434397075	-0.0672598373374685	-0.0785247103834844	-0.0308791829597767	-0.00592191445215265	-0.0871431812293997	-0.0189615220298026	0.0374552543803142	-0.0408948045349631	-0.0619034548307383	0.00772828845810495	-0.039258670679364	-0.042486833124581	-0.0233782557418937	-0.0239201793231944	-0.0120960840187587	0.0169512567398907	-0.0395350472189336	-0.0740185434810925	-0.0770402196683486	0.0581474156630533	-0.0887125880725328	-0.0887206327988798	-0.0341046677740115	0.0357360691650197	-0.0316404437393646
-0.0792919098421517	-0.0811881359263297	-0.0770385810047778	-0.0479620109555348	-0.117093707557185	-0.0629082158105318	-0.0365280235621767	-0.0569770269896507	-0.0568303900205936	-0.0973016441231845	-0.0586923051002788	-0.0562207476073024	-0.0735866600863785	-0.0996548150326456	-0.0449956920321948	-0.0339404897353551	-0.0595190890154381	-0.0902219152463732	-0.0781648777330502	-0.0218274803305036	-0.0472842091229942	-0.0850488287217561	-0.0860187573795169	-0.0760850091869919	-0.0679582809811942	-0.0585707899623551	-0.102262294786511	-0.0589611721257374	-0.0437172307272367	-0.0809377814593872	-0.0729581038175158	-0.00809814242660275	-0.0496455009470209	-0.104161920211377	-0.0162471995503652	-0.0807999444440752	-0.00734813934761942	-0.0612320761609828	-0.0206584353742352	-0.0210360091425204	0.0293933746611179	-0.0286219574366525	-0.0401115387107479	-0.0127901251812731	0.00270488520037423	-0.0616008730570524	-0.0615988196546513	-0.0955651099646653	0.00975257956101066	-0.00767352863502622
-0.00609717812156778	-0.0230880172561605	-0.051261371579423	-0.0499821321466495	-0.0712359153489636	-0.0626554714116868	-0.0798420621790454	-0.0152266120303094	-0.0694372416695901	-0.0253738452077276	0.00215943441792869	-0.05836911857958	-0.0145917006590406	-0.0327179253475265	-0.0441503243036891	-0.0204565819420523	-0.0359593462948344	-0.00754197542575956	-0.0133701631915536	-0.0291695137500117	-0.0172927209726592	-0.0643687133917813	-0.0915705751141761	-0.0531305738191596	-0.0491613601927003	-0.0569403783675966	-0.0799226983900149	-0.0358548345984764	0.012875264339905	-0.0744460117045545	-0.0138915727000335	0.037460940933306	-0.0514289430380517	-0.0661080590562884	0.0247915772797156	-0.0361532132443071	-0.0377542462303124	-0.0316644089875145	-0.0228685029626836	-0.0164779314325024	0.0168697269373039	-0.0654113042920031	-0.08045814487295	-0.0845736311713232	0.0439669819494946	-0.0883216806630114	-0.100686846007543	-0.0308346693340413	0.0227401285137103	-0.0193267262834311
-0.0325354448225814	-0.0432460212839321	-0.0680050131321459	-0.0688003085874394	-0.0714247204439291	-0.0619224457236763	-0.0533677337465456	-0.0320180942386733	-0.0712884173356689	-0.0108221451333474	-0.00977714226917779	-0.0433620637033535	-0.0268427804543106	-0.0264333716198633	-0.0294903557703781	-0.0227821036973736	-0.046346647246865	-0.00811974282381312	0.00811911446180822	-0.0208967288573616	-0.0355719398940649	-0.0555003831245292	-0.070427009572052	-0.0630556390852821	-0.0554727900466844	-0.0609651550476901	-0.077463156926821	-0.0172400719543159	0.004488153226085	-0.0957653154762993	-0.0292438178121702	0.0387401883034618	-0.0685633881730088	-0.0829207634448047	-0.00301286157269775	-0.0338791801118839	-0.0255648793137924	-0.0371503498557998	-0.02865539008714	-0.0287959299320142	0.00369620990280754	-0.0621668158012913	-0.056131187068014	-0.0503175088823604	0.0647015451879364	-0.0657569054406824	-0.0733700218232149	-0.0270347702922482	0.0550563376613689	0.000271387256658482
-0.0544044760960016	-0.0499188005390465	-0.0510498715043249	-0.0363950859533269	-0.099072911486757	-0.0597578851750111	-0.0641402095275989	-0.0652758452049535	-0.0584391615692322	-0.0828255860013521	-0.0797432556391876	-0.0412800710966091	-0.0800965154129871	-0.0934404262448747	-0.0602854004147352	-0.0298683843511757	0.012711683625505	-0.0719532666527862	-0.0832146924563503	-0.0539080622580485	-0.0419386752825882	-0.0705221438419986	-0.0674857135383808	-0.080451966938722	-0.0319160258719902	-0.0448554796140902	-0.0601974978457783	-0.0490139927660206	-0.0782766917292333	-0.0460430029384729	-0.0797068342577438	-0.0842391514545677	-0.0520620254470883	-0.074592985232942	-0.0148113475606321	-0.0688106982140825	-0.0302252413102351	-0.0355629412302228	-0.0263105573438867	-0.0467550860910303	-0.00851520767614468	-0.0259261566254668	-0.0504616462618972	-0.0612638580415073	-0.0920522029974742	-0.0763903710448746	-0.051673256275216	-0.0868525005210428	-0.0419670136821375	-0.00812192362445948
-0.0127929029776413	-0.0354861592710587	-0.0456745612741149	-0.0613278751204272	-0.0748879919868797	-0.0596265782279344	0.0674800555525812	-0.0616689476666526	-0.0566695720103393	-0.0550737469765931	-0.0484406607371184	-0.0195961930499522	-0.0790988882934128	-0.0683123361047931	0.00922238664036695	-0.00239574028621168	0.0221106070087024	-0.0478592189496272	0.00320614927488928	-0.0131198845782559	-0.0107677815162569	-0.0580638744400873	-0.0565699567455805	-0.0391206714372959	-0.0394842115885535	-0.0570875557793111	-0.0507649381378846	-0.036495312618445	-0.0504783196989741	-0.0672641571863681	-0.0562178417305141	0.022859380242457	-0.0470223928926288	-0.0465563296875589	-0.0703798980153962	-0.0409231254922027	-0.056928499437567	-0.0175889115730646	-0.0352080682357787	-0.00928036806697364	-0.0486479788009744	-0.0694104512604512	-0.0827802903716695	-0.0750207452664768	0.0829860352661126	-0.047095782116932	-0.101296154249325	-0.0689113098928364	-0.0257741280366183	-0.0666647368025432
-0.0431284736849628	-0.072943212520522	-0.0662134753497983	-0.0440719356318554	-0.0892562283634474	-0.0561139874212112	-0.00948531248684891	-0.0746267838368665	-0.0533644916290942	-0.0575178930561846	-0.0744954549106542	-0.0356701958086244	-0.0802439076687715	-0.0818811219091528	-0.0217465819148064	-0.00291423086032086	-0.0360846180258798	-0.0536081253233338	-0.0494329664814605	0.002112950252536	-0.0122670762358276	-0.0704813646010268	-0.076905070010999	-0.074630628394949	-0.0531732961820567	-0.0372075236908496	-0.0451178541637773	-0.0508671235053899	-0.0779661718049352	-0.0646568062536591	-0.0757509495479362	-0.00880389793532422	-0.0462766424885329	-0.068685766851365	-0.0462282643490062	-0.0676842085564969	-0.0178275512470783	-0.0287930461107464	-0.0193351765875127	-0.0371377769870619	0.00321516920549746	-0.0532831289322633	-0.0634698881327193	-0.0696771512201001	-0.0133634261380046	-0.0687233331575291	-0.0680544774075777	-0.0754442356760267	-0.0428076261621559	-0.0616084557435557
-0.0388881690846739	-0.015520413276743	-0.00515386333286529	-0.0178189355478145	0.00163407517589115	-0.0113073215760134	-0.0150363297593766	-0.0167902322774848	0.0489034960949523	-0.0421171041361359	-0.0629212955194818	-0.0306975843088223	-0.00724786472931109	-0.00947963266318405	-0.0206176817184735	-0.0263877275501037	-0.025779737420764	-0.0284319278818111	0.0412511047683439	-0.041239281741503	-0.0329142504036952	-0.0180041548292461	-0.0225945987689891	-0.0220247222031516	-0.0274164345875301	0.00682547816915165	-0.0155891847665903	-0.0102188882231048	-0.04222997595902	0.0508937363305013	-0.0352999271822082	-0.0287027182543732	0.0230599475424848	-0.00863892680895585	-0.0462732201959485	0.0132698118373499	0.0240073490859005	-0.0101046488061086	-0.00762052624020868	-0.01061252056446	0.164469988268241	0.0416999773906943	0.108245081233525	0.0329999141269676	0.022125217948913	-0.0298553918367134	0.0944072057741774	-0.0174779858066246	0.114863407030228	0.153272080978283
-0.0514115862699373	-0.0074846245157723	-0.000255475475226331	-0.0238558242960967	0.509429998482666	0.119226272456752	0.140542687425807	-0.0314322312262627	-0.0370042867365486	0.402562212050845	0.0485783917836442	-0.0362564756449323	0.0462695014512537	0.282532692025585	-0.029141772671182	-0.0621335079709337	-0.0239301166681523	0.2911165462645	-0.0460561107851746	-0.0503748292009921	-0.0477974671144006	0.354817245956348	0.423251067580825	0.0598398366697836	0.0330095907981069	-0.0305926984772595	0.317597474517667	-0.0429487514779965	0.0639901892990689	0.0374542215841259	-0.038601831903383	0.0619946965666999	-0.0367394821872846	0.076670975310446	-0.0659916590350158	-0.0458221068325742	-0.0611965256199532	-0.0398929673590052	-0.0603823298441831	-0.05038348469534	-0.0742229718756009	0.000431925195379252	0.0665271248434292	-0.0309600235741857	0.0290138142645425	0.127587585212683	0.0281868149031362	0.317187990881507	-0.0611459530820005	-0.0196629374215632
-0.0341733098826207	-0.0439194361141375	-0.0760928794370907	-0.0752081646508014	0.0629899104487073	0.0586013786164169	0.290861643438755	-0.0366624638545276	-0.0323639107171904	0.127141374803075	0.135983713689494	-0.0496154138183531	0.227877711587118	0.114298491577092	-0.0421815701568646	-0.0660311839980986	-0.0740465397889457	0.107873732886419	0.0613898345316527	-0.0477268340283665	-0.0586545190309013	-0.00171715661755019	0.100710324885287	0.132200967538192	0.132683184609165	-0.0838670909688762	0.0213309146312491	0.0353663703413123	0.251053178773517	-0.0542585416296161	-0.0185402550393302	0.655858351648194	-0.00499659037601068	0.0711287689504511	-0.0213044500841754	-0.0340379681668349	-0.0467868721287275	0.00418423409575254	-0.01108487777312	-0.00836366563457762	-0.00935921315243665	-0.00338500410361164	-0.0738102703105917	-0.0906222907735899	0.589813016489496	0.0929627798036357	-0.0485279208379029	0.144425931919256	0.0161186534114901	-0.0179539133633841
-0.0394804655308448	-0.00575177862055768	-0.00531034391535341	-0.00502186534928873	0.0755462671222302	-0.0400936885465964	0.0119318965498484	-0.0290328674419357	0.0167689271997246	-0.0187111953984366	-0.0367451068290631	-0.0424134271491928	-0.0102024705095224	0.0654137890948612	-0.0569565604535011	-0.046146345739843	-0.0503680642802218	0.0174205456483246	-0.0310949579321694	-0.0493067941004596	-0.0192529527146835	0.066184589059283	-0.00154438920172942	-0.0311461297205549	-0.0516473391503099	-0.0142704435805728	-0.0270077701418622	-0.0391171646740023	-0.0452603613845577	0.0260206835666228	-0.0438914251046285	-0.0467627723847	-0.0659335491004282	0.00843366902073654	-0.0197217480466914	-0.0274552043376254	-0.0173245524507123	-0.0446377655899541	-0.00190878751763415	-0.0228038929847253	0.0189190613462453	0.0734312107014161	0.128746556306277	0.366162087750612	-0.0112387672145117	0.0031499867922949	0.0868832786757317	0.0183760397535642	0.0110528395011056	0.0364407405626132
-0.0154309056017673	-0.0435289809209833	-0.0307960253148048	-0.035315736347842	0.0602738620103798	-0.0611365403031469	0.0265711406692276	-0.0432473350587358	0.0735763371216383	-0.0335585539380062	-0.0758708857382909	-0.0131910082496016	-0.038328811380873	0.0295015238388969	0.0181564142219021	-0.00339485150241794	-0.0450423646167979	-0.0157351590783997	0.036758577057915	-0.00801541133293276	-0.0356993291282754	0.0440199688082647	0.0120861002785993	-0.0533576662977669	-0.0568979690056136	-0.00119270605920781	-0.036341432646123	-0.0140773160700382	-0.0685801477896126	0.0332960171850116	-0.0687526292224307	-0.0268843346906335	-0.00422675344245787	-0.0189788032838674	-0.0678233374577076	-0.0285679302768708	-0.0283383031170845	-0.0343973635040823	-0.0542274436371447	-0.0428338979861532	0.0540894615357744	0.128722013076646	0.213121633693366	0.444230002440003	0.0191519823525947	0.0119404090808273	0.18764601258086	0.00186418930433036	0.0506751191063864	0.0948090685691389
-0.0338311953735147	-0.0288413764210835	-0.0388089264127556	-0.044175592483086	-0.00357012012819212	-0.0406895034056661	-0.0679663180344382	-0.0344731156400297	-0.0155454511668276	-0.0528121823567534	-0.051211814191225	-0.0373030129778741	-0.00525794948544986	-0.0113588361196926	-0.0751818255183905	-0.0377710954036581	-0.0273448584880061	-0.0422712378980542	-0.0492840420280966	-0.0626780725043646	-0.0413014186090294	-0.0011287538188684	-0.0505964643782498	-0.0496063528965043	-0.0462335778568976	-0.0322839350400915	-0.050909837944947	-0.0157206695188797	-0.0452081297288056	0.00882364928499109	-0.032211671181097	-0.0404558312165275	-0.0557541125801863	-0.0333490321175789	-0.031783268624574	-0.0483040435867149	-0.0162484405582337	-0.0386503148526362	-0.025078400418239	-0.00781490503747442	0.219228819370618	0.163455252457813	0.058148358095031	0.025421807879875	-0.0505101612685341	-0.0622444697854622	0.140016893295617	-0.00599463037465569	0.465318114574652	0.251755532997701
0.0140268609251533	-0.0330508511558102	-0.0293360012944222	-0.0301571669541594	-6.99830698450855e-05	-0.0554114630275287	-0.0120492516357834	-0.024773613528522	-0.0190300192654803	-0.0238854487267556	-0.050913287364292	-0.00700131720228952	0.00409929711470574	-0.012838031364889	0.049734766043833	-0.00935330876702238	-0.0314754575227865	-0.0340080848794331	-0.00278533495164458	0.0193877226224529	-0.0232449749379252	-0.0250741155796717	-0.0420923741207853	-0.0623653159543048	-0.0580257132369394	0.0136365457299907	-0.0468100394709256	0.0180750219494748	-0.0715080762478557	0.0670214070617764	-0.0451129461878437	-0.0311913466848533	0.00208869344564873	-0.0444800459870661	-0.0573510960358778	-0.0316301603557275	-0.0287794797211504	-0.011908337787463	-0.0157606202762039	-0.0193694718630948	0.0222980857819201	0.0762823497655804	0.156867488742649	0.0855421657452664	-0.035142358401318	-0.0168679401521088	0.063512108915844	-0.000952961181277415	0.037423601433648	0.094929383783412
-0.023640540163605	-0.0155534977583369	-0.0198721770331893	-0.0121399268389949	-0.00451280886349039	-0.0239184154404049	-0.0153352441473654	-0.0257380711452405	0.00852508162338961	-0.0360032183585869	-0.0400547088843175	-0.0260412107340582	-0.017133354565891	-0.0340268912937876	-0.0394806131141948	-0.0388012395031215	-0.0347815547048893	-0.00883892568683859	-0.0388099203452737	-0.0279861343108923	-0.0309799171866172	-0.012716646414259	-0.0317054899051597	-0.0361916808787786	-0.0354507018040788	-0.0331086101299393	-0.0533626706782701	-0.0197506005714603	-0.0623527369094363	0.0263163856360176	-0.0403700090819936	-0.0697571658947136	-0.0229616045867556	-0.00761429235303258	-0.00211674117212123	-0.0384351869219889	-0.0239830798238067	-0.0340794558845218	0.0164899504422975	-0.0233415281354107	0.0264917282601281	0.182025926037144	0.0695479467515359	0.440125332884309	-0.0213162569541511	0.0245250181540605	0.0778806949077821	-0.0488056786834648	0.0363628297553833	0.0374881019900078
-0.0180887195891802	-0.0505667965078527	-0.0339121307276532	-0.000266336943066683	0.0112150801323347	-0.0148896162807394	-0.0199937555589381	-0.0464564071124741	-0.0100532080568043	-0.0177951703701182	-0.0479664937647017	-0.027952499507669	0.00530668910266236	-0.0114918167247736	0.0037050109317534	-0.0154581599332457	-0.0441153192729397	-0.0147504164695473	0.00647152439508286	-0.024686560329479	-0.0553989893676968	-0.00157826618439367	-0.0225114861269858	-0.0540248270315918	-0.024860376486058	0.00439191747144884	-0.0434294637191288	-0.00620288341289097	-0.079162550201443	0.00374482572683988	-0.0580713521331584	-0.0601285070304685	-0.00645034414367199	-0.0113501415943276	-0.0679726781331563	-0.0344249153200665	-0.0241888998564094	-0.0212981221884823	0.00616336631434937	-0.0228912162762277	0.0222340588742866	0.142085163426984	0.142220316695155	0.0948325310062519	-0.0292042415390625	0.0314153486573832	0.115262316239308	-0.0271033410532655	0.0319945066857822	0.0132209976211635
-0.0405440371013346	-0.0257614538018073	-0.043313474966084	-0.0589058655790136	-0.0144778335346994	-0.0397339711467802	-0.0728824593814143	-0.0167021567712325	-0.0106540936648744	-0.0376541079190711	-0.0585500541803595	-0.041811207925148	-0.0221628939495337	-0.00196412336874099	-0.0414581357208129	-0.0514157233945075	-0.0318673643954217	-0.0315304814808872	-0.0279181438830911	-0.041925645397877	-0.0564839569211437	0.0189670426916366	-0.0455082526238239	-0.073482915265917	-0.0379037604041419	-0.0236027581840861	-0.0150281138621123	-0.0129211463534412	-0.0333765489453099	0.0061930850291284	-0.0407726467049203	-0.0149739076376851	-0.0294490266375955	-0.0388039321781723	-0.0331389771776331	-0.0548078622384403	-0.0442282031356173	-0.0531617660741782	-0.0348156418084098	-0.025497218558965	0.125915605476189	0.0859055950289536	0.102451259280358	0.0223532452151886	-0.0375628405636526	-0.0448552743460142	0.0864271486783645	0.0107404091120649	0.221800528764223	0.51173098803573
0.00191756744013798	-0.0411726736227678	-0.0249997183284306	-0.0170292956079375	-0.00660111660064502	-0.0555405249973219	-0.0179841576796493	-0.0593024782394576	0.000907745576414546	-0.0284365635803227	-0.0895392261124687	-0.011073561925766	-0.0318163619883688	-0.0182601697534529	0.0107536556480816	0.00107806113270307	-0.0194796171163164	-0.0359139180010405	0.0543144740710668	-0.0100845681260477	-0.0361439343269582	-0.0282006194606471	-0.0484225128355384	-0.05620006672541	-0.0308005724469406	0.0138136159208815	-0.0495561786018332	-0.00227564192436925	-0.0811055613036623	0.0171375564400005	-0.0445307482107316	-0.0824755162520444	0.0192085050595859	-0.0144105758540283	-0.084088717908813	0.00666562257475606	-0.0341586054532428	-0.0422896989452456	-0.0371727153252061	-0.0513095537235877	0.0607869857622162	0.143557995246951	0.21114699088144	0.151341053011919	-0.037502679015383	0.000825300292586028	0.145002950904118	-0.0389314946729744	0.0223049252472795	0.0568375730982722
-0.0342667366115595	-0.00804466488991156	-0.0253831629308543	-0.0206107089043094	-0.024849990141113	-0.0254125233954554	-0.0486868401328358	-0.0258363315193129	-0.00934899187031851	-0.0337714058067385	-0.028088180613522	-0.0235269912780234	-0.0437676762578973	-0.0145208616913862	-0.0433980789081888	-0.0336226678566564	-0.0165902747079446	-0.00690208794290004	-0.0493584085723446	-0.0420503518831115	-0.0403948556745877	0.0143649091106817	-0.00357478374162845	-0.0606402261355326	-0.0452119409611782	-0.0419981580488404	-0.0123780590867456	-0.0364416214982647	-0.0646807069066695	-0.0300376445452687	-0.0109397581807416	-0.026945341351861	-0.0129476655767844	-0.0525384280159983	-0.00296536413559346	-0.0701691130464891	-0.0454639996907111	-0.052571556106131	-0.0638640225459513	-0.0451337202061907	0.154465112209986	0.239797378095073	0.0587756404771728	0.113544627485145	-0.0721948726458527	-0.00901465544065249	0.203051354519849	0.00984893918527065	0.456062225268274	0.186162105642278
-0.070961102581122	-0.074912806043245	-0.0959735873780636	-0.0980415942160895	0.172911583121206	0.104872126440569	0.185850431996402	-0.0803529051265452	-0.0423619863197694	0.287861082607612	0.436280108584595	-0.0178035789451048	0.056079410654336	0.143292808728452	-0.0191025294742561	-0.0552621033927321	-0.0561925877513397	0.149692076422525	0.00587700287954092	0.000193850842540759	-0.0716394212103917	0.125655834243654	0.229163183516622	0.0434275517571824	0.0410390902192536	-0.0473128555445362	0.172025306757947	0.0199430240743509	0.102711275379827	-0.0741184420568133	-0.0653210502221344	0.263407069013701	-0.0284574874903605	0.141693694208371	-0.000223459627379463	-0.0487043254169683	-0.0415458070657152	-0.00262437472426852	-0.026143318743524	-0.0472893181382819	-0.0578648456140059	0.0132004942054486	-0.0328499749714645	-0.0178741446498805	0.237963662374792	0.423412982307198	-0.0241714461434329	0.184333722216468	-0.0190472274513261	0.00292206340448162
-0.0444680116385688	-0.0325123518519062	-0.0285186534207124	-0.0474593469438185	0.040655644365987	0.17653874727006	0.187834535600288	-0.0432604337807234	-0.0127271026731086	0.0209378479188739	0.0456093303621822	-0.0191064379882259	0.376581499003633	0.0715710586641158	-0.0224678558197255	-0.0463260156024924	-0.0696935184570191	-0.0127444096310137	-0.0303373294589318	-0.0194220508739097	-0.0209542701254182	0.0267002140221807	0.00784617677252405	0.397302610455966	0.296684641837583	-0.0436012697796489	0.0539340719045429	-0.0178890129868589	0.296632054048932	-0.0102901292930278	-0.0345014908258379	0.113777134907362	-0.00633244049842934	0.185168943308303	-0.0452471315650375	-0.0136177132743911	-0.0398037381279066	-0.022172845280052	-0.0256964070602497	-0.030899234693768	-0.0478302950594241	0.0274162324098329	0.0120491993944418	-0.046131493350751	0.081585319783835	0.102233860897539	-0.0109250718483942	0.0410795749182009	-0.0839973091063462	-0.0325080452533297
-0.058079105301887	-0.0151891987508093	-0.0190807677229629	-0.0552171898852301	0.31816499304481	0.156405474219181	0.076190338196183	-0.0297295538454971	-0.0507019122136843	0.351380650403887	0.0874183997220892	-0.0641287912247594	0.0554795585356655	0.340083007377572	-0.0878936306266468	-0.0640453390027484	-0.0339885452659863	0.326332298865319	-0.0822053321314013	-0.0564299390229281	-0.0391696800872346	0.294432631321553	0.438746212814119	0.12477624190067	0.0835849710944491	-0.0419805298547491	0.457765048723676	-0.0442795905895301	0.126396437912387	0.0434581502303655	-0.0124270115978275	0.0624727842276736	-0.0167054382396727	0.151348286509712	-0.0572621880868626	-0.0425108700176161	-0.0639668401551405	-0.0241026573470034	-0.0599116403273841	-0.0345073500211171	-0.06536951487767	-0.000373777107369464	0.00859625948307207	-0.0689140788649377	0.0429348014743171	0.0975184192067131	-0.0118687354436885	0.303346690853667	-0.0564137107101985	-0.0030111749689086
-0.0620610899787808	-0.00874062307502348	-0.037255351177633	-0.0606934743120971	0.52870910297362	0.0828080264928429	0.159292842477903	-0.0248594011490695	-0.0468774096807598	0.476517481241562	0.164087617022382	-0.0398723802309548	0.0967914149951602	0.365045011367991	-0.0542987882502631	-0.0721256275166414	-0.0408493844301795	0.330842027136394	-0.00816613929200907	-0.0674280082023693	-0.0695124765231124	0.273744998027077	0.398564623122172	-0.00257234983102573	-0.0163188806917505	-0.0457612242786921	0.235128602784963	-0.0197145970765861	0.0294543661350581	0.0151871378851365	-0.0188406264525017	0.197095296548035	-0.0455258238926663	0.0596873606514665	-0.0396452962725837	-0.0130177520081396	-0.0463732812440321	-0.0220278305648438	-0.047897521958131	-0.0430524208286866	-0.0710556750668221	0.0245723724361449	0.0324807292384719	-0.0307629360743103	0.148365583849907	0.184127182292681	0.0326530528623034	0.334054859649652	-0.0316482437353028	0.0243035704283713
-0.020741430043029	-0.00477296255050826	0.0175640934280051	-0.0145358329850191	0.0300943142804942	-0.0765858485026428	-0.0594437760705241	-0.00298475618442646	0.0728514739667727	-0.0450244622869184	-0.0913830281469457	-0.034408434339854	-0.0232440833479185	0.0200002954934982	-0.0258196516672933	-0.0306661953100387	-0.0233017917084465	-0.0321023627499212	-0.0189083358000557	-0.0530412638921691	-0.0191854946905109	0.0104549727412262	-0.0371160432243618	-0.057003363913744	-0.0550902150753478	0.00488672154458573	-0.0495766219981292	-0.0529792381199316	-0.0995754543658402	0.0767239673823012	-0.0529879980999292	-0.0933765091014645	0.00688203523698813	-0.0188175358181866	-0.0244449665646385	-0.0498818944182735	-0.0132937039798977	-0.0464478170222734	-0.0231363121065928	-0.00906724011954086	0.102990757738305	0.104958341945298	0.389314227598835	0.114375383022124	-0.0828408607447453	-0.0484977680672928	0.155007062655687	-0.00885750123596077	0.075527210664796	0.141077424370932
-0.0229080444181807	-0.0578835055260867	-0.0725597830427132	-0.0862038530398201	0.0369240341369311	0.065831526056783	0.0910795002702441	-0.0612853903173845	-0.0330463997327574	0.022237694100514	0.0907900155505142	-0.037025154440654	0.248786038273609	0.0769572819619204	-0.0410875058784277	-0.066478897946558	-0.072968950459515	0.0575131378355243	0.0335487836852252	-0.0518092990001393	-0.0561455862310768	0.0107846278627978	0.00782992463382013	0.289599031800009	0.266401458801616	-0.0659776716998725	0.0107882143263749	0.00883249462488102	0.353442169378676	-0.0393621612459154	-0.0504828430339917	0.196376812450496	-0.0158410753182683	0.257358551012051	-0.0317511702774858	-0.00437960209724275	-0.0274170853500582	-0.0443812965091568	-0.0276527868461498	-0.0373562549639914	-0.0125986940722232	0.00534380322165017	-0.0233833266682284	-0.0560390873914434	0.204284912052305	0.0875885468369118	-0.0147411255746394	0.0927266370209297	-0.0560657387158061	-0.0268479576881894
0.00819548455659758	0.0167517375627354	0.0230593291697727	0.0210667051820425	-0.0123863424250648	-0.0502102846421213	-0.0299053329308448	0.0170762898979118	0.0705667754638758	-0.0571488074874766	-0.0492213300282142	-0.0209045036721405	-0.050194875360419	-0.0186222655516287	0.0216094077982908	-0.0341335860967416	-0.0180126208208586	-0.0476381553766098	-0.00726584725578732	-0.0162749853934263	-0.00924071061958211	-0.0297269771126341	-0.0311327027750682	-0.0453233200121646	-0.0505371502076361	-0.0185041096532536	-0.0428956661502033	-0.0186333501589601	-0.078329156268782	0.013285400013427	-0.0310428016224117	-0.0700832410786165	-0.00598135657269976	-0.0363098600980929	-0.0123052443043399	-0.0102310199461453	0.0384495160955032	0.0198655993456327	0.0258427468676089	-0.0138055544455098	0.135242116557248	0.0910500505774417	0.353046572531529	0.115811507149128	-0.0470790752046047	-0.0121889328634451	0.0882089527884874	-0.0274802415441956	0.086753505880671	0.103482365769134
-0.0408835886153243	-0.0554824728913898	-0.0505269549757341	-0.0718897332986689	0.0520814031644894	0.163467238272359	0.196344521587854	-0.0689412811445774	-0.0123940228593599	0.0287432010345047	0.0479599822696369	-0.0250511726110323	0.236503342351869	0.0822146688070458	-0.0408681165861272	-0.0467149480925856	-0.0692185346134472	0.0234242659543759	-0.0034364643216672	-0.0272313421367209	-0.0247697208075658	0.0195476496289504	0.0471262140480947	0.511398886804162	0.386179934935204	-0.0700606591547016	0.0592314623923115	-0.0107204224084668	0.370123783557669	-0.0310815755081703	-0.0283878023157041	0.18136875200439	-0.0266774326823627	0.279774379096818	-0.0690712884698677	-0.0047556299643303	-0.0283237337058342	-0.0207265922797904	-0.0267148579116125	-0.0367699302593624	-0.0612293659160534	-0.0358553009792036	-0.0257683702990999	-0.071179907082038	0.157185961125685	0.0828713882687554	-0.032941163972866	0.0837988020260873	-0.0936489462256164	-0.086770856643796
-0.00842941509895823	-0.0535900296651032	-0.0442951829595558	-0.00487452830951423	-0.0296522583743161	-0.0344435466628359	-0.0316318776274459	-0.0432584046517626	0.00376374761526704	-0.0367750857030025	-0.0248353659227092	-0.00634281885113201	-0.033075933954812	-0.059280006352774	0.0162618624182471	-0.00655453927818143	-0.0300653559949753	-0.0331068036071087	0.0610298112758515	-0.010853417725926	-0.0476435571812003	-0.0335370665442288	-0.0307281472499968	-0.0421424338173215	-0.0204101215373718	-0.00533028990562934	-0.0725767921762716	0.0458288188168346	-0.0948120605144415	-0.018500820185295	-0.0648042192278886	-0.0288681297776128	0.012808047483338	-0.0518854213827004	-0.0506824075589965	-0.0334506711105283	-0.0246876270211692	-0.0292822665581914	-0.00535030194323351	-0.0158082167620725	0.0500392588382852	0.136764882537977	0.0638069002266955	0.0999162174656775	-0.00844094942971103	0.0206107382488772	0.051429598838721	-0.0674404443664211	0.00484179197270938	0.0714789345761557
0.0503076840080488	-0.0155281175451418	-0.00695921924686897	0.0130222822245898	0.0280798464469067	-0.031679912949689	-0.0186767305684667	-0.0208751336363157	0.0150842931635011	0.00580388147118437	-0.023644322719295	0.0214965810231553	-0.0288815359582275	-0.018335081921761	-0.031931421165674	0.0215265032361234	0.0130885817018775	0.00966761972672402	-0.0115459096876576	-0.0146301496811574	0.0259874172331246	0.00037841526282071	0.000356636958899706	-0.00380543955194515	0.00559366058475866	-0.0154550987247584	-0.00697542127628688	-0.0270162343804223	-0.0272157706579473	0.0236867069979912	-0.00773083995586108	-0.0302415133948255	0.0233916209053973	-0.0243291273535166	-0.00933779110124337	-0.0062435755573241	0.00174277811554444	0.0107149991577142	0.00751397383120675	-0.0122892082883062	0.0552268624950061	0.130308837579408	0.0673641821748452	0.10821175976118	-0.0327440652636368	0.00865321915015556	0.0749354561475416	-0.0216473911207171	0.0368166187324407	0.0282338682913124
0.0200771883485601	-0.00711603305875065	0.00507007950205006	0.0080694847413183	0.0137605287383615	-0.0243974792146337	-0.0423840909428551	-0.0196812151040017	0.0101385310748113	-0.0320362525253856	-0.0418871930131082	0.00572033650972065	-0.0032890258166991	-0.00142330789285209	-0.035938580202937	0.000135881080611026	-0.0111174361024087	-0.0109316020826775	-0.00880776035917531	-0.04364487318009	0.00336629983881959	-0.000905960913742975	0.00460111463256836	0.00137037694712126	0.0163657529656535	-0.0104751843507615	-0.0107981247828896	-0.0269068931695343	-0.0367844700838962	0.0401073798908558	0.0198025332821126	-0.0378371627895915	-0.0168943104536633	-0.0101892907966182	-0.0360521536195507	0.00552743752148734	-0.00851904273965111	-0.0055564561170779	-0.00484484120328577	-0.0169555274026789	0.0557440453717385	0.0979910285874537	0.129393764522727	0.0207421953847325	-0.0531074195925119	-0.0307975544749135	0.139472649923542	-0.00675790789826823	0.0923253821479201	0.0301073297392456
0.00927438068701667	-0.0306345931159086	-0.015471889131042	-0.00745825542760709	-0.0565048669518856	-0.0458032901330658	-0.0661419746868245	-0.0253339761979901	0.0401310459254321	-0.0627524129175179	-0.0688444930480025	-0.00732629921000318	-0.0386168784952833	-0.0223188169143461	-0.0378026405694727	-0.0126259488764997	-0.0322474229559584	-0.0288619714054289	0.012649690015225	-0.00345267200038485	0.0139922321964655	-0.0395170686863115	-0.0183332050604309	-0.0276545982914884	-0.0166219775832069	-0.00236640226757811	-0.0199261582950706	-0.00260622704381156	-0.0295508730393741	0.0061569744789336	-0.0164598122609465	-0.0726395688652831	0.031510812666011	-0.0249748540431832	-0.00811426814922884	-0.0118076191502983	0.00428482158665128	-0.0193006593124881	-0.00984146922693608	-0.0275573780658318	0.180408809214493	0.0660414814758426	0.101131247222133	0.121225513455024	-0.0743250309420719	-0.0244502445101753	0.062401803068269	-0.0410055989809409	0.064681740586782	0.14199889171286
-0.0426117752213164	-0.0287350012981046	-0.025755367451162	-0.0386334668762064	-0.019386989827363	-0.0227293147562658	-0.0453880804071397	-0.0261948306048692	0.0309876264687413	-0.040085174659943	-0.0436623720145701	-0.0362620574739711	-0.0545355703909588	-0.0268319747327401	-0.0311358671763216	-0.0369796201036864	-0.0204565454266735	-0.00395546065277347	-0.0590965893278314	-0.0293209469053862	-0.0383644423540378	0.0210071353049287	-0.0114637403577974	-0.0490670951262599	-0.0265476871266901	-0.0121402017249928	-0.0113961982222793	-0.0351000246921047	-0.0931780419782929	-0.00799453393890885	-0.0486945970508354	-0.0632631558215296	0.00654363619793081	-0.0502564602827076	0.00629423786625246	-0.0538822362282378	-0.0463140705860589	-0.0284867375856628	-0.0329187974782022	-0.0282638048115066	0.058098641124707	0.163980777854704	0.124595545003349	0.163746395922011	-0.103109261570704	0.000288677487152203	0.197810209892901	-0.018532405940159	0.0788137268941664	0.106900867119526
-0.033215000684612	-0.0344559032607835	-0.0116918929431733	-0.0283005702007523	0.0966013362741583	0.168390458562259	0.185959561775593	-0.0438118411605761	-0.0113392010450234	0.0215644045379994	0.0424559473700306	-0.016025690072305	0.269364192551077	0.0821393458410779	-0.00604794533691677	-0.0363439439691843	-0.046561134014556	0.0235724171406417	-0.0100716663825349	-0.0235996312106496	-0.0125578756952381	0.0521664509909342	0.0359232147272688	0.348447444475836	0.239526907864117	-0.0447002921677621	0.0663850635306132	-0.0240001509079226	0.315696895482382	-0.0250046709891404	-0.0259788604051215	0.138413926464335	-0.021201978838045	0.167327197809687	-0.0523804837945324	-0.0138859199248886	-0.0401986271740834	-0.026696192152981	-0.0178459707863468	-0.0317916038974966	-0.0544574461572661	-0.0367059783197459	-0.0249161884749872	-0.0524566672881888	0.120763137091529	0.0719357926244037	-0.0396852880442612	0.106362806253324	-0.0745858892783809	-0.0479058009677903
-0.0188127598253683	-0.0369428608347625	-0.0206729130007733	0.000928945985181465	-0.0119266418077643	-0.0276716006247455	-0.0461656633459959	-0.0331807360742218	0.00352986386003233	-0.0572386549091815	-0.0646284670936429	-0.0400966448354097	0.00659493018069996	0.00697859167280944	-0.0583839191812335	-0.0418785971842749	-0.0346054441181969	-0.034811250814211	-0.0456641365460462	-0.063275878395597	-0.0383951027900167	0.000633547850225908	-0.0274179906480088	-0.0265100738324417	-0.0190421086120758	-0.00901622649326539	-0.0193362648608989	-0.0396852900222467	-0.0543166067454072	0.0192524491475682	-0.0380559125493079	-0.0569159107500449	-0.0133931253932714	-0.0104411825817762	-0.0510012159413066	-0.0366743858196861	0.00848066148449325	-0.0379896409886118	-0.0129553702155386	-0.0166396661770008	0.156480494375562	0.0554947761339305	0.0825213217073895	0.0216869620773859	-0.0768317033949005	-0.040863327243688	0.140373401363103	0.00109330209286869	0.191697393092712	0.140071043712427
-0.0121685582886954	-0.0343688275026438	-0.0314739009557747	-0.036198693697232	0.139928198190778	0.182560650923732	0.470978828444279	-0.0202574294450865	-0.00773632449175402	0.157313298055497	0.110623897420273	-0.0124255274362898	0.19777211944064	0.107316993739184	0.0081154207110073	-0.0400808868746687	-0.0335431344338099	0.0830392530957956	0.0204868077406538	-0.0103676677071735	-0.0202379846988874	0.0282565900978552	0.074125727584621	0.162955249768098	0.101956226062693	-0.0698864090093813	0.0903829694884344	0.000166827632707724	0.247180838435893	-0.0578850827393682	-0.0276322098517247	0.528544942284715	-0.0274405394379251	0.0872711589209249	-0.0057600418917839	-0.0170192270870719	-0.0285534702327558	-0.00262371365989819	-0.0152807402140596	-0.0515118584442978	-0.0226733463183872	-0.0285715532067368	-0.0692756898448326	-0.0350910236829001	0.433635473329522	0.0718623156849861	-0.0398690710841959	0.117632555626244	-0.0319129665573038	-0.0746984976976232
-0.00696235478002742	-0.0194912660419385	-0.0324733799605806	-0.0430414339318564	0.138297019039744	0.134776277090583	0.106397752282978	-0.00438862813797034	-0.0452249248441481	0.150754487073995	0.235109008462672	-0.017612750354682	0.119658743937771	0.113452489891106	-0.0560582500160301	-0.0556440478699532	-0.0586056787460858	0.100595328818701	-0.0126880026757776	-0.0169416154727212	-0.0157440367425353	0.0618170914312278	0.127665068901589	0.0573708143744299	0.0854777194405056	-0.0606163164817445	0.115408420159656	0.0253505015001367	0.137225708703045	-0.0379701385242818	-0.0125866824401778	0.165799196173106	-0.0372495745303252	0.0957323058653879	-0.00313719323820348	-0.0241834001303129	-0.0170805928112521	0.050316459761284	-0.0134326100396138	0.0161657967074833	-0.0424664882199012	0.0152311282489295	-0.0642398028395191	0.00245413619148717	0.175607145401045	0.11157376392592	-0.0507130889993637	0.142654273561371	0.0195306650037585	-0.01630160857391
-0.064315377631252	-0.0349620903475883	-0.0094223927195801	-0.0312072116634321	0.47290540254226	0.191029634982214	0.149314665130601	-0.0532522871659323	-0.0378496499318064	0.441473514082711	0.0978013733815827	-0.0357038880937928	0.116174452416673	0.361439131539429	-0.0392474496801438	-0.0510076236341492	-0.0474105547819511	0.275341351406937	-0.0567366975287909	-0.032883648415148	-0.0256361629797537	0.349880987028177	0.435907187147563	0.0965712395803979	0.0607004311664956	-0.0404234499477813	0.45919160982972	-0.0267295859117745	0.122131652278749	0.0193881816565776	-0.035954620520632	0.108427212261085	-0.0258270462123198	0.0692013955430376	-0.0627220884277272	-0.056942704692587	-0.0494123787320552	-0.0320399910425881	-0.0357313732092022	-0.0435165256081497	-0.0821308774116609	-0.05729875295812	0.00917418343176286	-0.0604231087555052	0.0025973098826439	0.1552140450356	-0.0224871080859889	0.325939390289351	-0.0769405641573567	-0.0343274405049608
-0.0330638333334543	-0.0220498957198918	-0.0104956337762092	-0.0111555639015817	0.0751628259887808	-0.032495825564502	0.00235515913391615	-0.0512589741107205	-0.0233518869734623	-0.0213719459167882	-0.00484891781871786	-0.0391771848394088	-0.021509745928672	0.0527490162127434	-0.0636694596090937	-0.0262999587884322	-0.0124109875526549	0.00620373855398226	-0.0294224568419304	-0.043890150886656	-0.00727113980986946	0.0555380018041078	0.0131139562160125	-0.0200951370359495	-0.0142940639147814	-0.0186813842435267	-0.0195303943622471	-0.0358987240004246	-0.07614958105735	0.0533672107078896	-0.0436499669880912	-0.0392262422204439	-0.0148243074438028	-0.00715155859180891	-0.040410825653734	-0.0307215747795658	-0.0388549198111024	-0.0270746902494132	-0.00371165295570919	-0.0257295820873349	-0.00299405220105737	0.0669704619569877	0.0921236722996459	0.121770267228029	-0.00302109942263715	-0.00181823737385517	0.110647893814308	0.0120101366407607	0.0122619883753724	0.00691101816325139
-0.0400217873660568	-0.0458870467529878	-0.0317095215014385	-0.0409950384176916	0.0550839992382641	-0.0827065576045353	-0.0392294952768056	-0.0327542044247582	0.029414030736641	-0.0396702315744723	-0.103049838585036	-0.0364994016595755	-0.0287958517909587	0.0172309180819729	0.00319860303644478	-0.0383015380518066	-0.0567123999916718	-0.037737983765381	-0.00885876418253834	-0.0179598990651243	-0.0505367879595841	-0.00346753741499247	-0.0276943111041294	-0.062129184364746	-0.0644410563168688	0.0149781743313006	-0.0519946984864713	0.00292274227368273	-0.0927170727203912	0.0409307067023132	-0.0717051839002693	-0.0873038993708461	-0.0227838298221601	-0.0232894615065903	-0.0406900636954289	-0.0393459332687203	-0.0206817880151181	-0.0632303598268231	-0.0535018452818178	-0.0359848294580258	0.0128944647951749	0.112945337135776	0.482506651810809	0.164208553037479	-0.0755685249330575	-0.0133112477911606	0.197061945177197	-0.0102216302284831	0.0286439833935853	0.104929097796363
-0.0465094929497979	-0.0230808741004349	-0.0397461486491916	-0.0558478861549335	0.0709553765708124	0.0738780403108909	0.120144994316272	-0.0314734237286184	-0.0194617133762465	0.0986314174805395	0.0798817113329997	-0.0413948764860306	0.221851935777249	0.0906973748456978	-0.0376195733382692	-0.0398321994770998	-0.0528428221667124	0.0557894225020301	0.0115621340455157	-0.0406658737025474	-0.0371596333735743	0.0264887607971469	0.00120311883222308	0.14060414509109	0.139808788684153	-0.0629297226501989	0.0177597182507555	-0.00970421750064519	0.173436210192257	-0.0251358500615571	-0.0165184686421483	0.214771539130528	-0.0297980832348284	0.101263473928424	-0.0238817945843533	-0.0270655758644187	-0.0386742532202588	-0.00863839624545185	0.00296762345338998	0.00174525417039142	-0.035000836553107	0.0275499365983412	0.0173735313696884	-0.0251637437075806	0.242075607474185	0.0593831659211567	-0.0142218054764536	0.0815101513908652	-0.0285173444409386	-0.0140931812426129
-0.0464169165839692	-0.00544972546300359	0.00839581760167838	-0.0178351227433886	0.470321721583545	0.175658977686011	0.0781685459165468	-0.0338243575462251	-0.0289253478329957	0.413124041626752	0.104745247402369	-0.0453932308487875	0.0800773311159141	0.288706818400494	-0.0578806969782606	-0.0630250435180567	-0.0114809017016992	0.348707524196955	-0.0689502024107678	-0.0638992833766219	-0.0296767064852835	0.323624230797634	0.247805956396641	0.121392244309808	0.0482840917357502	-0.0405316933609333	0.393714278367509	-0.0558653956318922	0.107467002356418	0.0442097471004909	-0.0286636347721794	0.00938207226312534	-0.0386605979554741	0.0868984233830201	-0.0510036517845188	-0.056098576121984	-0.0642562448724076	-0.0291256777465895	-0.0487995222470568	-0.0411940174531608	-0.0718183552490327	0.00144450519605112	0.0160214858908011	-0.0558750489432185	-0.00395978408052799	0.12029539561248	0.000666907335037862	0.250495620746671	-0.0625691182685732	-0.0209715942897208
-0.040493598475973	-0.0329569108035722	-0.0453961053490117	-0.0297341093453328	0.0314359075308792	-0.0771178697814903	-0.0288745688202763	-0.0385174272231217	0.026307063964416	-0.0543313635531653	-0.0862030176877202	-0.0330039228697556	-0.0233888548758644	0.000568925125348576	-0.00261174533083325	-0.0419540614211318	-0.0553163990220703	-0.0615231259262521	-0.000490627511615565	-0.0103216252201085	-0.0380172386825161	8.35996404686936e-06	-0.0349665789743095	-0.054078556439468	-0.0425482819527293	0.00217946435776934	-0.0626627345311872	0.0070062728842936	-0.0822621798907638	0.0205893119985596	-0.0722321028902467	-0.0782828108668905	-0.00266654657481925	-0.0572698832029563	-0.0298396367648504	-0.0147032018556349	0.0205923054824243	-0.00783547814792691	0.000787037594796119	-0.0436542659914461	0.0975963541006132	0.151925642931491	0.508996483033407	0.211801899593824	-0.0708898608994903	-0.0224111013117068	0.167802629948483	-0.0311908298754211	0.0592339929539107	0.0531822347625469
-0.0363907663415328	0.00735069159772471	-0.0184904325352884	-0.0123799275543159	0.0304942059239185	-0.0566072552240959	0.0235540029462154	0.00571858967324206	0.0323692623268755	0.0053933633979691	-0.028343101762343	-0.0239544679949729	-0.0272316507449596	0.044890819500202	-0.0280027917047184	-0.0259734952609345	-0.0472659303597817	-0.0108983695207639	0.0315610758237467	-0.0117328350454854	-0.0319789194428187	0.019406459325015	0.0194680961468194	-0.0561206155184854	-0.0543456439082534	0.00494157445028274	-0.0415309198267001	0.0518257554035173	-0.0396495623251945	-0.00760846899408036	-0.00470601232101144	0.0347789275524728	-0.0370723272578403	-0.0610708705073091	0.0168651745256779	-0.027563260761351	-0.0188491060333758	-0.0305933030025104	0.0103158133629514	-0.00164375666250488	0.0121350133451726	0.106869088320814	0.194538570784806	0.132826707830366	0.0499930416000804	-0.0184015798146823	0.103839358889951	0.0260937243455924	0.0540023904326522	0.0253779549589967
-0.00761361116596115	0.000298194755574273	0.0297027057100548	0.0110451855359393	0.185448890293116	0.294469153251262	0.165108379525247	-0.0149661265086051	-0.0206070860999604	0.135207605595339	0.00599015080511862	-0.0114908051232189	0.178669616271174	0.0914514731571996	-0.0414067953336205	-0.0113331435194391	0.00251965926673461	0.084827290881733	-0.0665714600177453	-0.038849348130633	0.0189164382680378	0.107136132232429	0.151163778904832	0.198493135355427	0.154738991134476	-0.0511448735626229	0.162451891243247	-0.0288628627698976	0.222950675108645	-0.0216181280940181	-0.0153741095372048	0.104731747114294	-0.0186148364346728	0.234142926639035	-0.029392232196285	-0.0300697165722022	-0.0466351743014469	-0.0183982287327221	-0.0130359017272914	-0.0227177571302433	-0.0440204393901601	-0.0278614430462002	-0.0627208459354237	-0.0644197022536505	0.0598140812391497	0.0481541621470235	-0.0556315846839321	0.127851411165281	-0.0709006697710987	-0.0629184850982227
-0.00339158851810506	-0.0500126656279813	-0.0372785366247771	-0.0164180699022032	0.0112122515502471	-0.0677222661019635	-0.0313211307280233	-0.0590290450777455	0.0562281035889043	-0.0464342528916402	-0.0796691979668488	-0.00154297872736869	-0.029047418801625	-0.0267021588978601	-0.0126485202233825	-0.010631740841247	-0.0345481507000242	-0.0458869500781785	-0.00254353436496345	-0.0605413054531744	-0.0382999702360815	-0.0322856934627679	-0.0434884363770789	-0.0146317235641377	0.00768678663443388	-0.0133071719956319	-0.0455025897883055	-0.0340533790373961	-0.0310586924584679	-0.0121284016217407	-0.029631471272288	-0.034986332148561	0.0176955241620803	-0.0397564311730105	-0.0407757585166423	-0.0121789302669449	-0.0236134182563949	-0.0377746242709323	-0.044337381393897	-0.048631608316475	0.127402198204938	0.167706656833595	0.16339776843729	0.0967645199927476	-0.0335901940241008	-0.00340856913250117	0.198872912027177	-0.038111385909659	0.0857010655122972	0.121768939467627
-0.0460617233715922	-0.0140267542199081	-0.0208665791199613	-0.0200007616937084	0.00181457331066319	-0.0211049556584923	-0.0146189907507021	-0.024895120735376	0.0220478408428293	-0.0346099252840203	-0.0100036002875502	-0.0155795716706204	-0.0294031663834932	0.00589252900511439	0.004030073547327	-0.0218367395747406	-0.0343842176078987	-0.00119355275795778	0.0188663230397434	0.00957047502719197	-0.0452256513458349	0.0190221433606613	-0.00537743612481959	-0.0227665118901918	-0.0372057526545801	0.00798276810548506	-0.0163639157275279	0.0102681696325017	-0.038607980449192	-0.0243322419313747	-0.0370290730530509	-0.0585439464969303	0.0238211255888368	-0.0313072849441304	-0.0401019695856061	-0.0317611047449196	-0.0425329468667504	-0.0558324247973122	-0.0377792111685789	-0.0298845459395753	0.0443014994928601	0.0962487410894606	0.0999314826915762	0.221552674447843	-0.0405144344244302	0.00573459577854351	0.126519942512615	-0.0039395907455039	0.0180039314220768	0.053613470116262
-0.0896238497831272	-0.0419773680547721	-0.0614846583447078	-0.0351512650832749	-0.0418843490508929	-0.0535938999384406	-0.0821965372385551	-0.0438127233539164	0.00540921779996481	-0.0818998646932731	-0.0593555860445474	-0.0647179012301526	-0.00328165004728775	-0.0262319869311485	-0.0881491998525117	-0.0810041605457853	-0.070567059559476	-0.0526646977292685	-0.054041893263852	-0.0588736548955374	-0.0639033310266167	-0.0497343267675941	-0.031216001443194	-0.0536477642938949	-0.0399482155206168	-0.0518071136091889	-0.0532930345074476	-0.0291692875301725	-0.0580536236096598	-0.0211721004661219	-0.0499032218054876	-0.029094643305143	0.00701209463169724	-0.0384741981328873	-0.0169387078797448	-0.0824757449689223	-0.0140029440996081	-0.0646712059070164	-0.0298809089169419	-0.0460370435504523	0.263716548782307	0.310496462142527	0.149373020402945	0.176581874221597	-0.0693453761235337	-0.0630430742646359	0.241035742200071	-0.0321271991212008	0.262477594554485	0.110781369053608
0.0257893769539137	-0.0177184858503224	-0.00339747330845303	-0.0172609341806185	-0.0428510685423633	-0.0559755851704982	-6.93761256709902e-05	-0.0373649151267239	-0.0160601556503936	-0.0806168895902984	-0.0723046723617953	-0.0172606616584601	-0.0389854157055729	-0.0656973785069034	0.0356754888008741	0.00602519637388757	-0.0554900324786614	-0.0816064911890503	-0.0259625691308334	-0.0319862988804893	-0.0284851544457697	-0.0463781998599366	-0.0908598448025479	-0.0504412062514695	-0.067056866307683	-0.000233142441821716	-0.0876249629928631	-0.0721014830294828	-0.0914524258427328	0.0200786107087402	-0.0436542345954026	-0.0270976111330481	0.0384388127655958	-0.0561916161979368	-0.0695111390684051	-0.0283149422482153	-0.0542807842645566	-0.0240316644209352	-0.031409652549793	-0.0513115060714924	-0.086909864880785	-0.0756860557598152	-0.0140665760141986	-0.0374095460468244	-0.0414737916248949	-0.0349412863867183	-0.0233216058949524	-0.0665624781949485	-0.0973054226310151	-0.0552919220686564
0.0294799506863469	-0.0452861228474453	-0.0328622640226092	-0.0466083145786517	-0.0555329169404986	-0.0738076863845078	-0.0072561078327064	-0.053054160296478	-0.0242057357798825	-0.0914877452153055	-0.0913799331276907	-0.00649777108809161	-0.0484217557213017	-0.0750149825715632	0.0151021867394114	-0.00324208991764105	-0.0406956845446974	-0.090133713707992	-0.0233135945998417	-0.0198797207219704	-0.0128348101580814	-0.0561128089026757	-0.0909279638542292	-0.0491815811121122	-0.0398485569346878	0.00847416921049139	-0.0995986274558421	-0.0599559538154098	-0.0969170591685393	0.00731756026816674	-0.0403809706371283	-0.0195152612014873	0.00818914272912332	-0.0555656579968017	-0.0517398969548245	-0.0196255538028051	-0.0302801050998169	-0.0310368410332686	-0.0360195172418475	-0.0456101114620247	-0.0530105515980399	-0.0576369359446409	0.00114108572214765	-0.0558794192836679	-0.0358866610465478	-0.0516517893091079	-0.0290310189407265	-0.0692938773137647	-0.0952416541048888	-0.0357002342520397
0.00525816705759314	-0.021599444379124	-0.00979966794991824	-0.0290343373145005	-0.073949718066882	-0.0656034567987597	-0.046664232502722	-0.00682874423333664	0.0191251987369177	-0.0879638720092499	-0.0768156937953564	-0.0022909484758317	-0.0469679908120344	-0.0715291462406991	0.0313015957149219	0.00130132250261755	-0.0273051426972611	-0.0874450499305989	0.0602807490845482	0.0313941113303034	-0.000226329203396472	-0.0667117594313066	-0.081625653313526	-0.0408454210396815	-0.0507512468791767	-0.00109182929697751	-0.0897974577085931	-0.00428432217668356	-0.0608305344491522	-0.0568742891917584	0.000293527897503309	-0.0144724371079436	-0.0547268234506627	-0.082613076682278	-0.0429095611516747	-0.00392377307013625	-0.0409323786856693	-0.0237784505909731	-0.0375207140192515	-0.0331168421097642	-0.0214135815568721	-0.0664098007875158	-0.033539654737406	-0.0259403647759584	-0.0293122733604076	-0.0757925014795126	-0.0445728656153697	-0.0712495671841757	-0.032799440247319	-0.0526010876692257
-0.0153380704742443	-0.0428951947597317	-0.0282121196370047	-0.0446382277087068	-0.106925723580342	-0.0213600171541811	-0.0773597161616672	-0.0486927897359382	-0.048737528269571	-0.0707319992459356	-0.0543720770232848	0.00432133325394295	-0.0299858989305784	-0.0952307388737615	-0.0559532433597775	-0.00149756967783155	0.000700786995748863	-0.0485534569159078	-0.0660172709989101	-0.0198374089497314	0.0272064046998793	-0.0783928528487019	-0.0519339396340512	0.00829457067991275	0.0152602113246448	-0.0582071823700646	-0.0385323441685425	-0.0709439673922763	0.00688925365551961	-0.027031355866397	-0.0382241481310489	-0.0995637952126828	-0.0393869256128978	-0.0217600679188215	-0.038595651663906	-0.0190737829638135	-0.0526354118461692	-0.0338367668968058	-0.0557776594438338	-0.0329957440480558	-0.059561625672682	-0.0823978965864778	-0.0907419163338828	-0.0562913573457115	-0.101980522633154	-0.0735714203425327	-0.0622744401196801	-0.0703215213230856	-0.0548395953393488	-0.0610740348191583
-7.2445556006817e-05	-0.0538925300999222	-0.0205586943014207	-0.0434965800641848	-0.0352608023049489	-0.0650181465327108	0.0332009487767337	-0.0434508766285357	0.0182344866018756	-0.0779737140496376	-0.0947569176918919	0.0173920397665013	-0.0615302403324542	-0.0792676176424739	0.0683349777878855	0.00930945493848628	-0.0447550839048459	-0.0869556533605529	0.0316803488202966	0.021038966704592	-0.0168813935581382	-0.0646544178133238	-0.0777856190417749	-0.0480421181307738	-0.0644500252663055	0.0406428901645339	-0.108112628796023	-0.015540610918923	-0.099371441506156	0.0175844487841904	-0.0386948421544854	0.0153326425454859	0.000777812320247126	-0.0625406056150098	-0.0731333256827512	0.010949227615945	-0.0381796429271415	-0.0523320029618125	-0.0600751286490007	-0.0479684205292352	-0.0823733703048961	-0.087214403099966	0.0285241035378966	-0.0592479685219138	0.00348100795216067	-0.0273443410590398	-0.0363814453825368	-0.0810949912504301	-0.0826750675182102	-0.0415565763352704
-0.0197537970901321	-0.0082437730499585	-0.0435931821034871	-0.0320307060657592	-0.0820041973605476	-0.0590439701990541	-0.000940095048606007	-0.0350551852707305	-0.0746482834078471	-0.0613998233181691	-0.0547331995829653	-0.0346800898890141	-0.0476410340546552	-0.0853926723955149	-0.0128426687318444	-0.0212754643133197	-0.0536521538316912	-0.0698568479829048	-0.0265176051099056	-0.0455907072635182	-0.0471386491112933	-0.0880402604986304	-0.100671685804014	-0.0704721188763833	-0.0581705571158337	-0.0395791907417039	-0.100425753691237	-0.0307828520195868	-0.0485802333668136	-0.0752859384249462	-0.0241734171360287	0.0571501464445823	-0.033647660930248	-0.0827665857667362	-0.0719968534600397	-0.072213189305574	-0.0547110099757642	-0.0243220716301972	-0.00853302563409191	-0.0301449714788807	0.00417186841073394	-0.0284151927268422	-0.0360052928316187	0.00830856456464272	0.0753748390227423	-0.0463476705619796	-0.0127479672706902	-0.0838718050983386	0.034283856284198	-0.030537196000335
0.00595300336393467	-0.0326817172971487	-0.0503600244273963	-0.0452808226177837	-0.0398626283971499	-0.0574733075022677	4.50738267740625e-05	-0.030940128795943	-0.0136678728702932	-0.078657870430265	-0.0820732679243386	-0.0138214288896167	-0.0200527900356985	-0.0537326209979652	0.0172077428406023	-0.00719729425064378	-0.0585499801552607	-0.0658463111720339	-0.0373164138965552	-0.0408021191922293	-0.040794389013172	-0.0522384980984589	-0.0937040154118847	-0.0496243109387798	-0.0537438912954316	-0.0242045829552853	-0.0849763692389467	-0.0269207222646353	-0.0502507598298834	-0.00393337732061921	-0.0509039510799924	0.00986371758097254	-0.0123039275304492	-0.0542751703093064	-0.00147858929301716	-0.0397836412944558	-0.0298119211675533	-0.0226791685508019	-0.0141233664165575	-0.0350201188900148	-0.00644910223918943	-0.0209813154125562	0.0216538722716216	0.0108468185769244	0.00603233778268296	-0.0547139190915236	-0.0317458777856135	-0.0521599342812138	-0.0282278537418507	-0.010865574356488
0.030029608619638	-0.0477762276950191	-0.0375656826854371	-0.0433123371863271	-0.0637252163778326	-0.0746721576049255	-0.0516713791532553	-0.0464665168254661	-0.0297999113253247	-0.0867920236097807	-0.105295382408631	-0.00315273509335586	-0.0498142228884259	-0.078715951014662	0.0470277048278148	0.0153584690268342	-0.0371178570098525	-0.0906207235152129	0.0124900821722407	0.0314622381082735	0.00561430053483056	-0.0582553096888088	-0.100594938783385	-0.0510373186600559	-0.0495434041780564	0.0416570441910453	-0.0974170024074005	-0.0164512362909481	-0.0997612991457578	-0.0034867877352666	-0.0498171341025875	-0.0870303169287876	-0.0331219476854902	-0.06998000502151	-0.055998844447713	-0.00604266189037525	-0.0391155402328748	-0.0153822361849656	-0.031006963742925	-0.0476975736280484	-0.0451613512050256	-0.069895315417291	0.0243800779256977	-0.0337707748356988	-0.0787697534600953	-0.0660769674058771	0.0100238937763202	-0.0823680730361351	-0.0790291276111472	-0.0428207956973262
-0.0301177627294521	-0.00121067141497662	-0.0133495557114456	-0.0297324726993275	-0.0870050169876324	-0.0423353062452469	-0.0868781195946506	0.00153670292664942	-0.0399531523711151	-0.0870665308094879	-0.0451844863078237	-0.0514539810257638	-0.0349308897674462	-0.0791100128071821	-0.0474337296368791	-0.0277053077237132	-0.0493422437716819	-0.0672316352602042	-0.0712993857747208	-0.0253977029905499	-0.0183297516362047	-0.073531426644341	-0.099955796769193	-0.050344175903652	-0.0599148308545706	-0.00132955943614007	-0.0896561733130194	-0.0630004389714936	-0.0599550665812111	0.00108009197936962	-0.00781337479922442	-0.0805521352178819	0.0119842660491911	-0.0844750615023945	-0.0322332789315043	-0.0564228297783317	-0.0603664661830159	-0.0462139671858935	-0.0478178024005751	-0.0280905517161056	-0.0196160357436304	-0.0100905348583127	-0.0504641962686008	-0.0376009423190307	-0.0866770504524943	-0.0677625066532394	-0.0065644340063536	-0.083641811035477	0.0172193845266869	-0.000861866311244882
-0.0118561036260974	-0.00743915969687356	-0.00153649681046502	-0.00127120570571637	-0.0770151817239161	-0.0406482641456589	-0.0498486801594234	-0.0318028136390087	-0.0400028198880309	-0.0719968492842815	-0.0564807932328622	-0.0390125957285588	-0.0716585158302152	-0.0795538618848589	-0.0457064391925334	-0.0324614303986369	-0.0255999905673326	-0.0580998500984417	-0.0408941775384209	-0.066038168995914	-0.0422382323273675	-0.0586649883397364	-0.0829058566416485	-0.0387969804407255	-0.0429578828465264	-0.0335034786079535	-0.0575442058711411	-0.0521292262081487	-0.0440829943924467	-0.0351159512211537	-0.0234755292279672	-0.0400161971788996	-0.00609567261671274	-0.0598763724098746	-0.0296843492980092	-0.0587095349488414	-0.0362210259187713	-0.0171563031685444	-0.018933650699778	-0.0327139319955814	-0.024032246382928	-0.00514997373769832	-0.0330216248975176	0.0754142667231	-0.0285728983533167	-0.0598236786306804	0.006682457410889	-0.0638523595978448	-0.019438365398739	-0.0386870425115059
-0.031403546108759	-0.047402248465177	-0.039130187798287	-0.039059484153322	-0.0903139700266649	-0.0270296304937487	-0.0749624094428139	-0.0691533933345988	-0.04373762192965	-0.0842092794286843	-0.0500773719976448	-0.00439134942756347	-0.0628415166159502	-0.0882140453255443	-0.0770031932287788	-0.0286926813309991	-0.0160918584363371	-0.0504084722669793	-0.0795483725706363	-0.0379026845587329	-0.0307965338526592	-0.0648126795036856	-0.0486190948433976	-0.030932021525914	-0.0292674922403367	-0.0351586377190103	-0.0511121577832713	-0.0611630397482546	-0.0627293629609993	-0.030493066725446	-0.063862425604192	-0.0439671560767619	-0.0186647756515971	-0.0497591414166924	0.0139569847352307	-0.0609760654376763	-0.0223021803588743	-0.0398012548188885	-0.0414295266838741	-0.0365026372433846	-0.0715772603109855	-0.0172239308258721	-0.0318415741998706	-0.00215987631108597	-0.0638262837117845	-0.0532743598219354	-0.00739372472881457	-0.087109708566972	-0.0530813263787746	-0.0198620524527671
-0.0168102951752515	-0.0218470338641391	-0.0176003884306299	-0.0206616349668866	-0.11215815618785	-0.0488299124949504	-0.0898479407077104	-0.0256515786301979	-0.00989306308085136	-0.104228880415833	-0.0734031749411696	-0.011830969766374	-0.0680503519026252	-0.0920717726532844	-0.0734982812512138	-0.026987670137843	-0.00811277370439626	-0.0748716774858915	-0.045911778201932	-0.0593842993074321	-0.0270003077590881	-0.0715996200467588	-0.0953636492954728	-0.0346067018406466	-0.0319386050704366	-0.0058048716611985	-0.0720184645750066	-0.0396281120067004	-0.0345295608911581	-0.0402616543368998	-0.00476743642779291	-0.0467931619274672	-0.0183327167064249	-0.0561716232136278	-0.0086756153283465	-0.0324915774708097	-0.00295513288009819	-0.00585201808467594	-0.0228013509076909	-0.0266481766181756	-0.0015360723917238	-0.0400920860056479	-0.0569199716790259	0.0432120084556319	-0.059870177845009	-0.083760160257957	0.00939510890106483	-0.0727008360911374	-0.00585386707465314	-0.0462304031462654
0.0151804188565574	0.000254858405317005	-0.0344220483256017	-0.0356554819215729	-0.109500179305354	-0.0842408551873239	-0.0980438193291236	0.0140221452858173	-0.0332786445173821	-0.0531918290707675	-0.0224385162430883	-0.0419042720370088	0.0132683176637438	-0.0351857732433116	-0.0494550084126959	-0.0500993116518856	-0.0314647659684093	-0.0413536863685313	0.00227214620979429	-0.033943673646873	-0.0243335247649975	-0.0983983746344843	-0.12472980481517	-0.0847633017475728	-0.0435560555018071	-0.0483229711684982	-0.0982211162388333	-0.0263163857106518	0.0114386988257513	-0.0405274938610761	0.00578056903448716	0.0489776716574524	-0.0241159956229779	-0.0896203787614299	-0.00435570521728907	-0.0102645092458629	-0.0307271356912064	-0.00906466906692189	-0.0080205807321702	-0.0208327929893011	0.0661237873676102	-0.0181774356628879	-0.0657387570595636	-0.0573535912180285	0.0453511713471194	-0.123240758684566	-0.0789416402565303	-0.0445566920473682	0.0436428977705623	-0.0116114337468023
-0.0132150716290614	-0.0234625503420538	-0.0412048140958622	-0.0316113656279742	-0.0955469848536879	-0.0579013080911839	-0.0512966893865451	-0.0341891164714943	-0.0557573980739619	-0.0778840154484607	-0.0468757782037347	-0.0113201308606362	-0.0706442525844865	-0.0790340135331625	-0.0584620219558421	-0.0115790877822005	-0.0238456324906857	-0.0536309062560849	-0.0464881957370661	-0.0725209605942924	-0.0203129836541737	-0.0760941696419764	-0.10462429813493	-0.0397144691252412	-0.0454326726113584	-0.0554440232473731	-0.0869392908121478	-0.0519085813820504	-0.0243618310871254	-0.0591248348661048	-0.0272438884903279	-0.00265538472164124	-0.0592465584633749	-0.0586666735841838	-0.0230320321574093	-0.0635757802502381	-0.0401168970830763	-0.00406200735194392	-0.00516032451869559	-0.0213871074508949	0.0363992194305509	-0.0221968764655343	-0.0252102824169706	0.00653040058260647	0.00372978240723696	-0.057222555246229	-0.0285963798756919	-0.0651038726054998	0.0244584364110991	-0.0232110816744691
-0.0400544740985392	-0.0430046335020927	-0.0627726102388145	-0.0738767111393764	-0.0878576591094349	-0.0576294138351089	-0.00901200803601286	-0.0625692828219522	-0.0715965991325825	-0.0699084417169907	-0.0617424366793406	-0.0349467186779613	-0.0553515563619413	-0.0878554242510685	-0.0227473027644705	-0.0254051830403077	-0.0432869757489116	-0.0607644612320595	-0.0664689522088166	-0.0418831595516569	-0.0664945351266965	-0.0730869843878457	-0.0645229682252532	-0.0595046774128831	-0.0425562315085902	-0.0432963506865099	-0.0632298230593926	-0.0653506014423489	-0.0407337208500069	-0.060497979472631	-0.0676308260245782	0.0348977936451115	-0.0266173573094932	-0.108175478128306	-0.0106437712743273	-0.0499015451160104	-0.055651449715525	-0.0402183188600481	-0.0470346085418834	-0.0474254321929748	-0.0184355442029163	-0.0483048481327068	-0.0759136381845309	-0.0489974391915275	0.0195152550364621	-0.05958662288117	-0.00468260232956484	-0.0875206960583251	-0.0222107781798418	-0.0207320822054735
-0.0245883464438608	-0.0294736281729882	-0.035203878787897	-0.0427491920190317	-0.102353956449019	-0.0488558504048281	-0.0613309868035188	-0.0289373866349085	-0.0409447768387723	-0.0817404945305779	-0.0617090062778354	-0.0159728463203994	-0.0524625052166135	-0.0834676005817909	-0.0548700848278228	-0.0326494618123052	-0.00729264408778125	-0.0503940104759763	-0.0620469430447836	-0.0455440808227129	-0.0267025326868171	-0.0721067036078647	-0.078237150978214	-0.031392308567788	-0.0114044165215539	-0.0189327154267409	-0.0617785429074404	-0.0449998002343413	-0.0217772370766809	-0.0461526480771602	-0.0190952653302529	-0.0438852206655786	-0.0334752273419753	-0.0697473715424973	0.00627532224358152	-0.0458231587094586	-0.0315435435308314	-0.0127015582398273	-0.0301614201144111	-0.0252614833059341	-0.0118188274144148	-0.0194717321973391	-0.0405924610483431	-0.00628205442964625	-0.0323048993853784	-0.071975154945134	0.00538863586894275	-0.0739698710393704	-0.00464108467737655	-0.00460840337942283
0.0311516161838946	-0.00833176074487931	0.0152717542565612	-0.0150019887289865	-0.0628705729864362	-0.0486614790703436	-0.0671356468365815	-0.0093174890901659	-0.0191007597760161	-0.0958744897544208	-0.0700288731182985	-0.0149569769377371	-0.0246523514225102	-0.0575783586613051	-0.00848792465998182	-0.00669544497203398	-0.020506851461287	-0.0775427661330797	-0.0581834004943549	-0.0216795153649182	0.0130982568765423	-0.0377966620388543	-0.094294298049495	-0.0219597417718304	-0.0285337503205671	0.00713276159725762	-0.0787244037585518	-0.0809260737363218	-0.0679133410700188	0.0109205108612637	0.00989415746191542	-0.0830662473610411	0.00172282364274127	-0.0495823106961686	-0.0517587198577621	-0.0237077854543623	-0.0524143885223586	-0.0149654806518428	-0.0383645116223422	-0.0418452062484645	-0.0555062895844636	-0.0837947410714866	-0.0252948640595723	-0.0611741161083664	-0.0922148022341251	-0.074413231694274	-0.00672078350218854	-0.0572005033564704	-0.059109163523012	-0.0458532189432225
0.0126084049011116	-0.00300888848015597	0.0281203256005681	0.00217932303317087	-0.0498414239148058	-0.0419753781021776	-0.0714417547234294	-0.00422488917691946	0.0194060214453404	-0.0934508081113787	-0.0820986519947903	-0.0290600869819966	-0.0189480534615821	-0.0442010845620384	-0.00535983881151985	-0.00896657515733088	-0.0347760963026756	-0.070838342416978	-0.0346880327256642	-0.0106805341528159	0.00122980441736685	-0.0245724803780194	-0.0831363114656908	-0.033577958995958	-0.0450087131525464	0.00179559993369637	-0.0710414041007168	-0.072075132921946	-0.078393332028111	0.0164241439837487	0.000723084868146762	-0.0955610555604751	0.0181787902124141	-0.0497084286251879	-0.0362591215158034	-0.0302290768306921	-0.0464040492658747	-0.0254355996687989	-0.0459900886604189	-0.0306529360819034	-0.0758184218470826	-0.0632475975722987	-0.00433954953525171	-0.0471041233342035	-0.106318958038585	-0.0792713368778247	-0.00583720167942263	-0.0451167183536073	-0.0756684423402069	-0.034674237006072
-0.0466971783780308	-0.0410536142896808	-0.0251021016107393	-0.00407549775192754	-0.0908879712092195	-0.0337995520609421	-0.0644173256805974	-0.0439662347117062	-0.0267889315672945	-0.0714337842428661	-0.0390118303174898	-0.023326014533693	-0.0548788377358616	-0.0941854511344261	-0.0621526047884599	-0.052475403886094	-0.0121936985618774	-0.0620900151251261	-0.0815448987497936	-0.0380220457620606	-0.0239182671906807	-0.0671732775440342	-0.0702014512245626	-0.0147255990128053	0.00503630699772023	-0.0456090654404262	-0.0406312988710027	-0.0330920792172467	-0.0336757860480439	-0.0411815541326709	-0.0487495928438109	-0.088187661074896	-0.045295392485877	-0.0663870227389299	0.0246904463285464	-0.0411044627397162	0.020867888268585	0.00119559388815125	0.00575138510601947	-0.0374845360213629	0.0282054434044558	-0.0252494094040287	-0.0354712518661968	-0.0366002854106878	-0.108514557446464	-0.0597982759614048	-0.00812161263142771	-0.0883909293739706	-0.0388824749047191	-0.0437728609288918
-0.0236895115727707	-0.0500425450403625	-0.0274940383737262	-0.0100502980709279	-0.0734874501187177	-0.023110898347843	-0.0761063193030709	-0.0582007104935185	-0.0224302397735405	-0.0476923534487215	-0.0586386751670656	0.00269959225244699	-0.0440679335896381	-0.0970368443476421	-0.0523419367792559	-0.0325553278468885	-0.0193656248859185	-0.0502208522968582	-0.0999699912255641	-0.022549229852203	-0.0301130627587585	-0.068932561454922	-0.0623140414828508	-0.0165939466354461	-0.00130732049471855	-0.0202909878350274	-0.0290064993013294	-0.0531372403745937	-0.0313195138053437	-0.0125601176202123	-0.0527977624308265	-0.0914948661933514	-0.0197849131700685	-0.0470236259188092	0.00510277109208181	-0.0591408809292029	-0.00709451397008403	-0.0167170629742555	-0.0131851358934152	-0.0218751263328894	-0.0294516260973435	-0.0318664196594919	-0.0426536434803995	-0.0463267755117522	-0.129085126020546	-0.0791684392699629	-0.0189265472453798	-0.065312675214745	-0.0676421500998171	-0.0570981575376102
-0.0349891139337944	-0.0102762932981641	-0.0226696585076288	-0.0353151349140064	-0.0908590452309797	-0.0291127613570168	-0.0702440578107931	-0.017228125131436	-0.0221950070846138	-0.0562658660515213	-0.00533302171515678	-0.0154185271454476	-0.0387892305249991	-0.078897269836721	-0.0560558553319793	-0.0509586810510268	-0.0131272477302538	-0.0475223059385684	-0.0730679914926225	-0.0282698924685937	-0.0206430823239294	-0.0712099109715328	-0.0685877528404967	-0.0298095630124688	-0.0173486171933069	-0.0465292586548339	-0.0457710026688356	-0.0264219197302991	-0.00967493248530425	-0.0378482365385589	-0.0187320490587559	-0.0488256596104169	-0.0434847211841886	-0.072031812968711	0.0411338300880582	-0.0514861302760226	-0.00856058752399244	0.00156702500289848	-0.00523029973586152	-0.0183167610706166	0.011142999436053	-0.00421215433801385	-0.0344004541638739	-0.0099491573933884	-0.0700047052313616	-0.0589013503991289	-0.0289639168473079	-0.0664142641668162	0.00721159395490101	-0.0346380732751745
-0.00142018019737398	0.0194887561236955	0.0159680886765108	-0.00112461667538491	-0.0673591792438639	-0.04423665628934	-0.0853036693827278	0.0182851402408589	-0.0265373466778598	-0.0840324683928731	-0.0506582283448394	-0.0479252955055305	-0.0338505254863456	-0.052597076547272	-0.0126317926687524	-0.0383508329162271	-0.0364358023049356	-0.0599505470617249	-0.0485042812613516	-0.0226863201883238	-0.0218201286371191	-0.052672313918883	-0.0802232960000454	-0.0386389952451539	-0.0544893104476903	-0.0265521738875681	-0.0693666344493412	-0.0708255356456218	-0.0591457401039728	-0.0398215489139371	0.00185221538977249	-0.0471406244681103	0.00393770638579304	-0.0810952574384052	-0.0255176406670965	-0.0484502559584603	-0.0607066160245458	-0.0361932445313354	-0.0319798775897011	-0.0195156718758984	-0.0076334513005964	-0.0403021644415982	-0.0373067724039376	-0.0269148944768113	-0.0600242046281054	-0.0782295576178327	-0.0450119767692264	-0.0519285727281138	-0.0205386359747436	-0.02969141446525
-0.0150129544684538	-0.0293916024561587	-0.0173003784552631	-0.0297774053432116	-0.0441785341402055	-0.0215186449576513	-0.0780042742727067	-0.038583359571071	-0.0441420146887229	-0.0332176965253984	-0.0450491918834391	-0.0493678124711853	-0.0138838477110107	-0.0323555131937068	-0.0304224993432411	-0.0370000470679661	-0.0256601318383888	-0.0290543894386089	-0.0843793633247529	-0.0159595370504045	-0.0155376786259929	-0.0242063169891534	-0.0535709033339398	-0.0332219569381653	-0.0175591271143505	-0.0179432235921032	-0.0112313851621414	-0.0410811657203796	-0.0432738742979718	0.0338727328342846	-0.0407797793840517	-0.108013884157489	0.00815595175890807	-0.0252091680610206	-0.00556029599786367	-0.0456750085851492	-0.0133827488633186	-0.0168130512248522	-0.0365280117655183	-0.00980199617303387	-0.0508209678349589	-0.037200978168912	-0.0322204540677993	-0.00680891954032362	-0.136204164361412	-0.0601589675922261	0.00762244239944834	-0.0267857602583781	-0.0547742454564869	-0.0253329020382074
-0.0327839712699241	-0.0162499458033707	-0.0272181973599975	0.0164879646074812	-0.0909418347034985	-0.056008301029395	-0.0943661435400208	-0.00623370359097269	-0.0311328939835421	-0.0598693899214384	-0.0394473267630079	-0.0463220286921667	-0.0358707028681062	-0.0735940625164873	-0.0539883009123365	-0.0448789524411724	-0.0354533949431924	-0.0518105694172736	-0.0712350838836956	-0.0499962728226039	-0.0405828486107867	-0.06081043561016	-0.080537027216874	-0.0303080702175824	-0.00928310240986335	-0.0451143543349855	-0.0565221870720231	-0.0236111479592027	-0.0156150330574459	-0.0393405459053011	-0.01204274290381	-0.0670488042151143	-0.0402237738581194	-0.0712123164255182	-0.0171964618356778	-0.0415945772803503	0.0180635482657299	0.003682666700498	0.0430096488096224	-0.0224850681000048	0.079996080259376	-0.0207432705128651	-0.0630922572749073	-0.0516940949990799	-0.0725152181646738	-0.0874068901189694	-0.0109488843466325	-0.0659598516056845	-0.00316452104948607	-0.0373797635641794
-0.0218207356229489	-0.0112396294268088	-0.0374814496855041	-0.0345676798736021	-0.069641590467842	-0.0828674197745452	-0.094543179999534	-0.0105887399119483	-0.0527977347810301	-0.0534088368426	-0.0626141315331828	-0.0108642953868811	-0.0275058608412802	-0.0748750339332132	0.0198585002708623	-0.0195187027220037	-0.0439737456889772	-0.0631670934072104	0.00130941576220775	0.0224803773839714	-0.0293200428337927	-0.076153622481229	-0.0818277299762	-0.0429124908248934	-0.0469426996502379	0.0152830070229446	-0.0913923725990594	0.0258486215179199	-0.0298339720554266	-0.0411884928893135	-0.0220756372859117	-0.0285464572406646	0.00827905776175524	-0.112672333577459	-0.0490532156152224	-0.0494046785321769	-0.0492626223225313	-0.0492944895440195	-0.0493443008956507	-0.0276789570111849	-0.00060348632647003	-0.0104092637662931	0.00728746972813167	0.00314297630317151	-0.0458965371596277	-0.0777349906249595	0.0167668591323665	-0.061735517120346	0.0274573481768169	0.00784159034675857
-0.0195517260588528	-0.0267740336720047	-0.0394905119766588	-0.0381661639063164	-0.0752233358272097	-0.0316708981445991	-0.0844273522320024	-0.0313124712312425	-0.0254476053794385	-0.0299923728888144	-0.0335486169094064	-0.00746240168454842	-0.0513334705018794	-0.0911779145861515	-0.048866377604138	-0.0354420330690254	-0.0314857162258663	-0.0352402821046842	-0.0880237243843145	-0.0399801466211391	-0.0458486830116273	-0.0793165274858326	-0.0658626388368018	-0.0482641953337702	-0.0328358381216714	-0.0306393704867016	-0.0369692132110326	-0.04565361343648	-0.0339070514409268	-0.026758351031332	-0.0465388642511108	-0.0682082160308066	-0.0357000705292205	-0.0682770802766456	0.0404948541685289	-0.0697145319567975	-0.047103180960207	-0.0293428279479427	-0.0269496446415898	-0.0310327623999831	0.00278352259007716	-0.00012045516222686	-0.0531146669299834	-0.0110055839425886	-0.0897026186347689	-0.0844724993395407	-0.0251283003476945	-0.0638237938487242	0.00822932653034725	-0.030117691436626
-0.0432429305641122	-0.0308906268882377	-0.0350334310130886	-0.039082872577092	-0.0450778660811702	-0.0290358358317861	-0.063836140779736	-0.0300703118544055	-0.0617802586871248	-0.0508161736980371	-0.0444017284176336	-0.0437115583801292	-0.0381542383025073	-0.0445065397058173	-0.0514964238636468	-0.0414222550245467	-0.0194341717849387	-0.0331617177779318	-0.0891108074860597	-0.0431109465954379	-0.0298934408275857	-0.0290910484468177	-0.0639431076503312	-0.0311646322609544	-0.0235390617052605	-0.0201646502159438	-0.0341548201116754	-0.0628227798911736	-0.0704541703704691	0.0150240583856895	-0.0364784965053879	-0.122772045789419	-0.0115281082374394	-0.0315954959740935	-0.0245699728129434	-0.0515377929591576	-0.0477395850803147	-0.0154123759659653	-0.0442449326156757	-0.00512727450208624	-0.0593237520183135	-0.0381432458276765	-0.0142035172145331	-0.0141244034483524	-0.119461347132926	-0.0637899579316951	0.0058952718542802	-0.0436572552928176	-0.0568789021580224	-0.0217765523947336
-0.0473856437106991	-0.0276450482424162	-0.0550567658798043	-0.0272514281166285	-0.0764364523276633	-0.0765955032443733	-0.105703409970004	-0.0244751646007983	-0.0743061018245493	-0.0675623746668886	-0.0637886322018409	-0.0700229004722544	-0.0393217686908775	-0.0706135452405699	-0.0681386836093996	-0.0650715089052736	-0.069439819497622	-0.0570268652951406	-0.0728741573768007	-0.0554391008638634	-0.0454506850391723	-0.0648857046143516	-0.0751486529784176	-0.0382792682816998	-0.0293571562068266	-0.0401802308554262	-0.0621195279086844	-0.0406571729201755	-0.0435894177401391	-0.0495064732988887	-0.040680652291564	-0.067461549760605	-0.0333893544976242	-0.0951800787087775	-0.033498017949342	-0.0698793317774976	-0.0211624726209334	-0.0358570062694672	-0.0119152662009153	-0.0397823295779853	0.0710454428898001	-0.00125604561422351	0.0171256323802498	-0.0173999249131844	-0.0801840215342153	-0.0907560102399901	0.0140662046147539	-0.0663890225196492	0.0174735304366001	0.00564360997131872
-0.0287532991167784	-0.0205191979960178	-0.0229323598835109	0.00338927712575765	-0.094075587143223	-0.0651010949886867	-0.0267272409905086	-0.0259329333540986	-0.0461246395800545	-0.0730075502633732	-0.00576812728128838	-0.0542302894350266	-0.0473083594279174	-0.0642242092479506	-0.0276573957106911	-0.0582658362493882	-0.0212328038106985	-0.0582488826096838	-0.0176090681725924	-0.0461380386873791	-0.0289108427335865	-0.0536704676236783	-0.083815592918892	-0.0725734382341873	-0.00476642769407253	-0.0839534260815692	-0.0661379302905515	-0.036443036154229	-0.0471698835463826	-0.0820720576967272	-0.0211299779822988	-0.078292412822593	-0.062146012195317	-0.0239696793401324	-0.0361323807600547	-0.0452399992121465	-0.0348359246139435	-0.0153131273043926	-0.0364532690207957	-0.0197869165136261	0.0147123704044593	-0.0401072930822674	-0.0991025067918327	-0.0829407831919329	0.00936921113998406	-0.0452557044256691	-0.0696567537025195	-0.0741209412934531	0.00279037433051468	-0.00660420715823099
-0.0322340088858738	-0.0265224207360818	-0.0328140631836782	-0.0403090343652417	-0.0573219074062721	-0.042775440818381	-0.0665919763860688	-0.0225722410013775	-0.0354984978535588	-0.0462747990459289	-0.0240031757785421	-0.0479648895033716	-0.0440090276794795	-0.020949710432472	-0.0496917040811663	-0.0168490790917549	-0.0189315136855735	-0.0302039050380734	-0.0397415195237414	-0.016249248395767	-0.0161895864068773	-0.0309422608621748	-0.0417037823373031	-0.0423962988295537	-0.0363281521622365	-0.0447437690814966	-0.0277409790247801	-0.0144427718690018	-0.0427837579969528	-0.0332729182737404	-0.0322395938092828	-0.0363710880285821	-0.0262181648108427	-0.0452625638210054	-0.0234612777611336	-0.0520294837025445	-0.0388799619408337	-0.0313611802073935	-0.0287970238048727	-0.00615889201747572	1.84222588275263e-05	0.0179239459755594	-0.0355229875443119	-0.0488311454783358	-0.0384517270256337	-0.059236352185784	-0.0378808816119785	-0.0221516050919569	-0.00601074869029984	0.00871100578756453
-0.0354728412773155	-0.0386600153277998	-0.0537139033140468	-0.0604915934221183	-0.0732082885406227	-0.0425888593298424	-0.0331801988179729	-0.0365140431705317	-0.0137558054369087	-0.0383235906590299	-0.0276884978073302	-0.0360240889529909	-0.0538870144152691	-0.0415774930607337	-0.0408589501427928	-0.0352812741898924	-0.0271847152059826	-0.0361767290082937	-0.0336301343826848	-0.0354670165560244	-0.0472093080336128	-0.0546443357241084	-0.0505744316893082	-0.0651679591420986	-0.0499059411404725	-0.0291436275464763	-0.034207270751842	-0.00911431456194354	-0.0560518253416425	-0.0403693767737432	-0.038505054042114	-0.00705687713442035	-0.0285971540441599	-0.0374091136043018	-0.0237901308898673	-0.0277989522076896	-0.0273735456127444	-0.0191701034626268	-0.0264354021700491	-0.00414051572289566	-0.0403101239806446	-0.00814488358071225	0.0184340207438648	-0.00944788545071227	0.00377143208140272	-0.0311216896121576	-0.0430153626272303	-0.0240605410505924	-0.0274856202672009	-0.00952499841388406
-0.0324419069425098	-0.0396227781414088	-0.0593209302987172	-0.0209453918878015	-0.106475359725293	-0.0681452604024654	-0.0555189692330276	-0.0271953998370391	-0.0675225294282117	-0.0511595868560218	-0.0346629427837604	-0.0466736551756849	-0.053049845933091	-0.0730584080816002	-0.0436353660090374	-0.0507451466214023	-0.0236615015010067	-0.0427237660573304	-0.0573125960169002	-0.0258398017380946	-0.0275574125047081	-0.0820924656057307	-0.0884931516218284	-0.0793765927930428	-0.0379818182589075	-0.0856805545232084	-0.0471949576071185	-0.0457615769937091	-0.0483349467557932	-0.0696380621078277	-0.00858646652383936	-0.0715693284186846	-0.0474384582856289	-0.0824711764655674	-0.00371761651153335	-0.0453492165606386	-0.0372601642083387	-0.0197259299519595	-0.0297454860053819	-0.0205321630647318	0.0787511746588962	-0.0284255608236491	-0.0981341556887882	-0.0377164007447292	-0.0325192984962558	-0.082991176897691	-0.0587298793785082	-0.0852688000729984	0.0342080885850149	-0.010542996128647
-0.0501721328500845	-0.0651703772843877	-0.100783524399756	-0.0586845809966822	-0.124060604506548	-0.0730197750031389	-0.0528617431503226	-0.0564126376471752	-0.061259931295434	-0.0623120565633302	-0.0754700330252977	-0.0443716800032154	-0.0809229729377184	-0.0990788906997545	-0.0409358450913753	-0.0370682001891128	-0.0499536403785652	-0.0734024442178195	-0.0321383699235155	-0.0223466179345413	-0.0584237020374062	-0.0888884692858217	-0.0846047632479985	-0.0912267430664615	-0.0813872465301684	-0.0536135270210207	-0.0705567767410295	0.0082938830876868	-0.0732715907086286	-0.0783226997596121	-0.0671755592051635	-0.033927291588116	-0.0637181610873683	-0.0976490992830296	-0.00976873215082954	-0.091102091745261	-0.00718662479125339	-0.0597706203259346	-0.0273166774431373	-0.0199179094118112	0.0764325458451828	0.00635486830085826	-0.0564200975859251	-0.0774857250840832	-0.0314256142942316	-0.0884454195984803	-0.0657706307869147	-0.0707484899296656	0.0762159191503143	-0.00281553239743656
-0.0424063950765295	-0.0313758251054135	-0.052701435043907	-0.0224824465205635	-0.0825464080700536	-0.0502979559939833	-0.0404388327590512	-0.0417418938523338	-0.0772381712981414	-0.0328743062832641	0.0169337018049175	-0.0459000381223334	-0.0581325476160995	-0.065600613331163	-0.0152797053115305	-0.0392299543423371	-0.0287890128930551	-0.0177713270807771	-0.0725361424004007	-0.00957235742327484	-0.0360213085475086	-0.0451893786017063	-0.0705922953907268	-0.0832340694956046	-0.0205037733561797	-0.0715449057925879	-0.0334382617250306	-0.0671947558638463	-0.0747275453717249	-0.0766365003937757	-0.0624352796460874	-0.0900723748114798	-0.0692342642487414	-0.0643166630361091	0.00899604327102242	-0.0766486827064049	-0.0573074834250396	-0.0495024765716236	-0.0383837147056834	-0.0497722653778441	0.0269618827518467	-0.0496699043114842	-0.107983393379602	-0.0785164262002673	-0.0183401665875471	-0.0464056232526822	-0.0652185644959032	-0.0679131424040231	-0.0130097951666169	-0.0391581567593148
-0.00787443400306937	-0.0147482398954191	-0.0187744322653414	-0.020179439523535	-0.0659764891503238	-0.0390299012155012	-0.0274554576952732	-0.017474580207162	-0.0318044663737382	-0.0524558152476676	0.00430544401435404	-0.0252353582369535	-0.03008098134872	-0.0496962846012695	-0.0165803298005742	-0.0122618308106034	-0.0202671084184231	-0.0326823121926945	-0.0193617373914757	-0.018456738991408	-0.00613348461840185	-0.0370429492464833	-0.0635243338220969	-0.0547862716185751	-0.00557390089759861	-0.049843530615544	-0.0430399242108576	-0.0370722006256285	-0.0276683603692049	-0.0640586105074958	-0.0275639252014378	-0.0622830618505651	-0.0552381640595822	-0.0144492307388475	-0.0199567107133439	-0.0284934324916219	-0.0433854104257264	-0.0225374937703567	-0.0561392009518989	-0.0187327991869813	-0.00148528098757872	-0.0379954642608376	-0.0934312499269949	-0.0695430827610224	0.00996726338859599	-0.0445483151049759	-0.060813685739035	-0.050184869023836	-0.0193406716353291	-0.0295535891110355
-0.0245974371182	-0.0224617335972957	-0.0436155987986949	-0.0202293929484629	-0.0722577626520202	-0.0306902859200269	-0.0252362533579988	-0.0324261699950705	-0.0644385380239906	-0.038531308257642	0.0135215766643279	-0.0486575852557719	-0.0505079100417294	-0.0590169016819199	-0.0017445959988042	-0.0438697735364875	-0.0203045520973693	-0.0272477251791261	-0.0718624652361517	-0.00293295269420092	-0.031774227292565	-0.0410147916504206	-0.0467746640478798	-0.0691033744082375	-0.01710889521326	-0.0699722556016386	-0.0371240783016908	-0.0567457477333776	-0.0588420214321226	-0.0782869771247702	-0.0542702045997691	-0.0817263409605525	-0.0676300147916932	-0.042205270308598	-0.00213746876264654	-0.0745871365133685	-0.052123933654487	-0.0252952714509802	-0.0342945589309645	-0.0335403332834568	0.0109988048018664	-0.0480381904381564	-0.109196249558004	-0.0602354779134345	-0.00861063128874463	-0.0427304909164556	-0.0564741797057263	-0.0541952800227734	0.00512900474916464	-0.0500668870662345
-0.00604140616040198	-0.0115989942630384	-0.0202862750715514	-0.0228970332159797	-0.0752402824716456	-0.0356539346584112	-0.0207470418148105	-0.0240866522121347	-0.01920491587096	-0.04834943989402	-0.0225513729786902	-0.0377115180468304	-0.05735467716158	-0.048487435627223	-0.0168059034695444	-0.0292160041001017	-0.00725495380142702	-0.0346347923998958	0.00310645067875115	-0.0399852456242546	-0.0204221897677376	-0.0376840829927312	-0.0707341108577818	-0.0453352619098443	-0.0365854527280846	-0.0425496286836243	-0.0425174676977211	-0.025769953229916	-0.0525306250371574	-0.0465823187666192	-0.0209688360399846	-0.0631339323194906	-0.0480189743654581	-0.037049807431083	-0.0361803359090068	-0.0313137432002629	-0.0442872173181318	-0.00673372525995156	-0.0328954243180925	0.000744272030478246	-0.0059319752332842	-0.0379196996788575	-0.0836727637740088	-0.0288007363479785	-0.0143239289421804	-0.0678782787229544	-0.0457366780663869	-0.0511881760867922	-0.00505288901990179	-0.0210373667794739
-0.00370470753046073	-0.00514465480750548	-0.00265111991488837	0.00531796007945596	-0.0238484749480162	-0.0400755234025881	-0.0445217882178747	-0.018422705733139	0.0291428411692594	-0.0498332383196912	-0.047839416602863	-0.0298061186673583	0.0129708472144915	-0.0170579090473165	-0.0172366693177943	-0.0353429225944132	-0.0147031055825347	-0.0373293319985337	-0.0371151594287317	-0.0452259527837052	-0.0359263035309284	-0.00595835602438185	-0.0410742294216394	-0.0248730370305592	-0.0141258921484358	-0.0188250129899908	-0.0413078158353914	-0.0365411353095423	-0.0412786606650802	0.038143501906563	-0.0335737659038941	-0.0719842594588356	0.0217243600634506	-0.0245794836157097	-0.0467800323790267	-0.0458165354180386	-0.00181286553298374	-0.0109851596546991	0.0188569719198323	-0.0100144671692392	0.0753876311694493	0.165487774351484	0.17599616344073	0.114599460591966	-0.0651190581666438	-0.0280752715076272	0.130766044572549	-0.0160480276733817	0.131851520308301	0.0816008657259194
0.0113111193494398	-0.0366931430103652	-0.0271077192854676	-0.015999921947976	-0.0342850703998416	-0.0379985327955658	-0.0508589064773163	-0.0417746653857783	0.011312821656994	-0.0545040722187475	-0.0664315191746024	0.0136568314260489	-0.023811693249105	-0.0290721900001139	-0.01162144953575	-0.00454557425233596	-0.0217306975163079	-0.0453512180868356	0.0388739420634943	-0.0249818976787466	-0.0221916867955208	-0.0317317872334198	-0.052497337360517	-0.0180948398792237	0.00457227485166809	-0.0100708555697795	-0.038924438414075	-0.00428129095392179	-0.0276359209379328	-0.018708361864937	-0.00846148810881316	-0.0357973604335472	-0.0374281587396721	-0.022799770684821	-0.0330901315160003	0.0192906718450208	0.0027300053745274	-0.038614473093717	-0.0189234466133119	-0.0157881327544646	0.0485075202162837	0.0555143674725412	0.124499938158654	0.025145183634779	-0.0485073856463255	-0.0400434234663186	0.0538113588772721	-0.0241903527959465	0.098197537432745	0.112061370826212
0.0247837934897937	-0.0204594246943048	-0.0106409137104095	-0.000735878040866089	-0.0441128158487886	-0.0482631121650081	-0.0629412457715234	-0.0306315924693087	0.0204793745070317	-0.0660545317726662	-0.0579244429596013	0.0162265987456781	-0.014112554553776	-0.0296207002949984	-0.0440672869707355	0.00292319370280399	-0.0147131387732064	-0.0427774028095107	0.0444447059797991	-0.0423718915279859	-0.0265240842572341	-0.0364468573669875	-0.0589265782777931	-0.0032847393860308	0.0148308034307741	-0.0207618005042119	-0.033005916002724	-0.0159852195944354	-0.0107463863015506	-0.00740966146375704	0.0155675428663996	-0.0387202294844831	-0.0328639416314552	-0.0173087531935524	-0.0383374933316808	-0.00620257334951075	-0.00497565556574239	-0.0269906174954647	-0.0353592903510274	-0.0163671469653227	0.102208255616805	0.0579196684089054	0.0864123128763406	0.040449287622765	-0.0481275751291661	-0.0655096477372731	0.0616354260365822	-0.0202588869008944	0.165898862668416	0.152013944291109
-0.00744330107734923	-0.0399687512579527	-0.0315326280341314	-0.0188037533017363	-0.0361015979966755	-0.049587251834065	-0.0512681239920845	-0.0437017326442443	0.0235445164720195	-0.0403002725137206	-0.0632877809651996	-0.00343493146527301	-0.0466165138023089	-0.043334333840829	-0.00267391401475515	-0.0243680304877026	-0.0146150665766468	-0.031456808441682	0.0352211904367873	-0.00378993214557123	-0.0254280327101825	-0.0208733264572228	-0.032610447634498	-0.0158037904094042	0.00744524947494174	-0.013503857709012	-0.0331712533914736	-0.0133847438862249	-0.0494785931617177	-0.0235233834141715	-0.0144713591125549	-0.0169812724179883	-0.0157548451640884	-0.0254570204648041	-0.0136194261505311	0.0029970579078357	-0.0122417581552239	-0.0509661787691584	-0.0239318883979526	-0.0317469020180754	0.0587025761584532	0.081410983039259	0.13885764084665	0.0907282956701198	-0.0818124109228607	-0.0180162837099151	0.102823219585481	-0.0228022139241314	0.105301594544089	0.085067837969612
-0.0157982490882057	-0.0385613916215109	-0.0335875315395926	-0.0239122222183629	-0.0410692235720304	-0.0636471292123716	-0.0660708046734478	-0.048581141311919	0.0599740285956908	-0.0718083491775995	-0.0909600520826697	-0.0152091219461237	-0.0280904150791644	-0.0501750894209528	-0.00735633791267457	-0.028705615725537	-0.0298223841184973	-0.0522076664660294	0.0380061452707384	-0.0202884816858058	-0.0439259519565686	-0.0178964058152066	-0.0606598422703561	0.0022524443266403	0.020516486665366	-0.00102565117131709	-0.0602958101232811	-0.0130230570323338	-0.0319899072116169	-0.0190713257863687	-0.0287373663007648	-0.03226885895249	-0.00493167575985414	-0.0252924357623803	-0.0353956028033913	0.000207510148879237	-0.0198135449750171	-0.0602680244127645	-0.0416040425591971	-0.0467291794380433	0.127495533303529	0.143751854022058	0.175791512230077	0.151398542219709	-0.077223245961274	-0.00439474262796997	0.157414969228226	-0.0225207197157292	0.110622457713384	0.128672259762451
-0.0522273835496088	-0.0408505284955011	-0.0307860754756989	-0.0423533175943755	-0.0337612760414022	-0.043504596530814	-0.053993687977269	-0.0508988634690618	-0.00932396513907771	-0.0724630663549399	-0.0583141538049401	-0.0475976485619962	-0.0424456508157692	-0.0334100320793028	-0.0618692389095547	-0.0519777483645346	-0.0439816255092324	-0.0522981617723976	-0.0553483652517718	-0.0683002396341612	-0.0556843274345529	0.00198611958266623	-0.050191978432863	-0.0547876837213917	-0.0361276460019387	-0.0164271790432665	-0.0447281733734531	-0.0235196494878361	-0.0707776371183544	0.0152632915115203	-0.0479096704506309	-0.0382365771486781	-0.0229302605302979	-0.0373077267824519	-0.0231701872131291	-0.0469362450934596	-0.0194539416761307	-0.0307624451932308	-0.0327847242660192	-0.0382040988622699	-0.00828088723517739	0.039572195271133	0.0642914753324692	0.191505249013073	-0.0765058147289732	-0.0241074450339363	0.0655433955543307	-0.0255831308666743	0.05376764602797	0.189990022821328
-0.0394683445592082	-0.025507604438923	-0.00368138821134435	-0.032787092339036	0.0472442578068313	-0.0679727173535521	-0.0323231502676395	-0.0176986408357933	0.0457496119836413	-0.0424671948687664	-0.0672503432884626	-0.0512298271459903	-0.0180945116791761	0.0383355275897746	-0.0416398507192922	-0.0576448545928222	-0.0478977688121397	-0.0356823562770346	-0.0308098989995554	-0.0497661461187867	-0.046820029426619	0.0242981020244119	-0.0279557643650169	-0.0613183628305947	-0.054828147110862	-0.00651403734027223	-0.0386104585658234	-0.0325889446183709	-0.103023500506985	0.0579406859238694	-0.0553906451602769	-0.0950570848236519	-0.0267628351630706	-0.0134266871270648	-0.0290155034956539	-0.0379633102312772	0.00521640926522187	-0.030204719373249	-0.0239624849757034	-0.0222466035812671	0.0803394836500066	0.118620040212387	0.399624175018984	0.130502563694424	-0.068931918264301	-0.0510939454213982	0.163409802114111	0.00989081186037974	0.0711155432397223	0.117518945586412
-0.0609206743352884	-0.0497462515035382	-0.0412787445929703	-0.0377330376850151	0.0234367063667193	-0.0582871875131877	0.0496539667476986	-0.0603135565372515	0.037910968029803	-0.050384568925722	-0.0331581576537091	-0.0224435129566455	-0.0652578731102992	-0.00686732686845131	-0.0271901997342053	-0.0405958018173455	-0.0398958197643098	-0.0218478624449026	0.0247490782786592	-0.0201364710552938	-0.0392964930944204	0.0201632965067256	-0.011250676071959	-0.040361123566481	-0.045542832481428	-0.00608767559167142	-0.0631343199065555	-0.0193362295654564	-0.0652536757627792	-0.0136603945306234	-0.0716499813617798	-0.047145675528987	-0.0099054614588406	-0.0250885964576765	-0.0638063213666744	-0.0303613085624731	-0.039196698149535	-0.0603783057418347	-0.0618750031784231	-0.0447259687995629	0.0361842506908116	0.0988809223694106	0.128415412413195	0.511793555018748	0.0440721987205476	0.0190491030083	0.161150238839051	-0.0441402879932034	0.0979979004512347	0.0579932024356086
-0.00951151720443156	-0.0409141352727766	-0.0318652789168622	-0.0396440364883797	0.0195323450519836	-0.0317191936767419	0.0111743720480721	-0.041836680014562	0.0619849254523724	-0.0243758706660511	-0.0675213698964686	-0.0161308406550601	0.00186151327548129	-0.0121871036769952	0.00211968797632692	-0.0140284155181705	-0.0416519064348581	-0.0226935520410353	0.0292329755718628	-0.0111749758464463	-0.044807514328995	0.00368543111435959	-0.0263057395065828	-0.0484434905228613	-0.0403453057082856	-0.00462485103025703	-0.054332583796927	-0.00457978847899425	-0.0765119857948251	0.0452452511051861	-0.0568625808466235	-0.053418391067519	0.0130518922244361	0.00282909562790124	-0.0597840402116792	-0.0280871292091417	-0.0270082835777096	-0.041579254883861	-0.0428900962617438	-0.0351336842139885	0.0483770288534628	0.17637636523794	0.168137594950969	0.344289343833166	0.0168206452781682	0.0132445414338899	0.173306551630969	-0.0178178447369695	0.034799781653739	0.0831461586139041
-0.0672812721855783	-0.0419375156327449	-0.0534580048065287	-0.0682378128623952	-0.0686091937068664	-0.0595636627786346	-0.0519135579498939	-0.0496494908631872	-0.0430142888709932	-0.0448146959956304	-0.0433773730210771	-0.0450601883721766	-0.0886654253615223	-0.0616593311583114	-0.0275164966688557	-0.0419921286895611	-0.014590570224345	-0.040683062754296	-0.0620630677522276	-0.0312823947317944	-0.0609119081709122	-0.043192142658056	-0.0433246551590768	-0.0494734846154643	-0.0456396712070651	-0.0349478524543863	-0.0446852021067814	-0.0279626355600152	-0.0784175240279405	-0.044641234842541	-0.0513033316562083	-0.0832304927858592	-0.049302713858015	-0.073133281408205	0.0182270528858045	-0.0545771678793823	-0.0554791971904803	-0.0679566340336464	-0.0613300092330334	-0.0265733446859991	-0.035167735362174	-0.0388086476531124	-0.0318069526718861	-0.0199603446994319	-0.0751396798222131	-0.0362610174480785	-0.0435263626879168	-0.0797225511966946	-0.0489927234841355	-0.0344979984026144
-0.0602083925209481	-0.0589069183452444	-0.102405883161459	-0.0607955988124295	-0.133587233152966	-0.0754407284360396	-0.0418942539395971	-0.0536478287864829	-0.0604754255913858	-0.065947642711672	-0.0727764360500598	-0.0594374848556374	-0.0874510937146389	-0.0866355737395776	-0.0378729632280842	-0.0576274561254722	-0.0492434484729485	-0.0736491108702119	-0.0577090273204795	-0.0357215013596593	-0.072611287369338	-0.0934140795087538	-0.0708689558412055	-0.100428131981347	-0.0779927858874598	-0.0614097029870298	-0.061086981043922	-0.0107036662555403	-0.0712809266816691	-0.0846278787625919	-0.0578391964875198	-0.0148434070156483	-0.0568253401167567	-0.0844216298658737	-0.0143914701765385	-0.0856976750459027	-0.0159384390784044	-0.0496221417553027	-0.032737148536826	-0.033828225236392	0.0574153277642282	0.020822195062673	-0.0363935748414605	-0.0382568717961312	-0.00359600667540745	-0.0801198860452835	-0.0738735484747606	-0.0593827595338467	0.0759403292724681	0.0196890410079076
-0.0413545543579115	0.00968564668843988	0.0107901548382897	0.0373738764024139	-0.0574255069156491	-0.0156455600741102	0.00463855958689917	-0.000621788875399782	-0.0437136162353594	-0.0338738154948995	-0.0262609840703063	-0.0408572052206877	-0.0474022103309952	-0.0668984749798045	-0.0319502996969446	-0.0429832610117461	0.0320709497248387	-0.0354411069984531	-0.0619148390625498	-0.0261194866413941	-0.0268649656971308	-0.0444606942672011	-0.0418677429624223	-0.0491497230252504	-0.0361762717872874	-0.0495048765877241	-0.0410162325281536	-0.0335006615656586	-0.0291659372534775	-0.051612872228296	-0.00373146082250459	-0.0176576786609024	-0.0510615702206549	-0.0454370031970988	0.0191195531438017	-0.0589219857635173	-0.0137426504611402	-0.0191995471896536	0.000410175883579938	-0.0202080444462901	0.0210280582062595	0.0117216940368382	-0.091697770761703	-0.0415574916940308	0.021746282342266	-0.0533695866076203	-0.0545303531261777	-0.0551128835033744	0.0353346619424314	-0.00474630348987992
-0.031303602737892	-0.0269955912687042	-0.0221144141442478	-0.0179992325842607	-0.067240128363632	-0.0508518686345899	-0.0817439679612388	-0.0325732616556315	-0.0281970909695553	-0.0757631902419339	-0.0555803462178137	-0.0486319983918586	-0.072642678991813	-0.0666389746398915	-0.041786616622943	-0.0349593554236462	-0.0281999092332381	-0.048304638899993	-0.0878975440213683	-0.0362216043395986	-0.0373962383576175	-0.0327890064205449	-0.0624724473054412	-0.0344849569114552	-0.0349280312922339	-0.0201157075009636	-0.0492492618397364	-0.0481815193644237	-0.0647713012665008	-0.0175786619932102	-0.0568123539425489	-0.113710670624621	-0.0401853222705619	-0.059493482355394	0.0190235717636853	-0.0687098701467466	-0.0469438713893212	-0.0566457485240256	-0.0411570789925673	-0.0213580844869595	-0.00399677276689896	-0.03632987910584	-0.0467655029394071	-0.0406534968689693	-0.114476486011986	-0.0675949344735446	-0.0267577466322046	-0.0818166130571876	-0.0727725427523919	-0.0446158064685976
-0.0340616572740311	-0.0265969278756281	-0.0395270857847734	-0.0288457188372597	-0.0583599918295238	-0.0453999715523274	-0.0636969977326084	-0.0336600014365411	-0.0386470634194177	-0.0586419300066993	-0.0462474427941373	-0.0424803310553676	-0.0590568483818867	-0.0431631309614515	-0.037142930850386	-0.0331590642218309	-0.00210738874540783	-0.0425123374286966	-0.0634992029616416	-0.0262415658465097	-0.0417302940066304	-0.0246250952332348	-0.0341122488974426	-0.0498319449276833	-0.0435242138496415	-0.0485806130994396	-0.0251162657421402	-0.037251259242718	-0.0653177407176742	-0.0408050967233611	-0.0365528638589891	-0.0752616387476394	-0.0536070878206079	-0.0549514116558255	0.0205578395724623	-0.0677148294121892	-0.0322492275498676	-0.0255066712372858	-0.00381067063707013	-0.00514912468416751	0.00348910616927148	-0.0204069121729964	-0.0375542391253083	-0.0289845679612333	-0.0810698308967945	-0.0539335481043093	-0.0364452240979873	-0.0457340200522915	-0.00577089035607892	-0.0232537955603587
-0.0206625190629817	-0.0379312064613582	-0.0739632722822729	-0.0462137553119344	-0.110377966236325	-0.0612699664273425	-0.0697805729254015	-0.0415401243200903	-0.0731720022475985	-0.0571130272958675	0.00850086905981924	-0.0536345349054275	-0.051891747020702	-0.0553611837901309	-0.026179513012701	-0.0389306349200057	-0.0433857690543354	-0.058360901344585	-0.0751511448317039	0.00160613912235858	-0.03061764489343	-0.0674055114982405	-0.0603323060836545	-0.0882217233934502	-0.0146350306808443	-0.0744732287291313	-0.039729951881562	-0.0399139603382231	-0.0466334279048209	-0.093549192952183	-0.0332138531125218	-0.0529242204543795	-0.0448901492923642	-0.0241335948422386	-0.00966070368496824	-0.115472546665051	-0.0445242062840946	-0.0256354772128883	-0.0314259389026192	-0.0349701371683771	0.0436179947163664	0.00876031530727144	-0.0809008087197593	-0.0979878723230299	0.00395533014143649	-0.0420424221372937	-0.0865622798159072	-0.0516088641079259	0.0335308653966168	-0.0292558084793273
-0.0277597112127458	-0.0503843890647067	-0.0346750595993862	0.00354292646985578	-0.0937874509478522	-0.042497281052543	-0.0726640658697628	-0.0505601414655091	-0.0392866104480282	-0.0847470466329845	-0.049405654364891	-0.0448417812392266	-0.0741186244544246	-0.0789686831584908	-0.0503167068514768	-0.029045554186511	-0.0179639312309354	-0.0685393232693336	-0.077243598956449	-0.0377583167053257	-0.0342833286348204	-0.0662999091356428	-0.0664819967782592	-0.058461846059255	-0.0124649455942602	-0.00916341455027606	-0.0576788476418155	-0.0435263724817289	-0.0796961019250611	-0.0225736011663117	-0.0591632904062909	-0.0950344810516689	-0.0259794134663638	-0.0493193712517951	-0.0208572684701369	-0.0667497250040262	-0.0108331411276213	-0.0444396596164276	-0.00430665658063765	-0.028146550681882	-0.00619205688535524	-0.030235109960524	-0.067415991994202	-0.0367567332104353	-0.102796041120168	-0.0707469893714737	-0.0439876969726498	-0.0732774454477031	-0.0329918433399117	-0.0149970008337877
-0.0227501417633063	-0.027360468516636	-0.0315000013443703	-0.0172348201686602	-0.0867548463938213	-0.0543667208086382	-0.0668788795246987	-0.0276047405560355	-0.0314615884408426	-0.0671891250236556	-0.0495015382472072	-0.0532957194383474	-0.0436792375870465	-0.0565726805755078	-0.0204266618694085	-0.0355078232949915	-0.0409299419466085	-0.0574321173554224	-0.0524775955974901	-0.00179298650497152	-0.0252621667761901	-0.0534433305770673	-0.062545394217116	-0.0747103036114641	-0.0420791714205866	-0.0577101032022263	-0.0482882435261805	-0.0465418834328581	-0.0568331183815558	-0.0606745564459937	-0.0471974185500083	-0.0858144766166136	-0.0563020329808023	-0.0816913384157585	-0.0165999109284757	-0.0779445755869075	-0.0386229907600655	-0.0210603576946141	-0.0306606247850252	-0.0242835223021539	0.0181664847631936	-0.0357721339553175	-0.0905771594989175	-0.0685044182499676	-0.0756362128004492	-0.0866637664407732	-0.0577482313937935	-0.0479499633577208	0.00939168990820195	-0.0193897027497983
-0.0559605894754056	-0.0251821745084535	-0.051987403786229	-0.0494813966948872	-0.052633687325155	-0.0698117396124411	-0.0553043496875294	-0.0325837675403675	-0.0718611664648312	-0.0274161339554812	-0.0218945255929419	-0.0469938723364433	-0.0137632715995375	-0.0411509538650653	-0.0502048873137808	-0.0382574823306864	-0.0346953028382225	-0.0290010707681144	-0.00994199416124876	-0.0499974460003484	-0.068937723574745	-0.060894539971432	-0.0627876660780703	-0.0466921625015454	-0.0489197638123784	-0.0595317821969075	-0.0772438962721361	-0.0317853278429623	0.00777525216231111	-0.067293415601011	-0.0364058735275361	0.0309501093708801	-0.0571742949587787	-0.069786216346936	-0.0137642170774415	-0.0682913438203514	-0.0500607650523216	-0.0513539131313062	-0.0407343333391318	-0.0161218574090888	-0.00752374236465114	-0.0103009870382878	-0.00931260484994262	-0.04425395477526	0.0397876957237727	-0.0695105872692314	-0.0538659705410579	-0.036478347523044	0.0518896658138445	0.0226318908996154
-0.0416321943919778	-0.0446473039223968	-0.0498439562123837	-0.0266258809616777	-0.0808995500132408	-0.0558762076431321	-0.086903795260533	-0.0403837570182947	-0.0677357377988558	-0.0439010272515072	-0.00255128838977966	-0.0473184816407296	-0.0563684711783095	-0.0581798630267292	-0.0423546230944967	-0.0389583471133943	-0.0487824701914651	-0.0367863655323609	-0.0763082227269688	-0.00181787365009863	-0.0312187080985233	-0.0521848924645451	-0.0648680544645533	-0.0898326901676121	-0.0189456328989025	-0.0698839085500701	-0.0283722741235772	-0.067455882920843	-0.0680986842833389	-0.075146897237233	-0.0583287793511097	-0.0966336691074637	-0.0634101618773511	-0.0566604720627663	-0.0063802255767811	-0.0712978669835374	-0.0498032368847164	-0.0391674004655377	-0.0481147597819658	-0.0263372769762266	0.0387856898254141	-0.0478165075152677	-0.105579106743034	-0.0798062088952174	-0.0479184795005351	-0.0567868057381493	-0.0626657703116908	-0.065893726033791	-0.00127943830189455	-0.0256165597193148
-0.0295916362220627	-0.0273659652123471	-0.0288735741210586	-0.0273992643433854	-0.0560747249177541	-0.0390799835605606	-0.0428057787623014	-0.024145987526563	-0.0426308313143879	-0.0421770789996864	-0.0362397329553806	-0.0307137309721906	-0.0514699322244327	-0.0516595408047281	-0.0360426766900084	-0.0196079795724329	-0.00413380563477348	-0.0326371509932563	-0.0365737761534674	-0.0302058731945997	-0.0236903040008872	-0.036611188427028	-0.0518912177107182	-0.0342766305765262	-0.033721976979485	-0.0327130334650608	-0.0461996051367838	-0.0348733875157852	-0.0407256238280144	-0.0470605565024625	-0.0261299258604983	-0.0492444513662229	-0.0345112565015436	-0.043303729494143	-0.0139644616306703	-0.0325579671425313	-0.036497686242239	-0.0323071526939495	-0.037944786064414	-0.0274859166661902	-0.00701893889621638	-0.0278152360456989	-0.0315981026605986	-0.0277848354798119	-0.0404939360912964	-0.0490452522155326	-0.0456152859720566	-0.0493241936302066	0.000703126540992405	-0.018484337334227
-0.0273350509866416	-0.054945285441295	-0.0586062315319959	-0.0267851122140772	-0.103752289077901	-0.0653787629551792	-0.0737049756570122	-0.0591654490717893	-0.0423596283871423	-0.072972951746644	-0.0660757763214429	-0.0391624719302051	-0.0903312023772695	-0.0849109247738549	-0.0711195187541101	-0.0209761622222131	-0.0166605557386206	-0.0679291692644051	-0.043585280150877	-0.0461924436257152	-0.0228197144077471	-0.0672995803963255	-0.0804969099125088	-0.0833729746909191	-0.0502351240974296	-0.0440180853282115	-0.0563276064807146	-0.0464315090442206	-0.0756626779695466	-0.0557594760662435	-0.0452629867897636	-0.0707069060401315	-0.0446731218781326	-0.0451004326760893	-0.0240821756638252	-0.0535640359663929	-0.00705499948119712	-0.0543375443824067	-0.0112697668729817	-0.0390086638147486	0.0294129105456994	-0.0306592172001371	-0.0477273210588638	-0.0558319137716492	-0.0682136791099276	-0.0872565081522722	-0.0568393654081968	-0.0705464884181552	-0.0255411475203662	-0.0311658819091775
-0.0518804096847618	-0.0426489883932881	-0.0246189230335416	-0.00441691946654176	-0.0824541672955548	-0.048089732883988	-0.0690451300003066	-0.0509963566113399	-0.0338533087134972	-0.0624426773834097	-0.0244926606022269	-0.0352124194662709	-0.0646530725354611	-0.0645766072798878	-0.0842299838788649	-0.0188589296362879	-0.040986223964747	-0.0698680488204358	-0.0660581577056614	-0.0488292326584858	-0.0244199167336289	-0.0537562638351851	-0.0672389664108559	-0.0687518917101202	-0.012084169946643	-0.0608990875712518	-0.0402517371479904	-0.0489573413669246	-0.0654081228158137	-0.0604242399200811	-0.0521681430021811	-0.0676883801245265	-0.0544360923598498	-0.0145355315813719	-0.0402428888608963	-0.065229191335143	-0.0244580452404589	-0.0549490685205809	-0.0321801174791683	-0.0554911614235026	-0.036633838013399	-0.0251271934440168	-0.0335400884877645	-0.0562579922265148	-0.0475246422915808	-0.04506414822842	-0.0460970252035963	-0.0451789309981219	-0.0530416370866207	-0.0574913017834213
-0.00717138097004547	-0.0306092753268764	-0.040456796365935	-0.038451815632901	-0.0493167657794104	-0.062375502151758	-0.0526047982787602	-0.0232505305540507	-0.049198886733546	-0.0262909010143104	-0.0167911225063141	-0.024735273362882	-0.0139446085692579	-0.0257588712293785	-0.062706231125117	-0.0112942394276148	0.00654872780618231	-0.00641205533855542	0.0121126063786127	-0.0641090159337583	-0.0232584768475818	-0.0596015271659589	-0.0758445675366483	-0.0594391985340624	-0.0448113775106021	-0.0541671344578758	-0.0708247650339521	-0.0256036335192591	-0.0115702452114885	-0.0429986719352465	-0.0141142648214404	0.0282464678026153	-0.0341552252896339	-0.0488065962468273	-0.00594189651150171	-0.0150958371054418	-0.0388454283320213	-0.00466782310753581	-0.0253432516493975	0.00730945588176564	0.0155174564253675	-0.0471032067864017	-0.0785070505395564	-0.0800923033752343	0.0459739578966	-0.0943090762322127	-0.0884262298266155	-0.0252302283203379	0.0125370056455797	-0.0255643928031548
-0.0285227851815641	-0.0572410847191713	-0.0632503656069844	-0.0681349873212664	-0.086485910841326	-0.0584686083736346	-0.00687727850799614	-0.0622466143533122	-0.0665503474229147	-0.0517979698688237	-0.0511953023372199	-0.0264435588050684	-0.076848503400588	-0.0758941708024055	-0.00621013916699059	0.00985195152543294	-0.0121782633865792	-0.0574936327310216	-0.0301482096753235	-0.00669355360801897	-0.0181412031113816	-0.070385695162325	-0.0496149618768084	-0.0605956915904013	-0.0463566533096197	-0.0523477232407939	-0.0633251267932927	-0.0382041657342888	-0.0694155592745073	-0.068780767283698	-0.0643252446267273	-0.0427091013077232	-0.047972719287031	-0.0684417283926459	-0.0350941678460882	-0.0576288472270474	-0.0434710665060058	-0.0386293587208421	-0.0499040981919598	-0.02134537153557	-0.0248020244456684	-0.0455230353735586	-0.0764280913896042	-0.0431247982442949	-0.00974361784064509	-0.0628672880432019	-0.0675867403941795	-0.0686337252912756	-0.00335475226928191	-0.0548522860305798
-0.00158113575410716	-0.0267559975612441	-0.0287918587310867	-0.012209873958672	-0.053944291052781	-0.0261099273110908	-0.0151289130287884	-0.0276464129681017	-0.0257062235152518	-0.0481095803183951	-0.0329711165746048	-0.0095457087241901	-0.0336935261187605	-0.0434154246580403	-0.0202625903684103	-0.00671385296835047	-0.00117017543018269	-0.0362626988759127	-0.0327910091394022	-0.0171223078019359	-0.00716025473550191	-0.0397772555991291	-0.0356399075648417	-0.0280780979117841	-0.000978799571236257	-0.00928509182247627	-0.032216149945394	-0.0206310013622225	-0.0284035779788816	-0.0200046852973975	-0.0216071335039716	-0.0393103643002679	-0.0210478558947265	-0.0266396203655348	-0.011073367084996	-0.0257807732272018	-0.0180627961761422	-0.0218279605310466	-0.00868572509158207	-0.0254807338761898	-0.0019488400970453	-0.0247532865151882	-0.0442622658785615	-0.0468123433221533	-0.0431971893023448	-0.0357633533288985	-0.0344365601729361	-0.0439890106130511	-0.0238152110717975	-0.00753843291688879
-0.0458778813874456	-0.0443096511125257	-0.0331107475151036	-0.0210426226135322	-0.0624584229590815	-0.0459322171510303	-0.00846187008497334	-0.0667090094337757	-0.0265126230279412	-0.0578612119156047	-0.0460837456816959	-0.0189125857740642	-0.0852252034956487	-0.0770290280466411	-0.0328847279514005	-0.00997236247680288	0.00863539525763546	-0.0704071110186775	-0.00659762807748651	-0.0280033501423154	-0.0210926548706266	-0.0561907985446416	-0.0439256005076319	-0.0560184560966119	-0.0293097765360249	-0.0427512330555394	-0.0621327613601373	-0.014865336123733	-0.0705754314503138	-0.0454522094980294	-0.0514755932869473	-0.0503615481124078	-0.0456294728639681	-0.0294395384057867	-0.0433035075448478	-0.0311242699450128	-0.00187176999816186	-0.0372184059504306	-0.0190393080046997	-0.0424677478389367	-0.0263192882109366	-0.0441949293406258	-0.0467270727307651	-0.0523777823422913	-0.03530986434281	-0.0284385743245009	-0.0502862227153583	-0.0780687337510021	-0.0595060939564495	-0.0480040842757544
-0.0142455419251408	-0.0193663486638747	-0.0326046765994855	-0.0272941133089623	-0.0830460416254241	-0.0689782559894371	-0.0471980446741807	-0.0260527917233194	-0.0454729179007571	-0.0379449570918111	-0.0102040248912673	-0.0357409996629153	-0.0599411634360423	-0.0631967784456035	-0.0326869410072605	-0.026073346453022	-0.0239827143871947	-0.0278791768312916	-0.0219183460640242	-0.0418881557120016	-0.0153985720474033	-0.0502205521044427	-0.0844637864250545	-0.0773377077760715	-0.0114022971072394	-0.0567251710773143	-0.0372143543843805	-0.0511988238519074	-0.0574124595794621	-0.0610078918958928	-0.0173660096230878	-0.0897224728656327	-0.0513632580001006	-0.0491805937245906	-0.00779416991945532	-0.017633097271308	-0.0417934263360329	-0.032545278230372	-0.0581231736713797	-0.0293586224004325	-0.0144951965835198	-0.0509580974137867	-0.0902428229156347	-0.0702987432461872	-0.00547437131951436	-0.0572344533348172	-0.0746069633999319	-0.0777204370446101	-0.0105081340701636	-0.0143994979946543
-0.00251723961591287	-0.0365910735081658	-0.0297722009056406	-0.00387236927258276	-0.0846160846048522	-0.0574458999988432	-0.0201438527339629	-0.0331690653341195	-0.0263664636579243	-0.0735954516994201	-0.0422322681280024	0.000585446777796802	-0.0726360713471152	-0.0758177252578743	-0.0163952274244807	0.00100248201260494	-4.96089119234418e-05	-0.0702135634627887	-0.0268131987514022	-0.0214553570450924	-0.022577075840578	-0.0725651035573722	-0.0544617616982051	-0.0558973056138196	0.0136837525720907	0.00280266954146505	-0.0506054302452503	-0.0252339274934954	-0.0503266285831138	-0.0290083927437491	-0.0256445958787517	-0.0627909579455928	-0.0213530504297155	-0.0223001674408627	-0.0210832751720356	-0.017047589514249	-0.00051608922499327	-0.0274675864412384	-0.0160414738230999	-0.0414883770946828	-0.0156419637808116	-0.0515745003751271	-0.0714258970589486	-0.0657033803731243	-0.0522530911049728	-0.0427988965232408	-0.0572623978512205	-0.0735144352482925	-0.0622496895866182	-0.0465362564410088
0.00987158438726748	0.00747827693726195	0.0102060766090109	-0.00340558606202194	-0.0578740597830947	-0.0424524948852915	-0.0205167944006743	-0.00606280665929125	-0.0273356524109006	-0.0236890975869376	0.0116508490153947	-0.0274578795218698	-0.0164462317931015	-0.0227052851929861	-0.00251750068169913	-0.0191957759838971	0.0181741572759119	-0.0168407264403067	0.00094668412195322	-0.00861443552077523	-0.012746442014513	-0.0369093585711715	-0.0605898999724435	-0.0673812051331357	-0.0483146735931188	-0.0583783773944682	-0.0532963179146558	-0.0267551692653344	-0.00865748983571502	-0.0477196780666187	-0.0118655144117092	0.0173685568353363	-0.0332248566532313	-0.0535545602844151	-0.0148015610875922	-0.0566337091910123	-0.0259770110050269	-0.0255826617155635	-0.0133527292704552	0.0112576921511326	-0.0126901752623065	-0.0254087739022613	-0.0489614420480908	-0.0376276050785795	0.0605781876907804	-0.0709911119473202	-0.0567989432664407	-0.0154378870363694	0.0486337810985417	-0.0101351557719562
-0.0373141278016385	-0.03530069770058	-0.0363620952053086	-0.0612143626856022	-0.0733098207713331	-0.0550910094180132	-0.0232568429325315	-0.0525569804936744	-0.0396084304291314	-0.0606106951185308	-0.0724724639278591	-0.0202757819440856	-0.0693773503740757	-0.0748846345420262	-0.0126620881896621	-0.00742119950691777	-0.0184517871256335	-0.0709982192657821	-0.0584206418255559	-0.0293555198277074	-0.0325303073533097	-0.0630438157378303	-0.0352165773952993	-0.066017920289177	-0.0373607201696093	-0.0280032626004453	-0.053392856038506	-0.0271844023507105	-0.0602462914213844	-0.0315622584648893	-0.0661494688185649	-0.0636963551161806	-0.0308413144052108	-0.0755707062295265	-0.0177253219126342	-0.0545817922675867	-0.0632863956918603	-0.0500024970710509	-0.0679769128335108	-0.0448997559047214	-0.0749324002661376	-0.0254163984821184	-0.0380370450439913	-0.07156826760267	-0.0642379302609871	-0.0514986524708245	-0.0510764202743716	-0.072128557268625	-0.0570657623886579	0.00341099332159695
-0.0103995341528638	-0.00462085585459866	-0.00644760808438936	0.0110785466388815	-0.0631073298027559	-0.0786205095563476	0.0198723074148505	-0.00266430430882041	-0.00249522011983649	-0.0229740872980016	-0.00566829613096864	-0.0353249503901418	-0.0129959561314227	-0.039461129229091	-0.0026681708783612	-0.0383762998916669	-0.00997351458434895	-0.0334757664466369	0.0452733238846198	-0.0336297849826572	-0.0455780052345702	-0.0739790575165219	-0.103282282803881	-0.0917153702363922	-0.0675203694713443	-0.0805025888685515	-0.100388358179326	0.00158584844575928	-0.00197318192371458	-0.0958955660620321	-0.0320137002611979	0.126094943647978	-0.0426019924425719	-0.0836960880031839	-0.0317179421920249	-0.0568466457485403	-0.00641142235520917	-0.0322649932807415	0.0264433565603351	-0.00168823947436652	0.0570052059682922	-0.0451969313243776	-0.090102754884883	-0.0415949030062171	0.174066368836844	-0.0679827876598617	-0.068268342352317	-0.0286274398204662	0.0795915288031896	-0.0271032395629831
-0.0325257088017212	-0.024817138163488	-0.0229490127999756	-0.00428884464049036	-0.10287548415377	-0.0616615769241448	-0.0849958369563882	-0.0149419584886892	-0.0379233362499779	-0.0777653423155376	-0.0660543343327889	-0.047578513212881	-0.0519918225536188	-0.0676189533456141	-0.0331198894764359	-0.0281459744497827	-0.0302916401202523	-0.060892963339192	-0.0296907719115347	-0.0198152297396026	-0.0189096496141714	-0.0619967449550141	-0.0822917363306663	-0.081410443511053	-0.042694659313847	-0.0658086565354931	-0.0469016120201304	-0.0443566019760771	-0.0521223903420159	-0.076124910635063	-0.0208426995843275	-0.0922557648085898	-0.0539264436607095	-0.0814107018405732	-0.0120398151104512	-0.0364932469785162	-0.0315525577192644	-0.0265601904179029	-0.041152754608012	-0.0178926226416874	0.0401709231815815	-0.032776727383565	-0.096138020745403	-0.0855545095989786	-0.0830590071168833	-0.102447395621935	-0.0553556259178077	-0.066874309917721	-0.0257044489837908	-0.0222229767783239
-0.00668223337287832	-0.018035252454529	-0.0249244478685829	-0.0317066481128154	-0.119071329285269	-0.0653029185788639	-0.0785110608964581	-0.024088778097887	-0.0594135699076965	-0.100161933626487	-0.0707022128493733	-0.033595987088003	-0.0531453822304735	-0.0913025799520356	-0.0576995207277515	-0.037976176106587	-0.0268163340487799	-0.0776502030759622	-0.0568937228944583	-0.0612033353668947	-0.0119447241170503	-0.0809353324726376	-0.111138508545859	-0.00783098029957188	0.00215087988317237	-0.051943523891324	-0.0852392129095273	-0.0854177897774478	-0.0246246673084856	-0.0575255079204299	-0.0178112111300018	-0.056373604322481	-0.0420205015169685	-0.064879965573131	-0.0461576754627768	-0.037103329682283	-0.0548672711483139	-0.0177224483019156	-0.0369954396132766	-0.0347464812437485	-0.000689637757801711	-0.0464246717180391	-0.0655635769781677	-0.00114885843135128	-0.0612192543514078	-0.0915139390128494	-0.0469131706311349	-0.0817308735937406	-0.0135954176209591	-0.0393534663328712
0.0185124064945013	-0.0380938059052006	-0.0621064696270004	-0.0614388893618244	-0.101593537018823	-0.0954909941847868	-0.0934164790760283	-0.0215861029416422	-0.0464995873973175	-0.0566221712792958	-0.0519669136469504	0.00454070409401216	0.000795280984612021	-0.0536278051217023	-0.003224026645076	-0.00395056658832355	-0.0301794410095398	-0.0405433010371837	0.0522451747270318	-0.0100396011576279	-0.00575928758598987	-0.107676391380503	-0.106953461112827	-0.0509872123982032	-0.0350676600139386	-0.0214610874863735	-0.126266882987292	-0.0018045029367264	0.00757902785576265	-0.0634083856073689	-0.0357565667905946	0.087833213204584	-0.0457966848752291	-0.100846744111244	-0.0409721836388827	0.0068688999495925	-0.0513480076340892	-0.0375486908864884	-0.0230828792069363	-0.0259574857965154	0.0197394372385506	-0.0482725871047273	-0.0381781839133812	-0.0705343235091731	0.0894779415189518	-0.112655500857985	-0.0884796110219513	-0.0550158355730784	0.0215341916789609	-0.0154374637813018
-0.0057206670225269	-0.0529558722409751	-0.0528497476890962	-0.0504869069954868	-0.106421678763458	-0.0709492833070086	-0.0695472251908217	-0.0401094397733203	-0.0215422221704991	-0.087452561718468	-0.0887640034092001	0.0116284567125695	-0.0712119407568448	-0.104280222194213	0.0051488425640426	0.00501164708758123	-0.0239390980016813	-0.0709830315062741	0.0178166440126473	0.0204546101936375	0.0197547714599587	-0.0880891334032397	-0.0800736696050914	-0.0301266723192756	-0.0246602960477701	-0.00681811542386195	-0.100781348136899	-0.00694003832937867	-0.0769984541057626	-0.0560294462445491	-0.0536086000927097	-0.0488655611957828	-0.0455526399172478	-0.0809487580614081	-0.0479277247372956	-0.00967874229544711	-0.0428980902391462	-0.0525933128470184	-0.0376613971712652	-0.0455989549395801	-0.0152118316668413	-0.0494634109541475	-0.0331892943524618	-0.0340630469383362	-0.0477058785484101	-0.0790596333994696	-0.0318369067517906	-0.107019408284133	-0.0336716081621994	-0.0466370269087542
-0.0550645915802042	-0.0350420492165537	-0.0472425256376771	-0.0575310719155899	-0.0666353477312805	-0.0601647205452096	0.0140152976571442	-0.0557525403084192	-0.0627010342340673	-0.0716266443482857	-0.063025355952429	-0.0176244600802111	-0.0503345083873297	-0.0788153684759668	-0.00594792187514983	-0.00916215094608983	-0.0495828488607473	-0.077709357568311	-0.0273395272104575	-0.0229535520384823	-0.0339369545459298	-0.0728483994337139	-0.0723345962340293	-0.0545678621350574	-0.0622117506340267	-0.0393915207167944	-0.0889164127809043	-0.0270732903338659	-0.056584505166775	-0.0791553324606049	-0.0638231485468409	0.0140836451563153	-0.0542127551380358	-0.0771754580308012	-0.0779734007541973	-0.0327398747001674	-0.0312617772791692	-0.0452999097793958	-0.0371926950237537	-0.0346098558223676	-0.0247568936699246	-0.0604703602666682	-0.00480969915339444	-0.032030176577256	0.0297458428682509	-0.0208887740382921	0.00186443422927362	-0.0844281667319303	-0.0093485940562818	-0.0223442032917438
-0.022075712426677	-0.0264898574607195	-0.0191821763303871	-0.0189926097050866	-0.0985016340712939	-0.0199457879687889	-0.069121823309689	-0.0214798358831244	-0.036393755816527	-0.0720751148032948	-0.0580890196829945	-0.0181910749842841	-0.0608813456184769	-0.085539003336246	-0.0505961778137908	-0.0130159567295236	-0.010274625257314	-0.0654003489728801	-0.075493618132452	-0.0115738283310729	0.0185365657746852	-0.0677950394904844	-0.0648025254268832	-0.0414400104747285	-0.0371520333314034	-0.0248667174772068	-0.0372595496880833	-0.0697512380275696	-0.0662563765594435	-0.00992682734833811	-0.0200813477321759	-0.112384092054551	-0.00737541517623204	-0.0500734048961628	-0.0146478233475828	-0.0230259679723502	-0.0229970687131248	-0.0189877886413945	-0.0272134674332533	-0.0292392802306639	-0.0369169291233996	-0.0569042666407557	-0.0827490316351882	-0.0428004237253318	-0.112910236894018	-0.0852123995142364	-0.0304047336343054	-0.0709916219829065	-0.0507942872605574	-0.078355959650383
-0.0264494311798226	-0.0204645155268493	-0.0451141977312139	-0.0582015683044849	-0.0555429773059131	-0.0373897254952614	-0.0123836600236026	-0.0238324583147987	-0.0556188264010319	-0.0147514677839351	0.0087782476299421	-0.0376130003907224	0.00706119304434404	-0.042025134844911	-0.0464305849607222	-0.0336132850198988	-0.0717081778410221	-0.0334606183503054	0.00226076007570082	-0.0436407397089767	-0.0464719310162852	-0.0830039647801917	-0.0652112454759557	-0.00989319863152147	-0.0407554269409524	-0.0208115609455688	-0.0655782729664689	-0.00616839740731255	0.0518523712006574	-0.0322212835200691	-0.0361347856784164	0.0970634128153518	0.0529672132310772	-0.0465263884460604	-0.0217353345311431	-0.0223123681667742	-0.0211708310321407	-0.0427672490569267	-0.0214552434433475	-0.0194653125565047	-0.0575097851315024	-0.0428687581474184	-0.0302991332910245	-0.0541097203625435	0.0859095728049785	-0.0247613895302461	-0.0435646577254974	-0.0205775868564326	-0.0280885485710383	-0.0618828501663666
-0.026547083963878	-0.0312279142747548	-0.0445628290472718	-0.0569391462592992	-0.0613951051038368	-0.0357263630773389	-0.0587733984656962	-0.0181776770513937	-0.0492933665288278	-0.00946376935307254	-0.00232706605823803	-0.0217386238427244	0.0273736797198882	-0.0401848815094982	-0.0180242745122407	-0.0433845805821324	-0.0246788136192374	-0.00251564754702516	-0.00696269231410107	-0.00746426087795272	-0.0420975554698602	-0.0802293243395231	-0.0431703737767784	-0.0422858858344702	-0.0259883813528753	-0.0165946162257102	-0.0564939993679554	-0.0135053070170191	0.0339557590725959	-0.0403824150713161	-0.0355756074116499	0.0411328877701377	-0.0272730115298645	-0.0492267375247828	-0.00153193190810278	-0.0123504199774902	-0.0493189721990714	-0.0476605234898406	-0.03691326399012	-0.0219684461452841	-0.0433219897253144	-0.0688051164160292	-0.035131866722529	-0.0856770522734871	0.0414494547054868	-0.0661009213453123	-0.0932829222745235	-0.0133548947532765	-0.0253916554856362	-0.0408859176805643
0.0207031618515494	-0.00456006468253036	-0.0379629005936682	-0.0386101672688802	-0.0333000668656878	-0.0430820513595231	-0.0860263256737352	-0.00720642265283443	-0.041708637722522	-0.00645603159629376	-8.87879286790307e-05	-0.022332736022083	0.0152755071133765	-0.00659251059792884	-0.027798212037415	-0.0225273005863035	-0.04667923885015	0.00566496667564627	-0.0201534181647608	-0.0383473638478359	-0.036513215038261	-0.0519211468477462	-0.0763651612391816	-0.0234149476503606	-0.035733276823651	-0.0150012399838934	-0.0482219956718631	-0.00378276949878993	0.0365882820163329	-0.0209179516865583	-0.0132511694539645	0.0361748036706602	0.0270434663289114	-0.0811478095529814	0.0198040294723608	-0.0462161178804467	-0.0301440638725424	-0.000387824439970987	-0.0067578837978955	-0.0119690181219113	-0.0139938911930314	-0.0261142929547159	-0.0144622094357317	-0.0181055064201219	0.0123812306475772	-0.0699697452610264	-0.0222190114198458	-0.0168920552516809	-0.00234836419158036	-0.0302626347113793
0.00105722556461304	-0.0358131225772706	-0.03036864136652	-0.0486239373047275	-0.026798174682411	-0.0711432445788396	-0.061729725175842	-0.0373977568383638	-0.0148071652141027	-0.0670930090578726	-0.0920218712378467	-0.0151903887694068	-0.0362949714082156	-0.0460481462832294	0.0375001204600817	-0.0220201064103173	-0.05532375047041	-0.0624743828809324	-0.000442658274996115	0.030532891460765	-0.0249530739316735	-0.0269814566307249	-0.058052538783709	-0.0596943030274678	-0.0470396043806726	0.057936409521711	-0.0713132447025237	0.00422084059227606	-0.080249173103716	0.0250206389166936	-0.0522057064228353	-0.071703515061596	0.00476014253017751	-0.0657266846900968	-0.0288879986252891	-0.0246090778661578	-0.0494867565344836	-0.0562148500191068	-0.0552742214124537	-0.0331358882516767	-0.053106053840472	-0.0334563393049236	0.0484489630949178	-0.0127820759639096	-0.0691150351536735	-0.0606132095208897	0.0473879497412899	-0.0482030147748055	-0.0587010520950076	-0.00942546234670384
-0.0145729517207725	-0.0413117342841362	-0.0715029643487629	-0.0791545633843189	-0.0824253211763698	-0.0632670917937327	-0.0874457799328798	-0.0221648085930851	-0.0508599087561237	-0.00830906459245027	-0.0182290775465407	-0.00743846999875879	0.0085820824725879	-0.0449876360839734	-0.0297911674445321	-0.00924854473050823	-0.0501541003326149	-0.018988181721466	0.0403089034504692	0.000306492369295062	-0.00487343755544654	-0.0997425292437717	-0.0805568097336256	-0.0280461388597429	-0.0336831198061716	-0.0302746531630965	-0.0863707516302147	0.0127606154345914	0.0419037107333705	-0.0767621672064215	-0.0231945960963625	0.0749185295175835	-0.0536913593863023	-0.0620578177430441	-0.0407309105772839	0.0114046223822779	-0.0466978013418428	-0.0515667476206302	-0.034080472042296	-0.0317071625533606	0.0207901978260965	-0.0477076915835604	-0.0656831388782988	-0.0844048300467686	0.0812595508160102	-0.0839346376871236	-0.0938813182879798	-0.0282103772072008	0.040358290403954	-0.0415787365665985
-0.0445971989815156	-0.0492728017664342	-0.0431544388492849	-0.0531039681283436	-0.0322013127901245	-0.0348408494595686	-0.0377524965164543	-0.0513429436422089	-0.0318973550994612	-0.0562607666502577	-0.0706034692057591	-0.0253592650928069	-0.0189139163984385	-0.0599859385099682	-0.000515829222326849	-0.0423407056905144	-0.0441922847224279	-0.0635314816305615	-0.00570761517403316	0.0036200622345856	-0.0407834968640733	-0.0447869106732722	-0.0520919797434728	-0.0439904591386263	-0.0337122740936295	-0.00196339747281467	-0.0540384877095347	-0.00760897390899398	-0.0461747836350644	-0.0341730401200849	-0.0587377959493717	-0.0719598605158288	-0.044242942493959	-0.0270554106137666	-0.0267387435597241	-0.00953291763675071	-0.0395222652296059	-0.0380391465662399	-0.0610066646363066	-0.0330891225826537	-0.0844738956690782	-0.0738607301200482	0.0160358081085543	-0.0082944831769131	-0.069506284336119	-0.0379961568800356	-0.0191724434443289	-0.0358371053973317	-0.0925076408651441	-0.0472744858189279
-0.0469969296703216	-0.0348671603417104	-0.0406990473481609	-0.030533918701267	-0.106596002347459	-0.0364165080543289	-0.0744434172387384	-0.0374921962623158	-0.0551449494913457	-0.0820879289542534	-0.0305575461113364	-0.0404705850665816	-0.0426423404291814	-0.0876802961945022	-0.0623210263448277	-0.0620514608718442	-0.0197819536743596	-0.0528754805964201	-0.0662444867739994	-0.041641555956667	-0.0603724819880582	-0.0784215368560292	-0.0632316699017457	-0.0336524864156475	-0.0146276513949332	-0.0152849372652076	-0.067165877633887	-0.0425761170113269	-0.0322788343135665	-0.0260106880763583	-0.0342025177822969	-0.0109273654788742	-0.0141279665888976	-0.0574442167066966	0.013287686422823	-0.0704132624756813	-0.024935622279388	-0.028529219163462	-0.0220899243631445	-0.0334339990246132	-0.0195859478534146	-0.00526894206480236	-0.0373315333952534	-0.00512271105288528	-0.0271234341639406	-0.0516327905317429	-0.0166230882582663	-0.0766235177961253	0.00577618390129047	-0.00769282579364574
-0.0205099433511641	-0.0144382352542962	-0.0236873376066524	-0.038289308015605	-0.0545265015543101	-0.0244467431328972	-0.0833735842869387	-0.00649646559650759	-0.0514455119963308	-0.0405315207132332	-0.0353549803291703	-0.0396488057222038	-0.0174833861461643	-0.061031222844918	-0.0307138357029511	-0.0387338552095152	-0.0469725629895342	-0.0323008066629277	-0.073593564415833	-0.045025685425495	-0.0471537955423134	-0.05212843455205	-0.0718717088410482	-0.00627465988441661	-0.0318036900044439	0.00249045281018242	-0.0449327096127379	-0.0497199786942975	-0.0110193892079347	5.82633519236261e-05	-0.0165789608245477	-0.0388974111598755	0.0404184547471098	-0.052241585291144	-0.0134784064071206	-0.0585470679113014	-0.0440339648967577	-0.0539952765854479	-0.039302735859515	-0.0259515690948521	-0.020205077285071	-0.00959011516372309	-0.0340538721124827	0.00379252556202346	-0.0809840159988698	-0.0543642703822262	-0.0267182025285017	-0.0385012518941412	-0.00375681171648832	-0.0204590692310071
-0.0253174860220954	-0.0151250731874285	-0.0314447403814605	-0.0436436660094853	-0.0740640722512006	-0.0561749087406337	0.00559502227160098	-0.0606403718210199	-0.0604351360109864	-0.0711557388835347	-0.0826697386585445	-0.0130749512917187	-0.0324189271642059	-0.0874818067689835	-0.0307175399830635	-0.00018987069461385	-0.0414412218016849	-0.0597128463407928	-0.0349554215620381	-0.0593480404016841	-0.0355532876352833	-0.0600187480780579	-0.0655675083149342	-0.0323115397645059	-0.0214114119523108	-0.0537568147485045	-0.0845737424553048	-0.0543339843309794	-0.0263991556401742	-0.0652400530729021	-0.0603588742414379	0.0298054559021248	-0.0341731935075027	-0.0694922153582672	-0.0649664199860405	-0.0471905787671322	-0.0697374172216999	-0.0403788445009849	-0.0437370156134469	-0.0500854335622031	-0.0449541414654978	-0.050089014186133	-0.04790042304126	-0.00479540742487274	0.0577956236306527	-0.0698268173962285	0.00692979927187237	-0.0812464068859553	-0.023932027301384	-0.0353393983496858
-0.0341352948027528	-0.000616594393842615	-0.0079274214390598	-0.0254549825575944	-0.0990955129569136	-0.0583358236592521	-0.0913227351378294	0.00232590822716994	-0.0360228164752253	-0.0892474520840624	-0.0485714351137829	-0.0440404878323222	-0.0610534503872304	-0.0789226224725193	-0.0522557369670032	-0.0437749827587742	-0.0400572945566754	-0.0633496338119203	-0.0609273188391691	-0.0428848884485222	-0.0160911539608512	-0.0755394196913935	-0.102347021635099	-0.0197188263378444	-0.0364162952571476	-0.0265771942354755	-0.0785449357932051	-0.0649684729808036	-0.0590710847015696	-0.0281300598159547	-0.00924229740823066	-0.074905134992786	0.00199039027589517	-0.0625729219655026	-0.0418098133229937	-0.0458922057762984	-0.0665965576113686	-0.0473531994321057	-0.0622756655688722	-0.0241333665831118	-0.0195773577342881	-0.0232262394506605	-0.0718841212485094	-0.0197694754028513	-0.0739419138968026	-0.0867978290457651	-0.0339047813828598	-0.0781450117721897	-0.00407288930985628	-0.0218421678136164
-0.0285141543734406	-0.0130640896974323	-0.0244729871774427	-0.041880040324936	-0.0929303065885059	-0.0729435765487634	-0.0226482761342559	-0.0299057340227621	-0.0505832121715704	-0.088551431187405	-0.0857298803538609	-0.0241533632174349	-0.0492852975250989	-0.0875053678869346	-0.0271171466929516	-0.00453846719526046	-0.0554751185818703	-0.0822883949883593	-0.0639554664898575	-0.0463838969163986	-0.0461122234147514	-0.0768161790706182	-0.0846278662302043	-0.0693472089451618	-0.0520569286701573	-0.017862356267972	-0.076413960439911	-0.0621258369864257	-0.0389852698181925	-0.057274208711348	-0.0412801908111922	-0.0147323407993502	0.000116976159533682	-0.0966968635757844	-0.0129812710707881	-0.0477379260697022	-0.0359912394217134	-0.0351242497178998	-0.0217983514823643	-0.0410828312070556	-0.0206488699435141	-0.0384373148679849	-0.0732913363932987	0.0156716516591152	-0.0233762906278292	-0.0660898089499649	0.0119063904394266	-0.0819220708783351	-0.0203161355917044	-0.0431416875029434
-0.032362883436904	-0.0331558586714556	-0.0136756699493223	-0.0116282631191274	-0.0736049373899312	-0.0216982875186803	-0.0413622568841259	-0.0501819516818245	-0.0518630280846756	-0.0753788722829751	-0.0353838269626755	-0.0144571752691534	-0.0600015358750959	-0.083947969263036	-0.056307458910644	-0.0357963068201643	-0.00121287439207619	-0.038751420491156	-0.055151987086425	-0.0564419331206502	-0.0278055717536336	-0.0408542479114482	-0.0363713169586871	-0.0150037135005544	-0.0121459031677414	-0.0329871791905213	-0.0495285775858671	-0.0448731862280489	-0.0439252332750708	-0.028185262059458	-0.0476653674004251	-0.0570389847661428	-0.00837559238402965	-0.0322154980349697	-0.0290125980084632	-0.0497792201523978	-0.0470968042386043	-0.0463945378299441	-0.0379059196196783	-0.035820523833773	-0.0866686751606231	-0.0160991778765266	-0.0186025315641006	0.0256419222358713	-0.0360593122668596	-0.0453461455284325	-0.0228213233191355	-0.0727494206107886	-0.0329408322267134	-0.0354033914630345
0.0701369900491335	0.0885147603871474	0.110914852794309	0.0951043816507284	-0.0374052919953185	0.0239736939511243	-0.012147987297573	0.0736934109161167	0.050793531810533	-0.0228772965301469	0.00920171521864884	0.0771797129511201	-0.0128838716916992	-0.036397219128664	0.111862592043456	0.0718467381097689	0.114346275629613	-0.0248598639328268	0.0150899150332633	0.12145901637431	0.140694588362846	-0.0209605378751887	-0.00444947911712925	-0.0184427267651868	-0.000775791458731865	0.13456558502144	0.000797504008296556	0.0747205878619254	-0.0471888064479382	0.06471254779298	0.077768879741821	-0.0701672273093736	0.0110998479885214	-0.0177170628179632	0.0499635780654279	0.177201220011443	0.0648934095296983	0.138908136400363	0.0574526308625959	0.102264599199111	-0.044460490312396	-0.0595645847274742	-0.0480010640421046	-0.0437938511085082	-0.0655751880545582	-0.0107219795502633	-0.041476061809717	-0.0432648257816885	-0.0366783286197206	-0.054283822146244
0.0580839706032198	0.0554385773393668	0.0656442243865664	0.0906721836314747	-0.0529988535458632	-0.0433770965390716	-0.0295226201965364	0.0761327741276182	0.0988307578089845	-0.0591939174621886	-0.0538054638841442	0.0894839430545298	-0.048480519012758	-0.0655872253087142	0.117795632768574	0.100234766837735	0.0844274588936014	-0.0622541341092208	0.109391748620664	0.0972787424706551	0.0496863072083893	-0.0500414944240904	-0.0276785291865004	-0.0623432864268242	-0.018784373164084	0.458201497925632	-0.0532334369434609	0.0662393950645156	-0.0985854055134599	0.265551600529377	0.0784537379616476	-0.0851751203197301	0.154480007186006	-0.0411973706114279	0.0289222838161409	0.144036977743751	0.116696608470703	0.0376203850195866	0.0493500110566854	0.0401560908269451	-0.058975592544513	-0.0274110263698271	-0.00441490441332333	-0.0389756762314433	-0.0626352444048052	-0.028655093512867	-0.0375598991969951	-0.0657306662929925	-0.0451923890554777	-0.030359390355132
0.0483570131059144	0.0556755326857672	0.0631681913003888	0.0650163150255187	-0.0567405692225666	0.00929016515588392	-0.00952430288341781	0.0563374401767031	0.0511559263975491	-0.0300813647980392	0.0190609235991875	0.0755370313456612	-0.0613411880498828	-0.0477428526894564	0.0894056424793185	0.121772456959372	0.142557861847568	-0.0193076508025807	0.0762847957959779	0.114269821061301	0.166735907357665	-0.0297910101709978	-0.0201050932685661	-0.0336522392799632	-0.0224459722324788	0.0919259114214692	-0.00160429647206489	0.114126688385316	-0.0497040014221154	0.149295837206379	0.0608343684763634	-0.0555793733711755	0.0604615161458394	-7.04918951673518e-05	0.137325004268199	0.314282760606709	0.23101173078132	0.202527125303772	0.148750711729481	0.130494329391702	0.00158884720986815	-0.0475056552635029	-0.0606550364223752	-0.0362480477564214	-0.0745862171536591	-0.0101536691427454	-0.0388747957240573	-0.0481305554954503	-0.0399605371821164	-0.0442718898475997
0.0646242143968486	0.0863527605808599	0.0850230864498867	0.062188311459025	-0.0674058192864066	-0.00743632948840185	0.0595846117835077	0.135476692032616	0.100855323956661	-0.0600009863104493	-0.0193993282430434	0.0846412433539113	0.000908940308051482	-0.0747738411783253	0.0963692587953581	0.0691563981256268	0.0220669092311704	-0.068260899321647	0.0334574494563185	0.0478025311414962	0.0385357328896324	-0.0817580706525278	-0.076930966752443	-0.0361608473324837	-0.0459348379590064	0.0633953782274271	-0.0874341243780751	0.0431466926818017	-0.00472361070681105	-0.0287266172169144	0.155098353996833	0.0566543865943714	0.0284112854598243	-0.0342607540072281	0.0749597812865115	0.11653104683228	0.100409628502777	0.0825183742407798	0.080115797359874	0.0831335352505551	-0.0208317334987779	-0.0611466666114998	-0.0725249964592914	-0.0643045616062031	0.0685946510754008	-0.00935743116139321	-0.0921625875445628	-0.0766012567799446	-0.0271317534145859	-0.0546492680969261
-0.0392142655253422	-0.0444221281318016	-0.044534017262367	-0.0579498988220757	-0.0359931756342996	-0.0760747507939603	-0.0737287813036626	-0.0597873448876212	-0.0537149311840215	-0.0452743299679108	-0.0759953237071463	-0.0497437564076648	-0.0389271161539734	-0.056402974052307	-0.0248102091847997	-0.0567065511918831	-0.0491207331822322	-0.0511065020793856	-0.0133241062343279	-0.0269587175108075	-0.0556213440247125	-0.0389423776163093	-0.064214396057761	-0.0506195003729881	-0.0354873404186282	0.0185982293948057	-0.0671339851940572	-0.00585803899684615	-0.0802594995263805	-0.00443835629254367	-0.0570815573059181	-0.0648698544003325	-0.0256966441126827	-0.0626772582084169	-0.0511339348101315	-0.0333746562330355	-0.0413406675552584	-0.0520647207386634	-0.0490800340472489	-0.0370929249061081	-0.0410206665223929	-0.0279724448484551	0.0620450040608554	-0.0288369687249951	-0.0829820209538465	-0.0597426764637626	0.0248804192095484	-0.0560932103230615	-0.0587405867675324	-0.00107901551145247
0.154737086622221	0.178035380454481	0.221127077724902	0.191515709319099	-0.0292065037539223	-0.0231997980231248	-0.052040993952815	0.136273498096937	0.186144246812069	-0.0485665054042907	-0.0302158660170763	0.070201471914916	-0.0444079164614257	-0.0373762101483375	0.0496221976673398	0.0600455654979227	0.0767368678875731	-0.0353538572020425	0.172234850749033	0.0225578192982262	0.0991299053283021	-0.0097736516561671	-0.0596430898073532	-0.0323124052559793	-0.0237080385078774	0.182827571028791	-0.0409469469690529	0.0997175113513078	-0.0694678729190646	0.0931891662906679	0.132622123348592	-0.0851005731154273	0.0363490492224259	-0.0184711938017628	0.0922013493275358	0.11689309148632	0.118401179451742	0.0617887883864956	0.0766036553873596	0.0815592280214345	-0.0340113971810517	-0.0425350879675408	-0.0095907659763898	-0.0161094530946786	-0.0606994324679041	-0.0385492216586774	-0.0293237412254063	-0.0599023155377206	-0.0386258789846624	-0.0474652785711127
0.0565065926822432	0.0704997594149901	0.0769697827424991	0.09446834825788	-0.0327861010865459	-0.0381413349332138	-0.0762540509557933	0.0883356648485119	0.135091130276573	-0.0452627447998898	-0.0441499797914274	0.0467245095696479	-0.065381551843905	-0.0489813125382364	0.0413720185000226	0.100338161454233	0.091651367240604	-0.0296126063810115	0.000522210976739735	0.0558286922113485	0.0581056754951866	-0.0304794475510229	-0.0262007101955149	-0.0531715377093001	-0.0429669565220121	0.247947363573008	-0.027341639835658	0.00805577190692769	-0.0869469075327788	0.391995625648332	0.0783426161530436	-0.10595584338432	0.187843969124156	-0.0471664771048955	0.0484694172624341	0.120254319745582	0.0803407038442109	0.0465122998153502	0.0583476082259226	0.0628143097446609	-0.000456771083725605	0.0422987423707381	0.0225816586171186	0.0265971808721199	-0.0996140673905066	-0.019025087747303	0.0146761417074701	-0.0540715850610328	-0.0242719242348009	0.0153585615028893
0.00964915695475107	-0.00318714164912942	-0.0190516648349378	0.00344130945784184	-0.0396501373840698	-0.0731031738760093	-0.108919334520528	-0.0189685695420382	-0.0493358265807227	-0.0639164663195276	-0.0754293503596333	-0.0279429743125701	0.0088519454009025	-0.0417045212299351	-0.0254683742445141	-0.0212171703232229	-0.0512029576743259	-0.0461076063649445	-0.0720372861782327	-0.0320871929411126	-0.017112073021899	-0.036530265811797	-0.0754643593789654	-0.0267661285424083	-0.0271178179816622	-0.0190151064290423	-0.0662879630800388	-0.0377575830899764	-0.0275527290864547	-0.0150776011298954	-0.0211289850297677	-0.0744812496703036	-0.0334038232181209	-0.0622977167133206	-0.0284498177832279	-0.0774891899539637	-0.0373251271386539	-0.0394394593728687	-0.0276788657274653	-0.0260528156195539	0.0273725054579805	-0.0183003980464432	0.00694543108616958	-0.000170295591841436	-0.0819845297243176	-0.0939215271293367	0.0641820169071774	-0.0282537292291041	-0.00385140985733063	0.00859340863060167
0.134899163490362	0.146066062373369	0.163213539632262	0.139630078776879	-0.036540476637821	-0.0193913771687813	-0.0226741713084574	0.114980238323733	0.0959300925982692	-0.0197860764869143	-0.0304921617797659	0.090045175507224	-0.0613277947350202	-0.0547843617619506	0.12997130999644	0.0945452146260153	0.127492047515116	-0.00807952834754853	0.0803569713939826	0.0849195396408896	0.114726834108952	-0.0152647405552914	-0.0175618670840774	-0.0524144710361828	-0.0324102684383246	0.19703785393487	-0.0126360770167254	0.047367369012035	-0.0815597393549536	0.0997984147782976	0.0781426214644835	-0.100154324171559	0.0198224392261684	-0.0474824760983129	0.0489257583361281	0.0993859851005004	0.0949605878156282	0.0751492194119139	0.0803343892364197	0.0791957824216452	-0.027863808648836	-0.0525487853575766	-0.0108587488593626	-0.0200903809413611	-0.0678324202491452	-0.0305241192301068	-0.0164361575777188	-0.0613645894173315	-0.0449670006024631	-0.0471766030296152
0.106972009106198	0.0729084861464459	0.115741574980281	0.133004088383839	-0.0515564374941998	-0.02297284351845	-0.0365721364007409	0.0847654739347798	0.155521771808691	-0.0592555565799545	-0.0304347218789189	0.0789896366456919	-0.0272044580059366	-0.0375840226730718	0.078294242423987	0.095946166373622	0.125895577605279	-0.0430644087254015	0.179910525885521	0.11242493284263	0.120199400580742	-0.0494729492782012	-0.0496131814981775	-0.00899939401626035	0.00160177825041932	0.127974910367302	-0.0421009456372266	0.152899676333514	-0.0283564604693523	0.0597307406319814	0.13310671187	-0.0257318808841806	0.093844316828852	-0.00182172177823183	0.0757525609053656	0.174415342047863	0.181705229192384	0.114695571173229	0.0566540492745172	0.0870141358109728	-0.0214710603213971	-0.0588007268095278	-0.0437220218868489	-0.0534514823353723	-0.0385811223129348	-0.0597583651912469	-0.0360231309284895	-0.0438247879316009	-0.0187516996153234	-0.0458441170348753
0.141612734230887	0.0819169912132879	0.108136214509194	0.126962304302708	-0.0370982937854122	-0.021856189907053	-0.0401876956740557	0.0728304762285358	0.183998919007242	-0.0570829113402125	-0.0100789326494202	0.0697796203180769	-0.0465722918316672	-0.0462990237305983	0.0931490655879208	0.0821215158471799	0.101258782034156	-0.0462448774177791	0.155885390072298	0.0669216846964335	0.0595727332751756	-0.0394067185109947	-0.042341592247888	-0.0510820905626561	-0.0323628917266856	0.112261284102375	-0.0386131472154463	0.117203265198709	-0.0661243944611677	0.100134800397779	0.111933511354376	-0.0575353281760016	0.0573485152071929	-0.016208282510147	0.0429453695189966	0.119565198710974	0.0815772664378037	0.0874762458589397	0.0508014793206402	0.0689632650526697	-0.0328655580308233	-0.0631002593288461	-0.0138588592881121	-0.0344775901277141	-0.0563268705717345	-0.0217787834554178	-0.0473667296637119	-0.0439309754935891	-0.0372150029702468	-0.0356601524660145
-0.0364225663782347	-0.0116203843544127	-0.0315229127476142	-0.028772388337433	-0.0927113817333007	-0.033754403340189	-0.0783948969352638	-0.0112421746739508	-0.0688453841036978	-0.0683079990021359	-0.0514346431429302	-0.0532053489382449	0.00102176612248622	-0.0677572324351548	-0.0687873781949712	-0.0620309764842771	-0.0561408001845447	-0.0653060619313494	-0.0787686775859167	-0.0587761811096917	-0.032868658050206	-0.0721637288047433	-0.0848983268778509	-0.043028355581776	-0.0152885236839801	-0.0387674553757483	-0.0546674057546665	-0.0557455548940266	-0.0111944650587381	-0.0483393002052506	-0.015499272271112	-0.0740282719882257	-0.0267559102620843	-0.0463079669494723	-0.0264072829230158	-0.0492532993133016	-0.0452957836820967	-0.0194383478401433	-0.02987784946606	-0.0128754261819015	0.00351681960388734	-0.0183759912442525	-0.0513694064766252	-0.014702907211162	-0.0736487557631476	-0.0945361913891555	-0.030544066505857	-0.0423811076208062	0.0154033072592593	-0.0178553062482186
-0.0146797733893992	-0.0280742300244135	-0.0304614615809612	-0.00380028715984078	-0.0449857504501303	-0.0572138309405206	-0.0890641969781275	-0.0407390267774232	-0.030801168789168	-0.0766376694558452	-0.0660520849596514	-0.0439915734499826	-0.0202101832727706	-0.0449707936815685	-0.0686033488537433	-0.0402251067337574	-0.0514722460417103	-0.0649521419789994	-0.0601571534646834	-0.0457694927700413	-0.0332369018815182	-0.0362417645969384	-0.0746279701470833	-0.0503155542260072	-0.0336024723830994	0.00172963171551931	-0.0662917783492061	-0.0391052235059604	-0.0745493720862239	0.0288969433970998	-0.0438077148916629	-0.0960734130874625	-0.0244395846415517	-0.0592088020243491	-0.0312207034156081	-0.0489017834898229	-0.00558743419961906	-0.0284971832784177	-0.0139900448584351	-0.029234630700734	0.00490063563659688	-0.0242480794317355	0.0506912856080986	-0.031690441100312	-0.105090805517719	-0.0831953586487352	0.0369857949914942	-0.0451818085963368	-0.0473194314748547	-0.0110768280561635
-0.0674933393064247	-0.0364502587020602	-0.0396652511599499	-0.0682789819730138	-0.078836641786094	-0.0696797068311981	0.0221069621484327	-0.0343663537693107	-0.0447654273459678	-0.0805901119425706	-0.0748923769522801	-0.00116273587225596	-0.0607917977628394	-0.0903167207655708	0.0238148099409262	0.000230946811170062	-0.0615453319754343	-0.0920087759802027	0.0041989464498695	0.0124339146703099	-0.0289752737582863	-0.0796148868635218	-0.0772150603877426	-0.0649384466518538	-0.0857804275993972	-0.0190563001591518	-0.104978059545535	-0.000530262941819712	-0.059131760998811	-0.0846299475844238	-0.052334091778785	0.0220634458887676	-0.0654478503803098	-0.106391774585209	-0.0730669426568425	-0.0245754084216106	-0.0471389971836471	-0.0593923696610168	-0.0503785633441375	-0.0430202453669991	-0.0183889788524166	-0.0666475044408346	0.00733735764618305	-0.0166214568153095	0.0353115673211563	-0.0252742850092316	0.00290252119575489	-0.103823464230556	0.00011524337670606	-0.0185609092392889
-0.0164626319872428	-0.020559910375643	-0.0384976850783895	-0.0476189225426319	-0.0356669053361349	-0.0415146463053992	-0.0941658457108433	-0.0196526628149131	-0.0496826865917368	-0.0168979650709279	-0.00652293358142246	-0.0563856771656881	0.00410495917025164	-0.0150338520944488	-0.0503358018368508	-0.0430204303027678	-0.0473397059814659	-0.00131194204859378	-0.0228264325687386	-0.0548665490358378	-0.0512789101763128	-0.0490781867005992	-0.0809828281469408	-0.0242792238667114	-0.0386676160372178	-0.0255156732354192	-0.0586280743926956	-0.0178053514178905	0.018726759634643	-0.0334644219752514	-0.0308027630389032	0.0409062637380087	0.0110107369898751	-0.0820071320653046	-0.0012392507923347	-0.0493906845400031	-0.0412186933490301	-0.0221579210317748	-0.0246846149971006	-0.00703623262764278	-0.00843511633902537	-0.0207567762739965	-0.00684446986923246	0.00953668458805984	0.00623192615879219	-0.0698360629402196	0.00452017489247279	-0.0168779238375095	0.0237576744160139	-0.015581519787944
-0.0177257892920179	0.0129744480559057	0.00137294555866652	-0.022750830282256	-0.0916844022566252	-0.0520262323265716	-0.0943186798839317	0.00628450360379619	-0.0375597388409766	-0.097108240584623	-0.0551663485704794	-0.0263381222059545	-0.0345055801130941	-0.0670277955930357	-0.0510257104139068	-0.0112324584767642	-0.0107246848491584	-0.0481174456631534	-0.0495205567895689	-0.0420514813909751	0.00630254187072235	-0.0674995717882604	-0.0782963805463318	-0.0238138481902308	-0.0433225186340607	-0.0234814973724095	-0.0831545691736809	-0.0553654699450088	-0.0412234283501235	-0.0177095758211779	-0.0125212325675936	-0.0219208791200314	-0.0127017723036375	-0.0532066761382247	-0.0434956310117395	-0.0385152088858528	-0.0645831021289052	-0.0500066652313552	-0.0489410100906288	-0.00842280711306177	-0.00828973446485295	-0.0412571417327704	-0.0562455735938255	-0.0408934650147265	-0.024687229342481	-0.0861552835294846	-0.0468592235090419	-0.0610669176357406	0.000590134036453452	-0.0180525635191617
-0.0123473353143194	-0.0533866091173744	-0.0450815035255977	-0.0464946784043215	-0.0772917441455376	-0.0263097752873551	-0.0405847463534421	-0.0597396998758698	-0.0305689379557719	-0.0459252950036791	-0.057247189825487	0.0124484246559815	-0.0317109036885743	-0.0796891917782426	0.00558566660255193	0.00470852833725822	-0.00511982143769389	-0.046653423396302	-0.00213163487991363	0.0139288895163679	-0.00296569647700705	-0.0603965939824333	-0.0368086572325952	-0.00962781242966455	0.00614848172225533	-0.00555811373505551	-0.0399408218869194	-0.0113478835938243	-0.01671001543524	-0.0333864311756874	-0.0566987321343643	-0.0533957891928217	-0.0379745124482969	-0.0308778833109888	-0.0393190369486348	0.00975836524955635	-0.0494560557335206	-0.0360099659952436	-0.0399414385482619	-0.0337771749711005	-0.0532191728298791	-0.0645631144941499	-0.028878239981877	-0.0606566445700053	-0.0586206632407058	-0.0473018572069453	-0.0674651255008979	-0.0598400271477055	-0.0556488253273339	-0.0514277445335025
-0.037986077688885	-0.00934249998437119	-0.0508518235931336	-0.0467971041523863	-0.0851456735045031	-0.0982518169898132	-0.08896260161599	-0.0091077276115253	-0.0650771329660696	-0.0444873660853061	-0.0790463916775586	-0.0316202561484741	-0.0624382250644663	-0.0790068587539834	0.00476266228476374	-0.027118210491927	-0.0635230131284295	-0.0608911425790288	-0.0113017721957101	0.0166307653434886	-0.026018167925172	-0.0844227046882719	-0.0855401263748056	-0.0760154608935445	-0.0670147683169842	0.0146605135882046	-0.0854399875417163	0.0133091399035523	-0.0671740056871926	-0.0460459295596369	-0.0281573270093005	-0.0498677796157177	-0.00330804384465238	-0.125611395675722	-0.0270978740360809	-0.0457599776427509	-0.0578408498807755	-0.059068632867898	-0.0337229040105582	-0.0383664125781091	0.0401972976311181	-0.00526673153241787	0.0232011486740129	-0.00155606648784167	-0.0465084467629004	-0.0755600232845574	-0.00902014909000855	-0.0830721125996148	0.0221111548967611	0.00588615257037255
0.0618562266245665	0.0249888351475671	0.0312867046812098	0.0354452742927983	-0.021337458540425	0.0249818666304969	-0.0198157375929756	0.045723298137811	0.0519727846349739	-0.00953142315642488	0.062193394531368	0.0942829506176072	0.0295781043746276	0.0217838748746598	0.0457193485296365	0.0665018825800684	0.0412894395390505	0.00263798846803098	0.268857594479911	0.0784508327655651	0.0987014746226674	-0.030435124154278	-0.0372216600235506	-0.00026665667316908	0.00475030537092586	0.00955842941454584	-0.0179033459534843	0.346618797533504	0.0419409170848031	0.0154495866205628	0.0765399503871397	0.0497415114544792	0.0329653054080176	0.0187663477918784	0.0957059632396145	0.113919455220402	0.132415363904509	0.154906645553217	0.0783868554693432	0.122363166959785	-0.00944435477219814	-0.0187277979225631	-0.0267243599477359	-0.0317263871892545	0.035887763065456	-0.000345667734590363	-0.0352047180844173	0.0190976582823966	-0.00526431398885885	-0.020947465814354
0.0668689003460962	0.065811522971979	0.092935523689095	0.102602675772891	-0.0433198754058981	-0.0132179644357656	0.0169154691195422	0.0787401504169657	0.144916126069768	-0.0527452661062481	-0.0124081948922289	0.0507873865927103	-0.0301916453701904	-0.0583858843079345	0.101929022186868	0.0829907429677771	0.0284858919755755	-0.0535406527035927	0.0799123334304459	0.100262012258709	0.0690881973780172	-0.0504169430317879	-0.0342647870335006	-0.0354975933716591	-0.0384214436204732	0.12540715703837	-0.0555999816620056	0.0746547323540641	-0.0567000295671398	0.0248461578748257	0.0943416404323204	-0.0107247104954359	0.0546094459345586	-0.0193567682119658	0.0722422399530188	0.082925454277396	0.102519138110446	0.0586569632742312	0.0613565084199958	0.0746514060741811	-0.0517959057228721	-0.0390809721450725	-0.00354841620061649	-0.0362909634048751	-0.0057698239553681	-0.0271526266410731	-0.0444280765101176	-0.0590183989014579	-0.0336206152615329	-0.045483129931022
0.0480533748611839	0.0718306389045786	0.0902772723669453	0.0778728827511507	-0.0539350107915669	-0.0267222476321573	-0.0721047582387487	0.0984945428857444	0.061362410720805	-0.0728663917978985	-0.0368521183482655	0.0712111674790812	-0.0551120851777636	-0.0502486277866586	0.0787385406928339	0.0906210173922925	0.103478037620145	-0.0420391425608336	0.00794518296930034	0.0526906846171692	0.0526160254948668	-0.0118531976381522	-0.0216006604442651	-0.0396774980449382	-0.0408216062126184	0.529771072363327	-0.0346454531540963	0.00390794168318312	-0.0748697509870996	0.262356772853744	0.0668260006872884	-0.112318778701087	0.166330991721553	-0.0361708637307903	0.0520702163189426	0.0768354007596367	0.100559501481571	0.0239549906862166	0.0247332373329472	0.0208587429547789	-0.0476689787628909	-0.0322587908864373	-0.0452804193221336	-0.0421575198786815	-0.116437734130077	-0.0505331219391759	-0.0381197696831665	-0.0505463386154599	-0.041884549924598	-0.0368459101223654
0.0214132835450294	0.0693979298871595	0.0751252255723146	0.105564456086531	-0.0555054798995921	-0.0454131951257779	-0.0350802603570846	0.0894112371495036	0.0986358386670927	-0.0691928091939378	-0.0528617473357237	0.0633584247518647	-0.0647413437493417	-0.0609253021576189	0.0975651587888055	0.0892084618895679	0.0765930089918265	-0.0600107760366776	0.109179132862551	0.0692793504939639	0.022596682048488	-0.0413582147865907	-0.0361255499190398	-0.0670320469604359	-0.0444328012611921	0.488742204950203	-0.0490075589648601	0.0752100028593146	-0.0939902127349806	0.248588787009371	0.0989677347563915	-0.0767396072122206	0.15838239364837	-0.0447489693271154	0.0261784112538032	0.172662723757903	0.142183346976418	0.0460522175681661	0.0495741766739811	0.0534649195714895	-0.0394915681233946	-0.0302754650283328	-0.00281332932208531	-0.0329785077469911	-0.0701830408191518	-0.0254373241929252	-0.0254048800176839	-0.0643212166369387	-0.0364028692575653	-0.0169401473401065
0.0436891638308706	0.0821475493914736	0.0818859641222067	0.156607214991622	-0.0582677115334537	-0.0285220209625812	-0.0535060562534023	0.147956859574253	0.0474357703446686	-0.0600825816593632	-0.0227002404721998	0.0320268395590431	-0.0333096385312593	-0.0477250670900908	0.0687750980017482	0.0451301981895593	0.109063504554807	-0.0366163243948467	0.0593461487240771	0.0363917453483878	0.010955045290539	-0.043783336317145	-0.0537528939708485	-0.0445941257417074	-0.0409188439732028	0.109593722655598	-0.0430813286189672	0.0946532742416265	-0.0352608436442564	0.117777239215401	0.12396064326278	-0.0451103340187098	0.0564442121849586	-0.0345151323688541	0.0685677976249321	0.0379022341312892	0.0662034294842855	0.0448317070078025	0.0753838146470134	0.0901921527756624	0.0194223128320008	-0.0153651953749084	-0.0427827737534247	-0.0199872971582032	-0.0461434426923952	-0.0487953657546907	-0.0486404436334947	-0.0382929959497561	-0.000689260175069042	-0.0186105050424258
0.106874389906234	0.105605826557467	0.150365053988135	0.12461161967809	-0.0166402174816654	-0.0276396238184737	-0.00616593581289515	0.116744148207121	0.433638989754579	-0.0471466463907041	-0.0512063783007485	0.0672784512723021	-0.0324232725057975	-0.0614037334221263	0.144909818798645	0.0651118516491501	0.08233338938656	-0.0404821909061566	0.183954337235629	0.0708438675887361	0.0534986674723126	-0.019439128146202	-0.0578395716316689	-0.0415473328770565	-0.0732965719392508	0.122108658571876	-0.0568966003605479	0.133900607531128	-0.0529674065158005	0.0599173830260456	0.145648616122187	-0.0470170986248928	0.0524357610838629	-0.0302159641128516	0.175759265396923	0.0902909976032757	0.113662757570454	0.0138610649391704	0.0205611107665189	0.0273180274933222	-0.0117731570879901	-0.0148498796984622	0.0223625810641598	0.00121967067110202	-0.0125138074803736	-0.0256823166227609	-0.0161053974459079	-0.0609465023724405	-0.0061466581085081	-0.0152586983747605
-0.0349745220451458	-0.0089316859579195	-0.031271266826102	-0.0121690029905115	-0.0586283347128223	-0.0741095414955201	-0.100853168115543	-0.0273471510401644	-0.0653149527763943	-0.0645386312002041	-0.0738269481315968	-0.0629580450522146	-0.00840187434408442	-0.0524657463791276	-0.0693512109399515	-0.0496200865857473	-0.0390926900017295	-0.0483874521825561	-0.0715816640907214	-0.0532518183715352	-0.0289352720718357	-0.0407419487724817	-0.0870541510583239	-0.0436007284899177	-0.0294034575795808	-0.0276411705200225	-0.0765238063894014	-0.0658224097452866	-0.03942751251745	-0.0220235142446139	-0.0352739012905961	-0.0671651142496422	-0.0522909689453158	-0.057572909354941	-0.0228057331185332	-0.0777736151339386	-0.0242950447355044	-0.0401652122896129	-0.0252543980775216	-0.0306768899625046	0.0401956384749487	-0.0183435314894341	-0.0136784133322363	0.00136954803266164	-0.0809626200740609	-0.08501682574671	0.0714630650460761	-0.0493254878875766	-0.0154183426204595	0.00652662600744727
0.0944801443157331	0.0977320741982085	0.11584957624548	0.133520973193357	-0.0253289496289838	-0.0172206478157616	-0.0571368315472904	0.117985711214111	0.03127698352842	-0.038811822832631	-0.0282665481108065	0.116867552779449	-0.026924719888138	-0.0284485387163632	0.0878394988801164	0.138815622976066	0.207897403681432	-0.0235172241466265	0.0159849090972634	0.0974259833014359	0.102824206122982	-0.0165051567891892	-0.0368705133082931	-0.0382075120906386	-0.0247734238581987	0.198929959966784	-0.0166001296810369	0.0469931918453488	-0.031738386054806	0.227302628778101	0.110141246631273	-0.0528910099996324	0.416845538717598	-0.0316996567899768	0.172263602175433	0.0517155569701777	0.113993525378453	0.0799362510409666	0.0899651607089871	0.0525946143022163	-0.037683097518093	-0.000186712540250085	-0.0367902673462388	-0.0293643887845696	-0.062772487452226	-0.0387329112077387	0.00232573910692331	-0.0186322819395979	-0.0152875648657797	-0.0311329340667523
-0.00764656849396938	-0.00838726455259921	-0.0324173201706014	-0.0362213057301977	-0.0364757666082281	-0.0845500973570364	-0.0790505168835542	-0.0188807320567739	-0.055386913903878	-0.0472317259578277	-0.0843929584506779	-0.0327832185246765	-0.0272567800124116	-0.0482260282537677	0.0198992711093212	-0.0400411840210381	-0.0444917454894489	-0.0494865402616978	-0.0393927291238898	-0.0113057912014461	-0.0374052104843928	-0.0456320469044168	-0.0805305433276393	-0.0544140922736792	-0.0569219292588805	0.0109483696697128	-0.0690056363730062	-0.0244530637982547	-0.0535987921521448	0.00442509384194759	-0.0289210190617053	-0.0660304921615996	-0.0180602098306364	-0.0767096700383206	-0.0372817897841951	-0.0291049893911469	-0.0541425225235713	-0.0608256192242226	-0.0564190420762355	-0.0371175173372143	-0.0103225098270873	-0.0502962441505664	0.0265789481722011	-0.0158593859970625	-0.076735985792288	-0.0791054464973299	0.0055108029308931	-0.0400847839710384	-0.0284368060109417	-0.0106504041044209
-0.0049891610228061	-0.0227364718073751	-0.0568569274025868	-0.0519848400815408	-0.0809103653424102	-0.0803323383902798	-0.0788769892383974	-0.00656872143880443	-0.0402505946107019	-0.0247935582089766	-0.0202853939897411	-0.0345419915740508	0.0127327503581051	-0.0449649104282565	0.00990561278380802	-0.0382335165039581	-0.0543594922938918	-0.0373888350892317	0.0335915340681202	0.00840967617402962	-0.0344762832242406	-0.100197240544856	-0.115290438679312	-0.0612176076011871	-0.0243000739139748	-0.0128961281190178	-0.103923539868281	0.0207263396167872	0.00685758581036475	-0.0551026296281847	-0.03474054949817	0.0545856509139442	-0.0289412730838737	-0.107124516359941	-0.0116306857784951	-0.0122101043139336	-0.0497091351421541	-0.0261649400691822	-0.019137384499985	-0.00701088335036946	0.029135492352565	-0.0147596532614641	-0.0371472090389237	-0.0587479166281015	0.0596403205413889	-0.0974222414806278	-0.0697967756158036	-0.0517971853924676	0.0287153359704565	-0.00154400064761046
0.111611692776448	0.122172489304105	0.215760968962511	0.186730440902466	-0.0556069586987047	0.00968080264080796	-0.0149902282280643	0.180858665376251	0.0903912713771384	-0.0553969573121384	-0.0377851865649615	0.0936534023969068	-0.0307171952688529	-0.0634169397472751	0.126144212063372	0.153689908195985	0.380647534936391	-0.0309086176778312	0.0980946295010088	0.128342313773637	0.133230273996797	-0.0223623486255917	-0.0300369440374782	-0.00890811772415777	-0.0447441379717151	0.0839192195125114	-0.0115180752024347	0.0381424557716516	-0.0119389673967131	0.0804223761773246	0.084498044133646	-0.0443341391270069	0.245836268825548	-0.0269906130355009	0.124972196059337	0.0157092308414758	0.0811078894725708	0.0438475231462519	0.0629353777345685	0.0747691126509366	-0.0245841346644259	-0.00862376078296125	-0.0284607507983262	-0.000269326572729351	-0.0726702965363926	-0.0354434183178481	-0.0531422248151488	-0.0493906336968368	-0.0131399552176252	-0.040491067574868
0.0757436417106404	0.11881291727051	0.173273437674626	0.132020673291408	-0.0592371118549015	-0.0186260059441309	-0.0255149188821547	0.168406498170919	0.0252739558685973	-0.040538540796876	-0.0283322040668104	0.121947170512921	-0.0672817195535437	-0.0462551109218349	0.147663490364791	0.182207075683554	0.389884559668319	-0.0157793673100363	0.0405404778151513	0.205593214404899	0.228913022411187	-0.032842096661967	-0.0182385561960553	-0.036373404546229	-0.0467284649813931	0.109896806241399	-0.00210946998815619	0.105499985001406	-0.0596218027097718	0.10402215291161	0.0944532798867145	-0.0775452708930618	0.26830050618861	-0.0442888981634917	0.0912088875510935	0.124977880575402	0.111310590839696	0.125771259335915	0.114049830764605	0.150465927429569	-0.0356162964826526	-0.0339704741193809	-0.0551186440717361	-0.0379823265172857	-0.0699950626957525	-0.0299857564875653	-0.0445859886426114	-0.0616195178648089	-0.0409530271200924	-0.0423458426211046
0.125546993201546	0.0665982749257848	0.101082242364212	0.0966218712158484	-0.0623750563515842	0.00626138724167363	-0.0195665779684802	0.0565782060490269	0.0628526035516678	-0.0468323092042495	0.00880292940567542	0.180520485229762	-0.0453251668158319	-0.0567727635984134	0.130052149543871	0.164269358190632	0.148289687295364	-0.0433491056106871	0.051522550600113	0.134840899803253	0.166132778466733	-0.0320365370002421	-0.0236041997046152	-0.0256816105509343	-0.0382031462088823	0.219666727241574	-0.00789788111483697	0.0719113684750598	-0.0492515474314823	0.122800294423596	0.0950075583246106	-0.0797347178550207	0.0462181946853679	-0.0408118625031014	0.0362898266056136	0.223812128185665	0.103407876505875	0.139754205318153	0.0535172816228304	0.109910776164595	-0.0508253035510866	-0.0667094684667672	-0.0376864273285417	-0.0493531806679026	-0.0850841134535983	-0.0145877123597513	-0.0456577028088148	-0.0555867593258509	0.017538722319034	-0.0299636186450651
-0.0516523202008734	-0.0521893720263181	-0.043462027321642	-0.0543631773467696	-0.0610077986836979	-0.0558111713965066	0.00534455677458516	-0.0532928953836021	0.00902165491554971	-0.0966502840917271	-0.0932147418973719	-0.018457258648789	-0.0833815559061618	-0.08858860564257	-0.0288717566099724	-0.0454047281157635	-0.0448556936819551	-0.0750302319947957	-0.0171804684373655	-0.0436430556631958	-0.0432187659208359	-0.0585664909653843	-0.0635129156268218	-0.0479955162198545	-0.0581500093830309	-0.0165477658815356	-0.0819672315594806	-0.0440657105514874	-0.0940443180876361	-0.0395179227133888	-0.0734939558343896	-0.0231736002743632	-0.0368887826176868	-0.0595855480974574	0.00413696734339436	-0.0456067023062197	-0.0151270562102047	-0.0641868771600443	-0.0481169155984434	-0.0445282325921513	-0.0641731436765063	-0.0360598419548788	-0.00664929101649218	0.0552789865835767	-0.0187328229105858	-0.0379088365814594	0.00939887367212473	-0.0857762410678425	-0.0796627939959121	-0.0521740192797561
-0.0522581452604806	-0.0677461724004793	-0.0659571529311293	-0.0731690639597308	-0.050541998034056	-0.0462898698588773	-0.0178640595292119	-0.0641358627077342	-0.0411485303880083	-0.0572009587043593	-0.071972058454215	-0.019449524403948	-0.0310606852132088	-0.0670093580750707	-0.0175748064497272	-0.0295557210591648	-0.0420683817094789	-0.0672036765286518	-0.00841592468585601	-0.00684069788726871	-0.0301897243893889	-0.0470378147680126	-0.0693986795470985	-0.0380559134698718	-0.0350391415819179	0.00483189375201245	-0.0744840243128907	-0.0276409837571618	-0.0592150731808689	-0.0270017480030352	-0.0695269920963508	-0.073749168546469	-0.0430225948347039	-0.019348589297674	-0.0418673101226374	-0.00896275886258209	-0.041139345546389	-0.0409496053444189	-0.0596295591909455	-0.0418758032224919	-0.0641836876009336	-0.0746952974258624	-0.00382527683055223	0.00387146415049551	-0.0627912515502903	-0.049640964639605	0.0182682665416559	-0.0531669828543754	-0.0580391219437546	-0.050939871783225
-0.00379584195771286	-0.0363530768526839	-0.0177030669974108	-0.0306423084375858	-0.0809756207159344	-0.054251546418448	-0.0727472678494505	-0.0398341387427165	0.0168804512106658	-0.103536102947581	-0.0841807265173167	-0.00683647814145109	-0.0569463112254927	-0.090422558116031	-0.03872776006448	-0.0307980248022893	-0.0228475030040775	-0.075881863306684	-0.0316095752342424	-0.0446498721781197	-0.0130790050653447	-0.0605923506670015	-0.0882449138079597	-0.0271470305511454	-0.0195045512900718	-0.0267890374712666	-0.0776441267359007	-0.0456368117021036	-0.0665193477192543	-0.0257106633522637	-0.0455892439516388	-0.0899521724598722	-0.0378897175896241	-0.0535892995200427	0.0210213267323059	-0.0237365588248744	-0.0303666798739805	-0.0329639170654029	-0.0421166675449725	-0.0367414789516257	-0.0516683354926185	-0.0438762278317154	-0.036401139158718	0.0186494762320167	-0.10062015900317	-0.0735975866079095	-0.010746391160365	-0.0847740806701601	-0.0803245375541627	-0.0428849401655758
0.014412739048266	-0.0375636530563405	-0.0284965072527342	-0.0349371678647876	-0.0698878170496438	-0.0375292083499889	-0.0460567255411672	-0.0445146269060937	0.0060625866964538	-0.108309716650933	-0.0587172363183721	-0.0145239589234676	-0.0724340944635291	-0.0874533756534609	0.00406827192591366	-0.00672050767849171	-0.0397507884995486	-0.0761993644707447	-0.0507412664769853	-0.0280656255863629	-0.0266057142899961	-0.0574354017689175	-0.0792955866446886	-0.0315382722200611	-0.0485719911103525	-0.00565707635183804	-0.0673845648150121	-0.044285539021766	-0.0845739608117549	-0.00475653772742398	-0.0569537272274713	-0.076228556879511	-0.027521226387713	-0.0681327746595997	0.0144167497773895	-0.0373289343811773	-0.035457719165599	-0.0164557242317629	-0.0226691801028672	-0.0420226110409536	-0.05237459463434	-0.0474980306564959	-0.00782763477309049	0.0590692664002108	-0.0788088023702329	-0.0565122223784508	-0.0167268200339316	-0.0789003198222697	-0.0747315838298589	-0.060379684312207
-0.0616561038379657	-0.0339241722929369	-0.0452905058121201	-0.0565458070281768	-0.075073697811666	-0.0540646490057208	-0.0494716739872434	-0.0296483417053438	-0.0438802229485776	-0.0705026885582421	-0.0588156723477047	-0.0280546907531926	-0.0573654438248389	-0.0860375821100613	-0.0201905065576536	-0.0430568967203269	-0.0519429660784971	-0.0749342747947475	-0.0132161888758196	0.0082223928801251	-0.0379087414026996	-0.0794784251751126	-0.0686367730638516	-0.0590688250607174	-0.0647554423481326	-0.00458266588765998	-0.0741310267440097	-0.00882661182662421	-0.0609190765842459	-0.0503359868736909	-0.0440702884160135	-0.0523015316933522	-0.0467260855884101	-0.0602205474624143	-0.0213052435886761	-0.0199007207070798	-0.0528221949765763	-0.0469519367516116	-0.0635459565462375	-0.0286282027375048	-0.0242994518309455	-0.0244470367040226	-0.0272634602968388	0.0270677788668421	-0.0491022186979857	-0.0588483212973356	-0.00976592550777467	-0.0639169465721681	-0.0145182868029304	-0.032718706050745
-0.0271128035703974	-0.0303160447617222	-0.0234619320611688	-0.0373682068106853	-0.0422633099952431	-0.0609936727842393	-0.0553237158073445	-0.0300543184319457	0.0100525616610927	-0.0917382390054545	-0.0792972493613209	-0.0369305527122932	-0.0229130529941957	-0.0454826322664969	-0.0336240493449969	-0.0561217476624789	-0.0323257697959063	-0.0580436814488968	-0.0338041721157232	-0.0448687558140216	-0.0356236208563559	-0.0291197820865436	-0.0854892204366262	-0.0506034170216664	-0.0382848039767194	-0.0221089866807913	-0.0739333992621547	-0.0433576881975366	-0.0714365650790287	-0.000473420451385878	-0.0373778651646426	-0.0751774847181059	-0.0337148349435597	-0.0420828144550263	0.0143186313170641	-0.0481263703255623	-0.02319858010574	-0.029340837123921	-0.0459508760828056	-0.0161948618423741	-0.04732042375052	-0.0287449049980304	0.0237545587213213	0.0422868355059475	-0.0787855015486457	-0.0721664874923879	0.0149227229295855	-0.0414017279775022	-0.0543500700839959	-0.00579434781698427
-0.0191934478448821	-0.0332900859371765	-0.0201278270219564	-0.0277217646033889	-0.0722521186178472	-0.0369009084910951	-0.0669163189095812	-0.0414325252827511	-0.0241964728822226	-0.0562262661881566	-0.040119742507569	-0.0228448644726098	-0.0637308994326152	-0.0756271133257241	-0.0492257615146229	-0.0350576402058169	-0.00121877977930724	-0.0403543096412102	-0.0929644778742197	-0.0391369959844356	-0.0237054635047702	-0.0461295102530899	-0.05317903373513	-0.0108911441532096	-0.00834666917292226	-0.0454452734938098	-0.0314840347589127	-0.0338923237857459	-0.0437506038815617	-0.021515427516646	-0.0450875090721886	-0.0936721084832124	-0.0446696969722152	-0.0584379267896324	0.00939695942470276	-0.0413631427344004	-0.0184372894632664	0.013072823765889	-0.0081587812634032	-0.0220756321201913	-0.0447121178070646	-0.0150381435566074	0.0043756516817166	-0.0149976228022523	-0.10750488205011	-0.0592988121692298	-0.0182591418146426	-0.0675518548067923	-0.0464454876574915	-0.0433950550215893
-0.00296526060943879	-0.0096060541451844	0.016498638146667	-0.00788117419452452	-0.0468833530163656	-0.0450940391921673	-0.0805998331631229	-0.0136014444652968	0.00744712866119304	-0.0869097712220188	-0.0667400792316138	-0.037862642744284	-0.0234157095653277	-0.0382296470337592	-0.0107129459325773	-0.0148216784316021	-0.0336620184489414	-0.0666710978283783	-0.0470077854939752	-0.018196766721605	-0.00334030370149655	-0.0223083976788057	-0.0763304334124738	-0.0286281530728776	-0.0447671907040682	-0.0027797946199788	-0.0629976902507248	-0.0677916530503539	-0.0875539323446651	0.0170018226083676	-0.014149412585941	-0.0982419855113074	0.0251748428681985	-0.0541373892048809	-0.0304906522532076	-0.0312038869929956	-0.049213695069848	-0.0245173597947552	-0.0381220880726225	-0.0255858052597305	-0.077393010664744	-0.0648515648145597	-0.0192595747723772	-0.0375999442244964	-0.113272641527277	-0.0792548805955712	-0.0110117602183055	-0.0471547712783257	-0.0790435620434198	-0.0365714716515058
-0.0437588778529329	-0.0404382740709683	-0.059494421108916	-0.0636939366645406	-0.0867551251682866	-0.0345886953304136	-0.0823126013630816	-0.0459634341767092	-0.0444575001738337	-0.0537598871444375	-0.0345907847593976	-0.0389177439418704	-0.056350371654217	-0.0828094953334848	-0.0681374906171182	-0.0578937258372037	-0.025103928155927	-0.0389837684712822	-0.0851141204399063	-0.044649578739651	-0.0569931988376573	-0.0742657062891567	-0.074146541984493	-0.0452868967613132	-0.0368046605139291	-0.0636197620669513	-0.0506797823125166	-0.0434782347293191	-0.0372971758372522	-0.0464435362075346	-0.0502425688644866	-0.0502098142375589	-0.0628278537505729	-0.0750385668121983	0.0282054118826243	-0.0733363196527278	-0.0406793082453965	-0.0288645886203859	-0.0325396322224267	-0.024153379461739	0.00043671834641306	0.0125333956007096	-0.0305566780610353	-0.00218554247398505	-0.0762950232206079	-0.0808260706279571	-0.0196251094245108	-0.0708124935232384	0.00894118955457752	-0.0203808898268687
-0.0272901514409144	-0.0334699034729245	-0.0298831366767636	-0.0024904329743891	-0.0762174707399923	-0.0426775831765318	-0.0738029683104186	-0.03710136165535	-0.0319259346220999	-0.0582875790652869	-0.0397563763246577	-0.0375034514824937	-0.0657472750753917	-0.0873139523089123	-0.0523126421868973	-0.0431709488738146	-0.0200848001842266	-0.0482572631943788	-0.0915779358565992	-0.0509045827737602	-0.0338232177817713	-0.0619638740024448	-0.0605989355458734	-0.0189551787294404	-0.00408532107276023	-0.0488892830172485	-0.0380421836719598	-0.0325893486399492	-0.0531644668619203	-0.0392651946273644	-0.0465991187988634	-0.0976074523055629	-0.0529848044779082	-0.0472871097730617	0.00543517788600475	-0.0412751683400122	0.00871676847852816	0.0214203335516418	0.0226919824758415	-0.0378060608857595	0.00221345881793499	-0.0127133416306832	-0.0123359431430719	-0.0308982468373069	-0.10902474766852	-0.0571137514797769	-0.00836611451671818	-0.0777420197088542	-0.0391346959610332	-0.0443237765573378
-0.0228463965525372	-0.00929536226587262	-0.0347505696463034	-0.00568603080892818	-0.0861714653511556	-0.0706904812922523	-0.104230035555667	-0.00493924903552251	-0.0386370942586844	-0.0802017500580123	-0.0583117421477021	-0.0457871340720389	-0.0531557211066976	-0.0629316184043095	-0.0611327808670941	-0.05674534313766	-0.056410669127828	-0.0616325858173906	-0.0717603708423978	-0.0341168939904478	-0.0265123672654158	-0.0593362875812726	-0.0882954844440448	-0.0666173524401719	-0.0498783636481532	-0.0121625796980374	-0.0715422619809017	-0.0594448307353349	-0.0755601007576674	-0.00257712454483374	-0.0270293359314674	-0.0763298923296834	-0.00995518509895392	-0.0949562201214055	-0.0142240916658383	-0.0543979290129109	-0.0141053860332877	-0.0454366832884031	-0.0113878615779751	-0.0297085813392095	0.0672954174563085	0.00779833946875595	-0.0338030719157665	-0.0220071739496318	-0.0835215034114393	-0.0842712167534253	0.0221223394230589	-0.0685883493063084	0.00799548447665256	-0.00660826536957661
0.0108542634479327	-0.014084082254299	-0.0274145090943404	0.00620516446674594	-0.06796193762183	-0.0566801773187218	-0.112461515752434	-0.0117466283273158	-0.045813436446778	-0.0954562973503204	-0.0514733399708929	-0.0194787730745928	-0.0325840221999378	-0.0675705706258735	-0.0292746145113198	-0.0392367826444752	-0.0402572826838466	-0.0695058129055557	-0.064902107852105	-0.0290868521225562	-0.0211550268613874	-0.0598666175467776	-0.089661056698817	-0.0521188209792027	-0.0450941596713644	-0.00688745039806041	-0.0800209070803493	-0.0500816293814198	-0.0491050605318541	0.000935079724314284	-0.0255561488114018	-0.077884222948603	-0.0257174351106704	-0.0855002416861255	-0.0275002656384825	-0.0695650166561376	-0.0146434371099176	-0.0361274880116552	-0.0191215537423486	-0.019613587095067	0.0524371750383317	-0.00946551503153257	-0.0231097739389004	0.00146145581468109	-0.0953484096320688	-0.0827937263731467	-0.00229628546627673	-0.0550035819952541	0.00444426935802126	-0.0150338441039706
-0.0551685041714009	-0.0167535841075364	-0.0516933301938659	-0.0605063094699118	-0.103372379706333	-0.0725223556040726	-0.0480182723917208	-0.0268523492726439	-0.0770706630437459	-0.0819491653142167	-0.0757134362267053	-0.0315671140037925	-0.0156774118445979	-0.0822230590990257	-0.057922859257463	-0.0301101635289847	-0.0411759735799546	-0.0620154716004853	-0.0533688721997331	-0.0644594311736556	-0.0521643755374612	-0.0799678919798524	-0.0728140548768718	-0.0372989654138439	-0.0184832887230487	-0.0371293617956844	-0.0911889258643834	-0.062538608513041	-0.00238622965930867	-0.0633324873568195	-0.0271374672101991	0.0520729800970296	-0.00503516616980811	-0.0787848459838069	-0.0395416996314349	-0.0549286523611891	-0.0489040730549313	-0.0509110913503607	-0.0472111413058433	-0.0414061329275121	-0.000332888941900809	-0.0324738347710876	-0.0779112423104303	-0.0261980079637315	0.0471755675721485	-0.0885908462595871	7.03307082942905e-05	-0.0653819408055155	0.0416203545443983	0.000899334420496602
[truncated: 54 more rows]
[truncated: 407 more columns]
